# Supplementary material for: Identification of miRNAs Contributing to the Broad-Spectrum and Durable Blast Resistance in the Yunnan Local Rice Germplasm
Source: Front Plant Sci. 2021 Oct 14;12:749919. doi: 10.3389/fpls.2021.749919 (PMC8551726; doi:10.3389/fpls.2021.749919)
Supplement: Supplementary file 1 [file Table_1.XLSX]

## Sheet: replicate1
Table S1. Distribution of sRNAs annotation in each library （replicate 1）
	ZY44										JNXN
	mock			M. oryzae							mock			M. oryzae
	0 hpi			3 hpi		10 hpi		22 hpi			0 hpi			3 hpi		10 hpi		22 hpi
	reads	1		reads	1	reads	1	reads	1		reads	1		reads	1	reads	1	reads	1
Total sRNA	16109881	100		18534333	100	19677464	100	24172196	100		14233670	100		30266598	100	18057711	100	18143356	100
rRNA	3904603	24.24		5391470	29.09	5528994	28.1	5911417	24.46		3336239	23.44		7668558	25.34	4107965	22.75	4436119	24.45
snRNA	274	0		8642	0.05	11026	0.06	11171	0.05		245	0		15981	0.05	7291	0.04	6796	0.04
snoRNA	171	0		434	0	350	0	237	0		102	0		928	0	138	0	176	0
tRNA	265308	1.65		316214	1.71	417310	2.12	474418	1.96		266185	1.87		539079	1.78	368134	2.04	384803	2.12
exon sense	372937	2.31		277621	1.5	474048	2.41	611928	2.53		343125	2.41		646543	2.14	418723	2.32	423382	2.33
exon antisense	78933	0.49		131577	0.71	84445	0.43	123610	0.51		66522	0.47		181460	0.6	113853	0.63	65852	0.36
intron sense	238526	1.48		145608	0.79	231178	1.17	349106	1.44		177803	1.25		323276	1.07	206708	1.14	234974	1.3
intron antisense	29919	0.19		26506	0.14	23030	0.12	45291	0.19		28325	0.2		59894	0.2	36386	0.2	33208	0.18
repeat	2844777	17.66		1775348	9.58	2277387	11.57	4169385	17.25		2479678	17.42		4184093	13.82	2750412	15.23	2992047	16.49
osa-miRNA	4380220	27.19		5124025	27.65	5050602	25.67	6476011	26.79		3809700	26.77		7421437	24.52	4794253	26.55	4750637	26.18
osa-miRNA edit	214374	1.33		278796	1.5	208380	1.06	269065	1.11		194191	1.36		338936	1.12	213542	1.18	257283	1.42
known miRNA	183296	1.14		126390	0.68	180938	0.92	247762	1.02		214464	1.51		338837	1.12	243483	1.35	255740	1.41
novel miRNA	13886	0.09		8105	0.04	15309	0.08	22757	0.09		12769	0.09		23290	0.08	16920	0.09	13298	0.07
unannotation	3582657	22.24		4923597	26.56	5174467	26.3	5460038	22.59		3304322	23.21		8524286	28.16	4779903	26.47	4289041	23.64
A rice sRNA deep-sequencing summary is shown. The abundance in different libraries was normalized to library 0 hpi. sRNAs were calculated as reads per million.
rRNA: ribosomal RNA; snRNA: small nuclearRNA; snoRNA: small nucleolar RNA; tRNA: transfer ribonucleic acid RNA; exon sense/exon antisense, intron sense/intron antisense might be fragments from mRNA degradation;
repeat sequences include DNA transposons, long terminal repeat, long interspersed nuclear elements, short interspersed nuclear elements;
osa-miRNA is rice miRNA included in miRBase. osa-miRNA edit means the base editing status of osa-miRNAs in our samples. Known miRNA is other species miRNA.
Novel miRNA is predicted from unannotated clean reads by software. Unannotation is unannotated clean reads.
Distribution of sRNAs annotation in each library （replicate 2）
	ZY44										JNXN
	mock			M. oryzae							mock			M. oryzae
	0 hpi			3 hpi		10 hpi		22 hpi			0 hpi			3 hpi		10 hpi		22 hpi
	reads	1		reads	1	reads	1	reads	1		reads	1		reads	1	reads	1	reads	1
Total sRNA	16008939	100		25161381	100	26487193	100	26531822	100		17716764	100		30099641	100	30426098	100	27882116	100
rRNA	4325570	27.02		5305276	21.08	8609829	32.51	7044681	26.55		5825229	32.88		6974633	23.17	7742765	25.45	6412134	23
snRNA	429	0		31644	0.13	6866	0.03	9425	0.04		531	0		33993	0.11	12399	0.04	17006	0.06
snoRNA	217	0		1987	0.01	430	0	434	0		252	0		985	0	361	0	579	0
tRNA	384501	2.4		448930	1.78	423827	1.6	606668	2.29		442722	2.5		710459	2.36	637657	2.1	812786	2.92
exon sense	331855	2.07		530960	2.11	505568	1.91	675107	2.54		490255	2.77		548403	1.82	491018	1.61	719330	2.58
exon antisense	83058	0.52		96308	0.38	145967	0.55	194432	0.73		122012	0.69		177015	0.59	149806	0.49	158499	0.57
intron sense	224997	1.41		309922	1.23	162398	0.61	307191	1.16		200303	1.13		253301	0.84	239308	0.79	351276	1.26
intron antisense	33985	0.21		44778	0.18	33459	0.13	60680	0.23		38059	0.21		50432	0.17	46425	0.15	66099	0.24
repeat	2616606	16.34		3963639	15.75	1859510	7.02	3658931	13.79		2364108	13.34		3018342	10.03	2915398	9.58	4293671	15.4
osa-miRNA	4229552	26.42		5319672	21.14	4231126	15.97	6836282	25.77		4213526	23.78		5984325	19.88	5631291	18.51	6438659	23.09
osa-miRNA edit	226199	1.41		225331	0.9	234596	0.89	388140	1.46		222086	1.25		315923	1.05	303918	1	337569	1.21
known miRNA	168750	1.05		257316	1.02	150969	0.57	215381	0.81		255258	1.44		341151	1.13	327388	1.08	540869	1.94
novel miRNA	10990	0.07		18503	0.07	10986	0.04	15794	0.06		12456	0.07		15641	0.05	14304	0.05	19261	0.07
unannotation	3372230	21.06		8607115	34.21	10111662	38.18	6518676	24.57		3529967	19.92		11675038	38.79	11914060	39.16	7714378	27.67
Distribution of sRNAs annotation in each library （replicate 3）
	ZY44										JNXN
	mock			M. oryzae							mock			M. oryzae
	0 hpi			3 hpi		10 hpi		22 hpi			0 hpi			3 hpi		10 hpi		22 hpi
	reads	1		reads	1	reads	1	reads	1		reads	1		reads	1	reads	1	reads	1
Total sRNA	14611546	100		21201574	100	19720686	100	25944344	100		15978286	100		30618529	100	16942295	100	16443920	100
rRNA	4204606	28.78		4776731	22.53	6955079	35.27	17064472	65.77		4457261	27.9		7914620	25.85	3465987	20.46	2991089	18.19
snRNA	273	0		18805	0.09	9902	0.05	5140	0.02		292	0		35265	0.12	12757	0.08	11701	0.07
snoRNA	114	0		1141	0.01	389	0	317	0		145	0		1672	0.01	305	0	153	0
tRNA	284971	1.95		399487	1.88	428323	2.17	564370	2.18		389521	2.44		580151	1.89	297576	1.76	247334	1.5
exon sense	317408	2.17		561755	2.65	401840	2.04	511813	1.97		374103	2.34		695892	2.27	388674	2.29	380427	2.31
exon antisense	71501	0.49		126332	0.6	75364	0.38	54253	0.21		83590	0.52		153082	0.5	92195	0.54	98191	0.6
intron sense	190907	1.31		283746	1.34	197691	1	112481	0.43		188507	1.18		340752	1.11	193235	1.14	201326	1.22
intron antisense	26541	0.18		35628	0.17	20204	0.1	16077	0.06		26190	0.16		54903	0.18	27408	0.16	28837	0.18
repeat	2376114	16.26		3124536	14.74	1718462	8.71	994144	3.83		2069673	12.95		4564751	14.91	2430184	14.34	2589898	15.75
osa-miRNA	3930663	26.9		5339787	25.19	3261083	16.54	2830180	10.91		3757527	23.52		5507916	17.99	3428302	20.24	3737460	22.73
osa-miRNA edit	194448	1.33		231259	1.09	145351	0.74	120440	0.46		191514	1.2		305925	1	179786	1.06	192626	1.17
known miRNA	156540	1.07		220409	1.04	165164	0.84	104108	0.4		143691	0.9		314713	1.03	175386	1.04	162729	0.99
novel miRNA	16127	0.11		21489	0.1	14588	0.07	17056	0.07		12689	0.08		23882	0.08	15204	0.09	14092	0.09
unannotation	2841333	19.45		6060469	28.58	6327246	32.08	3549493	13.68		4283583	26.81		10125005	33.07	6235296	36.8	5788057	35.2
