# Supplementary material for: Identification of miRNAs Contributing to the Broad-Spectrum and Durable Blast Resistance in the Yunnan Local Rice Germplasm
Source: Front Plant Sci. 2021 Oct 14;12:749919. doi: 10.3389/fpls.2021.749919 (PMC8551726; doi:10.3389/fpls.2021.749919)
Supplement: Supplementary file 2 [file Table_2.XLSX]

## Sheet: differential in rep1
Table S2. Significantly differentially expressed miRNAs (replicate 1)
				Ziyu44									JNXN
				mock		M. oryzae							mock		M. oryzae
miRNA ID	length	miRNA sequence	total reads	0 hpi_TPM		3 hpi_TPM	3 hpi/0 hpi	10 hpi_TPM	10 hpi/0 hpi	22 hpi_TPM	22 hpi/0 hpi		0 hpi_TPM		3 hpi_TPM	3 hpi/0 hpi	10 hpi_TPM	10 hpi/0 hpi	22 hpi_TPM	22 hpi/0 hpi
							zy3h≥2
osa-miR159a.1	21	TTTGGATTGAAGGGAGCTCTG	2.12003e+06	136333		527497	3.86918	222304	1.63059	228660	1.67721		153260		382304	2.49448	354520	2.31319	115150	0.751339
osa-miR159b	21	TTTGGATTGAAGGGAGCTCTG	2.12003e+06	136333		527497	3.86918	222304	1.63059	228660	1.67721		153260		382304	2.49448	354520	2.31319	115150	0.751339
osa-miR171f-3p	21	TGATTGAGCCGTGCCAATATC	31666.8	2439.39		8012.19	3.28451	1080.98	0.443136	3518.16	1.44223		1960.24		6236.87	3.1817	5793.63	2.95558	2625.38	1.33932
osa-miR171e-3p	21	TGATTGAGCCGTGCCAATATC	31657.4	2436.67		8011.1	3.28772	1079.15	0.442877	3517.31	1.44349		1960		6237.24	3.18227	5790.22	2.95419	2625.76	1.33967
osa-miR171d-3p	21	TGATTGAGCCGTGCCAATATC	31656.7	2436.67		8010.74	3.28757	1079.15	0.442877	3517.31	1.44349		1960		6237.24	3.18227	5789.84	2.954	2625.76	1.33967
osa-miR171b	21	TGATTGAGCCGTGCCAATATC	31640.7	2438.76		7997.2	3.2792	1080.43	0.443025	3516.17	1.44178		1960.24		6233.43	3.17994	5790.59	2.95403	2623.86	1.33854
osa-miR171c-3p	21	TGATTGAGCCGTGCCAATATC	31640.7	2438.76		7997.2	3.2792	1080.43	0.443025	3516.17	1.44178		1960.24		6233.43	3.17994	5790.59	2.95403	2623.86	1.33854
osa-miR444a-3p.2	21	TGCAGTTGCTGCCTCAAGCTT	21484.1	1162.41		3040.1	2.61535	776.136	0.667697	1446.49	1.24439		1996.16		6216.56	3.11426	4518.81	2.26375	2327.48	1.16598
osa-miR444e	21	TGCAGTTGCTGCCTCAAGCTT	21469.2	1162.2		3039.56	2.61535	775.769	0.667501	1447.06	1.24511		1996.4		6209.91	3.11056	4514.64	2.26139	2323.69	1.16394
osa-miR444d.2	21	TGCAGTTGCTGCCTCAAGCTT	21450.3	1162.41		3041.37	2.61643	777.236	0.668643	1447.06	1.24488		1990.49		6205.97	3.11781	4508.94	2.26525	2316.87	1.16397
osa-miR159f	21	CTTGGATTGAAGGGAGCTCTA	5647.45	292.167		1027.21	3.51584	869.441	2.97583	579.281	1.9827		375.787		1188.8	3.16349	1022.93	2.7221	291.835	0.776597
osa-miR399j	21	TGCCAAAGGAGAGTTGCCCTA	206.828	14.3997		35.035	2.43304	34.4623	2.39327	18.1025	1.25714		39.2331		29.1782	0.743714	19.3615	0.493499	17.0553	0.434717
osa-miR160e-5p	21	TGCCTGGCTCCCTGTATGCCG	6260.35	440.546		1250.79	2.83917	438.295	0.99489	764.725	1.73586		484.032		1392.18	2.87622	1084.81	2.2412	404.968	0.836656
osa-miR169j	21	TAGCCAAGGATGACTTGCCTG	4249.21	486.459		1014.57	2.08563	238.67	0.490628	584.127	1.20077		255.251		400.369	1.56853	852.094	3.33826	417.665	1.63629
osa-miR169i-5p.1	21	TAGCCAAGGATGACTTGCCTG	4249.21	486.459		1014.57	2.08563	238.67	0.490628	584.127	1.20077		255.251		400.369	1.56853	852.094	3.33826	417.665	1.63629
osa-miR169h	21	TAGCCAAGGATGACTTGCCTG	4249.21	486.459		1014.57	2.08563	238.67	0.490628	584.127	1.20077		255.251		400.369	1.56853	852.094	3.33826	417.665	1.63629
osa-miR169l	21	TAGCCAAGGATGACTTGCCTG	4246.78	485.832		1014.57	2.08831	238.67	0.49126	583.414	1.20086		254.542		400.369	1.5729	852.094	3.34755	417.286	1.63936
osa-miR169k	21	TAGCCAAGGATGACTTGCCTG	4246.78	485.832		1014.57	2.08831	238.67	0.49126	583.414	1.20086		254.542		400.369	1.5729	852.094	3.34755	417.286	1.63936
osa-miR169m	21	TAGCCAAGGATGACTTGCCTG	4176.2	476.441		984.051	2.06542	237.02	0.497481	577.143	1.21136		250.761		393.352	1.56863	844.312	3.367	413.117	1.64745
osa-miR172d-3p	21	AGAATCTTGATGATGCTGCAT	2048.98	115.197		455.997	3.9584	101.737	0.883156	173.186	1.50338		138.261		408.495	2.95452	487.074	3.52285	169.037	1.22259
osa-miR172a	21	AGAATCTTGATGATGCTGCAT	2048.6	115.197		455.997	3.9584	101.737	0.883156	173.186	1.50338		138.261		408.495	2.95452	486.694	3.52011	169.037	1.22259
osa-miR7695-3p	21	ACGTGATGTGCCACGTAGGCA	2032.74	170.5		424.393	2.4891	142.249	0.834301	241.605	1.41703		181.748		412.312	2.26858	233.287	1.28357	226.646	1.24703
osa-miR7695-5p	24	TGCCTATGTGGCACGCCACGTGAA	1380.47	71.9984		324.887	4.51241	86.5225	1.20173	100.348	1.39375		102.1		256.079	2.50811	242.208	2.37225	196.325	1.92286
osa-miR5811	24	CCTAACCTAGGAGTTCGATGGGAC	106.716	13.1475		51.2884	3.901	5.6826	0.432219	15.6794	1.19258		2.1271		6.6482	3.12548	9.1113	4.28344	3.032	1.42541
osa-miR444a-3p.1	21	TTGCTGCCTCAAGCTTGCTGC	106.676	4.3825		24.5606	5.60424	5.1327	1.17118	12.5435	2.86218		6.1449		26.5928	4.32762	18.2225	2.96547	9.0961	1.48027
osa-miR444d.1	21	TTGCTGCCTCAAGCTTGCTGC	106.676	4.3825		24.5606	5.60424	5.1327	1.17118	12.5435	2.86218		6.1449		26.5928	4.32762	18.2225	2.96547	9.0961	1.48027
miR159-y	20	TTTGGATTGAAGGGAGCTTG	9423.04	675.115		2084.4	3.08748	861.192	1.27562	918.097	1.35991		750.864		1830.35	2.43765	1704	2.26938	599.019	0.797773
miR5054-y	19	TTCCCCACGGACGGCGCCA	2567.76	237.281		491.213	2.07017	345.173	1.4547	116.027	0.488985		407.457		360.357	0.884406	260.431	0.639161	349.823	0.858552
miR7767-x	20	CCCAAGATGAGTGCTCTCCC	746.821	40.486		236.215	5.8345	74.0574	1.82921	70.8422	1.74979		56.2498		143.552	2.55204	94.3397	1.67716	31.0785	0.552509
miR319-y	23	TTTGGATTGAAGGGAGCTCTTTC	146.335	8.765		23.6577	2.69911	17.0479	1.945	17.8174	2.03279		13.7079		31.7636	2.31717	20.1207	1.46782	13.4547	0.981529
miR5073-x	25	GTTTGGTGAATCGGAAACTTTTTTC	107.995	8.3476		45.3288	5.43016	4.9494	0.592913	9.6927	1.16114		5.9086		16.4974	2.7921	15.3753	2.60219	1.895	0.320719
novel-m0267-5p	22	AATCGGTACTGCAGTAGCTCTT	148.154	7.7216		22.2129	2.87672	14.6648	1.89919	10.5479	1.36603		13.9443		34.4721	2.47213	34.3571	2.46388	10.2332	0.733863
							in total：32
									zy10h≥2
osa-miR166c-3p	21	TCGGACCAGGCTTCATTCCCC	127959	16568		2788.72	0.16832	36340.2	2.1934	17358.3	1.0477		20102		10689.2	0.531748	10552.8	0.524961	13560.1	0.674564
osa-miR166j-3p	21	TCGGACCAGGCTTCATTCCCC	127875	16556.5		2783.48	0.16812	36322.8	2.19387	17344.1	1.04757		20090.4		10682.2	0.531705	10547.2	0.524989	13548.3	0.674368
osa-miR166a-3p	21	TCGGACCAGGCTTCATTCCCC	121645	15683.3		2463.47	0.157076	33358.1	2.12698	16739.3	1.06733		19340.3		10250	0.529985	10365.8	0.535969	13444.7	0.695166
osa-miR166d-3p	21	TCGGACCAGGCTTCATTCCCC	121645	15683.3		2463.47	0.157076	33358.1	2.12698	16739.3	1.06733		19340.3		10250	0.529985	10365.8	0.535969	13444.7	0.695166
osa-miR166f	21	TCGGACCAGGCTTCATTCCCC	121645	15683.3		2463.47	0.157076	33358.1	2.12698	16739.3	1.06733		19340.3		10250	0.529985	10365.8	0.535969	13444.7	0.695166
osa-miR166b-3p	21	TCGGACCAGGCTTCATTCCCC	121542	15670.6		2463.29	0.157192	33333.3	2.12713	16724.3	1.06724		19322.8		10243.2	0.530108	10350	0.535639	13434.1	0.695246
osa-miR393b-3p	21	TCAGTGCAATCCCTTTGGAAT	16857	2209.83		689.504	0.312017	4814.46	2.17866	1852.73	0.838404		2255.19		1406.34	0.623601	1140.05	0.505521	2488.93	1.10365
osa-miR159f	21	CTTGGATTGAAGGGAGCTCTA	5647.45	292.167		1027.21	3.51584	869.441	2.97583	579.281	1.9827		375.787		1188.8	3.16349	1022.93	2.7221	291.835	0.776597
osa-miR160f-5p	21	TGCCTGGCTCCCTGAATGCCA	10092.3	569.1		832.714	1.46321	1223.05	2.14909	1015.59	1.78456		1129.49		2335.86	2.06807	2027.64	1.79519	958.886	0.848957
osa-miR399j	21	TGCCAAAGGAGAGTTGCCCTA	206.828	14.3997		35.035	2.43304	34.4623	2.39327	18.1025	1.25714		39.2331		29.1782	0.743714	19.3615	0.493499	17.0553	0.434717
osa-miR166h-3p	21	TCGGACCAGGCTTCATTCCTC	9774.01	1288.87		177.162	0.137454	2692.28	2.08886	1129.2	0.876112		1658.42		828.932	0.499831	838.997	0.5059	1160.14	0.699542
osa-miR528-5p	21	TGGAAGGGGCATGCAGAGGAG	4529.58	241.873		406.695	1.68144	531.6	2.19785	262.13	1.08375		596.532		1208.25	2.02546	996.736	1.67088	285.771	0.479054
osa-miR394	20	TTGGCATTCTGTCCACCTCC	3130.38	262.533		169.757	0.646613	528.117	2.01162	309.881	1.18035		411.475		448.63	1.0903	554.839	1.34842	445.143	1.08182
osa-miR408-3p	21	CTGCACTGCCTCTTCCCTGGC	1562.34	64.9029		31.062	0.478592	216.123	3.32994	84.0984	1.29576		456.616		300.031	0.657074	219.81	0.481388	189.693	0.415431
osa-miR5072	22	CGATTCCCCAGCGGAGTCGCCA	2083.44	133.353		190.525	1.42873	350.856	2.63102	69.2742	0.519478		345.062		274.546	0.795643	166.091	0.481336	553.728	1.60472
osa-miR398b	21	TGTGTTCTCAGGTCGCCCCTG	2436.28	182.187		156.935	0.861396	463.592	2.54459	287.217	1.5765		352.625		303.109	0.859578	269.352	0.763849	421.265	1.19466
osa-miR1320-3p	21	TGTAAAATTCATTCGTTCCAA	1063.23	88.0676		57.248	0.650046	204.758	2.32501	195.707	2.22223		115.808		65.9895	0.569816	138.567	1.19652	197.083	1.7018
osa-miR1857-3p	21	TCATGCTCCAAGAAAACCAGG	794.759	102.467		13.5445	0.132184	223.822	2.18433	131.992	1.28814		106.355		54.0474	0.508181	76.8764	0.72283	85.6554	0.805375
osa-miR1882b	24	AGATTGCTTTCAAGGTCATTTCTT	681.268	0.01		0.01	1	0.9166	91.66	0.01	1		193.093		119.298	0.617828	177.48	0.919143	190.451	0.986316
osa-miR1882f	24	AGATTGCTTTCAAGGTCATTTCTT	681.268	0.01		0.01	1	0.9166	91.66	0.01	1		193.093		119.298	0.617828	177.48	0.919143	190.451	0.986316
osa-miR1882a	24	AGATTGCTTTCAAGGTCATTTCTT	681.268	0.01		0.01	1	0.9166	91.66	0.01	1		193.093		119.298	0.617828	177.48	0.919143	190.451	0.986316
osa-miR1882d	24	AGATTGCTTTCAAGGTCATTTCTT	681.268	0.01		0.01	1	0.9166	91.66	0.01	1		193.093		119.298	0.617828	177.48	0.919143	190.451	0.986316
osa-miR1882e-5p	24	AGATTGCTTTCAAGGTCATTTCTT	681.268	0.01		0.01	1	0.9166	91.66	0.01	1		193.093		119.298	0.617828	177.48	0.919143	190.451	0.986316
osa-miR1882c	24	AGATTGCTTTCAAGGTCATTTCTT	681.268	0.01		0.01	1	0.9166	91.66	0.01	1		193.093		119.298	0.617828	177.48	0.919143	190.451	0.986316
osa-miR1882g	24	AGATTGCTTTCAAGGTCATTTCTT	681.268	0.01		0.01	1	0.9166	91.66	0.01	1		193.093		119.298	0.617828	177.48	0.919143	190.451	0.986316
osa-miR1882h	24	AGATTGCTTTCAAGGTCATTTCTT	603.155	0.01		0.01	1	0.3666	36.66	0.01	1		165.913		105.14	0.633704	159.257	0.959883	172.448	1.03938
osa-miR2877	24	TTGCATCCTCTGCACTTTGGGCCT	325.562	22.7473		40.9946	1.80217	68.5581	3.0139	53.3098	2.34357		23.6344		55.4017	2.34411	51.6306	2.18455	9.2857	0.392889
osa-miR1320-5p	21	TGGAACGGAGGAATTTTATAG	403.099	25.0429		10.655	0.42547	110.719	4.42119	90.3701	3.60861		24.3434		28.932	1.18849	55.6167	2.28467	57.4194	2.35873
osa-miR166c-5p	20	GGAATGTTGTCTGGTCCGAG	319.209	36.1035		19.3234	0.535222	73.6908	2.0411	42.0492	1.16468		39.4694		45.7987	1.16036	28.8524	0.731007	33.9211	0.859428
osa-miR1432-3p	21	CAGGTGTCATCTCCCCTGAAC	227.301	15.6518		15.8922	1.01536	35.9288	2.29551	20.2406	1.29318		31.4337		47.2761	1.50399	28.2829	0.899764	32.5945	1.03693
osa-miR2118o	22	CTCCTGATGCCTCCCAAGCCTA	198.879	27.3385		10.655	0.389743	72.5909	2.65526	36.6327	1.33997		13.7079		13.2964	0.969981	13.4771	0.983163	11.1807	0.815639
osa-miR169r-3p	21	TGGCAAGTCTCCTCGGCTACC	302.031	39.0252		11.7385	0.300793	96.6046	2.47544	68.7041	1.76051		34.2699		14.8969	0.434693	17.0836	0.498502	19.7083	0.575091
osa-miR408-5p	21	CAGGGATGAGGCAGAGCATGG	115.973	6.8868		1.2642	0.183569	15.5814	2.2625	7.9822	1.15906		25.9978		12.5577	0.483029	19.5513	0.752037	26.1514	1.00591
osa-miR2863a	21	TTGTCCCATTCTAGTTTAGCT	119.329	12.3128		3.2507	0.26401	32.2626	2.62025	20.3832	1.65545		14.8897		9.1105	0.611866	12.3382	0.82864	14.7812	0.992713
osa-miR1861h	22	CGGTCTTGAGGCAGGAACTGAG	172.068	4.1738		0.7224	0.17308	9.5321	2.28379	10.2629	2.45889		52.941		13.2964	0.251155	19.5513	0.369304	61.5885	1.16334
osa-miR1861j	22	CGGTCTTGAGGCAGGAACTGAG	172.068	4.1738		0.7224	0.17308	9.5321	2.28379	10.2629	2.45889		52.941		13.2964	0.251155	19.5513	0.369304	61.5885	1.16334
osa-miR3980a-3p	21	CTGGCCGAGGCCGTCGATTCT	102.959	21.2865		9.3908	0.441162	60.1258	2.8246	12.1159	0.569182		0.01		0.01	1	0.01	1	0.01	1
osa-miR3980b-3p	21	CTGGCCGAGGCCGTCGATTCT	102.959	21.2865		9.3908	0.441162	60.1258	2.8246	12.1159	0.569182		0.01		0.01	1	0.01	1	0.01	1
miR160-x	21	TGCCTGGCTCCCTGTATGCTT	350.128	35.2688		31.062	0.880722	83.9561	2.38046	49.6038	1.40645		35.2152		43.3364	1.23062	32.2691	0.91634	39.4166	1.11931
miR6478-x	20	CCGACCTTAGCTCAGTTGGA	244.168	25.8777		7.4043	0.286127	61.409	2.37305	11.9733	0.462688		34.0335		25.731	0.756049	26.0051	0.764103	51.7344	1.5201
miR2679-x	21	CTTTTCACTTTCGACCGGGTA	114.725	15.2344		3.2507	0.213379	39.2284	2.57499	19.813	1.30054		9.6901		9.1105	0.940186	9.8705	1.01862	8.5276	0.880032
									in total:41
											zy22h≥2
osa-miR1320-3p	21	TGTAAAATTCATTCGTTCCAA	1063.23	88.0676		57.248	0.650046	204.758	2.32501	195.707	2.22223		115.808		65.9895	0.569816	138.567	1.19652	197.083	1.7018
osa-miR2877	24	TTGCATCCTCTGCACTTTGGGCCT	325.562	22.7473		40.9946	1.80217	68.5581	3.0139	53.3098	2.34357		23.6344		55.4017	2.34411	51.6306	2.18455	9.2857	0.392889
osa-miR1320-5p	21	TGGAACGGAGGAATTTTATAG	403.099	25.0429		10.655	0.42547	110.719	4.42119	90.3701	3.60861		24.3434		28.932	1.18849	55.6167	2.28467	57.4194	2.35873
osa-miR444a-3p.1	21	TTGCTGCCTCAAGCTTGCTGC	106.676	4.3825		24.5606	5.60424	5.1327	1.17118	12.5435	2.86218		6.1449		26.5928	4.32762	18.2225	2.96547	9.0961	1.48027
osa-miR444d.1	21	TTGCTGCCTCAAGCTTGCTGC	106.676	4.3825		24.5606	5.60424	5.1327	1.17118	12.5435	2.86218		6.1449		26.5928	4.32762	18.2225	2.96547	9.0961	1.48027
osa-miR1861h	22	CGGTCTTGAGGCAGGAACTGAG	172.068	4.1738		0.7224	0.17308	9.5321	2.28379	10.2629	2.45889		52.941		13.2964	0.251155	19.5513	0.369304	61.5885	1.16334
osa-miR1861j	22	CGGTCTTGAGGCAGGAACTGAG	172.068	4.1738		0.7224	0.17308	9.5321	2.28379	10.2629	2.45889		52.941		13.2964	0.251155	19.5513	0.369304	61.5885	1.16334
miR168-y	21	CTTGCCTTGCACCAAGTGAAT	857.7	85.3546		24.5606	0.287748	109.803	1.28643	229.631	2.69032		89.8107		101.2	1.12682	101.553	1.13074	115.786	1.28923
miR319-y	23	TTTGGATTGAAGGGAGCTCTTTC	146.335	8.765		23.6577	2.69911	17.0479	1.945	17.8174	2.03279		13.7079		31.7636	2.31717	20.1207	1.46782	13.4547	0.981529
											in total:9
																jn3h≥2
osa-miR159a.1	21	TTTGGATTGAAGGGAGCTCTG	2.12003e+06	136333		527497	3.86918	222304	1.63059	228660	1.67721		153260		382304	2.49448	354520	2.31319	115150	0.751339
osa-miR159b	21	TTTGGATTGAAGGGAGCTCTG	2.12003e+06	136333		527497	3.86918	222304	1.63059	228660	1.67721		153260		382304	2.49448	354520	2.31319	115150	0.751339
osa-miR393b-5p	22	TCCAAAGGGATCGCATTGATCT	155027	16582.4		19742.1	1.19054	14265	0.860253	19092.7	1.15139		12358.4		29929	2.42175	22405.6	1.81298	20651.7	1.67106
osa-miR393a	21	TCCAAAGGGATCGCATTGATC	153528	16312.9		19669.5	1.20576	13854.4	0.849289	18796.6	1.15225		12295.8		29857.9	2.42831	22293.4	1.81309	20447.4	1.66296
osa-miR444c.2	21	TGCAGTTGTTGTCTCAAGCTT	92251.2	9758.39		13862.1	1.42054	8036.33	0.82353	11402.2	1.16845		8441.96		19338	2.2907	13387.3	1.58581	8024.89	0.950595
osa-miR444b.2	21	TGCAGTTGTTGTCTCAAGCTT	92251.2	9758.39		13862.1	1.42054	8036.33	0.82353	11402.2	1.16845		8441.96		19338	2.2907	13387.3	1.58581	8024.89	0.950595
osa-miR171f-3p	21	TGATTGAGCCGTGCCAATATC	31666.8	2439.39		8012.19	3.28451	1080.98	0.443136	3518.16	1.44223		1960.24		6236.87	3.1817	5793.63	2.95558	2625.38	1.33932
osa-miR171e-3p	21	TGATTGAGCCGTGCCAATATC	31657.4	2436.67		8011.1	3.28772	1079.15	0.442877	3517.31	1.44349		1960		6237.24	3.18227	5790.22	2.95419	2625.76	1.33967
osa-miR171d-3p	21	TGATTGAGCCGTGCCAATATC	31656.7	2436.67		8010.74	3.28757	1079.15	0.442877	3517.31	1.44349		1960		6237.24	3.18227	5789.84	2.954	2625.76	1.33967
osa-miR171b	21	TGATTGAGCCGTGCCAATATC	31640.7	2438.76		7997.2	3.2792	1080.43	0.443025	3516.17	1.44178		1960.24		6233.43	3.17994	5790.59	2.95403	2623.86	1.33854
osa-miR171c-3p	21	TGATTGAGCCGTGCCAATATC	31640.7	2438.76		7997.2	3.2792	1080.43	0.443025	3516.17	1.44178		1960.24		6233.43	3.17994	5790.59	2.95403	2623.86	1.33854
osa-miR6251	21	TGTGTAGCCACATTGTAAGGG	23945	2327.95		4072.37	1.74934	1883.15	0.808931	2476.48	1.06381		1800.7		5241.74	2.91094	4150.38	2.30486	1992.25	1.10637
osa-miR444a-3p.2	21	TGCAGTTGCTGCCTCAAGCTT	21484.1	1162.41		3040.1	2.61535	776.136	0.667697	1446.49	1.24439		1996.16		6216.56	3.11426	4518.81	2.26375	2327.48	1.16598
osa-miR444e	21	TGCAGTTGCTGCCTCAAGCTT	21469.2	1162.2		3039.56	2.61535	775.769	0.667501	1447.06	1.24511		1996.4		6209.91	3.11056	4514.64	2.26139	2323.69	1.16394
osa-miR444d.2	21	TGCAGTTGCTGCCTCAAGCTT	21450.3	1162.41		3041.37	2.61643	777.236	0.668643	1447.06	1.24488		1990.49		6205.97	3.11781	4508.94	2.26525	2316.87	1.16397
osa-miR159f	21	CTTGGATTGAAGGGAGCTCTA	5647.45	292.167		1027.21	3.51584	869.441	2.97583	579.281	1.9827		375.787		1188.8	3.16349	1022.93	2.7221	291.835	0.776597
osa-miR160f-5p	21	TGCCTGGCTCCCTGAATGCCA	10092.3	569.1		832.714	1.46321	1223.05	2.14909	1015.59	1.78456		1129.49		2335.86	2.06807	2027.64	1.79519	958.886	0.848957
osa-miR160c-5p	21	TGCCTGGCTCCCTGTATGCCA	9326.09	758.174		1060.08	1.3982	1037.17	1.36798	1111.24	1.46568		881.09		2209.66	2.50788	1565.81	1.77713	702.867	0.797725
osa-miR160b-5p	21	TGCCTGGCTCCCTGTATGCCA	9326.09	758.174		1060.08	1.3982	1037.17	1.36798	1111.24	1.46568		881.09		2209.66	2.50788	1565.81	1.77713	702.867	0.797725
osa-miR160d-5p	21	TGCCTGGCTCCCTGTATGCCA	9297.67	756.922		1054.66	1.39336	1036.07	1.36879	1108.1	1.46396		880.381		2200.06	2.49899	1560.12	1.77209	701.351	0.796645
osa-miR160a-5p	21	TGCCTGGCTCCCTGTATGCCA	9260.4	753.165		1056.29	1.40246	1030.2	1.36783	1105.39	1.46767		869.509		2200.68	2.53094	1555.56	1.78901	689.602	0.793094
osa-miR160e-5p	21	TGCCTGGCTCCCTGTATGCCG	6260.35	440.546		1250.79	2.83917	438.295	0.99489	764.725	1.73586		484.032		1392.18	2.87622	1084.81	2.2412	404.968	0.836656
osa-miR528-5p	21	TGGAAGGGGCATGCAGAGGAG	4529.58	241.873		406.695	1.68144	531.6	2.19785	262.13	1.08375		596.532		1208.25	2.02546	996.736	1.67088	285.771	0.479054
osa-miR172d-3p	21	AGAATCTTGATGATGCTGCAT	2048.98	115.197		455.997	3.9584	101.737	0.883156	173.186	1.50338		138.261		408.495	2.95452	487.074	3.52285	169.037	1.22259
osa-miR172a	21	AGAATCTTGATGATGCTGCAT	2048.6	115.197		455.997	3.9584	101.737	0.883156	173.186	1.50338		138.261		408.495	2.95452	486.694	3.52011	169.037	1.22259
osa-miR7695-3p	21	ACGTGATGTGCCACGTAGGCA	2032.74	170.5		424.393	2.4891	142.249	0.834301	241.605	1.41703		181.748		412.312	2.26858	233.287	1.28357	226.646	1.24703
osa-miR444f	21	TGCAGTTGTTGCCTCAAGCTT	1840.59	66.3637		74.4043	1.12116	56.8262	0.856284	84.526	1.27368		288.812		622.222	2.15442	397.479	1.37626	249.955	0.865458
osa-miR7695-5p	24	TGCCTATGTGGCACGCCACGTGAA	1380.47	71.9984		324.887	4.51241	86.5225	1.20173	100.348	1.39375		102.1		256.079	2.50811	242.208	2.37225	196.325	1.92286
osa-miR2877	24	TTGCATCCTCTGCACTTTGGGCCT	325.562	22.7473		40.9946	1.80217	68.5581	3.0139	53.3098	2.34357		23.6344		55.4017	2.34411	51.6306	2.18455	9.2857	0.392889
osa-miR2876-3p	21	TTCCTATATGAACACTGTTGC	154.654	12.7301		7.9461	0.624198	25.2968	1.98716	19.9555	1.56758		13.2353		35.0877	2.65107	23.3476	1.76404	17.0553	1.28862
osa-miR5811	24	CCTAACCTAGGAGTTCGATGGGAC	106.716	13.1475		51.2884	3.901	5.6826	0.432219	15.6794	1.19258		2.1271		6.6482	3.12548	9.1113	4.28344	3.032	1.42541
osa-miR1864	24	TTGTAGTAACGTGATGGTCAATGT	105.883	10.4345		12.4609	1.1942	14.8481	1.42298	17.2473	1.65291		6.854		22.4069	3.26917	17.0836	2.4925	4.5481	0.663569
osa-miR444a-3p.1	21	TTGCTGCCTCAAGCTTGCTGC	106.676	4.3825		24.5606	5.60424	5.1327	1.17118	12.5435	2.86218		6.1449		26.5928	4.32762	18.2225	2.96547	9.0961	1.48027
osa-miR444d.1	21	TTGCTGCCTCAAGCTTGCTGC	106.676	4.3825		24.5606	5.60424	5.1327	1.17118	12.5435	2.86218		6.1449		26.5928	4.32762	18.2225	2.96547	9.0961	1.48027
miR159-y	20	TTTGGATTGAAGGGAGCTTG	9423.04	675.115		2084.4	3.08748	861.192	1.27562	918.097	1.35991		750.864		1830.35	2.43765	1704	2.26938	599.019	0.797773
miR7767-x	20	CCCAAGATGAGTGCTCTCCC	746.821	40.486		236.215	5.8345	74.0574	1.82921	70.8422	1.74979		56.2498		143.552	2.55204	94.3397	1.67716	31.0785	0.552509
miR319-y	23	TTTGGATTGAAGGGAGCTCTTTC	146.335	8.765		23.6577	2.69911	17.0479	1.945	17.8174	2.03279		13.7079		31.7636	2.31717	20.1207	1.46782	13.4547	0.981529
miR5073-x	25	GTTTGGTGAATCGGAAACTTTTTTC	107.995	8.3476		45.3288	5.43016	4.9494	0.592913	9.6927	1.16114		5.9086		16.4974	2.7921	15.3753	2.60219	1.895	0.320719
miR1425-x	23	TAGGATTCAATCCTTGCTGCTTT	119.364	14.191		15.3504	1.0817	5.316	0.374604	21.666	1.52674		8.5084		22.6531	2.66244	19.3615	2.27557	12.3177	1.44771
novel-m0267-5p	22	AATCGGTACTGCAGTAGCTCTT	148.154	7.7216		22.2129	2.87672	14.6648	1.89919	10.5479	1.36603		13.9443		34.4721	2.47213	34.3571	2.46388	10.2332	0.733863
novel-m0318-3p	22	TTAATTCATTGATTGTTTTCAG	147.978	12.1041		10.2938	0.850439	9.3488	0.772366	22.9489	1.89596		13.9443		27.9471	2.0042	21.4495	1.53823	29.9415	2.14722
novel-m0301-5p	21	CGCCGCGATGGCCTTGACGGC	166.83	2.0869		3.4313	1.64421	1.0999	0.52705	2.2806	1.09282		17.9621		52.3238	2.91301	56.9455	3.17031	30.6995	1.70913
																in total：42
																		jn10h≥2
osa-miR159a.1	21	TTTGGATTGAAGGGAGCTCTG	2.12003e+06	136333		527497	3.86918	222304	1.63059	228660	1.67721		153260		382304	2.49448	354520	2.31319	115150	0.751339
osa-miR159b	21	TTTGGATTGAAGGGAGCTCTG	2.12003e+06	136333		527497	3.86918	222304	1.63059	228660	1.67721		153260		382304	2.49448	354520	2.31319	115150	0.751339
osa-miR171f-3p	21	TGATTGAGCCGTGCCAATATC	31666.8	2439.39		8012.19	3.28451	1080.98	0.443136	3518.16	1.44223		1960.24		6236.87	3.1817	5793.63	2.95558	2625.38	1.33932
osa-miR171e-3p	21	TGATTGAGCCGTGCCAATATC	31657.4	2436.67		8011.1	3.28772	1079.15	0.442877	3517.31	1.44349		1960		6237.24	3.18227	5790.22	2.95419	2625.76	1.33967
osa-miR171d-3p	21	TGATTGAGCCGTGCCAATATC	31656.7	2436.67		8010.74	3.28757	1079.15	0.442877	3517.31	1.44349		1960		6237.24	3.18227	5789.84	2.954	2625.76	1.33967
osa-miR171b	21	TGATTGAGCCGTGCCAATATC	31640.7	2438.76		7997.2	3.2792	1080.43	0.443025	3516.17	1.44178		1960.24		6233.43	3.17994	5790.59	2.95403	2623.86	1.33854
osa-miR171c-3p	21	TGATTGAGCCGTGCCAATATC	31640.7	2438.76		7997.2	3.2792	1080.43	0.443025	3516.17	1.44178		1960.24		6233.43	3.17994	5790.59	2.95403	2623.86	1.33854
osa-miR6251	21	TGTGTAGCCACATTGTAAGGG	23945	2327.95		4072.37	1.74934	1883.15	0.808931	2476.48	1.06381		1800.7		5241.74	2.91094	4150.38	2.30486	1992.25	1.10637
osa-miR444a-3p.2	21	TGCAGTTGCTGCCTCAAGCTT	21484.1	1162.41		3040.1	2.61535	776.136	0.667697	1446.49	1.24439		1996.16		6216.56	3.11426	4518.81	2.26375	2327.48	1.16598
osa-miR444e	21	TGCAGTTGCTGCCTCAAGCTT	21469.2	1162.2		3039.56	2.61535	775.769	0.667501	1447.06	1.24511		1996.4		6209.91	3.11056	4514.64	2.26139	2323.69	1.16394
osa-miR444d.2	21	TGCAGTTGCTGCCTCAAGCTT	21450.3	1162.41		3041.37	2.61643	777.236	0.668643	1447.06	1.24488		1990.49		6205.97	3.11781	4508.94	2.26525	2316.87	1.16397
osa-miR169i-5p.2	22	TGGTGATAAGGGTGTAGCTCTG	17389.5	1945		3135.63	1.61215	2341.06	1.20363	2288.19	1.17645		1366.54		2003.2	1.46589	3183.82	2.32984	1126.03	0.823999
osa-miR159f	21	CTTGGATTGAAGGGAGCTCTA	5647.45	292.167		1027.21	3.51584	869.441	2.97583	579.281	1.9827		375.787		1188.8	3.16349	1022.93	2.7221	291.835	0.776597
osa-miR160e-5p	21	TGCCTGGCTCCCTGTATGCCG	6260.35	440.546		1250.79	2.83917	438.295	0.99489	764.725	1.73586		484.032		1392.18	2.87622	1084.81	2.2412	404.968	0.836656
osa-miR169j	21	TAGCCAAGGATGACTTGCCTG	4249.21	486.459		1014.57	2.08563	238.67	0.490628	584.127	1.20077		255.251		400.369	1.56853	852.094	3.33826	417.665	1.63629
osa-miR169i-5p.1	21	TAGCCAAGGATGACTTGCCTG	4249.21	486.459		1014.57	2.08563	238.67	0.490628	584.127	1.20077		255.251		400.369	1.56853	852.094	3.33826	417.665	1.63629
osa-miR169h	21	TAGCCAAGGATGACTTGCCTG	4249.21	486.459		1014.57	2.08563	238.67	0.490628	584.127	1.20077		255.251		400.369	1.56853	852.094	3.33826	417.665	1.63629
osa-miR169l	21	TAGCCAAGGATGACTTGCCTG	4246.78	485.832		1014.57	2.08831	238.67	0.49126	583.414	1.20086		254.542		400.369	1.5729	852.094	3.34755	417.286	1.63936
osa-miR169k	21	TAGCCAAGGATGACTTGCCTG	4246.78	485.832		1014.57	2.08831	238.67	0.49126	583.414	1.20086		254.542		400.369	1.5729	852.094	3.34755	417.286	1.63936
osa-miR169m	21	TAGCCAAGGATGACTTGCCTG	4176.2	476.441		984.051	2.06542	237.02	0.497481	577.143	1.21136		250.761		393.352	1.56863	844.312	3.367	413.117	1.64745
osa-miR172d-3p	21	AGAATCTTGATGATGCTGCAT	2048.98	115.197		455.997	3.9584	101.737	0.883156	173.186	1.50338		138.261		408.495	2.95452	487.074	3.52285	169.037	1.22259
osa-miR172a	21	AGAATCTTGATGATGCTGCAT	2048.6	115.197		455.997	3.9584	101.737	0.883156	173.186	1.50338		138.261		408.495	2.95452	486.694	3.52011	169.037	1.22259
osa-miR7695-5p	24	TGCCTATGTGGCACGCCACGTGAA	1380.47	71.9984		324.887	4.51241	86.5225	1.20173	100.348	1.39375		102.1		256.079	2.50811	242.208	2.37225	196.325	1.92286
osa-miR159a.2	21	TTGCATGCCCCAGGAGCTGCA	1038.36	87.2328		85.9622	0.985434	77.9069	0.893092	111.894	1.2827		112.972		182.949	1.61941	262.329	2.32206	117.113	1.03665
osa-miR2877	24	TTGCATCCTCTGCACTTTGGGCCT	325.562	22.7473		40.9946	1.80217	68.5581	3.0139	53.3098	2.34357		23.6344		55.4017	2.34411	51.6306	2.18455	9.2857	0.392889
osa-miR1320-5p	21	TGGAACGGAGGAATTTTATAG	403.099	25.0429		10.655	0.42547	110.719	4.42119	90.3701	3.60861		24.3434		28.932	1.18849	55.6167	2.28467	57.4194	2.35873
osa-miR5811	24	CCTAACCTAGGAGTTCGATGGGAC	106.716	13.1475		51.2884	3.901	5.6826	0.432219	15.6794	1.19258		2.1271		6.6482	3.12548	9.1113	4.28344	3.032	1.42541
osa-miR1864	24	TTGTAGTAACGTGATGGTCAATGT	105.883	10.4345		12.4609	1.1942	14.8481	1.42298	17.2473	1.65291		6.854		22.4069	3.26917	17.0836	2.4925	4.5481	0.663569
osa-miR444a-3p.1	21	TTGCTGCCTCAAGCTTGCTGC	106.676	4.3825		24.5606	5.60424	5.1327	1.17118	12.5435	2.86218		6.1449		26.5928	4.32762	18.2225	2.96547	9.0961	1.48027
osa-miR444d.1	21	TTGCTGCCTCAAGCTTGCTGC	106.676	4.3825		24.5606	5.60424	5.1327	1.17118	12.5435	2.86218		6.1449		26.5928	4.32762	18.2225	2.96547	9.0961	1.48027
miR159-y	20	TTTGGATTGAAGGGAGCTTG	9423.04	675.115		2084.4	3.08748	861.192	1.27562	918.097	1.35991		750.864		1830.35	2.43765	1704	2.26938	599.019	0.797773
miR5073-x	25	GTTTGGTGAATCGGAAACTTTTTTC	107.995	8.3476		45.3288	5.43016	4.9494	0.592913	9.6927	1.16114		5.9086		16.4974	2.7921	15.3753	2.60219	1.895	0.320719
miR1425-x	23	TAGGATTCAATCCTTGCTGCTTT	119.364	14.191		15.3504	1.0817	5.316	0.374604	21.666	1.52674		8.5084		22.6531	2.66244	19.3615	2.27557	12.3177	1.44771
novel-m0342-5p	21	TGAAGAAGGATGTGGACGGTG	1479.77	92.0327		143.752	1.56197	68.9247	0.748915	92.7933	1.00826		186.239		314.189	1.68702	383.053	2.05678	198.789	1.06739
novel-m0267-5p	22	AATCGGTACTGCAGTAGCTCTT	148.154	7.7216		22.2129	2.87672	14.6648	1.89919	10.5479	1.36603		13.9443		34.4721	2.47213	34.3571	2.46388	10.2332	0.733863
novel-m0301-5p	21	CGCCGCGATGGCCTTGACGGC	166.83	2.0869		3.4313	1.64421	1.0999	0.52705	2.2806	1.09282		17.9621		52.3238	2.91301	56.9455	3.17031	30.6995	1.70913
																		in total：36
																				jn22h≥2
osa-miR169a	21	CAGCCAAGGATGACTTGCCGA	13308.5	1777		1575.13	0.886398	1739.07	0.978651	2254.83	1.2689		994.535		779.563	0.783847	1697.16	1.70649	2491.21	2.5049
osa-miR1320-5p	21	TGGAACGGAGGAATTTTATAG	403.099	25.0429		10.655	0.42547	110.719	4.42119	90.3701	3.60861		24.3434		28.932	1.18849	55.6167	2.28467	57.4194	2.35873
osa-miR3981-3p	21	AGTATTAGGATACGTCTCATC	161.254	22.5386		10.8356	0.480757	21.6306	0.959714	24.8019	1.10042		18.1985		9.9723	0.547974	15.9447	0.876155	37.3321	2.05138
novel-m0318-3p	22	TTAATTCATTGATTGTTTTCAG	147.978	12.1041		10.2938	0.850439	9.3488	0.772366	22.9489	1.89596		13.9443		27.9471	2.0042	21.4495	1.53823	29.9415	2.14722
																				in total：4
							zy3h≤0.5
osa-miR396f-5p	22	TCTCCACAGGCTTTCTTGAACT	952996	140559		45459	0.323417	144074	1.02501	115538	0.821989		180759		87375.8	0.483383	88992.1	0.492325	150239	0.831159
osa-miR396e-5p	21	TCCACAGGCTTTCTTGAACTG	951842	140408		45273	0.32244	143933	1.0251	115407	0.821942		180581		87274.6	0.483298	88884.5	0.492213	150082	0.831103
osa-miR167f	21	TGAAGCTGCCAGCATGATCTG	702086	155613		53458	0.343532	121028	0.777751	77960.9	0.500993		117708		34193.9	0.290497	44543.9	0.378426	97579.7	0.828995
osa-miR167j	21	TGAAGCTGCCAGCATGATCTG	702077	155616		53456	0.343512	121035	0.777781	77964.6	0.501005		117711		34184.7	0.290412	44528.5	0.378287	97580.7	0.828986
osa-miR167d-5p	21	TGAAGCTGCCAGCATGATCTG	702077	155616		53456	0.343512	121035	0.777781	77964.6	0.501005		117711		34184.7	0.290412	44528.5	0.378287	97580.7	0.828986
osa-miR167h-5p	21	TGAAGCTGCCAGCATGATCTG	701936	155592		53440	0.343461	121011	0.777746	77941.1	0.500931		117692		34177.3	0.290396	44519.4	0.378271	97562.5	0.828965
osa-miR167g	21	TGAAGCTGCCAGCATGATCTG	701888	155589		53424.6	0.34337	121002	0.777698	77937.4	0.500917		117690		34167.3	0.290317	44514.5	0.378236	97563.4	0.82899
osa-miR166c-3p	21	TCGGACCAGGCTTCATTCCCC	127959	16568		2788.72	0.16832	36340.2	2.1934	17358.3	1.0477		20102		10689.2	0.531748	10552.8	0.524961	13560.1	0.674564
osa-miR166j-3p	21	TCGGACCAGGCTTCATTCCCC	127875	16556.5		2783.48	0.16812	36322.8	2.19387	17344.1	1.04757		20090.4		10682.2	0.531705	10547.2	0.524989	13548.3	0.674368
osa-miR166a-3p	21	TCGGACCAGGCTTCATTCCCC	121645	15683.3		2463.47	0.157076	33358.1	2.12698	16739.3	1.06733		19340.3		10250	0.529985	10365.8	0.535969	13444.7	0.695166
osa-miR166d-3p	21	TCGGACCAGGCTTCATTCCCC	121645	15683.3		2463.47	0.157076	33358.1	2.12698	16739.3	1.06733		19340.3		10250	0.529985	10365.8	0.535969	13444.7	0.695166
osa-miR166f	21	TCGGACCAGGCTTCATTCCCC	121645	15683.3		2463.47	0.157076	33358.1	2.12698	16739.3	1.06733		19340.3		10250	0.529985	10365.8	0.535969	13444.7	0.695166
osa-miR166b-3p	21	TCGGACCAGGCTTCATTCCCC	121542	15670.6		2463.29	0.157192	33333.3	2.12713	16724.3	1.06724		19322.8		10243.2	0.530108	10350	0.535639	13434.1	0.695246
osa-miR156d	20	TGACAGAAGAGAGTGAGCAC	115354	19649.5		2292.45	0.116667	19343.6	0.984434	20762.9	1.05666		16583.5		8307.91	0.500973	10123.4	0.610448	18290.8	1.10295
osa-miR156f-5p	20	TGACAGAAGAGAGTGAGCAC	115040	19600.5		2286.67	0.116664	19299.6	0.984653	20711.6	1.05669		16524.9		8285.01	0.501365	10094.2	0.610844	18238	1.10366
osa-miR156j-5p	20	TGACAGAAGAGAGTGAGCAC	115040	19600.5		2286.67	0.116664	19299.6	0.984653	20711.6	1.05669		16524.9		8285.01	0.501365	10094.2	0.610844	18238	1.10366
osa-miR156h-5p	20	TGACAGAAGAGAGTGAGCAC	115040	19600.5		2286.67	0.116664	19299.6	0.984653	20711.6	1.05669		16524.9		8285.01	0.501365	10094.2	0.610844	18238	1.10366
osa-miR168a-3p	24	GATCCCGCCTTGCACCAAGTGAAT	117251	13665.9		3580.25	0.261984	26532	1.94147	26390.3	1.93111		13899.9		8066.73	0.580346	9625.87	0.692516	15490.2	1.11441
osa-miR396c-5p	21	TTCCACAGCTTTCTTGAACTT	89736.5	12457.8		2032.93	0.163186	13290.6	1.06685	11424	0.917014		17388.8		6863.9	0.394732	11094.7	0.638038	15183.9	0.873204
osa-miR5794	21	TGAGGAATCACTAGTAGTCGT	59124.6	9965.82		2430.78	0.243912	13150.5	1.31956	12017.2	1.20584		6218.21		3443.52	0.55378	4340.38	0.698012	7558.14	1.21549
osa-miR5788	21	TGGATGTGACATACTCTAGTA	41553.5	6947.74		2262.83	0.325693	4550.68	0.654987	4837.65	0.696292		6096.96		4382.03	0.718723	4500.78	0.7382	7974.86	1.30801
osa-miR156b-5p	20	TGACAGAAGAGAGTGAGCAC	46533.7	7512.87		830.186	0.110502	7137.56	0.950044	7936.75	1.05642		7212.5		3581.04	0.496504	4561.14	0.632394	7761.67	1.07614
osa-miR156c-5p	20	TGACAGAAGAGAGTGAGCAC	46529.9	7511.83		830.186	0.110517	7137.19	0.950127	7936.03	1.05647		7211.56		3581.04	0.49657	4561.14	0.632477	7760.91	1.07618
osa-miR156g-5p	20	TGACAGAAGAGAGTGAGCAC	46529.9	7511.83		830.186	0.110517	7137.19	0.950127	7936.03	1.05647		7211.56		3581.04	0.49657	4561.14	0.632477	7760.91	1.07618
osa-miR156a	20	TGACAGAAGAGAGTGAGCAC	46290.3	7466.13		824.226	0.110395	7099.61	0.95091	7893.98	1.05731		7181.07		3565.04	0.496449	4538.17	0.631963	7722.06	1.07534
osa-miR156i	20	TGACAGAAGAGAGTGAGCAC	46290.3	7466.13		824.226	0.110395	7099.61	0.95091	7893.98	1.05731		7181.07		3565.04	0.496449	4538.17	0.631963	7722.06	1.07534
osa-miR156e	20	TGACAGAAGAGAGTGAGCAC	46290.3	7466.13		824.226	0.110395	7099.61	0.95091	7893.98	1.05731		7181.07		3565.04	0.496449	4538.17	0.631963	7722.06	1.07534
osa-miR167b	21	TGAAGCTGCCAGCATGATCTA	42515.4	7967.4		1455.94	0.182737	4809.88	0.603695	6559.67	0.823314		7251.74		3124.04	0.430799	6298.17	0.868505	5048.55	0.696185
osa-miR167c-5p	21	TGAAGCTGCCAGCATGATCTA	42146.6	7853.46		1438.96	0.183227	4766.62	0.606945	6542.57	0.833081		7176.11		3124.53	0.435407	6291.15	0.876679	4953.23	0.690239
osa-miR167a-5p	21	TGAAGCTGCCAGCATGATCTA	42146.6	7853.46		1438.96	0.183227	4766.62	0.606945	6542.57	0.833081		7176.11		3124.53	0.435407	6291.15	0.876679	4953.23	0.690239
osa-miR166l-3p	21	TCGGACCAGGCTTCAATCCCT	31161.4	5333.72		707.744	0.132692	6290.48	1.17938	4564.26	0.855736		5153.95		2299.17	0.446098	2491.36	0.483389	4320.67	0.838322
osa-miR166k-3p	21	TCGGACCAGGCTTCAATCCCT	30942.7	5297.2		701.423	0.132414	6245.2	1.17896	4529.34	0.855044		5122.75		2279.72	0.445018	2475.42	0.483221	4291.68	0.837768
osa-miR166g-3p	21	TCGGACCAGGCTTCATTCCTC	19875.9	2696.08		392.97	0.145756	5034.07	1.86718	2709.82	1.0051		3340.25		1665.37	0.498578	1594.28	0.477295	2443.07	0.731405
osa-miR393b-3p	21	TCAGTGCAATCCCTTTGGAAT	16857	2209.83		689.504	0.312017	4814.46	2.17866	1852.73	0.838404		2255.19		1406.34	0.623601	1140.05	0.505521	2488.93	1.10365
osa-miR156h-3p	22	GCTCACTTCTCTTTCTGTCAGC	8225.56	1237.75		315.135	0.254604	1003.99	0.811145	526.399	0.425288		1451.39		1051.4	0.724411	1090.51	0.751354	1549	1.06725
osa-miR156f-3p	22	GCTCACTTCTCTTTCTGTCAGC	8225.56	1237.75		315.135	0.254604	1003.99	0.811145	526.399	0.425288		1451.39		1051.4	0.724411	1090.51	0.751354	1549	1.06725
osa-miR156l-3p	22	GCTCACTTCTCTTTCTGTCAGC	7933.22	1174.93		307.911	0.262068	970.628	0.826116	513.855	0.43735		1386.87		999.077	0.720385	1061.08	0.765095	1518.87	1.09518
osa-miR1862d	24	ACTAGGTTTGTTTATTTTGGGACG	13770.2	2716.11		326.512	0.120213	3609.93	1.32908	2728.49	1.00456		1662.21		745.583	0.44855	868.798	0.522678	1112.57	0.669335
osa-miR827	21	TTAGATGACCATCAGCAAACA	2927.47	273.385		60.8598	0.222616	161.68	0.591399	416.786	1.52454		564.862		439.397	0.777884	498.083	0.881779	512.416	0.907154
osa-miR156g-3p	22	GCTCACTTCTCTCTCTGTCAGC	10046.6	1568.52		451.121	0.287609	2043.18	1.30261	1095.99	0.698739		1413.81		879.902	0.622362	1098.48	0.776964	1495.56	1.05782
osa-miR156c-3p	22	GCTCACTTCTCTCTCTGTCAGC	10034.1	1566.02		450.579	0.287723	2040.61	1.30306	1095.42	0.699492		1410.74		878.424	0.622671	1097.72	0.778118	1494.61	1.05945
osa-miR1871	24	ATGGCTCTGATATCATGTTGGTTT	7939.13	1127.35		450.76	0.399841	1140.74	1.01188	975.826	0.865594		1310.76		982.949	0.749906	1024.07	0.781277	926.67	0.70697
osa-miR162a	21	TCGATAAACCTCTGCATCCAG	12777.1	1821.45		209.668	0.11511	2789.43	1.53143	2206.8	1.21156		1885.79		897.753	0.476063	1208.95	0.641086	1757.26	0.931845
osa-miR166h-3p	21	TCGGACCAGGCTTCATTCCTC	9774.01	1288.87		177.162	0.137454	2692.28	2.08886	1129.2	0.876112		1658.42		828.932	0.499831	838.997	0.5059	1160.14	0.699542
osa-miR164a	21	TGGAGAAGCAGGGCACGTGCA	6694.94	812.016		347.641	0.428121	922.051	1.13551	830.008	1.02216		1185.74		862.542	0.727431	937.702	0.790818	797.24	0.672358
osa-miR164b	21	TGGAGAAGCAGGGCACGTGCA	6694.94	812.016		347.641	0.428121	922.051	1.13551	830.008	1.02216		1185.74		862.542	0.727431	937.702	0.790818	797.24	0.672358
osa-miR164f	21	TGGAGAAGCAGGGCACGTGCA	6694.94	812.016		347.641	0.428121	922.051	1.13551	830.008	1.02216		1185.74		862.542	0.727431	937.702	0.790818	797.24	0.672358
osa-miR1432-5p	21	ATCAGGAGAGATGACACCGAC	10589.8	975.212		203.348	0.208516	997.025	1.02237	1409.57	1.4454		1694.35		984.795	0.581223	1795.49	1.05969	2530.06	1.49323
osa-miR820b	21	TCGGCCTCGTGGATGGACCAG	7434.58	1193.09		474.418	0.397639	913.986	0.766069	828.155	0.694129		1048.66		998.953	0.952602	942.258	0.898537	1035.07	0.987039
osa-miR820c	21	TCGGCCTCGTGGATGGACCAG	7434.58	1193.09		474.418	0.397639	913.986	0.766069	828.155	0.694129		1048.66		998.953	0.952602	942.258	0.898537	1035.07	0.987039
osa-miR820a	21	TCGGCCTCGTGGATGGACCAG	7434.58	1193.09		474.418	0.397639	913.986	0.766069	828.155	0.694129		1048.66		998.953	0.952602	942.258	0.898537	1035.07	0.987039
osa-miR2873a	24	AAGTTTGGACTTAAATTTGGTAAC	3932.81	535.083		150.253	0.280804	713.994	1.33436	492.902	0.921168		614.494		476.7	0.775761	442.276	0.719741	507.11	0.825249
osa-miR2871a-3p	21	TATTTTAGTTTCTATGGTCAC	5775.08	699.532		287.685	0.411253	1160.9	1.65954	905.697	1.29472		671.216		821.545	1.22396	657.151	0.979044	571.352	0.851219
osa-miR2871b	21	TATTTTAGTTTCTATGGTCAC	5761.29	699.323		287.323	0.410859	1158.34	1.65637	903.701	1.29225		669.798		818.098	1.22141	655.253	0.978283	569.457	0.850191
osa-miR1863a	24	AGCTCTGATACCATGTTAGATTAG	3438.6	749.2		72.0566	0.096178	384.952	0.513817	398.826	0.532335		583.06		306.802	0.526193	326.677	0.56028	617.022	1.05825
osa-miR1862e	24	CTAGATTTGTTTATTTTGGGACGG	4334.47	762.765		115.941	0.152	749.189	0.982202	688.894	0.903153		635.056		384.364	0.605245	434.304	0.683883	563.961	0.88805
osa-miR166m	21	TCGGACCAGGCTTCATTCCCT	4838.98	714.349		120.636	0.168876	1041.57	1.45807	490.906	0.687208		890.543		441.49	0.495753	457.462	0.513688	682.022	0.765849
osa-miR395d	21	GTGAAGTGTTTGGGGGAACTC	6259.46	909.475		264.569	0.290903	741.124	0.814892	738.07	0.811534		1685.84		585.78	0.347471	644.053	0.382037	690.549	0.409617
osa-miR395y	21	GTGAAGTGTTTGGGGGAACTC	6260.55	910.101		264.569	0.290702	741.49	0.814734	737.785	0.810663		1685.84		585.78	0.347471	644.433	0.382262	690.549	0.409617
osa-miR395s	21	GTGAAGTGTTTGGGGGAACTC	6260.55	910.101		264.569	0.290702	741.49	0.814734	737.785	0.810663		1685.84		585.78	0.347471	644.433	0.382262	690.549	0.409617
osa-miR395g	21	GTGAAGTGTTTGGGGGAACTC	6260.55	910.101		264.569	0.290702	741.49	0.814734	737.785	0.810663		1685.84		585.78	0.347471	644.433	0.382262	690.549	0.409617
osa-miR395e	21	GTGAAGTGTTTGGGGGAACTC	6258.05	909.058		264.569	0.291036	741.124	0.815266	737.785	0.811593		1685.13		585.78	0.347617	644.053	0.382198	690.549	0.40979
osa-miR395k	21	GTGAAGTGTTTGGGGGAACTC	6258.81	910.518		264.569	0.290569	741.124	0.813958	737.927	0.810448		1685.37		586.027	0.347714	643.104	0.381581	690.17	0.409507
osa-miR395i	21	GTGAAGTGTTTGGGGGAACTC	6258.81	910.518		264.569	0.290569	741.124	0.813958	737.927	0.810448		1685.37		586.027	0.347714	643.104	0.381581	690.17	0.409507
osa-miR395j	21	GTGAAGTGTTTGGGGGAACTC	6254.4	909.058		264.569	0.291036	741.124	0.815266	736.645	0.810339		1683.95		585.78	0.347861	643.104	0.381902	690.17	0.409852
osa-miR395b	21	GTGAAGTGTTTGGGGGAACTC	6253.59	908.849		264.569	0.291103	740.207	0.814445	737.215	0.811152		1684.19		585.288	0.34752	643.104	0.381849	690.17	0.409795
osa-miR395h	21	GTGAAGTGTTTGGGGGAACTC	6250.84	907.805		264.569	0.291438	740.207	0.815381	736.217	0.810985		1683.48		585.288	0.347666	643.104	0.382009	690.17	0.409967
osa-miR2878-5p	24	TACATGTATAAAATTCTGAGGATG	2977.14	523.814		170.66	0.325803	385.868	0.736651	328.411	0.626961		433.218		337.95	0.780092	328.196	0.757576	469.02	1.08264
osa-miR395r	21	GTGAAGTGTTTGGGGGAACTC	6089.41	861.059		248.857	0.289013	702.629	0.816006	694.453	0.806511		1672.61		581.841	0.347865	640.257	0.38279	687.707	0.411159
osa-miR395q	21	GTGAAGTGTTTGGGGGAACTC	6089.41	861.059		248.857	0.289013	702.629	0.816006	694.453	0.806511		1672.61		581.841	0.347865	640.257	0.38279	687.707	0.411159
osa-miR395n	21	GTGAAGTGTTTGGGGGAACTC	6090.49	861.685		248.857	0.288803	702.995	0.815838	694.168	0.805594		1672.61		581.841	0.347865	640.636	0.383017	687.707	0.411159
osa-miR395l	21	GTGAAGTGTTTGGGGGAACTC	6090.49	861.685		248.857	0.288803	702.995	0.815838	694.168	0.805594		1672.61		581.841	0.347865	640.636	0.383017	687.707	0.411159
osa-miR395p	21	GTGAAGTGTTTGGGGGAACTC	6088	860.641		248.857	0.289153	702.629	0.816401	694.168	0.80657		1671.9		581.841	0.348012	640.257	0.382953	687.707	0.411333
osa-miR395m	21	GTGAAGTGTTTGGGGGAACTC	6084.43	859.389		248.857	0.289574	701.712	0.816524	693.74	0.807248		1671.42		581.348	0.347816	640.257	0.383061	687.707	0.41145
osa-miR5144-5p	21	TTCTTGTGCTGCTGAAGAGAC	3693.6	861.893		354.143	0.410889	586.593	0.680587	591.112	0.685829		405.566		229.609	0.566145	286.625	0.70673	378.059	0.932176
osa-miR169e	21	TAGCCAAGGATGACTTGCCGG	4969.21	1311		571.396	0.435849	357.455	0.272659	636.867	0.485789		457.562		495.906	1.0838	638.738	1.39596	500.288	1.09338
osa-miR396f-3p	24	ATAGTTCAAGAAAGTCCTTGGAAA	2926.28	574.526		153.323	0.266869	318.227	0.553895	171.333	0.298216		615.676		305.079	0.495518	213.735	0.347156	574.384	0.932933
osa-miR535-5p	21	TGACAACGAGAGAGAGCACGC	1973.89	392.548		24.9218	0.0634873	378.719	0.964773	258.424	0.658326		282.431		128.901	0.456399	159.827	0.565897	348.117	1.23257
osa-miR810b.2	21	AAGTGATTTAATTATGCCGTT	2581.49	452.233		103.48	0.228819	326.842	0.72273	441.303	0.97583		340.571		226.654	0.665512	257.963	0.757442	432.446	1.26977
osa-miR810b.1	21	TGAACACCGATATGCGTCATC	3196.04	614.595		92.4636	0.150446	390.268	0.635	425.623	0.692527		563.207		222.345	0.394784	284.158	0.504535	603.378	1.07132
osa-miR156b-3p	21	GCTCACTCTCTATCTGTCAGC	2164.58	822.659		115.399	0.140275	320.976	0.390169	238.754	0.290222		147.006		139.243	0.947192	128.507	0.874162	252.039	1.71448
osa-miR408-3p	21	CTGCACTGCCTCTTCCCTGGC	1562.34	64.9029		31.062	0.478592	216.123	3.32994	84.0984	1.29576		456.616		300.031	0.657074	219.81	0.481388	189.693	0.415431
osa-miR5339	21	CAGATAGAGAATCTTCTCAGA	1310.3	204.308		83.2533	0.407488	133.083	0.651384	152.375	0.745808		189.548		134.934	0.711873	151.095	0.797136	261.704	1.38068
osa-miR5150-3p	24	AGAAGCTGCAGCTGTCAGAAGCTC	1442.52	271.298		92.6442	0.341485	191.376	0.705408	221.934	0.818045		209.873		112.896	0.537926	155.082	0.738929	187.419	0.893008
osa-miR156j-3p	22	GCTCGCTCCTCTTTCTGTCAGC	1790.4	369.383		98.4231	0.266453	717.66	1.94286	358.915	0.97166		87.6836		42.4746	0.484408	43.6582	0.497906	72.2007	0.823423
osa-miR1423-5p	24	AGGCAACTACACGTTGGGCGCTCG	1636.39	242.29		56.1644	0.231806	209.524	0.864764	239.181	0.98717		285.031		163.496	0.57361	180.517	0.633325	260.188	0.912842
osa-miR1883a	24	ACCTGTGACGGGCCGAGAATGGAA	1417.6	334.323		60.1374	0.179878	174.328	0.521437	178.745	0.534647		211.291		121.022	0.572772	147.109	0.696238	190.64	0.902262
osa-miR399b	21	TGCCAAAGGAGAATTGCCCTG	148.65	26.7124		5.2372	0.196059	19.4309	0.727411	28.2228	1.05654		24.5798		10.711	0.435764	14.9956	0.610078	18.7608	0.763261
osa-miR399a	21	TGCCAAAGGAGAATTGCCCTG	148.65	26.7124		5.2372	0.196059	19.4309	0.727411	28.2228	1.05654		24.5798		10.711	0.435764	14.9956	0.610078	18.7608	0.763261
osa-miR399c	21	TGCCAAAGGAGAATTGCCCTG	148.65	26.7124		5.2372	0.196059	19.4309	0.727411	28.2228	1.05654		24.5798		10.711	0.435764	14.9956	0.610078	18.7608	0.763261
osa-miR167h-3p	21	AGGTCATGCTGTAGTTTCATC	1530.45	368.757		27.6307	0.0749293	276.432	0.749632	66.4234	0.180128		451.889		158.202	0.350091	83.1404	0.183984	97.9731	0.216808
osa-miR2090	22	AACTCTGATTCTAGAATTTTTG	861.508	115.197		29.4366	0.255532	136.2	1.18231	131.849	1.14455		114.863		117.944	1.02682	105.159	0.915519	110.859	0.965143
osa-miR2878-3p	24	CAGGATTTTATACATGTAAAGAAT	913.919	179.057		33.2291	0.185579	104.853	0.585588	96.7844	0.540523		171.113		79.5322	0.464794	92.6313	0.541346	156.719	0.915881
osa-miR1876	24	ATAAGTGGGTTTGTGGGCTGGCCC	999.185	241.664		41.8976	0.173371	182.76	0.756258	251.297	1.03986		112.972		57.6177	0.510016	70.0429	0.620001	40.9327	0.362325
osa-miR535-3p	21	GTGCTTTCTCCCGTTGTCACT	945.571	146.918		31.6038	0.215111	258.651	1.76051	113.889	0.775186		135.661		80.394	0.592608	78.9644	0.58207	99.4891	0.733363
osa-miR166j-5p	21	GAATGACGTCCGGTCTGAAGA	1064.8	224.551		86.6846	0.386035	75.5239	0.336332	76.9714	0.342779		275.341		138.381	0.502581	71.5615	0.259902	115.786	0.420521
osa-miR1425-3p	21	CAGCAAGAACTGGATCTTAAT	948.438	146.918		33.2291	0.226174	85.4226	0.581429	123.297	0.839219		175.131		89.7507	0.512478	121.863	0.695842	172.827	0.986844
osa-miR1862b	24	ACGAGGTTGGTTTATTTTGGGACG	880.803	150.257		18.9623	0.126199	198.892	1.32367	147.956	0.984684		147.242		62.9117	0.427267	82.1913	0.558205	72.3902	0.49164
osa-miR1862c	24	ACGAGGTTGGTTTATTTTGGGACG	880.803	150.257		18.9623	0.126199	198.892	1.32367	147.956	0.984684		147.242		62.9117	0.427267	82.1913	0.558205	72.3902	0.49164
osa-miR1862a	24	ACGAGGTTGGTTTATTTTGGGACG	880.803	150.257		18.9623	0.126199	198.892	1.32367	147.956	0.984684		147.242		62.9117	0.427267	82.1913	0.558205	72.3902	0.49164
osa-miR166i-3p	21	TCGGATCAGGCTTCATTCCTC	989.334	145.875		18.2399	0.125038	259.567	1.77938	110.896	0.760212		191.202		76.5774	0.400505	76.3069	0.39909	110.67	0.578811
osa-miR1878	24	ACTTAATCTGGACACTATAAAAGA	818.717	165.909		10.4744	0.0631333	123.918	0.746901	170.335	1.02667		105.646		51.0926	0.483622	80.4829	0.761819	110.859	1.04935
osa-miR1883b	24	ACCTGTGACGGGCCGAGAATGGAA	819.303	202.43		22.7547	0.112408	82.123	0.405686	76.2587	0.376716		131.643		72.1453	0.548035	111.613	0.847844	120.335	0.914094
osa-miR166i-5p	21	AATGCAGTTTGATCCAAGATC	793.106	77.8417		25.4636	0.32712	48.0273	0.616987	67.9914	0.873457		178.203		83.4718	0.468408	111.044	0.62313	201.063	1.12828
osa-miR1857-3p	21	TCATGCTCCAAGAAAACCAGG	794.759	102.467		13.5445	0.132184	223.822	2.18433	131.992	1.28814		106.355		54.0474	0.508181	76.8764	0.72283	85.6554	0.805375
osa-miR399k	21	TGCCAAAGGAAATTTGCCCCG	259.252	58.4334		9.3908	0.160709	21.4473	0.367038	57.8711	0.990377		32.6154		15.02	0.460519	26.1949	0.803145	38.2796	1.17367
osa-miR166d-5p	21	GGAATGTTGTCTGGCTCGAGG	451.373	66.5724		18.7817	0.282124	91.1052	1.36851	27.0825	0.406813		94.0648		62.5423	0.664885	43.848	0.466147	47.3758	0.503651
osa-miR1849	21	TATCGTATCCTAGGTTGGTTT	625.24	108.519		23.8383	0.219669	114.936	1.05913	88.232	0.813054		93.5922		45.1831	0.482766	57.3251	0.612499	93.6145	1.00024
osa-miR530-5p	20	TGCATTTGCACCTGCACCTA	413.158	41.1121		13.9057	0.338239	65.2585	1.58733	47.4657	1.15454		54.3591		74.6076	1.3725	56.7556	1.04409	59.6935	1.09813
osa-miR1860-3p	22	ATCTGGAAGCTAGGTTTTCTCT	675.888	128.136		25.1024	0.195904	92.9384	0.725309	118.45	0.92441		96.4283		48.1379	0.499209	73.2698	0.759837	93.425	0.968855
osa-miR5827	21	TTTGTTGCAATTTGGACTACC	421.92	49.6684		20.7682	0.418137	44.3611	0.893145	63.145	1.27133		47.7415		84.703	1.7742	63.0197	1.32002	48.5128	1.01616
osa-miR167e-3p	21	AGATCATGTTGCAGCTTCACT	589.131	83.059		5.4178	0.0652283	134.733	1.62214	42.6193	0.513121		152.678		30.5325	0.19998	29.0422	0.190219	111.049	0.727339
osa-miR167i-3p	21	AGATCATGTTGCAGCTTCACT	589.131	83.059		5.4178	0.0652283	134.733	1.62214	42.6193	0.513121		152.678		30.5325	0.19998	29.0422	0.190219	111.049	0.727339
osa-miR396e-3p	24	ATGGTTCAAGAAAGCCCATGGAAA	587.804	99.9629		12.0997	0.121042	48.9439	0.489621	39.4835	0.394982		164.732		33.3641	0.202536	56.7556	0.344534	132.463	0.804112
osa-miR1870-3p	24	TTTAGGGCTAATTCAGCATGAACA	555.2	131.475		13.3639	0.101646	63.792	0.485201	74.8333	0.569181		89.5743		34.8415	0.388968	45.936	0.512826	101.384	1.13184
osa-miR5150-5p	24	AGCTTCTGACAGCTGCAGTTTCTC	404.653	59.6856		16.7951	0.281393	68.0081	1.13944	66.4234	1.11289		53.8864		36.6882	0.680843	45.936	0.85246	57.2299	1.06205
osa-miR812h	24	AAGACGGATGATTAAAGTTGGACA	475.611	2.2956		0.903	0.393361	1.0999	0.479134	4.4187	1.92486		158.587		67.4669	0.425426	103.261	0.651133	137.579	0.867534
osa-miR812j	24	AAGACGGATGATTAAAGTTGGACA	475.611	2.2956		0.903	0.393361	1.0999	0.479134	4.4187	1.92486		158.587		67.4669	0.425426	103.261	0.651133	137.579	0.867534
osa-miR812i	24	AAGACGGATGATTAAAGTTGGACA	475.611	2.2956		0.903	0.393361	1.0999	0.479134	4.4187	1.92486		158.587		67.4669	0.425426	103.261	0.651133	137.579	0.867534
osa-miR530-3p	21	AGGTGCAGAGGCAGATGCAAC	364.053	56.3465		27.9919	0.496782	22.5472	0.400153	24.9444	0.442697		49.6322		55.8941	1.12617	65.4873	1.31945	61.2095	1.23326
osa-miR1873	24	TCAACATGGTATCAGAGCTGGAAG	499.716	91.4066		4.6954	0.0513683	60.6757	0.6638	75.8311	0.829602		93.1195		33.4872	0.359615	47.6444	0.511648	92.8565	0.997176
osa-miR1320-5p	21	TGGAACGGAGGAATTTTATAG	403.099	25.0429		10.655	0.42547	110.719	4.42119	90.3701	3.60861		24.3434		28.932	1.18849	55.6167	2.28467	57.4194	2.35873
osa-miR1437a	22	TCCGGCGCCGCACTAGGCACTG	374.732	60.103		20.9488	0.348548	62.8755	1.04613	52.5971	0.875116		47.5051		45.1831	0.951121	32.0793	0.675281	53.4399	1.12493
osa-miR2869	21	TCCCGACATTAAATTCTGGGC	309.704	51.338		20.2264	0.393985	37.5786	0.731984	51.0292	0.993985		31.1974		35.4571	1.13654	39.1026	1.25339	43.7752	1.40317
osa-miR1863c	24	TAGAAACTTGGCTGATGCATTACT	276.694	50.5032		5.9596	0.118004	68.0081	1.34661	49.4612	0.979368		41.3602		15.5125	0.375059	17.8429	0.431403	28.0465	0.678104
osa-miR2864.1	21	TTTTGCTGCCCTTGTTTTGCA	369.397	47.5815		15.531	0.326408	64.5252	1.3561	65.5682	1.37802		52.232		33.1179	0.634054	41.9498	0.803144	48.8918	0.936051
osa-miR5542	21	TTTGAGAAGGTATCATGAGAT	387.768	122.919		24.1994	0.196873	94.2215	0.766534	146.388	1.19093		0.01		0.01	1	0.01	1	0.01	1
osa-miR2871a-5p	24	GACCGTAGAAACTAGCATAGAAAA	351.311	68.2419		8.3073	0.121733	66.725	0.977772	48.3209	0.708083		54.5954		30.04	0.55023	22.5884	0.413742	52.4924	0.96148
osa-miR390-5p	21	AAGCTCAGGAGGGATAGCGCC	331.073	44.2425		4.1536	0.0938826	47.4774	1.07312	52.7396	1.19206		56.4862		31.148	0.551427	44.4175	0.786343	50.4078	0.892391
osa-miR1423-3p	21	AGCGCCCAAGCGGTAGTTGTC	275.601	36.1035		10.4744	0.290121	31.3461	0.868229	44.0447	1.21996		40.8875		33.8566	0.828043	32.8386	0.803145	46.0493	1.12624
osa-miR1856	21	TATGCGTAAGACGGATTCGTA	215.772	30.2602		7.4043	0.244688	17.5978	0.581549	23.0914	0.763095		43.2509		23.638	0.546532	20.88	0.482765	49.6498	1.14795
osa-miR396c-3p	21	GGTCAAGAAAGCTGTGGGAAG	288.577	47.9989		8.4879	0.176835	45.461	0.947126	28.2228	0.587988		72.7939		17.3592	0.238471	19.3615	0.265977	48.8918	0.671647
osa-miR812g	24	AAGACGGATGATTAAAGTTGGACA	283.006	2.2956		0.5418	0.236017	0.7332	0.319394	3.706	1.61439		93.5922		41.6128	0.444618	61.6909	0.659146	78.8333	0.842306
osa-miR5513	21	TAACAAAGGACAACAGACTGA	237.61	38.3991		7.9461	0.206935	33.5458	0.873609	36.4901	0.950285		33.3245		16.9898	0.509829	24.4866	0.734793	46.4283	1.39322
osa-miR1870-5p	24	TGCTGAATTAGACCTAGTGGGCAT	268.298	46.9555		6.1402	0.130766	42.1614	0.897901	40.6238	0.865155		38.7604		24.623	0.635262	32.8386	0.84722	36.1951	0.933816
osa-miR1863b.2	23	AGAGACTTGGCTGATGCATTACT	204.881	41.1121		5.4178	0.131781	58.476	1.42235	36.7752	0.89451		23.6344		8.7412	0.369851	14.9956	0.634482	15.7288	0.665505
osa-miR812p	24	GACGGACGATTAAAGTTGGGCATG	157.95	1.6695		0.01	0.00598982	0.9166	0.549027	0.2851	0.17077		61.4494		25.731	0.418735	27.7135	0.450997	40.1747	0.653785
osa-miR2874	24	ATGTGAACAGTGTCAAACAGTGTC	198.171	30.4689		10.2938	0.337846	18.5143	0.607646	28.0803	0.921605		29.0703		23.5149	0.808898	30.5607	1.05127	27.6675	0.951745
osa-miR7694-5p	24	AACCTAGTACTGGATTAGTCACCA	214.238	42.9903		5.2372	0.121823	30.2462	0.703559	29.9333	0.69628		38.9967		13.1733	0.337806	18.792	0.481887	34.8686	0.894142
osa-miR818c	22	AATCCCTTATATTATGGGACGG	141.896	21.0778		6.5013	0.308443	12.4651	0.591385	13.6838	0.649204		26.7069		22.7762	0.852821	15.7549	0.589919	22.9299	0.858576
osa-miR818a	22	AATCCCTTATATTATGGGACGG	139.453	20.243		6.5013	0.321163	11.9152	0.588608	13.6838	0.675977		25.5251		22.8994	0.897133	15.7549	0.617232	22.9299	0.898328
osa-miR1846d-5p	22	TCCCACCGAGCAGCCGGATCTC	264.116	39.6513		8.4879	0.214064	34.4623	0.869134	37.773	0.95263		45.378		25.3616	0.558896	26.0051	0.573077	46.9968	1.03567
osa-miR2118o	22	CTCCTGATGCCTCCCAAGCCTA	198.879	27.3385		10.655	0.389743	72.5909	2.65526	36.6327	1.33997		13.7079		13.2964	0.969981	13.4771	0.983163	11.1807	0.815639
osa-miR156l-5p	21	CGACAGAAGAGAGTGAGCATA	106.867	22.1212		1.0836	0.0489847	18.5143	0.836948	16.3921	0.741013		12.0535		7.8793	0.653694	11.3891	0.944879	17.4343	1.44641
osa-miR5814	24	AATCAAGTTAGGAACCATGCAAGT	157.028	27.3385		1.9865	0.0726631	30.7961	1.12647	37.3454	1.36604		19.3802		10.2185	0.527265	12.528	0.646433	17.4343	0.899593
osa-miR2905	21	TACATGTCAGTGACAAAGGCA	140.318	19.6169		8.6685	0.441889	9.8988	0.504606	15.8219	0.806544		21.98		17.113	0.778571	19.5513	0.889504	27.6675	1.25876
osa-miR166a-5p	21	GGAATGTTGTCTGGTTCAAGG	179.818	40.9034		7.9461	0.194265	17.5978	0.430228	11.9733	0.292721		42.5419		23.3918	0.549853	16.1345	0.379261	19.3293	0.454359
osa-miR166e-5p	21	GGAATGTTGTCTGGTTCAAGG	172.075	39.6513		6.8625	0.173071	16.3146	0.411452	10.5479	0.266016		41.3602		23.3918	0.565563	15.5651	0.37633	18.3818	0.444432
osa-miR812r	24	ACGTTAGACACGAATTTCTACGGC	140.434	25.0429		9.9326	0.396623	13.1983	0.527028	17.8174	0.711475		21.5073		10.8341	0.503741	19.1716	0.8914	22.9299	1.06614
osa-miR169r-3p	21	TGGCAAGTCTCCTCGGCTACC	302.031	39.0252		11.7385	0.300793	96.6046	2.47544	68.7041	1.76051		34.2699		14.8969	0.434693	17.0836	0.498502	19.7083	0.575091
osa-miR3981-3p	21	AGTATTAGGATACGTCTCATC	161.254	22.5386		10.8356	0.480757	21.6306	0.959714	24.8019	1.10042		18.1985		9.9723	0.547974	15.9447	0.876155	37.3321	2.05138
osa-miR7694-3p	22	CCATATTCGTAGTGCTAGGTGG	130.127	23.7908		4.1536	0.174588	23.4637	0.986251	20.8108	0.874741		17.7258		12.6808	0.715387	14.0465	0.792432	13.4547	0.759046
osa-miR408-5p	21	CAGGGATGAGGCAGAGCATGG	115.973	6.8868		1.2642	0.183569	15.5814	2.2625	7.9822	1.15906		25.9978		12.5577	0.483029	19.5513	0.752037	26.1514	1.00591
osa-miR1428e-3p	21	TAAGATAATGCCATGAATTTG	173.019	8.1389		2.8895	0.355023	10.4487	1.2838	4.1336	0.507882		35.2152		38.7812	1.10126	44.7971	1.2721	28.615	0.812575
osa-miR1860-5p	21	AGAAAACCAGCTTCCAGATCT	152.472	26.9211		1.8059	0.0670812	30.0629	1.1167	30.3609	1.12777		22.689		9.7261	0.42867	10.44	0.460135	20.4663	0.902036
osa-miR5144-3p	21	TCTCCTCAGCAGCACAAGAAG	121.332	30.8863		4.3342	0.140328	27.1299	0.87838	22.0936	0.71532		11.3445		6.7713	0.59688	7.0233	0.619093	11.7492	1.03567
osa-miR2275d	22	CTTGTTTTTCTCCAATATCTCA	143.502	18.1561		2.7089	0.149201	33.5458	1.84763	27.5101	1.5152		15.835		12.5577	0.793034	15.5651	0.982955	17.6238	1.11296
osa-miR2863a	21	TTGTCCCATTCTAGTTTAGCT	119.329	12.3128		3.2507	0.26401	32.2626	2.62025	20.3832	1.65545		14.8897		9.1105	0.611866	12.3382	0.82864	14.7812	0.992713
osa-miR166e-3p	21	TCGAACCAGGCTTCATTCCCC	113.48	14.8171		3.0701	0.2072	25.2968	1.70727	14.6816	0.990855		17.0168		10.3416	0.607729	12.1484	0.713906	16.1078	0.946582
osa-miR1868	24	TCACGGAAAACGAGGGAGCAGCCA	104.599	12.1041		2.1671	0.179039	14.8481	1.2267	15.1092	1.24827		26.9432		10.0954	0.374692	13.6669	0.507249	9.6647	0.358706
osa-miR1861h	22	CGGTCTTGAGGCAGGAACTGAG	172.068	4.1738		0.7224	0.17308	9.5321	2.28379	10.2629	2.45889		52.941		13.2964	0.251155	19.5513	0.369304	61.5885	1.16334
osa-miR1861j	22	CGGTCTTGAGGCAGGAACTGAG	172.068	4.1738		0.7224	0.17308	9.5321	2.28379	10.2629	2.45889		52.941		13.2964	0.251155	19.5513	0.369304	61.5885	1.16334
osa-miR3980a-3p	21	CTGGCCGAGGCCGTCGATTCT	102.959	21.2865		9.3908	0.441162	60.1258	2.8246	12.1159	0.569182		0.01		0.01	1	0.01	1	0.01	1
osa-miR3980b-3p	21	CTGGCCGAGGCCGTCGATTCT	102.959	21.2865		9.3908	0.441162	60.1258	2.8246	12.1159	0.569182		0.01		0.01	1	0.01	1	0.01	1
miR9774-y	23	AGCAAGATATTGGGTATTTCTTT	82255.5	5335.18		1591.93	0.298383	6718.87	1.25935	6629.09	1.24252		16411.2		13173.2	0.802691	18324.7	1.11659	14071.4	0.857422
miR396-x	20	TCCACAGGCTTCTTGAACTG	6261.89	897.371		304.118	0.338899	789.701	0.880016	629.74	0.701761		1164.7		672.822	0.577678	647.09	0.555584	1156.35	0.992827
miR5139-x	18	AACCTGGCTCTGATACCA	6210.77	729.792		135.987	0.186336	849.827	1.16448	683.905	0.937123		1183.37		553.894	0.468063	611.784	0.516983	1462.21	1.23563
miR812-y	24	GAACGGTCAAACGTTGGACACGGA	4713.53	868.572		255.9	0.294622	402.916	0.463884	656.11	0.755389		875.654		413.789	0.472549	516.306	0.589623	724.281	0.827132
miR5072-x	20	TCTCCCCAGCGGAGTCGCCA	4227.4	709.549		193.776	0.273098	458.642	0.646386	366.042	0.515879		950.811		503.047	0.529071	370.905	0.390093	674.631	0.709532
miR8155-y	18	AACCTGGCTCTGATACCA	5843.56	704.332		121.72	0.172816	793.001	1.12589	602.23	0.855037		1175.1		495.906	0.422012	543.07	0.462147	1408.2	1.19836
miR894-x	19	TTTCACGTCGGGTTCACCA	5226.33	880.467		173.911	0.197521	679.898	0.772202	524.403	0.595597		1124.29		335.365	0.298291	532.061	0.473242	975.941	0.868053
miR1511-y	18	AACCTGGCTCTGATACCA	3596.8	378.565		80.5444	0.212762	559.646	1.47834	258.282	0.682265		738.811		297.692	0.402933	307.316	0.41596	975.941	1.32096
miR166-y	21	TCGGATTAGGCTTCATTCCCC	2569.83	438.251		36.2992	0.0828274	461.942	1.05406	295.057	0.67326		446.454		223.823	0.501335	229.49	0.514029	438.51	0.982208
miR9773-y	26	TTTTTTTTTATGTTATTTTGTGAAGG	1691.51	232.064		52.7331	0.227235	265.433	1.14379	339.814	1.46431		245.798		237.365	0.965694	189.439	0.77071	128.862	0.524261
miR6225-x	21	AGACTCAAAAGATTCGTCTCG	1510.72	235.195		65.9164	0.280263	172.862	0.734973	205.399	0.873317		237.762		143.798	0.604799	173.494	0.729696	276.296	1.16207
miR167-x	20	TGAAGCTGCCAGCATGATGA	1550.7	383.574		103.119	0.268836	169.196	0.441103	161.782	0.421776		244.852		122.253	0.499293	112.372	0.45894	253.555	1.03554
miR818-y	24	AAATCCCTTATATTATAGGACGGG	703.402	112.067		34.1321	0.304569	64.8919	0.579046	94.3612	0.842007		118.645		91.3512	0.769957	93.96	0.791945	93.9935	0.792227
miR168-y	21	CTTGCCTTGCACCAAGTGAAT	857.7	85.3546		24.5606	0.287748	109.803	1.28643	229.631	2.69032		89.8107		101.2	1.12682	101.553	1.13074	115.786	1.28923
miR5794-y	23	TGAGGAATCACTAGTAGTCGTTT	634.573	102.05		37.2021	0.364548	95.8713	0.939456	96.4993	0.94561		76.5754		60.4494	0.78941	66.816	0.872552	99.1101	1.29428
miR165-y	18	TCGGACCAGGCTTCACCC	443.815	84.7285		3.4313	0.0404976	69.8412	0.824294	40.6238	0.479459		91.2287		42.844	0.469633	41.5702	0.45567	69.5476	0.762343
miR5160-y	24	GCGAGATCGACGTTATATTTCTGC	439.298	151.927		20.5876	0.13551	129.784	0.85425	131.707	0.866907		1.1817		2.2161	1.87535	0.3796	0.321232	1.516	1.2829
miR812-x	20	TTTGTGTCCAACGTTTGACT	386.282	32.3471		13.0027	0.401974	22.5472	0.697039	23.3765	0.722677		74.212		65.4971	0.882568	58.2742	0.78524	97.0256	1.30741
miR6478-x	20	CCGACCTTAGCTCAGTTGGA	244.168	25.8777		7.4043	0.286127	61.409	2.37305	11.9733	0.462688		34.0335		25.731	0.756049	26.0051	0.764103	51.7344	1.5201
miR5801-x	21	AATTGTTTCCGATCGTTGGAT	323.648	52.7988		23.1159	0.437811	34.829	0.659655	46.0403	0.871995		48.4505		23.0225	0.475176	42.7091	0.8815	52.6819	1.08733
miR820-x	23	TCGGCCTCGTGGATGGACCAGGT	268.749	38.6078		11.0162	0.285336	42.3447	1.09679	26.5124	0.686711		40.1784		33.8566	0.842657	31.5098	0.784247	44.7227	1.1131
miR156-y	23	GCTCACTGCTCTGTCTGTCATCC	162.29	28.7993		5.779	0.200665	33.1792	1.15208	18.5301	0.643422		18.9075		13.2964	0.703234	13.8567	0.732868	29.9415	1.58358
miR5168-y	21	TCGGATTAGGCTTCAATCCCT	269.354	50.0858		4.1536	0.0829297	36.2955	0.724666	31.3587	0.6261		47.7415		21.7913	0.456444	25.4356	0.532778	52.4924	1.09951
miR5799-x	21	ATAAGACGAATAGTCAAACGA	187.95	28.5907		13.7251	0.480055	16.6812	0.583448	23.0914	0.807654		32.8518		18.5903	0.565884	19.1716	0.583578	35.2476	1.07293
miR5809-y	21	CTCGTCGCCGGCGACCACAGC	188.256	37.7731		14.8086	0.392041	22.9138	0.606617	19.6705	0.520754		27.8886		17.6054	0.631276	18.6022	0.667018	28.994	1.03964
miR1130-y	24	CTCTTATATTATGGGACAGAGGGA	160.775	34.434		3.0701	0.089159	10.9986	0.319411	23.234	0.67474		25.7615		12.0653	0.468346	27.3338	1.06103	23.8774	0.926864
miR156-x	22	CTTGACAGAAGAGAGTGAGCAC	115.176	19.1996		2.1671	0.112872	22.5472	1.17436	21.9511	1.14331		18.4348		8.1256	0.440775	6.264	0.339792	16.4868	0.89433
miR5169-x	24	AGTTTGACCAAGTTTGTAGAAAAA	118.911	18.3648		5.9596	0.324512	13.1983	0.718674	15.6794	0.853775		20.3256		14.2813	0.702626	14.2364	0.700417	16.8658	0.829781
miR5825-y	24	AAAACATCTTATAATCTGAAACGG	126.575	18.7822		2.8895	0.153842	17.9644	0.956459	25.372	1.35085		20.3256		10.711	0.526971	12.3382	0.607028	18.1923	0.895044
miR2679-x	21	CTTTTCACTTTCGACCGGGTA	114.725	15.2344		3.2507	0.213379	39.2284	2.57499	19.813	1.30054		9.6901		9.1105	0.940186	9.8705	1.01862	8.5276	0.880032
miR1862-y	24	ACTAGGTTTGTTTATTTTGGGAAA	107.858	19.8256		5.0566	0.255054	18.5143	0.933858	20.0981	1.01374		13.2353		10.8341	0.818576	10.2502	0.774459	10.0437	0.758857
novel-m0644-5p	21	TTAAATGGAGAGAACGAAAGA	4567.39	975.421		248.496	0.254757	756.339	0.775397	1481.7	1.51904		332.772		191.32	0.574929	312.82	0.940044	268.526	0.806936
novel-m0098-3p	22	TTGCCTTTTTCTTGTGTCGATT	1794.48	172.17		35.2156	0.20454	301.362	1.75038	115.457	0.670599		531.065		241.182	0.454148	268.783	0.50612	129.241	0.243362
novel-m0485-3p	22	AACACCGGATTCGAATCTTTTG	713.211	0.8348		0.01	0.0119789	0.01	0.0119789	0.2851	0.341519		175.84		116.959	0.665146	168.938	0.960751	250.334	1.42365
novel-m0378-5p	22	AGGCTATTAAGTAACTCTAAAT	260.596	39.0252		7.7655	0.198987	29.8796	0.765649	58.2987	1.49387		32.6154		16.9898	0.520913	18.792	0.57617	57.2299	1.75469
novel-m0113-3p	20	TAGAGAGGGAGGGCAGAGGA	436.849	43.199		17.3369	0.401326	28.4131	0.657726	33.4968	0.775407		105.173		48.7535	0.463555	94.7193	0.900605	65.7576	0.625233
novel-m0644-3p	21	TTTCGTTCTCTCCCTTTAACA	443.43	102.467		20.0458	0.195631	138.949	1.35604	150.949	1.47315		9.9264		5.5402	0.558128	7.4029	0.745779	8.1486	0.820902
novel-m0239-5p	21	AATTTGTCCAGCTTACAGTCT	272.022	35.6861		6.8625	0.192302	55.9097	1.56671	45.4701	1.27417		45.6144		31.2712	0.685555	25.4356	0.557622	25.7724	0.565006
novel-m0278-5p	21	AATTTGTCCAGCTTACAGTCT	272.022	35.6861		6.8625	0.192302	55.9097	1.56671	45.4701	1.27417		45.6144		31.2712	0.685555	25.4356	0.557622	25.7724	0.565006
novel-m0325-3p	21	TTATGAACTAGAAATGCTTAG	279.209	44.0338		9.5714	0.217365	41.0615	0.9325	48.606	1.10383		36.3969		21.7913	0.598713	30.9404	0.850083	46.8073	1.28602
novel-m0402-5p	21	TTATTGTAAAACTGGTAGTAT	156.796	21.4952		5.0566	0.235243	19.0643	0.88691	19.3854	0.901848		29.3066		12.8039	0.436895	20.5004	0.699515	29.1835	0.9958
novel-m0334-5p	22	TTTCTTGACTCGGGATGACTAG	103.768	15.4431		7.0431	0.456068	15.7647	1.02082	14.8241	0.959917		14.6533		9.1105	0.621737	12.1484	0.829056	14.7812	1.00873
novel-m0612-5p	21	TCGTGCGGCGAGGCTGCGAGA	132.19	33.8079		10.4744	0.309821	8.7989	0.260262	9.1225	0.269833		27.8886		11.5728	0.414965	8.7316	0.313089	21.7929	0.781427
novel-m0351-5p	21	TTTCTTAACTCGGTATCGATT	133.321	23.5821		3.4313	0.145504	24.9302	1.05717	26.6549	1.1303		19.6165		8.3718	0.426773	8.5418	0.43544	18.1923	0.927398
novel-m0322-5p	21	TTTCTTAACTCGGTATCGATT	133.321	23.5821		3.4313	0.145504	24.9302	1.05717	26.6549	1.1303		19.6165		8.3718	0.426773	8.5418	0.43544	18.1923	0.927398
novel-m0052-3p	21	TTCATGCGCACATTATTAACT	124.745	20.6604		3.0701	0.148598	26.7633	1.29539	20.2406	0.979681		14.8897		9.7261	0.65321	13.2873	0.892382	16.1078	1.08181
							in total：210
									zy10h≤0.5
osa-miR171f-3p	21	TGATTGAGCCGTGCCAATATC	31666.8	2439.39		8012.19	3.28451	1080.98	0.443136	3518.16	1.44223		1960.24		6236.87	3.1817	5793.63	2.95558	2625.38	1.33932
osa-miR171e-3p	21	TGATTGAGCCGTGCCAATATC	31657.4	2436.67		8011.1	3.28772	1079.15	0.442877	3517.31	1.44349		1960		6237.24	3.18227	5790.22	2.95419	2625.76	1.33967
osa-miR171d-3p	21	TGATTGAGCCGTGCCAATATC	31656.7	2436.67		8010.74	3.28757	1079.15	0.442877	3517.31	1.44349		1960		6237.24	3.18227	5789.84	2.954	2625.76	1.33967
osa-miR171b	21	TGATTGAGCCGTGCCAATATC	31640.7	2438.76		7997.2	3.2792	1080.43	0.443025	3516.17	1.44178		1960.24		6233.43	3.17994	5790.59	2.95403	2623.86	1.33854
osa-miR171c-3p	21	TGATTGAGCCGTGCCAATATC	31640.7	2438.76		7997.2	3.2792	1080.43	0.443025	3516.17	1.44178		1960.24		6233.43	3.17994	5790.59	2.95403	2623.86	1.33854
osa-miR169j	21	TAGCCAAGGATGACTTGCCTG	4249.21	486.459		1014.57	2.08563	238.67	0.490628	584.127	1.20077		255.251		400.369	1.56853	852.094	3.33826	417.665	1.63629
osa-miR169i-5p.1	21	TAGCCAAGGATGACTTGCCTG	4249.21	486.459		1014.57	2.08563	238.67	0.490628	584.127	1.20077		255.251		400.369	1.56853	852.094	3.33826	417.665	1.63629
osa-miR169h	21	TAGCCAAGGATGACTTGCCTG	4249.21	486.459		1014.57	2.08563	238.67	0.490628	584.127	1.20077		255.251		400.369	1.56853	852.094	3.33826	417.665	1.63629
osa-miR169l	21	TAGCCAAGGATGACTTGCCTG	4246.78	485.832		1014.57	2.08831	238.67	0.49126	583.414	1.20086		254.542		400.369	1.5729	852.094	3.34755	417.286	1.63936
osa-miR169k	21	TAGCCAAGGATGACTTGCCTG	4246.78	485.832		1014.57	2.08831	238.67	0.49126	583.414	1.20086		254.542		400.369	1.5729	852.094	3.34755	417.286	1.63936
osa-miR169m	21	TAGCCAAGGATGACTTGCCTG	4176.2	476.441		984.051	2.06542	237.02	0.497481	577.143	1.21136		250.761		393.352	1.56863	844.312	3.367	413.117	1.64745
osa-miR169e	21	TAGCCAAGGATGACTTGCCGG	4969.21	1311		571.396	0.435849	357.455	0.272659	636.867	0.485789		457.562		495.906	1.0838	638.738	1.39596	500.288	1.09338
osa-miR156b-3p	21	GCTCACTCTCTATCTGTCAGC	2164.58	822.659		115.399	0.140275	320.976	0.390169	238.754	0.290222		147.006		139.243	0.947192	128.507	0.874162	252.039	1.71448
osa-miR169g	21	TAGCCAAGGATGACTTGCCTA	1926.78	453.485		279.919	0.617261	161.863	0.356931	310.024	0.683646		174.658		133.333	0.763396	228.921	1.31068	184.576	1.05678
osa-miR169f.1	21	TAGCCAAGGATGACTTGCCTA	1925.99	453.485		279.558	0.616465	161.863	0.356931	309.596	0.682703		174.658		133.333	0.763396	228.921	1.31068	184.576	1.05678
osa-miR166j-5p	21	GAATGACGTCCGGTCTGAAGA	1064.8	224.551		86.6846	0.386035	75.5239	0.336332	76.9714	0.342779		275.341		138.381	0.502581	71.5615	0.259902	115.786	0.420521
osa-miR1883b	24	ACCTGTGACGGGCCGAGAATGGAA	819.303	202.43		22.7547	0.112408	82.123	0.405686	76.2587	0.376716		131.643		72.1453	0.548035	111.613	0.847844	120.335	0.914094
osa-miR169o	21	TAGCCAAGAATGACTTGCCTA	891.256	163.405		82.1698	0.50286	68.7414	0.420681	174.754	1.06945		96.901		79.7784	0.823298	113.322	1.16946	112.186	1.15774
osa-miR169n	21	TAGCCAAGAATGACTTGCCTA	891.01	163.405		82.1698	0.50286	68.7414	0.420681	174.754	1.06945		96.901		79.5322	0.820757	113.322	1.16946	112.186	1.15774
osa-miR399k	21	TGCCAAAGGAAATTTGCCCCG	259.252	58.4334		9.3908	0.160709	21.4473	0.367038	57.8711	0.990377		32.6154		15.02	0.460519	26.1949	0.803145	38.2796	1.17367
osa-miR1437b-3p	24	GTGCTGGCGAGCTCCGGTGCCGCA	552.13	79.0938		132.916	1.68049	38.4952	0.486703	65.2831	0.825388		42.0692		61.3112	1.45739	71.9411	1.71007	61.02	1.45047
osa-miR396e-3p	24	ATGGTTCAAGAAAGCCCATGGAAA	587.804	99.9629		12.0997	0.121042	48.9439	0.489621	39.4835	0.394982		164.732		33.3641	0.202536	56.7556	0.344534	132.463	0.804112
osa-miR1870-3p	24	TTTAGGGCTAATTCAGCATGAACA	555.2	131.475		13.3639	0.101646	63.792	0.485201	74.8333	0.569181		89.5743		34.8415	0.388968	45.936	0.512826	101.384	1.13184
osa-miR812h	24	AAGACGGATGATTAAAGTTGGACA	475.611	2.2956		0.903	0.393361	1.0999	0.479134	4.4187	1.92486		158.587		67.4669	0.425426	103.261	0.651133	137.579	0.867534
osa-miR812j	24	AAGACGGATGATTAAAGTTGGACA	475.611	2.2956		0.903	0.393361	1.0999	0.479134	4.4187	1.92486		158.587		67.4669	0.425426	103.261	0.651133	137.579	0.867534
osa-miR812i	24	AAGACGGATGATTAAAGTTGGACA	475.611	2.2956		0.903	0.393361	1.0999	0.479134	4.4187	1.92486		158.587		67.4669	0.425426	103.261	0.651133	137.579	0.867534
osa-miR530-3p	21	AGGTGCAGAGGCAGATGCAAC	364.053	56.3465		27.9919	0.496782	22.5472	0.400153	24.9444	0.442697		49.6322		55.8941	1.12617	65.4873	1.31945	61.2095	1.23326
osa-miR812g	24	AAGACGGATGATTAAAGTTGGACA	283.006	2.2956		0.5418	0.236017	0.7332	0.319394	3.706	1.61439		93.5922		41.6128	0.444618	61.6909	0.659146	78.8333	0.842306
osa-miR5811	24	CCTAACCTAGGAGTTCGATGGGAC	106.716	13.1475		51.2884	3.901	5.6826	0.432219	15.6794	1.19258		2.1271		6.6482	3.12548	9.1113	4.28344	3.032	1.42541
osa-miR166a-5p	21	GGAATGTTGTCTGGTTCAAGG	179.818	40.9034		7.9461	0.194265	17.5978	0.430228	11.9733	0.292721		42.5419		23.3918	0.549853	16.1345	0.379261	19.3293	0.454359
osa-miR166e-5p	21	GGAATGTTGTCTGGTTCAAGG	172.075	39.6513		6.8625	0.173071	16.3146	0.411452	10.5479	0.266016		41.3602		23.3918	0.565563	15.5651	0.37633	18.3818	0.444432
osa-miR5160	22	CGAGATCGATGGTATATTTCTG	111.473	15.4431		10.8356	0.701647	7.1491	0.462932	12.2584	0.793778		10.8718		19.8215	1.8232	21.0698	1.93802	14.0232	1.28987
miR168-x	20	TCGCTTGTGCAGATCGGGAC	5252.94	707.045		623.948	0.882474	351.589	0.497266	572.154	0.809219		651.6		650.292	0.997993	609.317	0.935108	1086.99	1.66819
miR812-y	24	GAACGGTCAAACGTTGGACACGGA	4713.53	868.572		255.9	0.294622	402.916	0.463884	656.11	0.755389		875.654		413.789	0.472549	516.306	0.589623	724.281	0.827132
miR167-x	20	TGAAGCTGCCAGCATGATGA	1550.7	383.574		103.119	0.268836	169.196	0.441103	161.782	0.421776		244.852		122.253	0.499293	112.372	0.45894	253.555	1.03554
miR1130-y	24	CTCTTATATTATGGGACAGAGGGA	160.775	34.434		3.0701	0.089159	10.9986	0.319411	23.234	0.67474		25.7615		12.0653	0.468346	27.3338	1.06103	23.8774	0.926864
miR1425-x	23	TAGGATTCAATCCTTGCTGCTTT	119.364	14.191		15.3504	1.0817	5.316	0.374604	21.666	1.52674		8.5084		22.6531	2.66244	19.3615	2.27557	12.3177	1.44771
novel-m0485-3p	22	AACACCGGATTCGAATCTTTTG	713.211	0.8348		0.01	0.0119789	0.01	0.0119789	0.2851	0.341519		175.84		116.959	0.665146	168.938	0.960751	250.334	1.42365
novel-m0664-3p	21	GGCCTTGACGGCGAGCGCGGC	259.499	4.5912		4.6954	1.0227	1.0999	0.239567	2.4232	0.527792		43.0146		59.3413	1.37956	73.2698	1.70337	71.0637	1.65208
novel-m0612-5p	21	TCGTGCGGCGAGGCTGCGAGA	132.19	33.8079		10.4744	0.309821	8.7989	0.260262	9.1225	0.269833		27.8886		11.5728	0.414965	8.7316	0.313089	21.7929	0.781427
									in total：40
											zy22h≤0.5
osa-miR156h-3p	22	GCTCACTTCTCTTTCTGTCAGC	8225.56	1237.75		315.135	0.254604	1003.99	0.811145	526.399	0.425288		1451.39		1051.4	0.724411	1090.51	0.751354	1549	1.06725
osa-miR156f-3p	22	GCTCACTTCTCTTTCTGTCAGC	8225.56	1237.75		315.135	0.254604	1003.99	0.811145	526.399	0.425288		1451.39		1051.4	0.724411	1090.51	0.751354	1549	1.06725
osa-miR156l-3p	22	GCTCACTTCTCTTTCTGTCAGC	7933.22	1174.93		307.911	0.262068	970.628	0.826116	513.855	0.43735		1386.87		999.077	0.720385	1061.08	0.765095	1518.87	1.09518
osa-miR169e	21	TAGCCAAGGATGACTTGCCGG	4969.21	1311		571.396	0.435849	357.455	0.272659	636.867	0.485789		457.562		495.906	1.0838	638.738	1.39596	500.288	1.09338
osa-miR396f-3p	24	ATAGTTCAAGAAAGTCCTTGGAAA	2926.28	574.526		153.323	0.266869	318.227	0.553895	171.333	0.298216		615.676		305.079	0.495518	213.735	0.347156	574.384	0.932933
osa-miR156b-3p	21	GCTCACTCTCTATCTGTCAGC	2164.58	822.659		115.399	0.140275	320.976	0.390169	238.754	0.290222		147.006		139.243	0.947192	128.507	0.874162	252.039	1.71448
osa-miR167h-3p	21	AGGTCATGCTGTAGTTTCATC	1530.45	368.757		27.6307	0.0749293	276.432	0.749632	66.4234	0.180128		451.889		158.202	0.350091	83.1404	0.183984	97.9731	0.216808
osa-miR166j-5p	21	GAATGACGTCCGGTCTGAAGA	1064.8	224.551		86.6846	0.386035	75.5239	0.336332	76.9714	0.342779		275.341		138.381	0.502581	71.5615	0.259902	115.786	0.420521
osa-miR1883b	24	ACCTGTGACGGGCCGAGAATGGAA	819.303	202.43		22.7547	0.112408	82.123	0.405686	76.2587	0.376716		131.643		72.1453	0.548035	111.613	0.847844	120.335	0.914094
osa-miR166d-5p	21	GGAATGTTGTCTGGCTCGAGG	451.373	66.5724		18.7817	0.282124	91.1052	1.36851	27.0825	0.406813		94.0648		62.5423	0.664885	43.848	0.466147	47.3758	0.503651
osa-miR396e-3p	24	ATGGTTCAAGAAAGCCCATGGAAA	587.804	99.9629		12.0997	0.121042	48.9439	0.489621	39.4835	0.394982		164.732		33.3641	0.202536	56.7556	0.344534	132.463	0.804112
osa-miR530-3p	21	AGGTGCAGAGGCAGATGCAAC	364.053	56.3465		27.9919	0.496782	22.5472	0.400153	24.9444	0.442697		49.6322		55.8941	1.12617	65.4873	1.31945	61.2095	1.23326
osa-miR812p	24	GACGGACGATTAAAGTTGGGCATG	157.95	1.6695		0.01	0.00598982	0.9166	0.549027	0.2851	0.17077		61.4494		25.731	0.418735	27.7135	0.450997	40.1747	0.653785
osa-miR166a-5p	21	GGAATGTTGTCTGGTTCAAGG	179.818	40.9034		7.9461	0.194265	17.5978	0.430228	11.9733	0.292721		42.5419		23.3918	0.549853	16.1345	0.379261	19.3293	0.454359
osa-miR166e-5p	21	GGAATGTTGTCTGGTTCAAGG	172.075	39.6513		6.8625	0.173071	16.3146	0.411452	10.5479	0.266016		41.3602		23.3918	0.565563	15.5651	0.37633	18.3818	0.444432
osa-miR1428e-5p	22	AATTCACAGGCCCTATCTTGTG	111.573	5.6347		5.0566	0.897404	4.2161	0.748239	2.5657	0.455339		28.8339		22.7762	0.78991	24.8662	0.862395	17.6238	0.611218
osa-miR1428g-5p	22	AATTCACAGGCCCTATCTTGTG	111.573	5.6347		5.0566	0.897404	4.2161	0.748239	2.5657	0.455339		28.8339		22.7762	0.78991	24.8662	0.862395	17.6238	0.611218
osa-miR1428f-5p	22	AATTCACAGGCCCTATCTTGTG	111.573	5.6347		5.0566	0.897404	4.2161	0.748239	2.5657	0.455339		28.8339		22.7762	0.78991	24.8662	0.862395	17.6238	0.611218
miR5054-y	19	TTCCCCACGGACGGCGCCA	2567.76	237.281		491.213	2.07017	345.173	1.4547	116.027	0.488985		407.457		360.357	0.884406	260.431	0.639161	349.823	0.858552
miR167-x	20	TGAAGCTGCCAGCATGATGA	1550.7	383.574		103.119	0.268836	169.196	0.441103	161.782	0.421776		244.852		122.253	0.499293	112.372	0.45894	253.555	1.03554
miR165-y	18	TCGGACCAGGCTTCACCC	443.815	84.7285		3.4313	0.0404976	69.8412	0.824294	40.6238	0.479459		91.2287		42.844	0.469633	41.5702	0.45567	69.5476	0.762343
miR6478-x	20	CCGACCTTAGCTCAGTTGGA	244.168	25.8777		7.4043	0.286127	61.409	2.37305	11.9733	0.462688		34.0335		25.731	0.756049	26.0051	0.764103	51.7344	1.5201
novel-m0485-3p	22	AACACCGGATTCGAATCTTTTG	713.211	0.8348		0.01	0.0119789	0.01	0.0119789	0.2851	0.341519		175.84		116.959	0.665146	168.938	0.960751	250.334	1.42365
novel-m0248-5p	21	CCCGCCACCGGCGCCGCTTCC	695.09	97.876		81.2668	0.830304	71.8577	0.734171	32.2139	0.32913		109.663		77.3161	0.70503	87.696	0.799683	137.2	1.2511
novel-m0612-5p	21	TCGTGCGGCGAGGCTGCGAGA	132.19	33.8079		10.4744	0.309821	8.7989	0.260262	9.1225	0.269833		27.8886		11.5728	0.414965	8.7316	0.313089	21.7929	0.781427
											in total：25
																jn3h≤0.5
osa-miR396f-5p	22	TCTCCACAGGCTTTCTTGAACT	952996	140559		45459	0.323417	144074	1.02501	115538	0.821989		180759		87375.8	0.483383	88992.1	0.492325	150239	0.831159
osa-miR396e-5p	21	TCCACAGGCTTTCTTGAACTG	951842	140408		45273	0.32244	143933	1.0251	115407	0.821942		180581		87274.6	0.483298	88884.5	0.492213	150082	0.831103
osa-miR167f	21	TGAAGCTGCCAGCATGATCTG	702086	155613		53458	0.343532	121028	0.777751	77960.9	0.500993		117708		34193.9	0.290497	44543.9	0.378426	97579.7	0.828995
osa-miR167j	21	TGAAGCTGCCAGCATGATCTG	702077	155616		53456	0.343512	121035	0.777781	77964.6	0.501005		117711		34184.7	0.290412	44528.5	0.378287	97580.7	0.828986
osa-miR167d-5p	21	TGAAGCTGCCAGCATGATCTG	702077	155616		53456	0.343512	121035	0.777781	77964.6	0.501005		117711		34184.7	0.290412	44528.5	0.378287	97580.7	0.828986
osa-miR167h-5p	21	TGAAGCTGCCAGCATGATCTG	701936	155592		53440	0.343461	121011	0.777746	77941.1	0.500931		117692		34177.3	0.290396	44519.4	0.378271	97562.5	0.828965
osa-miR167g	21	TGAAGCTGCCAGCATGATCTG	701888	155589		53424.6	0.34337	121002	0.777698	77937.4	0.500917		117690		34167.3	0.290317	44514.5	0.378236	97563.4	0.82899
osa-miR396c-5p	21	TTCCACAGCTTTCTTGAACTT	89736.5	12457.8		2032.93	0.163186	13290.6	1.06685	11424	0.917014		17388.8		6863.9	0.394732	11094.7	0.638038	15183.9	0.873204
osa-miR156b-5p	20	TGACAGAAGAGAGTGAGCAC	46533.7	7512.87		830.186	0.110502	7137.56	0.950044	7936.75	1.05642		7212.5		3581.04	0.496504	4561.14	0.632394	7761.67	1.07614
osa-miR156c-5p	20	TGACAGAAGAGAGTGAGCAC	46529.9	7511.83		830.186	0.110517	7137.19	0.950127	7936.03	1.05647		7211.56		3581.04	0.49657	4561.14	0.632477	7760.91	1.07618
osa-miR156g-5p	20	TGACAGAAGAGAGTGAGCAC	46529.9	7511.83		830.186	0.110517	7137.19	0.950127	7936.03	1.05647		7211.56		3581.04	0.49657	4561.14	0.632477	7760.91	1.07618
osa-miR156a	20	TGACAGAAGAGAGTGAGCAC	46290.3	7466.13		824.226	0.110395	7099.61	0.95091	7893.98	1.05731		7181.07		3565.04	0.496449	4538.17	0.631963	7722.06	1.07534
osa-miR156i	20	TGACAGAAGAGAGTGAGCAC	46290.3	7466.13		824.226	0.110395	7099.61	0.95091	7893.98	1.05731		7181.07		3565.04	0.496449	4538.17	0.631963	7722.06	1.07534
osa-miR156e	20	TGACAGAAGAGAGTGAGCAC	46290.3	7466.13		824.226	0.110395	7099.61	0.95091	7893.98	1.05731		7181.07		3565.04	0.496449	4538.17	0.631963	7722.06	1.07534
osa-miR167b	21	TGAAGCTGCCAGCATGATCTA	42515.4	7967.4		1455.94	0.182737	4809.88	0.603695	6559.67	0.823314		7251.74		3124.04	0.430799	6298.17	0.868505	5048.55	0.696185
osa-miR167c-5p	21	TGAAGCTGCCAGCATGATCTA	42146.6	7853.46		1438.96	0.183227	4766.62	0.606945	6542.57	0.833081		7176.11		3124.53	0.435407	6291.15	0.876679	4953.23	0.690239
osa-miR167a-5p	21	TGAAGCTGCCAGCATGATCTA	42146.6	7853.46		1438.96	0.183227	4766.62	0.606945	6542.57	0.833081		7176.11		3124.53	0.435407	6291.15	0.876679	4953.23	0.690239
osa-miR166l-3p	21	TCGGACCAGGCTTCAATCCCT	31161.4	5333.72		707.744	0.132692	6290.48	1.17938	4564.26	0.855736		5153.95		2299.17	0.446098	2491.36	0.483389	4320.67	0.838322
osa-miR166k-3p	21	TCGGACCAGGCTTCAATCCCT	30942.7	5297.2		701.423	0.132414	6245.2	1.17896	4529.34	0.855044		5122.75		2279.72	0.445018	2475.42	0.483221	4291.68	0.837768
osa-miR166g-3p	21	TCGGACCAGGCTTCATTCCTC	19875.9	2696.08		392.97	0.145756	5034.07	1.86718	2709.82	1.0051		3340.25		1665.37	0.498578	1594.28	0.477295	2443.07	0.731405
osa-miR1862d	24	ACTAGGTTTGTTTATTTTGGGACG	13770.2	2716.11		326.512	0.120213	3609.93	1.32908	2728.49	1.00456		1662.21		745.583	0.44855	868.798	0.522678	1112.57	0.669335
osa-miR162a	21	TCGATAAACCTCTGCATCCAG	12777.1	1821.45		209.668	0.11511	2789.43	1.53143	2206.8	1.21156		1885.79		897.753	0.476063	1208.95	0.641086	1757.26	0.931845
osa-miR166h-3p	21	TCGGACCAGGCTTCATTCCTC	9774.01	1288.87		177.162	0.137454	2692.28	2.08886	1129.2	0.876112		1658.42		828.932	0.499831	838.997	0.5059	1160.14	0.699542
osa-miR166m	21	TCGGACCAGGCTTCATTCCCT	4838.98	714.349		120.636	0.168876	1041.57	1.45807	490.906	0.687208		890.543		441.49	0.495753	457.462	0.513688	682.022	0.765849
osa-miR395d	21	GTGAAGTGTTTGGGGGAACTC	6259.46	909.475		264.569	0.290903	741.124	0.814892	738.07	0.811534		1685.84		585.78	0.347471	644.053	0.382037	690.549	0.409617
osa-miR395y	21	GTGAAGTGTTTGGGGGAACTC	6260.55	910.101		264.569	0.290702	741.49	0.814734	737.785	0.810663		1685.84		585.78	0.347471	644.433	0.382262	690.549	0.409617
osa-miR395s	21	GTGAAGTGTTTGGGGGAACTC	6260.55	910.101		264.569	0.290702	741.49	0.814734	737.785	0.810663		1685.84		585.78	0.347471	644.433	0.382262	690.549	0.409617
osa-miR395g	21	GTGAAGTGTTTGGGGGAACTC	6260.55	910.101		264.569	0.290702	741.49	0.814734	737.785	0.810663		1685.84		585.78	0.347471	644.433	0.382262	690.549	0.409617
osa-miR395e	21	GTGAAGTGTTTGGGGGAACTC	6258.05	909.058		264.569	0.291036	741.124	0.815266	737.785	0.811593		1685.13		585.78	0.347617	644.053	0.382198	690.549	0.40979
osa-miR395k	21	GTGAAGTGTTTGGGGGAACTC	6258.81	910.518		264.569	0.290569	741.124	0.813958	737.927	0.810448		1685.37		586.027	0.347714	643.104	0.381581	690.17	0.409507
osa-miR395i	21	GTGAAGTGTTTGGGGGAACTC	6258.81	910.518		264.569	0.290569	741.124	0.813958	737.927	0.810448		1685.37		586.027	0.347714	643.104	0.381581	690.17	0.409507
osa-miR395j	21	GTGAAGTGTTTGGGGGAACTC	6254.4	909.058		264.569	0.291036	741.124	0.815266	736.645	0.810339		1683.95		585.78	0.347861	643.104	0.381902	690.17	0.409852
osa-miR395b	21	GTGAAGTGTTTGGGGGAACTC	6253.59	908.849		264.569	0.291103	740.207	0.814445	737.215	0.811152		1684.19		585.288	0.34752	643.104	0.381849	690.17	0.409795
osa-miR395h	21	GTGAAGTGTTTGGGGGAACTC	6250.84	907.805		264.569	0.291438	740.207	0.815381	736.217	0.810985		1683.48		585.288	0.347666	643.104	0.382009	690.17	0.409967
osa-miR395r	21	GTGAAGTGTTTGGGGGAACTC	6089.41	861.059		248.857	0.289013	702.629	0.816006	694.453	0.806511		1672.61		581.841	0.347865	640.257	0.38279	687.707	0.411159
osa-miR395q	21	GTGAAGTGTTTGGGGGAACTC	6089.41	861.059		248.857	0.289013	702.629	0.816006	694.453	0.806511		1672.61		581.841	0.347865	640.257	0.38279	687.707	0.411159
osa-miR395n	21	GTGAAGTGTTTGGGGGAACTC	6090.49	861.685		248.857	0.288803	702.995	0.815838	694.168	0.805594		1672.61		581.841	0.347865	640.636	0.383017	687.707	0.411159
osa-miR395l	21	GTGAAGTGTTTGGGGGAACTC	6090.49	861.685		248.857	0.288803	702.995	0.815838	694.168	0.805594		1672.61		581.841	0.347865	640.636	0.383017	687.707	0.411159
osa-miR395p	21	GTGAAGTGTTTGGGGGAACTC	6088	860.641		248.857	0.289153	702.629	0.816401	694.168	0.80657		1671.9		581.841	0.348012	640.257	0.382953	687.707	0.411333
osa-miR395m	21	GTGAAGTGTTTGGGGGAACTC	6084.43	859.389		248.857	0.289574	701.712	0.816524	693.74	0.807248		1671.42		581.348	0.347816	640.257	0.383061	687.707	0.41145
osa-miR396f-3p	24	ATAGTTCAAGAAAGTCCTTGGAAA	2926.28	574.526		153.323	0.266869	318.227	0.553895	171.333	0.298216		615.676		305.079	0.495518	213.735	0.347156	574.384	0.932933
osa-miR535-5p	21	TGACAACGAGAGAGAGCACGC	1973.89	392.548		24.9218	0.0634873	378.719	0.964773	258.424	0.658326		282.431		128.901	0.456399	159.827	0.565897	348.117	1.23257
osa-miR810b.1	21	TGAACACCGATATGCGTCATC	3196.04	614.595		92.4636	0.150446	390.268	0.635	425.623	0.692527		563.207		222.345	0.394784	284.158	0.504535	603.378	1.07132
osa-miR156j-3p	22	GCTCGCTCCTCTTTCTGTCAGC	1790.4	369.383		98.4231	0.266453	717.66	1.94286	358.915	0.97166		87.6836		42.4746	0.484408	43.6582	0.497906	72.2007	0.823423
osa-miR399b	21	TGCCAAAGGAGAATTGCCCTG	148.65	26.7124		5.2372	0.196059	19.4309	0.727411	28.2228	1.05654		24.5798		10.711	0.435764	14.9956	0.610078	18.7608	0.763261
osa-miR399a	21	TGCCAAAGGAGAATTGCCCTG	148.65	26.7124		5.2372	0.196059	19.4309	0.727411	28.2228	1.05654		24.5798		10.711	0.435764	14.9956	0.610078	18.7608	0.763261
osa-miR399c	21	TGCCAAAGGAGAATTGCCCTG	148.65	26.7124		5.2372	0.196059	19.4309	0.727411	28.2228	1.05654		24.5798		10.711	0.435764	14.9956	0.610078	18.7608	0.763261
osa-miR167h-3p	21	AGGTCATGCTGTAGTTTCATC	1530.45	368.757		27.6307	0.0749293	276.432	0.749632	66.4234	0.180128		451.889		158.202	0.350091	83.1404	0.183984	97.9731	0.216808
osa-miR2878-3p	24	CAGGATTTTATACATGTAAAGAAT	913.919	179.057		33.2291	0.185579	104.853	0.585588	96.7844	0.540523		171.113		79.5322	0.464794	92.6313	0.541346	156.719	0.915881
osa-miR1862b	24	ACGAGGTTGGTTTATTTTGGGACG	880.803	150.257		18.9623	0.126199	198.892	1.32367	147.956	0.984684		147.242		62.9117	0.427267	82.1913	0.558205	72.3902	0.49164
osa-miR1862c	24	ACGAGGTTGGTTTATTTTGGGACG	880.803	150.257		18.9623	0.126199	198.892	1.32367	147.956	0.984684		147.242		62.9117	0.427267	82.1913	0.558205	72.3902	0.49164
osa-miR1862a	24	ACGAGGTTGGTTTATTTTGGGACG	880.803	150.257		18.9623	0.126199	198.892	1.32367	147.956	0.984684		147.242		62.9117	0.427267	82.1913	0.558205	72.3902	0.49164
osa-miR166i-3p	21	TCGGATCAGGCTTCATTCCTC	989.334	145.875		18.2399	0.125038	259.567	1.77938	110.896	0.760212		191.202		76.5774	0.400505	76.3069	0.39909	110.67	0.578811
osa-miR1878	24	ACTTAATCTGGACACTATAAAAGA	818.717	165.909		10.4744	0.0631333	123.918	0.746901	170.335	1.02667		105.646		51.0926	0.483622	80.4829	0.761819	110.859	1.04935
osa-miR166i-5p	21	AATGCAGTTTGATCCAAGATC	793.106	77.8417		25.4636	0.32712	48.0273	0.616987	67.9914	0.873457		178.203		83.4718	0.468408	111.044	0.62313	201.063	1.12828
osa-miR399k	21	TGCCAAAGGAAATTTGCCCCG	259.252	58.4334		9.3908	0.160709	21.4473	0.367038	57.8711	0.990377		32.6154		15.02	0.460519	26.1949	0.803145	38.2796	1.17367
osa-miR1849	21	TATCGTATCCTAGGTTGGTTT	625.24	108.519		23.8383	0.219669	114.936	1.05913	88.232	0.813054		93.5922		45.1831	0.482766	57.3251	0.612499	93.6145	1.00024
osa-miR1860-3p	22	ATCTGGAAGCTAGGTTTTCTCT	675.888	128.136		25.1024	0.195904	92.9384	0.725309	118.45	0.92441		96.4283		48.1379	0.499209	73.2698	0.759837	93.425	0.968855
osa-miR167e-3p	21	AGATCATGTTGCAGCTTCACT	589.131	83.059		5.4178	0.0652283	134.733	1.62214	42.6193	0.513121		152.678		30.5325	0.19998	29.0422	0.190219	111.049	0.727339
osa-miR167i-3p	21	AGATCATGTTGCAGCTTCACT	589.131	83.059		5.4178	0.0652283	134.733	1.62214	42.6193	0.513121		152.678		30.5325	0.19998	29.0422	0.190219	111.049	0.727339
osa-miR396e-3p	24	ATGGTTCAAGAAAGCCCATGGAAA	587.804	99.9629		12.0997	0.121042	48.9439	0.489621	39.4835	0.394982		164.732		33.3641	0.202536	56.7556	0.344534	132.463	0.804112
osa-miR1870-3p	24	TTTAGGGCTAATTCAGCATGAACA	555.2	131.475		13.3639	0.101646	63.792	0.485201	74.8333	0.569181		89.5743		34.8415	0.388968	45.936	0.512826	101.384	1.13184
osa-miR812h	24	AAGACGGATGATTAAAGTTGGACA	475.611	2.2956		0.903	0.393361	1.0999	0.479134	4.4187	1.92486		158.587		67.4669	0.425426	103.261	0.651133	137.579	0.867534
osa-miR812j	24	AAGACGGATGATTAAAGTTGGACA	475.611	2.2956		0.903	0.393361	1.0999	0.479134	4.4187	1.92486		158.587		67.4669	0.425426	103.261	0.651133	137.579	0.867534
osa-miR812i	24	AAGACGGATGATTAAAGTTGGACA	475.611	2.2956		0.903	0.393361	1.0999	0.479134	4.4187	1.92486		158.587		67.4669	0.425426	103.261	0.651133	137.579	0.867534
osa-miR1873	24	TCAACATGGTATCAGAGCTGGAAG	499.716	91.4066		4.6954	0.0513683	60.6757	0.6638	75.8311	0.829602		93.1195		33.4872	0.359615	47.6444	0.511648	92.8565	0.997176
osa-miR1863c	24	TAGAAACTTGGCTGATGCATTACT	276.694	50.5032		5.9596	0.118004	68.0081	1.34661	49.4612	0.979368		41.3602		15.5125	0.375059	17.8429	0.431403	28.0465	0.678104
osa-miR396c-3p	21	GGTCAAGAAAGCTGTGGGAAG	288.577	47.9989		8.4879	0.176835	45.461	0.947126	28.2228	0.587988		72.7939		17.3592	0.238471	19.3615	0.265977	48.8918	0.671647
osa-miR812g	24	AAGACGGATGATTAAAGTTGGACA	283.006	2.2956		0.5418	0.236017	0.7332	0.319394	3.706	1.61439		93.5922		41.6128	0.444618	61.6909	0.659146	78.8333	0.842306
osa-miR1863b.2	23	AGAGACTTGGCTGATGCATTACT	204.881	41.1121		5.4178	0.131781	58.476	1.42235	36.7752	0.89451		23.6344		8.7412	0.369851	14.9956	0.634482	15.7288	0.665505
osa-miR812p	24	GACGGACGATTAAAGTTGGGCATG	157.95	1.6695		0.01	0.00598982	0.9166	0.549027	0.2851	0.17077		61.4494		25.731	0.418735	27.7135	0.450997	40.1747	0.653785
osa-miR7694-5p	24	AACCTAGTACTGGATTAGTCACCA	214.238	42.9903		5.2372	0.121823	30.2462	0.703559	29.9333	0.69628		38.9967		13.1733	0.337806	18.792	0.481887	34.8686	0.894142
osa-miR169r-3p	21	TGGCAAGTCTCCTCGGCTACC	302.031	39.0252		11.7385	0.300793	96.6046	2.47544	68.7041	1.76051		34.2699		14.8969	0.434693	17.0836	0.498502	19.7083	0.575091
osa-miR408-5p	21	CAGGGATGAGGCAGAGCATGG	115.973	6.8868		1.2642	0.183569	15.5814	2.2625	7.9822	1.15906		25.9978		12.5577	0.483029	19.5513	0.752037	26.1514	1.00591
osa-miR1860-5p	21	AGAAAACCAGCTTCCAGATCT	152.472	26.9211		1.8059	0.0670812	30.0629	1.1167	30.3609	1.12777		22.689		9.7261	0.42867	10.44	0.460135	20.4663	0.902036
osa-miR1868	24	TCACGGAAAACGAGGGAGCAGCCA	104.599	12.1041		2.1671	0.179039	14.8481	1.2267	15.1092	1.24827		26.9432		10.0954	0.374692	13.6669	0.507249	9.6647	0.358706
osa-miR1861h	22	CGGTCTTGAGGCAGGAACTGAG	172.068	4.1738		0.7224	0.17308	9.5321	2.28379	10.2629	2.45889		52.941		13.2964	0.251155	19.5513	0.369304	61.5885	1.16334
osa-miR1861j	22	CGGTCTTGAGGCAGGAACTGAG	172.068	4.1738		0.7224	0.17308	9.5321	2.28379	10.2629	2.45889		52.941		13.2964	0.251155	19.5513	0.369304	61.5885	1.16334
miR5139-x	18	AACCTGGCTCTGATACCA	6210.77	729.792		135.987	0.186336	849.827	1.16448	683.905	0.937123		1183.37		553.894	0.468063	611.784	0.516983	1462.21	1.23563
miR812-y	24	GAACGGTCAAACGTTGGACACGGA	4713.53	868.572		255.9	0.294622	402.916	0.463884	656.11	0.755389		875.654		413.789	0.472549	516.306	0.589623	724.281	0.827132
miR8155-y	18	AACCTGGCTCTGATACCA	5843.56	704.332		121.72	0.172816	793.001	1.12589	602.23	0.855037		1175.1		495.906	0.422012	543.07	0.462147	1408.2	1.19836
miR894-x	19	TTTCACGTCGGGTTCACCA	5226.33	880.467		173.911	0.197521	679.898	0.772202	524.403	0.595597		1124.29		335.365	0.298291	532.061	0.473242	975.941	0.868053
miR1511-y	18	AACCTGGCTCTGATACCA	3596.8	378.565		80.5444	0.212762	559.646	1.47834	258.282	0.682265		738.811		297.692	0.402933	307.316	0.41596	975.941	1.32096
miR167-x	20	TGAAGCTGCCAGCATGATGA	1550.7	383.574		103.119	0.268836	169.196	0.441103	161.782	0.421776		244.852		122.253	0.499293	112.372	0.45894	253.555	1.03554
miR165-y	18	TCGGACCAGGCTTCACCC	443.815	84.7285		3.4313	0.0404976	69.8412	0.824294	40.6238	0.479459		91.2287		42.844	0.469633	41.5702	0.45567	69.5476	0.762343
miR5801-x	21	AATTGTTTCCGATCGTTGGAT	323.648	52.7988		23.1159	0.437811	34.829	0.659655	46.0403	0.871995		48.4505		23.0225	0.475176	42.7091	0.8815	52.6819	1.08733
miR5168-y	21	TCGGATTAGGCTTCAATCCCT	269.354	50.0858		4.1536	0.0829297	36.2955	0.724666	31.3587	0.6261		47.7415		21.7913	0.456444	25.4356	0.532778	52.4924	1.09951
miR1130-y	24	CTCTTATATTATGGGACAGAGGGA	160.775	34.434		3.0701	0.089159	10.9986	0.319411	23.234	0.67474		25.7615		12.0653	0.468346	27.3338	1.06103	23.8774	0.926864
miR156-x	22	CTTGACAGAAGAGAGTGAGCAC	115.176	19.1996		2.1671	0.112872	22.5472	1.17436	21.9511	1.14331		18.4348		8.1256	0.440775	6.264	0.339792	16.4868	0.89433
miR5808-x	21	AATTGTTTCCGATCGTTGGAT	116.286	13.7736		9.3908	0.681797	9.5321	0.692056	11.4032	0.827903		20.5619		10.0954	0.490976	16.8938	0.821607	24.6354	1.19811
novel-m0098-3p	22	TTGCCTTTTTCTTGTGTCGATT	1794.48	172.17		35.2156	0.20454	301.362	1.75038	115.457	0.670599		531.065		241.182	0.454148	268.783	0.50612	129.241	0.243362
novel-m0113-3p	20	TAGAGAGGGAGGGCAGAGGA	436.849	43.199		17.3369	0.401326	28.4131	0.657726	33.4968	0.775407		105.173		48.7535	0.463555	94.7193	0.900605	65.7576	0.625233
novel-m0402-5p	21	TTATTGTAAAACTGGTAGTAT	156.796	21.4952		5.0566	0.235243	19.0643	0.88691	19.3854	0.901848		29.3066		12.8039	0.436895	20.5004	0.699515	29.1835	0.9958
novel-m0612-5p	21	TCGTGCGGCGAGGCTGCGAGA	132.19	33.8079		10.4744	0.309821	8.7989	0.260262	9.1225	0.269833		27.8886		11.5728	0.414965	8.7316	0.313089	21.7929	0.781427
novel-m0351-5p	21	TTTCTTAACTCGGTATCGATT	133.321	23.5821		3.4313	0.145504	24.9302	1.05717	26.6549	1.1303		19.6165		8.3718	0.426773	8.5418	0.43544	18.1923	0.927398
novel-m0322-5p	21	TTTCTTAACTCGGTATCGATT	133.321	23.5821		3.4313	0.145504	24.9302	1.05717	26.6549	1.1303		19.6165		8.3718	0.426773	8.5418	0.43544	18.1923	0.927398
																in tptal:96
																		jn10h≤0.5
osa-miR396f-5p	22	TCTCCACAGGCTTTCTTGAACT	952996	140559		45459	0.323417	144074	1.02501	115538	0.821989		180759		87375.8	0.483383	88992.1	0.492325	150239	0.831159
osa-miR396e-5p	21	TCCACAGGCTTTCTTGAACTG	951842	140408		45273	0.32244	143933	1.0251	115407	0.821942		180581		87274.6	0.483298	88884.5	0.492213	150082	0.831103
osa-miR167f	21	TGAAGCTGCCAGCATGATCTG	702086	155613		53458	0.343532	121028	0.777751	77960.9	0.500993		117708		34193.9	0.290497	44543.9	0.378426	97579.7	0.828995
osa-miR167j	21	TGAAGCTGCCAGCATGATCTG	702077	155616		53456	0.343512	121035	0.777781	77964.6	0.501005		117711		34184.7	0.290412	44528.5	0.378287	97580.7	0.828986
osa-miR167d-5p	21	TGAAGCTGCCAGCATGATCTG	702077	155616		53456	0.343512	121035	0.777781	77964.6	0.501005		117711		34184.7	0.290412	44528.5	0.378287	97580.7	0.828986
osa-miR167h-5p	21	TGAAGCTGCCAGCATGATCTG	701936	155592		53440	0.343461	121011	0.777746	77941.1	0.500931		117692		34177.3	0.290396	44519.4	0.378271	97562.5	0.828965
osa-miR167g	21	TGAAGCTGCCAGCATGATCTG	701888	155589		53424.6	0.34337	121002	0.777698	77937.4	0.500917		117690		34167.3	0.290317	44514.5	0.378236	97563.4	0.82899
osa-miR166l-3p	21	TCGGACCAGGCTTCAATCCCT	31161.4	5333.72		707.744	0.132692	6290.48	1.17938	4564.26	0.855736		5153.95		2299.17	0.446098	2491.36	0.483389	4320.67	0.838322
osa-miR166k-3p	21	TCGGACCAGGCTTCAATCCCT	30942.7	5297.2		701.423	0.132414	6245.2	1.17896	4529.34	0.855044		5122.75		2279.72	0.445018	2475.42	0.483221	4291.68	0.837768
osa-miR166g-3p	21	TCGGACCAGGCTTCATTCCTC	19875.9	2696.08		392.97	0.145756	5034.07	1.86718	2709.82	1.0051		3340.25		1665.37	0.498578	1594.28	0.477295	2443.07	0.731405
osa-miR399d	21	TGCCAAAGGAGAGTTGCCCTG	272.683	25.669		38.6469	1.50559	45.2777	1.76391	28.6505	1.11615		53.65		35.4571	0.660897	24.6764	0.459952	20.6558	0.38501
osa-miR399j	21	TGCCAAAGGAGAGTTGCCCTA	206.828	14.3997		35.035	2.43304	34.4623	2.39327	18.1025	1.25714		39.2331		29.1782	0.743714	19.3615	0.493499	17.0553	0.434717
osa-miR395d	21	GTGAAGTGTTTGGGGGAACTC	6259.46	909.475		264.569	0.290903	741.124	0.814892	738.07	0.811534		1685.84		585.78	0.347471	644.053	0.382037	690.549	0.409617
osa-miR395y	21	GTGAAGTGTTTGGGGGAACTC	6260.55	910.101		264.569	0.290702	741.49	0.814734	737.785	0.810663		1685.84		585.78	0.347471	644.433	0.382262	690.549	0.409617
osa-miR395s	21	GTGAAGTGTTTGGGGGAACTC	6260.55	910.101		264.569	0.290702	741.49	0.814734	737.785	0.810663		1685.84		585.78	0.347471	644.433	0.382262	690.549	0.409617
osa-miR395g	21	GTGAAGTGTTTGGGGGAACTC	6260.55	910.101		264.569	0.290702	741.49	0.814734	737.785	0.810663		1685.84		585.78	0.347471	644.433	0.382262	690.549	0.409617
osa-miR395e	21	GTGAAGTGTTTGGGGGAACTC	6258.05	909.058		264.569	0.291036	741.124	0.815266	737.785	0.811593		1685.13		585.78	0.347617	644.053	0.382198	690.549	0.40979
osa-miR395k	21	GTGAAGTGTTTGGGGGAACTC	6258.81	910.518		264.569	0.290569	741.124	0.813958	737.927	0.810448		1685.37		586.027	0.347714	643.104	0.381581	690.17	0.409507
osa-miR395i	21	GTGAAGTGTTTGGGGGAACTC	6258.81	910.518		264.569	0.290569	741.124	0.813958	737.927	0.810448		1685.37		586.027	0.347714	643.104	0.381581	690.17	0.409507
osa-miR395j	21	GTGAAGTGTTTGGGGGAACTC	6254.4	909.058		264.569	0.291036	741.124	0.815266	736.645	0.810339		1683.95		585.78	0.347861	643.104	0.381902	690.17	0.409852
osa-miR395b	21	GTGAAGTGTTTGGGGGAACTC	6253.59	908.849		264.569	0.291103	740.207	0.814445	737.215	0.811152		1684.19		585.288	0.34752	643.104	0.381849	690.17	0.409795
osa-miR395h	21	GTGAAGTGTTTGGGGGAACTC	6250.84	907.805		264.569	0.291438	740.207	0.815381	736.217	0.810985		1683.48		585.288	0.347666	643.104	0.382009	690.17	0.409967
osa-miR395r	21	GTGAAGTGTTTGGGGGAACTC	6089.41	861.059		248.857	0.289013	702.629	0.816006	694.453	0.806511		1672.61		581.841	0.347865	640.257	0.38279	687.707	0.411159
osa-miR395q	21	GTGAAGTGTTTGGGGGAACTC	6089.41	861.059		248.857	0.289013	702.629	0.816006	694.453	0.806511		1672.61		581.841	0.347865	640.257	0.38279	687.707	0.411159
osa-miR395n	21	GTGAAGTGTTTGGGGGAACTC	6090.49	861.685		248.857	0.288803	702.995	0.815838	694.168	0.805594		1672.61		581.841	0.347865	640.636	0.383017	687.707	0.411159
osa-miR395l	21	GTGAAGTGTTTGGGGGAACTC	6090.49	861.685		248.857	0.288803	702.995	0.815838	694.168	0.805594		1672.61		581.841	0.347865	640.636	0.383017	687.707	0.411159
osa-miR395p	21	GTGAAGTGTTTGGGGGAACTC	6088	860.641		248.857	0.289153	702.629	0.816401	694.168	0.80657		1671.9		581.841	0.348012	640.257	0.382953	687.707	0.411333
osa-miR395m	21	GTGAAGTGTTTGGGGGAACTC	6084.43	859.389		248.857	0.289574	701.712	0.816524	693.74	0.807248		1671.42		581.348	0.347816	640.257	0.383061	687.707	0.41145
osa-miR396f-3p	24	ATAGTTCAAGAAAGTCCTTGGAAA	2926.28	574.526		153.323	0.266869	318.227	0.553895	171.333	0.298216		615.676		305.079	0.495518	213.735	0.347156	574.384	0.932933
osa-miR408-3p	21	CTGCACTGCCTCTTCCCTGGC	1562.34	64.9029		31.062	0.478592	216.123	3.32994	84.0984	1.29576		456.616		300.031	0.657074	219.81	0.481388	189.693	0.415431
osa-miR5072	22	CGATTCCCCAGCGGAGTCGCCA	2083.44	133.353		190.525	1.42873	350.856	2.63102	69.2742	0.519478		345.062		274.546	0.795643	166.091	0.481336	553.728	1.60472
osa-miR156j-3p	22	GCTCGCTCCTCTTTCTGTCAGC	1790.4	369.383		98.4231	0.266453	717.66	1.94286	358.915	0.97166		87.6836		42.4746	0.484408	43.6582	0.497906	72.2007	0.823423
osa-miR167h-3p	21	AGGTCATGCTGTAGTTTCATC	1530.45	368.757		27.6307	0.0749293	276.432	0.749632	66.4234	0.180128		451.889		158.202	0.350091	83.1404	0.183984	97.9731	0.216808
osa-miR166j-5p	21	GAATGACGTCCGGTCTGAAGA	1064.8	224.551		86.6846	0.386035	75.5239	0.336332	76.9714	0.342779		275.341		138.381	0.502581	71.5615	0.259902	115.786	0.420521
osa-miR166i-3p	21	TCGGATCAGGCTTCATTCCTC	989.334	145.875		18.2399	0.125038	259.567	1.77938	110.896	0.760212		191.202		76.5774	0.400505	76.3069	0.39909	110.67	0.578811
osa-miR166d-5p	21	GGAATGTTGTCTGGCTCGAGG	451.373	66.5724		18.7817	0.282124	91.1052	1.36851	27.0825	0.406813		94.0648		62.5423	0.664885	43.848	0.466147	47.3758	0.503651
osa-miR167e-3p	21	AGATCATGTTGCAGCTTCACT	589.131	83.059		5.4178	0.0652283	134.733	1.62214	42.6193	0.513121		152.678		30.5325	0.19998	29.0422	0.190219	111.049	0.727339
osa-miR167i-3p	21	AGATCATGTTGCAGCTTCACT	589.131	83.059		5.4178	0.0652283	134.733	1.62214	42.6193	0.513121		152.678		30.5325	0.19998	29.0422	0.190219	111.049	0.727339
osa-miR396e-3p	24	ATGGTTCAAGAAAGCCCATGGAAA	587.804	99.9629		12.0997	0.121042	48.9439	0.489621	39.4835	0.394982		164.732		33.3641	0.202536	56.7556	0.344534	132.463	0.804112
osa-miR1863c	24	TAGAAACTTGGCTGATGCATTACT	276.694	50.5032		5.9596	0.118004	68.0081	1.34661	49.4612	0.979368		41.3602		15.5125	0.375059	17.8429	0.431403	28.0465	0.678104
osa-miR2871a-5p	24	GACCGTAGAAACTAGCATAGAAAA	351.311	68.2419		8.3073	0.121733	66.725	0.977772	48.3209	0.708083		54.5954		30.04	0.55023	22.5884	0.413742	52.4924	0.96148
osa-miR1856	21	TATGCGTAAGACGGATTCGTA	215.772	30.2602		7.4043	0.244688	17.5978	0.581549	23.0914	0.763095		43.2509		23.638	0.546532	20.88	0.482765	49.6498	1.14795
osa-miR396c-3p	21	GGTCAAGAAAGCTGTGGGAAG	288.577	47.9989		8.4879	0.176835	45.461	0.947126	28.2228	0.587988		72.7939		17.3592	0.238471	19.3615	0.265977	48.8918	0.671647
osa-miR812p	24	GACGGACGATTAAAGTTGGGCATG	157.95	1.6695		0.01	0.00598982	0.9166	0.549027	0.2851	0.17077		61.4494		25.731	0.418735	27.7135	0.450997	40.1747	0.653785
osa-miR7694-5p	24	AACCTAGTACTGGATTAGTCACCA	214.238	42.9903		5.2372	0.121823	30.2462	0.703559	29.9333	0.69628		38.9967		13.1733	0.337806	18.792	0.481887	34.8686	0.894142
osa-miR166a-5p	21	GGAATGTTGTCTGGTTCAAGG	179.818	40.9034		7.9461	0.194265	17.5978	0.430228	11.9733	0.292721		42.5419		23.3918	0.549853	16.1345	0.379261	19.3293	0.454359
osa-miR166e-5p	21	GGAATGTTGTCTGGTTCAAGG	172.075	39.6513		6.8625	0.173071	16.3146	0.411452	10.5479	0.266016		41.3602		23.3918	0.565563	15.5651	0.37633	18.3818	0.444432
osa-miR169r-3p	21	TGGCAAGTCTCCTCGGCTACC	302.031	39.0252		11.7385	0.300793	96.6046	2.47544	68.7041	1.76051		34.2699		14.8969	0.434693	17.0836	0.498502	19.7083	0.575091
osa-miR1860-5p	21	AGAAAACCAGCTTCCAGATCT	152.472	26.9211		1.8059	0.0670812	30.0629	1.1167	30.3609	1.12777		22.689		9.7261	0.42867	10.44	0.460135	20.4663	0.902036
osa-miR1861h	22	CGGTCTTGAGGCAGGAACTGAG	172.068	4.1738		0.7224	0.17308	9.5321	2.28379	10.2629	2.45889		52.941		13.2964	0.251155	19.5513	0.369304	61.5885	1.16334
osa-miR1861j	22	CGGTCTTGAGGCAGGAACTGAG	172.068	4.1738		0.7224	0.17308	9.5321	2.28379	10.2629	2.45889		52.941		13.2964	0.251155	19.5513	0.369304	61.5885	1.16334
miR5072-x	20	TCTCCCCAGCGGAGTCGCCA	4227.4	709.549		193.776	0.273098	458.642	0.646386	366.042	0.515879		950.811		503.047	0.529071	370.905	0.390093	674.631	0.709532
miR8155-y	18	AACCTGGCTCTGATACCA	5843.56	704.332		121.72	0.172816	793.001	1.12589	602.23	0.855037		1175.1		495.906	0.422012	543.07	0.462147	1408.2	1.19836
miR894-x	19	TTTCACGTCGGGTTCACCA	5226.33	880.467		173.911	0.197521	679.898	0.772202	524.403	0.595597		1124.29		335.365	0.298291	532.061	0.473242	975.941	0.868053
miR1511-y	18	AACCTGGCTCTGATACCA	3596.8	378.565		80.5444	0.212762	559.646	1.47834	258.282	0.682265		738.811		297.692	0.402933	307.316	0.41596	975.941	1.32096
miR167-x	20	TGAAGCTGCCAGCATGATGA	1550.7	383.574		103.119	0.268836	169.196	0.441103	161.782	0.421776		244.852		122.253	0.499293	112.372	0.45894	253.555	1.03554
miR165-y	18	TCGGACCAGGCTTCACCC	443.815	84.7285		3.4313	0.0404976	69.8412	0.824294	40.6238	0.479459		91.2287		42.844	0.469633	41.5702	0.45567	69.5476	0.762343
miR5160-y	24	GCGAGATCGACGTTATATTTCTGC	439.298	151.927		20.5876	0.13551	129.784	0.85425	131.707	0.866907		1.1817		2.2161	1.87535	0.3796	0.321232	1.516	1.2829
miR156-x	22	CTTGACAGAAGAGAGTGAGCAC	115.176	19.1996		2.1671	0.112872	22.5472	1.17436	21.9511	1.14331		18.4348		8.1256	0.440775	6.264	0.339792	16.4868	0.89433
novel-m0612-5p	21	TCGTGCGGCGAGGCTGCGAGA	132.19	33.8079		10.4744	0.309821	8.7989	0.260262	9.1225	0.269833		27.8886		11.5728	0.414965	8.7316	0.313089	21.7929	0.781427
novel-m0351-5p	21	TTTCTTAACTCGGTATCGATT	133.321	23.5821		3.4313	0.145504	24.9302	1.05717	26.6549	1.1303		19.6165		8.3718	0.426773	8.5418	0.43544	18.1923	0.927398
novel-m0322-5p	21	TTTCTTAACTCGGTATCGATT	133.321	23.5821		3.4313	0.145504	24.9302	1.05717	26.6549	1.1303		19.6165		8.3718	0.426773	8.5418	0.43544	18.1923	0.927398
																		in total:62
																				jn22h≤0.5
osa-miR399d	21	TGCCAAAGGAGAGTTGCCCTG	272.683	25.669		38.6469	1.50559	45.2777	1.76391	28.6505	1.11615		53.65		35.4571	0.660897	24.6764	0.459952	20.6558	0.38501
osa-miR399j	21	TGCCAAAGGAGAGTTGCCCTA	206.828	14.3997		35.035	2.43304	34.4623	2.39327	18.1025	1.25714		39.2331		29.1782	0.743714	19.3615	0.493499	17.0553	0.434717
osa-miR528-5p	21	TGGAAGGGGCATGCAGAGGAG	4529.58	241.873		406.695	1.68144	531.6	2.19785	262.13	1.08375		596.532		1208.25	2.02546	996.736	1.67088	285.771	0.479054
osa-miR395d	21	GTGAAGTGTTTGGGGGAACTC	6259.46	909.475		264.569	0.290903	741.124	0.814892	738.07	0.811534		1685.84		585.78	0.347471	644.053	0.382037	690.549	0.409617
osa-miR395y	21	GTGAAGTGTTTGGGGGAACTC	6260.55	910.101		264.569	0.290702	741.49	0.814734	737.785	0.810663		1685.84		585.78	0.347471	644.433	0.382262	690.549	0.409617
osa-miR395s	21	GTGAAGTGTTTGGGGGAACTC	6260.55	910.101		264.569	0.290702	741.49	0.814734	737.785	0.810663		1685.84		585.78	0.347471	644.433	0.382262	690.549	0.409617
osa-miR395g	21	GTGAAGTGTTTGGGGGAACTC	6260.55	910.101		264.569	0.290702	741.49	0.814734	737.785	0.810663		1685.84		585.78	0.347471	644.433	0.382262	690.549	0.409617
osa-miR395e	21	GTGAAGTGTTTGGGGGAACTC	6258.05	909.058		264.569	0.291036	741.124	0.815266	737.785	0.811593		1685.13		585.78	0.347617	644.053	0.382198	690.549	0.40979
osa-miR395k	21	GTGAAGTGTTTGGGGGAACTC	6258.81	910.518		264.569	0.290569	741.124	0.813958	737.927	0.810448		1685.37		586.027	0.347714	643.104	0.381581	690.17	0.409507
osa-miR395i	21	GTGAAGTGTTTGGGGGAACTC	6258.81	910.518		264.569	0.290569	741.124	0.813958	737.927	0.810448		1685.37		586.027	0.347714	643.104	0.381581	690.17	0.409507
osa-miR395j	21	GTGAAGTGTTTGGGGGAACTC	6254.4	909.058		264.569	0.291036	741.124	0.815266	736.645	0.810339		1683.95		585.78	0.347861	643.104	0.381902	690.17	0.409852
osa-miR395b	21	GTGAAGTGTTTGGGGGAACTC	6253.59	908.849		264.569	0.291103	740.207	0.814445	737.215	0.811152		1684.19		585.288	0.34752	643.104	0.381849	690.17	0.409795
osa-miR395h	21	GTGAAGTGTTTGGGGGAACTC	6250.84	907.805		264.569	0.291438	740.207	0.815381	736.217	0.810985		1683.48		585.288	0.347666	643.104	0.382009	690.17	0.409967
osa-miR395r	21	GTGAAGTGTTTGGGGGAACTC	6089.41	861.059		248.857	0.289013	702.629	0.816006	694.453	0.806511		1672.61		581.841	0.347865	640.257	0.38279	687.707	0.411159
osa-miR395q	21	GTGAAGTGTTTGGGGGAACTC	6089.41	861.059		248.857	0.289013	702.629	0.816006	694.453	0.806511		1672.61		581.841	0.347865	640.257	0.38279	687.707	0.411159
osa-miR395n	21	GTGAAGTGTTTGGGGGAACTC	6090.49	861.685		248.857	0.288803	702.995	0.815838	694.168	0.805594		1672.61		581.841	0.347865	640.636	0.383017	687.707	0.411159
osa-miR395l	21	GTGAAGTGTTTGGGGGAACTC	6090.49	861.685		248.857	0.288803	702.995	0.815838	694.168	0.805594		1672.61		581.841	0.347865	640.636	0.383017	687.707	0.411159
osa-miR395p	21	GTGAAGTGTTTGGGGGAACTC	6088	860.641		248.857	0.289153	702.629	0.816401	694.168	0.80657		1671.9		581.841	0.348012	640.257	0.382953	687.707	0.411333
osa-miR395m	21	GTGAAGTGTTTGGGGGAACTC	6084.43	859.389		248.857	0.289574	701.712	0.816524	693.74	0.807248		1671.42		581.348	0.347816	640.257	0.383061	687.707	0.41145
osa-miR408-3p	21	CTGCACTGCCTCTTCCCTGGC	1562.34	64.9029		31.062	0.478592	216.123	3.32994	84.0984	1.29576		456.616		300.031	0.657074	219.81	0.481388	189.693	0.415431
osa-miR167h-3p	21	AGGTCATGCTGTAGTTTCATC	1530.45	368.757		27.6307	0.0749293	276.432	0.749632	66.4234	0.180128		451.889		158.202	0.350091	83.1404	0.183984	97.9731	0.216808
osa-miR1876	24	ATAAGTGGGTTTGTGGGCTGGCCC	999.185	241.664		41.8976	0.173371	182.76	0.756258	251.297	1.03986		112.972		57.6177	0.510016	70.0429	0.620001	40.9327	0.362325
osa-miR166j-5p	21	GAATGACGTCCGGTCTGAAGA	1064.8	224.551		86.6846	0.386035	75.5239	0.336332	76.9714	0.342779		275.341		138.381	0.502581	71.5615	0.259902	115.786	0.420521
osa-miR1862b	24	ACGAGGTTGGTTTATTTTGGGACG	880.803	150.257		18.9623	0.126199	198.892	1.32367	147.956	0.984684		147.242		62.9117	0.427267	82.1913	0.558205	72.3902	0.49164
osa-miR1862c	24	ACGAGGTTGGTTTATTTTGGGACG	880.803	150.257		18.9623	0.126199	198.892	1.32367	147.956	0.984684		147.242		62.9117	0.427267	82.1913	0.558205	72.3902	0.49164
osa-miR1862a	24	ACGAGGTTGGTTTATTTTGGGACG	880.803	150.257		18.9623	0.126199	198.892	1.32367	147.956	0.984684		147.242		62.9117	0.427267	82.1913	0.558205	72.3902	0.49164
osa-miR5082	24	TGCGATGATGGCCGCGCGGGTTCA	386.596	32.5558		54.7197	1.6808	43.9945	1.35136	42.6193	1.30912		68.3034		67.9594	0.994964	44.6073	0.653076	31.8365	0.466104
osa-miR2877	24	TTGCATCCTCTGCACTTTGGGCCT	325.562	22.7473		40.9946	1.80217	68.5581	3.0139	53.3098	2.34357		23.6344		55.4017	2.34411	51.6306	2.18455	9.2857	0.392889
osa-miR395a	21	GTGAAGTGCTTGGGGGAACTC	406.563	27.7559		52.7331	1.89989	15.948	0.574581	28.2228	1.01682		88.1562		74.6076	0.846311	79.344	0.900039	39.7957	0.451423
osa-miR166a-5p	21	GGAATGTTGTCTGGTTCAAGG	179.818	40.9034		7.9461	0.194265	17.5978	0.430228	11.9733	0.292721		42.5419		23.3918	0.549853	16.1345	0.379261	19.3293	0.454359
osa-miR166e-5p	21	GGAATGTTGTCTGGTTCAAGG	172.075	39.6513		6.8625	0.173071	16.3146	0.411452	10.5479	0.266016		41.3602		23.3918	0.565563	15.5651	0.37633	18.3818	0.444432
osa-miR1868	24	TCACGGAAAACGAGGGAGCAGCCA	104.599	12.1041		2.1671	0.179039	14.8481	1.2267	15.1092	1.24827		26.9432		10.0954	0.374692	13.6669	0.507249	9.6647	0.358706
miR5073-x	25	GTTTGGTGAATCGGAAACTTTTTTC	107.995	8.3476		45.3288	5.43016	4.9494	0.592913	9.6927	1.16114		5.9086		16.4974	2.7921	15.3753	2.60219	1.895	0.320719
novel-m0098-3p	22	TTGCCTTTTTCTTGTGTCGATT	1794.48	172.17		35.2156	0.20454	301.362	1.75038	115.457	0.670599		531.065		241.182	0.454148	268.783	0.50612	129.241	0.243362
																				in total:34

## Sheet: differential in rep2
Table S2. Significantly differentially expressed miRNAs (replicate 2)
				Ziyu44									JNXN
				mock		M. oryzae							mock		M. oryzae
miRNA ID	length	miRNA sequence	total reads	0 hpi_TPM		3 hpi_TPM	3 hpi/0 hpi	10 hpi_TPM	10 hpi/0 hpi	22 hpi_TPM	22 hpi/0 hpi		0 hpi_TPM		3 hpi_TPM	3 hpi/0 hpi	10 hpi_TPM	10 hpi/0 hpi	22 hpi_TPM	22 hpi/0 hpi
							zy3h≥2
osa-miR166c-3p	21	TCGGACCAGGCTTCATTCCCC	77596.2	12002.6		31949.3	2.66186	2247.13	0.18722	4012.42	0.334296		7576.34		4679.86	0.617694	7086.46	0.935341	8042.14	1.06148
osa-miR166j-3p	21	TCGGACCAGGCTTCATTCCCC	77547.4	11989.5		31930.5	2.66322	2245.4	0.187282	4011.48	0.334584		7572.51		4677.3	0.617669	7082	0.935224	8038.73	1.06157
osa-miR166a-3p	21	TCGGACCAGGCTTCATTCCCC	76277	11453.8		32199.6	2.81126	2190.52	0.191248	3918.26	0.342093		7222.12		4505.16	0.623799	6806.86	0.942502	7980.66	1.10503
osa-miR166d-3p	21	TCGGACCAGGCTTCATTCCCC	76277	11453.8		32199.6	2.81126	2190.52	0.191248	3918.26	0.342093		7222.12		4505.16	0.623799	6806.86	0.942502	7980.66	1.10503
osa-miR166f	21	TCGGACCAGGCTTCATTCCCC	76277	11453.8		32199.6	2.81126	2190.52	0.191248	3918.26	0.342093		7222.12		4505.16	0.623799	6806.86	0.942502	7980.66	1.10503
osa-miR166b-3p	21	TCGGACCAGGCTTCATTCCCC	76226.1	11447.8		32178.6	2.81091	2190.52	0.191349	3916.39	0.342109		7213.19		4503.5	0.624342	6804.15	0.943293	7971.94	1.10519
osa-miR156d	20	TGACAGAAGAGAGTGAGCAC	62282.2	5338.81		26221	4.9114	2306.56	0.432036	2580.88	0.483419		6957.42		3505.91	0.50391	4649.11	0.668224	10722.5	1.54116
osa-miR156f-5p	20	TGACAGAAGAGAGTGAGCAC	62157.4	5330.61		26164	4.90826	2303.32	0.432092	2574.84	0.48303		6942.96		3499.3	0.504007	4640.51	0.668376	10701.9	1.5414
osa-miR156j-5p	20	TGACAGAAGAGAGTGAGCAC	62157.4	5330.61		26164	4.90826	2303.32	0.432092	2574.84	0.48303		6942.96		3499.3	0.504007	4640.51	0.668376	10701.9	1.5414
osa-miR156h-5p	20	TGACAGAAGAGAGTGAGCAC	62157.4	5330.61		26164	4.90826	2303.32	0.432092	2574.84	0.48303		6942.96		3499.3	0.504007	4640.51	0.668376	10701.9	1.5414
osa-miR168a-3p	24	GATCCCGCCTTGCACCAAGTGAAT	42013.4	5151.56		19841.9	3.85163	2183.17	0.423788	2269.57	0.44056		3325.94		1911.51	0.574727	2769.84	0.832798	4559.89	1.37101
osa-miR5794	21	TGAGGAATCACTAGTAGTCGT	21651.2	4052.86		9915.61	2.44657	1336.74	0.329826	1435.83	0.354277		1201.7		841.816	0.700519	1062.63	0.884267	1804.03	1.50123
osa-miR156b-5p	20	TGACAGAAGAGAGTGAGCAC	23437.5	2121.67		10174.7	4.79559	935.458	0.440906	1025.81	0.483489		2392.56		1274.14	0.532542	1797.86	0.751438	3715.33	1.55287
osa-miR156c-5p	20	TGACAGAAGAGAGTGAGCAC	23436.3	2121.67		10173.5	4.79502	935.458	0.440906	1025.81	0.483489		2392.56		1274.14	0.532542	1797.86	0.751438	3715.33	1.55287
osa-miR156g-5p	20	TGACAGAAGAGAGTGAGCAC	23436.3	2121.67		10173.5	4.79502	935.458	0.440906	1025.81	0.483489		2392.56		1274.14	0.532542	1797.86	0.751438	3715.33	1.55287
osa-miR156a	20	TGACAGAAGAGAGTGAGCAC	23317.7	2109.16		10128.5	4.80213	931.785	0.44178	1021.25	0.484195		2377.68		1265.58	0.532274	1789.42	0.75259	3694.34	1.55376
osa-miR156i	20	TGACAGAAGAGAGTGAGCAC	23317.7	2109.16		10128.5	4.80213	931.785	0.44178	1021.25	0.484195		2377.68		1265.58	0.532274	1789.42	0.75259	3694.34	1.55376
osa-miR156e	20	TGACAGAAGAGAGTGAGCAC	23317.7	2109.16		10128.5	4.80213	931.785	0.44178	1021.25	0.484195		2377.68		1265.58	0.532274	1789.42	0.75259	3694.34	1.55376
osa-miR166l-3p	21	TCGGACCAGGCTTCAATCCCT	12689.8	2057.17		5601.1	2.72272	539.796	0.262397	668.357	0.324891		1006.95		590.653	0.586578	1077.92	1.07048	1147.84	1.13993
osa-miR166k-3p	21	TCGGACCAGGCTTCAATCCCT	12560.4	2032.58		5554.89	2.73293	536.338	0.263871	661.114	0.325259		996.104		582.391	0.584669	1063.9	1.06806	1133.12	1.13756
osa-miR166g-3p	21	TCGGACCAGGCTTCATTCCTC	13633.8	1821.6		5536.85	3.03956	450.334	0.247219	692.902	0.380382		1357.12		871.709	0.64232	1222.74	0.900976	1680.53	1.2383
osa-miR393b-3p	21	TCAGTGCAATCCCTTTGGAAT	10944.2	1479.45		3189.93	2.15615	593.386	0.401084	993.079	0.671247		1362.23		871.709	0.639914	1356.08	0.99549	1098.37	0.806301
osa-miR1862d	24	ACTAGGTTTGTTTATTTTGGGACG	8761.79	1297.38		4139.62	3.19075	427.644	0.329621	753.662	0.58091		570.022		402.581	0.706255	498.335	0.874238	672.541	1.17985
osa-miR162a	21	TCGATAAACCTCTGCATCCAG	6614.01	884.696		2742.57	3.10001	187.567	0.212013	341.086	0.38554		541.319		395.371	0.730384	414.854	0.766377	1106.54	2.04416
osa-miR166h-3p	21	TCGGACCAGGCTTCATTCCTC	6682.4	964.731		2421.99	2.51054	239.429	0.248182	329.819	0.341877		764.991		453.204	0.592431	669.12	0.874677	839.109	1.09689
osa-miR164a	21	TGGAGAAGCAGGGCACGTGCA	8009.9	851.69		2139.05	2.51153	445.58	0.523172	759.429	0.891674		799.009		996.539	1.24722	967.675	1.21109	1050.93	1.31529
osa-miR164b	21	TGGAGAAGCAGGGCACGTGCA	8009.9	851.69		2139.05	2.51153	445.58	0.523172	759.429	0.891674		799.009		996.539	1.24722	967.675	1.21109	1050.93	1.31529
osa-miR164f	21	TGGAGAAGCAGGGCACGTGCA	8009.9	851.69		2139.05	2.51153	445.58	0.523172	759.429	0.891674		799.009		996.539	1.24722	967.675	1.21109	1050.93	1.31529
osa-miR1432-5p	21	ATCAGGAGAGATGACACCGAC	1716.67	178.622		532.055	2.97867	40.193	0.225017	71.7582	0.401732		184.763		172.75	0.934979	139.878	0.757067	396.655	2.14683
osa-miR1862e	24	CTAGATTTGTTTATTTTGGGACGG	3013.46	424.335		1126.3	2.65428	135.489	0.319298	233.65	0.550627		318.923		203.394	0.637751	259.364	0.813248	312.008	0.978316
osa-miR166m	21	TCGGACCAGGCTTCATTCCCT	2880.49	463.813		1143.65	2.46576	102.859	0.221769	165.379	0.356564		270.872		188.522	0.695982	276.729	1.02162	268.662	0.99184
osa-miR535-5p	21	TGACAACGAGAGAGAGCACGC	1723.83	182.073		911.899	5.00841	28.3079	0.155475	55.5288	0.30498		112.261		98.2419	0.87512	87.3042	0.777689	248.216	2.21106
osa-miR156j-3p	22	GCTCGCTCCTCTTTCTGTCAGC	1160.75	206.666		565.384	2.73573	79.0894	0.382691	99.6567	0.482211		61.8711		42.0607	0.679812	50.8213	0.821406	55.2045	0.89225
osa-miR167h-3p	21	AGGTCATGCTGTAGTTTCATC	454.844	37.105		212.341	5.72271	12.9655	0.349427	9.9254	0.267495		72.5019		39.6573	0.546983	32.1815	0.443871	38.1661	0.526415
osa-miR1320-3p	21	TGTAAAATTCATTCGTTCCAA	294.754	22.867		55.4904	2.42666	11.4528	0.500844	16.0953	0.703866		34.0185		27.4897	0.808081	28.5173	0.838288	98.8229	2.90498
osa-miR1876	24	ATAAGTGGGTTTGTGGGCTGGCCC	747.656	84.1335		367.13	4.36366	35.4389	0.421222	47.347	0.56276		51.8782		41.0092	0.79049	35.5271	0.684818	85.1921	1.64216
osa-miR535-3p	21	GTGCTTTCTCCCGTTGTCACT	674.587	130.946		262.506	2.00469	30.0367	0.229382	28.5691	0.218174		68.8874		54.5287	0.791563	47.3163	0.686864	51.7968	0.751905
osa-miR1425-3p	21	CAGCAAGAACTGGATCTTAAT	486.527	58.8934		155.304	2.63704	26.5792	0.45131	18.1072	0.307457		50.8151		39.9577	0.786335	47.3163	0.931146	89.554	1.76235
osa-miR1862b	24	ACGAGGTTGGTTTATTTTGGGACG	701.48	69.2483		319.371	4.61196	24.6344	0.35574	40.3724	0.583009		65.9108		44.314	0.672333	52.5737	0.797649	85.0558	1.29047
osa-miR1862c	24	ACGAGGTTGGTTTATTTTGGGACG	701.48	69.2483		319.371	4.61196	24.6344	0.35574	40.3724	0.583009		65.9108		44.314	0.672333	52.5737	0.797649	85.0558	1.29047
osa-miR1862a	24	ACGAGGTTGGTTTATTTTGGGACG	701.48	69.2483		319.371	4.61196	24.6344	0.35574	40.3724	0.583009		65.9108		44.314	0.672333	52.5737	0.797649	85.0558	1.29047
osa-miR166i-3p	21	TCGGATCAGGCTTCATTCCTC	585.28	83.9178		201.174	2.39728	18.1517	0.216303	26.9596	0.321262		68.2496		49.5716	0.726328	59.4242	0.870689	77.8315	1.14039
osa-miR1878	24	ACTTAATCTGGACACTATAAAAGA	563.685	63.208		278.998	4.41397	14.9103	0.235893	23.7406	0.375595		45.0745		28.391	0.629868	23.8971	0.530169	85.4647	1.89608
osa-miR1857-3p	21	TCATGCTCCAAGAAAACCAGG	333.828	56.9519		137.781	2.41926	9.2919	0.163153	13.5469	0.237866		29.3409		22.0819	0.752598	23.2599	0.792747	41.5738	1.41692
osa-miR167e-3p	21	AGATCATGTTGCAGCTTCACT	197.387	14.238		101.189	7.10693	5.8345	0.409784	4.8286	0.339135		24.4508		9.7641	0.399337	16.0907	0.658085	20.9913	0.858512
osa-miR167i-3p	21	AGATCATGTTGCAGCTTCACT	197.387	14.238		101.189	7.10693	5.8345	0.409784	4.8286	0.339135		24.4508		9.7641	0.399337	16.0907	0.658085	20.9913	0.858512
osa-miR396e-3p	24	ATGGTTCAAGAAAGCCCATGGAAA	190.317	20.0626		75.0753	3.74205	9.7241	0.484688	6.1699	0.307532		26.7896		12.6182	0.471011	16.5687	0.618475	23.3086	0.870062
osa-miR5150-5p	24	AGCTTCTGACAGCTGCAGTTTCTC	341.906	47.2442		105.827	2.24	19.8804	0.420801	26.289	0.556449		46.1376		24.4854	0.530704	26.9241	0.583561	45.1178	0.977897
osa-miR812h	24	AAGACGGATGATTAAAGTTGGACA	192.508	0.01		2.2334	223.34	0.8644	86.44	1.073	107.3		52.0908		24.6356	0.472936	30.907	0.593329	80.694	1.5491
osa-miR812j	24	AAGACGGATGATTAAAGTTGGACA	192.508	0.01		2.2334	223.34	0.8644	86.44	1.073	107.3		52.0908		24.6356	0.472936	30.907	0.593329	80.694	1.5491
osa-miR812i	24	AAGACGGATGATTAAAGTTGGACA	192.508	0.01		2.2334	223.34	0.8644	86.44	1.073	107.3		52.0908		24.6356	0.472936	30.907	0.593329	80.694	1.5491
osa-miR1873	24	TCAACATGGTATCAGAGCTGGAAG	196.412	18.1211		103.937	5.7357	6.2666	0.345818	4.5603	0.251657		13.6074		15.3221	1.12601	11.152	0.819554	23.4449	1.72295
osa-miR1320-5p	21	TGGAACGGAGGAATTTTATAG	123.421	3.4516		53.9443	15.6288	7.131	2.066	4.5603	1.32121		3.8271		12.0174	3.14008	15.4535	4.03791	23.036	6.01918
osa-miR1863c	24	TAGAAACTTGGCTGATGCATTACT	188.477	26.9659		85.5549	3.17271	6.0506	0.22438	6.9746	0.258645		18.9228		10.0645	0.531872	14.179	0.749308	19.7646	1.04449
osa-miR2864.1	21	TTTTGCTGCCCTTGTTTTGCA	122.086	20.4941		46.3852	2.26334	5.6184	0.274147	8.45	0.412314		11.2686		6.6095	0.586541	10.9927	0.975516	12.2677	1.08866
osa-miR5542	21	TTTGAGAAGGTATCATGAGAT	195.511	47.0285		106.171	2.25758	22.6896	0.482465	19.5826	0.416399		0.01		0.01	1	0.01	1	0.01	1
osa-miR2871a-5p	24	GACCGTAGAAACTAGCATAGAAAA	127.621	18.5525		58.411	3.14842	9.7241	0.52414	3.6214	0.195197		9.1425		6.0087	0.657227	6.2133	0.679606	15.948	1.74438
osa-miR390-5p	21	AAGCTCAGGAGGGATAGCGCC	176.93	23.73		70.4368	2.96826	6.9149	0.291399	9.6572	0.406962		16.1588		13.0689	0.808779	13.3824	0.82818	23.5812	1.45934
osa-miR396c-3p	21	GGTCAAGAAAGCTGTGGGAAG	143.132	11.2178		60.6444	5.40609	8.8597	0.789789	6.7064	0.597836		13.3948		12.0174	0.897169	17.2059	1.28452	13.0855	0.976909
osa-miR812g	24	AAGACGGATGATTAAAGTTGGACA	115.26	0.01		1.718	171.8	0.8644	86.44	1.073	107.3		29.9788		16.9745	0.566217	17.2059	0.573936	47.435	1.58228
osa-miR1432-3p	21	CAGGTGTCATCTCCCCTGAAC	195.038	13.5908		40.0287	2.94528	13.6137	1.00168	12.0715	0.888211		21.2615		39.6573	1.86522	22.7819	1.07151	32.0322	1.50658
osa-miR1863b.2	23	AGAGACTTGGCTGATGCATTACT	172.639	36.0264		73.3573	2.03621	7.9954	0.221932	11.6691	0.323904		11.4812		9.1632	0.798105	13.5417	1.17947	9.4052	0.819183
osa-miR812p	24	GACGGACGATTAAAGTTGGGCATG	106.829	0.6472		1.3744	2.12361	1.5126	2.33714	0.5365	0.828956		31.8923		19.0775	0.598185	20.7109	0.649401	31.0781	0.97447
osa-miR7694-5p	24	AACCTAGTACTGGATTAGTCACCA	131.894	22.6513		50.6801	2.2374	5.6184	0.248039	5.6334	0.248701		12.9695		7.8113	0.602282	10.0368	0.773877	16.4932	1.27169
osa-miR1846d-5p	22	TCCCACCGAGCAGCCGGATCTC	100.679	14.8852		38.1389	2.5622	3.2414	0.21776	5.231	0.351423		11.6939		6.0087	0.513832	6.2133	0.531328	15.2664	1.3055
osa-miR2118o	22	CTCCTGATGCCTCCCAAGCCTA	106.538	16.1795		33.5004	2.07055	7.5632	0.467456	6.8405	0.422788		14.4579		6.7598	0.467551	10.1961	0.705227	11.0409	0.763659
osa-miR156l-5p	21	CGACAGAAGAGAGTGAGCATA	162.504	25.4558		75.9343	2.98299	8.4276	0.331068	10.3278	0.405715		7.4415		8.4121	1.13043	8.9216	1.1989	17.5837	2.36292
osa-miR166a-5p	21	GGAATGTTGTCTGGTTCAAGG	142.569	20.4941		47.9314	2.33879	11.885	0.579923	6.1699	0.301057		18.7102		17.7256	0.947376	13.3824	0.715246	6.2701	0.335117
osa-miR166e-5p	21	GGAATGTTGTCTGGTTCAAGG	137.443	20.0626		46.2134	2.30346	11.885	0.592396	5.6334	0.280791		17.4345		17.4252	0.999467	13.0638	0.749307	5.7249	0.328366
osa-miR408-5p	21	CAGGGATGAGGCAGAGCATGG	157.003	4.746		23.1926	4.88677	7.7793	1.63913	26.6914	5.62398		12.9695		3.455	0.266394	23.1006	1.78115	55.0682	4.24598
miR5139-x	18	AACCTGGCTCTGATACCA	2090.09	348.183		793.874	2.28005	176.547	0.507051	79.1352	0.22728		234.94		100.645	0.428387	163.616	0.696415	193.148	0.822114
miR8155-y	18	AACCTGGCTCTGATACCA	1822.51	311.725		699.558	2.24415	170.928	0.548329	65.3201	0.209544		197.095		91.1817	0.462629	138.125	0.700808	148.575	0.753826
miR894-x	19	TTTCACGTCGGGTTCACCA	1910.19	278.072		647.503	2.32855	157.963	0.568064	85.8415	0.308703		287.031		110.86	0.386231	170.626	0.59445	172.293	0.600258
miR166-y	21	TCGGATTAGGCTTCATTCCCC	1195.46	166.325		558.34	3.35692	36.3033	0.218267	59.6867	0.358855		99.2914		61.7392	0.621798	87.1449	0.877668	126.63	1.27533
miR168-y	21	CTTGCCTTGCACCAAGTGAAT	228.273	25.8872		103.765	4.00837	12.7494	0.492498	12.608	0.487036		17.8597		7.5108	0.420545	14.4976	0.811749	33.3953	1.86987
miR165-y	18	TCGGACCAGGCTTCACCC	245.61	40.9881		109.091	2.66153	5.8345	0.142346	15.1564	0.369776		18.9228		14.4208	0.762086	17.2059	0.909268	23.9901	1.26779
miR156-y	23	GCTCACTGCTCTGTCTGTCATCC	170.263	12.9436		43.6364	3.37127	9.0758	0.701181	33.8001	2.61134		12.7569		10.8156	0.847824	14.6569	1.14894	32.5775	2.55372
miR156-x	22	CTTGACAGAAGAGAGTGAGCAC	111.091	7.5504		32.4696	4.30038	3.4575	0.457923	3.4873	0.46187		9.9929		4.9572	0.496072	8.2843	0.829019	40.8922	4.09213
novel-m0644-5p	21	TTAAATGGAGAGAACGAAAGA	2199.11	347.104		1046.42	3.0147	219.549	0.632514	177.585	0.511617		96.1022		54.8292	0.57053	72.9659	0.759253	184.56	1.92046
novel-m0485-3p	22	AACACCGGATTCGAATCTTTTG	470.734	0.01		0.3436	34.36	0.01	1	0.01	1		101.843		76.9111	0.755194	112.635	1.10597	178.972	1.75733
novel-m0113-3p	20	TAGAGAGGGAGGGCAGAGGA	213.919	22.4356		47.7596	2.12874	25.9309	1.15579	12.7421	0.567941		31.2545		15.4723	0.495042	29.1545	0.93281	29.1698	0.933299
novel-m0644-3p	21	TTTCGTTCTCTCCCTTTAACA	214.053	49.4015		125.068	2.53167	8.8597	0.179341	19.8509	0.401828		2.5514		2.2533	0.883162	1.4338	0.561966	4.6345	1.81645
							in total:82
									zy10h≥2
osa-miR159a.1	21	TTTGGATTGAAGGGAGCTCTG	3.10623e+06	243232		144635	0.594639	603232	2.48006	473181	1.94539		421984		481602	1.14128	389091	0.922053	349269	0.827684
osa-miR159b	21	TTTGGATTGAAGGGAGCTCTG	3.10623e+06	243232		144635	0.594639	603232	2.48006	473181	1.94539		421984		481602	1.14128	389091	0.922053	349269	0.827684
osa-miR171f-3p	21	TGATTGAGCCGTGCCAATATC	53921.7	4524.22		2815.07	0.622221	14285.4	3.15753	9986.32	2.2073		4922.69		6152.58	1.24984	5969.51	1.21265	5265.96	1.06973
osa-miR171e-3p	21	TGATTGAGCCGTGCCAATATC	53913.8	4523.58		2813.52	0.621968	14284.1	3.15769	9986.86	2.20774		4922.05		6149.73	1.24942	5967.91	1.21249	5266.1	1.0699
osa-miR171d-3p	21	TGATTGAGCCGTGCCAATATC	53913.5	4523.58		2813.52	0.621968	14284.1	3.15769	9986.86	2.20774		4922.05		6149.43	1.24936	5967.91	1.21249	5266.1	1.0699
osa-miR171b	21	TGATTGAGCCGTGCCAATATC	53898	4522.07		2814.55	0.622404	14278	3.15741	9982.17	2.20743		4920.77		6150.18	1.24984	5967.28	1.21267	5262.97	1.06954
osa-miR171c-3p	21	TGATTGAGCCGTGCCAATATC	53898	4522.07		2814.55	0.622404	14278	3.15741	9982.17	2.20743		4920.77		6150.18	1.24984	5967.28	1.21267	5262.97	1.06954
osa-miR159f	21	CTTGGATTGAAGGGAGCTCTA	17687.8	1147.02		1085.07	0.945991	3821.79	3.33193	2528.3	2.20424		2594.97		2731.39	1.05257	1960.2	0.755385	1819.02	0.70098
osa-miR160e-5p	21	TGCCTGGCTCCCTGTATGCCG	7355.87	534.356		571.397	1.06932	1613.98	3.02043	1213.32	2.27062		846.847		1064.44	1.25694	899.648	1.06235	611.884	0.722543
osa-miR172d-3p	21	AGAATCTTGATGATGCTGCAT	5354.26	230.181		159.771	0.694112	2105.59	9.14757	585.466	2.54351		593.835		691.899	1.16514	473.641	0.797598	513.879	0.865356
osa-miR172a	21	AGAATCTTGATGATGCTGCAT	5354.26	230.181		159.771	0.694112	2105.59	9.14757	585.466	2.54351		593.835		691.899	1.16514	473.641	0.797598	513.879	0.865356
osa-miR7695-5p	24	TGCCTATGTGGCACGCCACGTGAA	997.566	89.9581		37.1082	0.412505	363.681	4.04279	140.968	1.56704		87.385		101.547	1.16206	83.0027	0.949851	93.9158	1.07474
osa-miR5082	24	TGCGATGATGGCCGCGCGGGTTCA	910.394	41.2038		51.8827	1.25917	112.151	2.72187	79.2693	1.92383		170.73		161.633	0.946718	129.682	0.759572	163.841	0.959652
osa-miR812h	24	AAGACGGATGATTAAAGTTGGACA	192.508	0.01		2.2334	223.34	0.8644	86.44	1.073	107.3		52.0908		24.6356	0.472936	30.907	0.593329	80.694	1.5491
osa-miR812j	24	AAGACGGATGATTAAAGTTGGACA	192.508	0.01		2.2334	223.34	0.8644	86.44	1.073	107.3		52.0908		24.6356	0.472936	30.907	0.593329	80.694	1.5491
osa-miR812i	24	AAGACGGATGATTAAAGTTGGACA	192.508	0.01		2.2334	223.34	0.8644	86.44	1.073	107.3		52.0908		24.6356	0.472936	30.907	0.593329	80.694	1.5491
osa-miR1320-5p	21	TGGAACGGAGGAATTTTATAG	123.421	3.4516		53.9443	15.6288	7.131	2.066	4.5603	1.32121		3.8271		12.0174	3.14008	15.4535	4.03791	23.036	6.01918
osa-miR1879	24	GTGTTTGGTTTAGGGATGAGGTGG	307.34	34.3006		34.8748	1.01674	77.5767	2.26167	54.8581	1.59933		23.1751		33.949	1.46489	31.7035	1.368	16.9021	0.729322
osa-miR812g	24	AAGACGGATGATTAAAGTTGGACA	115.26	0.01		1.718	171.8	0.8644	86.44	1.073	107.3		29.9788		16.9745	0.566217	17.2059	0.573936	47.435	1.58228
osa-miR812p	24	GACGGACGATTAAAGTTGGGCATG	106.829	0.6472		1.3744	2.12361	1.5126	2.33714	0.5365	0.828956		31.8923		19.0775	0.598185	20.7109	0.649401	31.0781	0.97447
osa-miR5811	24	CCTAACCTAGGAGTTCGATGGGAC	323.847	27.1816		16.3207	0.600432	122.308	4.49965	84.3661	3.10379		19.1354		22.9832	1.20108	10.8334	0.566144	20.7187	1.08274
osa-miR1865-5p	24	TGCTAGTGATGGTGATTCTTCGAC	159.629	9.7077		7.9027	0.814065	29.8206	3.07185	28.1668	2.90149		20.1985		25.0862	1.24198	19.1177	0.946491	19.6283	0.97177
osa-miR5145	24	ACCTGTTTGGATTCTTGAGGGCTA	173.261	18.7682		9.4488	0.503447	79.3054	4.22552	48.9565	2.60848		2.764		5.558	2.01085	4.7794	1.72916	3.6803	1.33151
osa-miR1429-3p	21	GTTGCACGGGTTTGTATGTTG	103.635	10.1392		8.5899	0.847197	21.393	2.10993	19.3143	1.90491		11.9065		12.9187	1.08501	9.5589	0.80283	9.8141	0.824264
osa-miR171a	21	TGATTGAGCCGCGCCAATATC	106.869	8.1976		6.8719	0.838282	29.3884	3.585	21.3263	2.60153		8.9299		11.1161	1.24482	13.5417	1.51644	7.4969	0.839528
miR159-y	20	TTTGGATTGAAGGGAGCTTG	12731.5	1053.61		599.572	0.569064	2559.82	2.42957	2032.97	1.92953		1625.45		1892.28	1.16416	1526.87	0.939354	1440.91	0.886468
miR7767-x	20	CCCAAGATGAGTGCTCTCCC	1071.13	56.7362		34.8748	0.614683	492.904	8.68764	140.968	2.48462		120.766		70.6019	0.584619	124.424	1.0303	29.8513	0.247184
miR5145-x	24	CCACCTGTTTGGATCCTTGAGAGC	472.063	35.3792		28.5183	0.806075	117.338	3.31657	88.39	2.49836		48.6889		61.1383	1.25569	44.7673	0.919456	47.8439	0.982645
miR1425-x	23	TAGGATTCAATCCTTGCTGCTTT	131.783	12.7279		10.6514	0.836854	30.2528	2.37689	21.8628	1.71771		13.3948		10.8156	0.807448	12.5858	0.939603	19.492	1.45519
miR399-y	19	TGCCAAAGGAGAGTTGCTT	116.346	7.5504		12.3694	1.63824	24.8505	3.29128	16.7659	2.22053		9.7803		18.3265	1.87382	17.8432	1.8244	8.86	0.905903
novel-m0267-5p	22	AATCGGTACTGCAGTAGCTCTT	1224.37	23.9457		27.1439	1.13356	238.781	9.97176	249.209	10.4072		259.603		158.329	0.609886	106.103	0.408713	161.252	0.621146
novel-m0301-5p	21	CGCCGCGATGGCCTTGACGGC	220.159	6.2561		2.4052	0.384457	17.2873	2.76327	14.0834	2.25115		32.5302		60.5374	1.86096	40.3065	1.23905	46.7534	1.43723
novel-m0271-3p	21	CTCCAGTGATGACTGAATTCA	174.004	7.119		7.5591	1.06182	34.1424	4.79595	31.9223	4.4841		20.4111		32.2966	1.58231	13.701	0.671252	26.8526	1.31559
novel-m0045-5p	20	TGTATGGTCTGGAGAAGCTT	166.45	4.746		2.577	0.542984	36.9516	7.78584	22.5334	4.74787		26.5769		30.7945	1.15869	20.8702	0.785276	21.4003	0.805222
									in total:34
											zy22h≥2
osa-miR171f-3p	21	TGATTGAGCCGTGCCAATATC	53921.7	4524.22		2815.07	0.622221	14285.4	3.15753	9986.32	2.2073		4922.69		6152.58	1.24984	5969.51	1.21265	5265.96	1.06973
osa-miR171e-3p	21	TGATTGAGCCGTGCCAATATC	53913.8	4523.58		2813.52	0.621968	14284.1	3.15769	9986.86	2.20774		4922.05		6149.73	1.24942	5967.91	1.21249	5266.1	1.0699
osa-miR171d-3p	21	TGATTGAGCCGTGCCAATATC	53913.5	4523.58		2813.52	0.621968	14284.1	3.15769	9986.86	2.20774		4922.05		6149.43	1.24936	5967.91	1.21249	5266.1	1.0699
osa-miR171b	21	TGATTGAGCCGTGCCAATATC	53898	4522.07		2814.55	0.622404	14278	3.15741	9982.17	2.20743		4920.77		6150.18	1.24984	5967.28	1.21267	5262.97	1.06954
osa-miR171c-3p	21	TGATTGAGCCGTGCCAATATC	53898	4522.07		2814.55	0.622404	14278	3.15741	9982.17	2.20743		4920.77		6150.18	1.24984	5967.28	1.21267	5262.97	1.06954
osa-miR169i-5p.2	22	TGGTGATAAGGGTGTAGCTCTG	6254.59	498.113		449.593	0.902591	936.539	1.88017	1142.77	2.29419		553.438		736.063	1.32998	1119.82	2.02339	818.253	1.47849
osa-miR159f	21	CTTGGATTGAAGGGAGCTCTA	17687.8	1147.02		1085.07	0.945991	3821.79	3.33193	2528.3	2.20424		2594.97		2731.39	1.05257	1960.2	0.755385	1819.02	0.70098
osa-miR160e-5p	21	TGCCTGGCTCCCTGTATGCCG	7355.87	534.356		571.397	1.06932	1613.98	3.02043	1213.32	2.27062		846.847		1064.44	1.25694	899.648	1.06235	611.884	0.722543
osa-miR172d-3p	21	AGAATCTTGATGATGCTGCAT	5354.26	230.181		159.771	0.694112	2105.59	9.14757	585.466	2.54351		593.835		691.899	1.16514	473.641	0.797598	513.879	0.865356
osa-miR172a	21	AGAATCTTGATGATGCTGCAT	5354.26	230.181		159.771	0.694112	2105.59	9.14757	585.466	2.54351		593.835		691.899	1.16514	473.641	0.797598	513.879	0.865356
osa-miR398b	21	TGTGTTCTCAGGTCGCCCCTG	1200.59	112.178		149.635	1.33391	97.6732	0.870698	231.37	2.06252		123.53		79.7652	0.645717	171.582	1.38899	234.858	1.90123
osa-miR169r-5p	21	TAGCCAAGGATGATTTGCCTG	155.525	15.7481		19.5849	1.24364	3.4575	0.21955	51.7732	3.28758		9.1425		9.9143	1.08442	20.5515	2.24791	25.3532	2.77311
osa-miR2877	24	TTGCATCCTCTGCACTTTGGGCCT	720.766	53.9317		57.2084	1.06076	66.34	1.23007	113.606	2.10648		116.939		111.461	0.953158	87.4635	0.747944	113.817	0.973304
osa-miR812h	24	AAGACGGATGATTAAAGTTGGACA	192.508	0.01		2.2334	223.34	0.8644	86.44	1.073	107.3		52.0908		24.6356	0.472936	30.907	0.593329	80.694	1.5491
osa-miR812j	24	AAGACGGATGATTAAAGTTGGACA	192.508	0.01		2.2334	223.34	0.8644	86.44	1.073	107.3		52.0908		24.6356	0.472936	30.907	0.593329	80.694	1.5491
osa-miR812i	24	AAGACGGATGATTAAAGTTGGACA	192.508	0.01		2.2334	223.34	0.8644	86.44	1.073	107.3		52.0908		24.6356	0.472936	30.907	0.593329	80.694	1.5491
osa-miR812g	24	AAGACGGATGATTAAAGTTGGACA	115.26	0.01		1.718	171.8	0.8644	86.44	1.073	107.3		29.9788		16.9745	0.566217	17.2059	0.573936	47.435	1.58228
osa-miR5811	24	CCTAACCTAGGAGTTCGATGGGAC	323.847	27.1816		16.3207	0.600432	122.308	4.49965	84.3661	3.10379		19.1354		22.9832	1.20108	10.8334	0.566144	20.7187	1.08274
osa-miR408-5p	21	CAGGGATGAGGCAGAGCATGG	157.003	4.746		23.1926	4.88677	7.7793	1.63913	26.6914	5.62398		12.9695		3.455	0.266394	23.1006	1.78115	55.0682	4.24598
osa-miR1864	24	TTGTAGTAACGTGATGGTCAATGT	109.993	9.7077		8.9334	0.920239	17.0712	1.75852	22.131	2.27974		13.1822		16.8243	1.27629	8.9216	0.676791	13.2218	1.003
osa-miR1865-5p	24	TGCTAGTGATGGTGATTCTTCGAC	159.629	9.7077		7.9027	0.814065	29.8206	3.07185	28.1668	2.90149		20.1985		25.0862	1.24198	19.1177	0.946491	19.6283	0.97177
osa-miR5145	24	ACCTGTTTGGATTCTTGAGGGCTA	173.261	18.7682		9.4488	0.503447	79.3054	4.22552	48.9565	2.60848		2.764		5.558	2.01085	4.7794	1.72916	3.6803	1.33151
osa-miR171a	21	TGATTGAGCCGCGCCAATATC	106.869	8.1976		6.8719	0.838282	29.3884	3.585	21.3263	2.60153		8.9299		11.1161	1.24482	13.5417	1.51644	7.4969	0.839528
miR7767-x	20	CCCAAGATGAGTGCTCTCCC	1071.13	56.7362		34.8748	0.614683	492.904	8.68764	140.968	2.48462		120.766		70.6019	0.584619	124.424	1.0303	29.8513	0.247184
miR397-x	22	TTGAGTGCAGCGTTGATGAACT	641.607	31.9276		11.1668	0.349754	42.57	1.33333	85.1709	2.66763		124.805		100.796	0.807622	137.488	1.10162	107.683	0.862807
miR5145-x	24	CCACCTGTTTGGATCCTTGAGAGC	472.063	35.3792		28.5183	0.806075	117.338	3.31657	88.39	2.49836		48.6889		61.1383	1.25569	44.7673	0.919456	47.8439	0.982645
miR393-x	20	TCCAAGGGATCGCATTGATC	309.297	25.8872		19.2413	0.743275	15.5586	0.601015	51.9073	2.00513		41.2474		47.6188	1.15447	47.3163	1.14713	60.5205	1.46726
miR156-y	23	GCTCACTGCTCTGTCTGTCATCC	170.263	12.9436		43.6364	3.37127	9.0758	0.701181	33.8001	2.61134		12.7569		10.8156	0.847824	14.6569	1.14894	32.5775	2.55372
miR5073-x	25	GTTTGGTGAATCGGAAACTTTTTTC	189.19	16.8267		12.8848	0.765735	31.3332	1.86211	40.2382	2.39133		16.584		31.5456	1.90217	24.3751	1.4698	15.4027	0.928769
miR399-y	19	TGCCAAAGGAGAGTTGCTT	116.346	7.5504		12.3694	1.63824	24.8505	3.29128	16.7659	2.22053		9.7803		18.3265	1.87382	17.8432	1.8244	8.86	0.905903
novel-m0267-5p	22	AATCGGTACTGCAGTAGCTCTT	1224.37	23.9457		27.1439	1.13356	238.781	9.97176	249.209	10.4072		259.603		158.329	0.609886	106.103	0.408713	161.252	0.621146
novel-m0301-5p	21	CGCCGCGATGGCCTTGACGGC	220.159	6.2561		2.4052	0.384457	17.2873	2.76327	14.0834	2.25115		32.5302		60.5374	1.86096	40.3065	1.23905	46.7534	1.43723
novel-m0271-3p	21	CTCCAGTGATGACTGAATTCA	174.004	7.119		7.5591	1.06182	34.1424	4.79595	31.9223	4.4841		20.4111		32.2966	1.58231	13.701	0.671252	26.8526	1.31559
novel-m0045-5p	20	TGTATGGTCTGGAGAAGCTT	166.45	4.746		2.577	0.542984	36.9516	7.78584	22.5334	4.74787		26.5769		30.7945	1.15869	20.8702	0.785276	21.4003	0.805222
											in total:34
																jn3h≥2
osa-miR166d-5p	21	GGAATGTTGTCTGGCTCGAGG	453.222	47.8914		87.2729	1.82231	14.0459	0.293286	28.5691	0.596539		48.2637		99.1432	2.0542	61.6546	1.27745	66.3817	1.3754
osa-miR1320-5p	21	TGGAACGGAGGAATTTTATAG	123.421	3.4516		53.9443	15.6288	7.131	2.066	4.5603	1.32121		3.8271		12.0174	3.14008	15.4535	4.03791	23.036	6.01918
osa-miR166b-5p	21	GGAATGTTGTCTGGCTCGGGG	228.387	22.2199		36.0774	1.62365	18.1517	0.816912	21.058	0.947709		20.6237		41.7603	2.02487	38.2354	1.85395	30.2602	1.46725
osa-miR5145	24	ACCTGTTTGGATTCTTGAGGGCTA	173.261	18.7682		9.4488	0.503447	79.3054	4.22552	48.9565	2.60848		2.764		5.558	2.01085	4.7794	1.72916	3.6803	1.33151
miR5160-y	24	GCGAGATCGACGTTATATTTCTGC	368.31	97.0771		192.928	1.98737	26.3631	0.271569	47.4811	0.489107		0.4252		1.352	3.17968	1.5931	3.74671	1.0905	2.56468
																in total:5
																		jn10h≥2
osa-miR169i-5p.2	22	TGGTGATAAGGGTGTAGCTCTG	6254.59	498.113		449.593	0.902591	936.539	1.88017	1142.77	2.29419		553.438		736.063	1.32998	1119.82	2.02339	818.253	1.47849
osa-miR169r-5p	21	TAGCCAAGGATGATTTGCCTG	155.525	15.7481		19.5849	1.24364	3.4575	0.21955	51.7732	3.28758		9.1425		9.9143	1.08442	20.5515	2.24791	25.3532	2.77311
osa-miR3980a-5p	21	AATCGACGGCCTCAGTCAGGG	678.213	229.102		195.161	0.851854	74.1193	0.323521	179.06	0.781574		0.01		0.01	1	0.4779	47.79	0.2726	27.26
osa-miR3980b-5p	21	AATCGACGGCCTCAGTCAGGG	678.213	229.102		195.161	0.851854	74.1193	0.323521	179.06	0.781574		0.01		0.01	1	0.4779	47.79	0.2726	27.26
osa-miR1320-5p	21	TGGAACGGAGGAATTTTATAG	123.421	3.4516		53.9443	15.6288	7.131	2.066	4.5603	1.32121		3.8271		12.0174	3.14008	15.4535	4.03791	23.036	6.01918
miR169-y	22	TGAGTCGCTCTTATCACTCATT	285.051	41.2038		28.3465	0.687958	26.3631	0.639822	46.6763	1.13282		23.8129		27.6399	1.16071	50.6619	2.1275	40.347	1.69433
miR5160-y	24	GCGAGATCGACGTTATATTTCTGC	368.31	97.0771		192.928	1.98737	26.3631	0.271569	47.4811	0.489107		0.4252		1.352	3.17968	1.5931	3.74671	1.0905	2.56468
																		in total:7
																				jn22h≥2
osa-miR169a	21	CAGCCAAGGATGACTTGCCGA	6627.16	1190.81		991.612	0.832719	613.267	0.514999	895.569	0.752065		621.475		355.413	0.571886	665.456	1.07077	1293.56	2.08143
osa-miR162a	21	TCGATAAACCTCTGCATCCAG	6614.01	884.696		2742.57	3.10001	187.567	0.212013	341.086	0.38554		541.319		395.371	0.730384	414.854	0.766377	1106.54	2.04416
osa-miR1432-5p	21	ATCAGGAGAGATGACACCGAC	1716.67	178.622		532.055	2.97867	40.193	0.225017	71.7582	0.401732		184.763		172.75	0.934979	139.878	0.757067	396.655	2.14683
osa-miR1850.1	21	TGGAAAGTTGGGAGATTGGGG	2661.62	291.447		217.323	0.74567	402.362	1.38057	400.102	1.37281		189.653		377.045	1.98808	344.915	1.81867	438.774	2.31356
osa-miR535-5p	21	TGACAACGAGAGAGAGCACGC	1723.83	182.073		911.899	5.00841	28.3079	0.155475	55.5288	0.30498		112.261		98.2419	0.87512	87.3042	0.777689	248.216	2.21106
osa-miR1320-3p	21	TGTAAAATTCATTCGTTCCAA	294.754	22.867		55.4904	2.42666	11.4528	0.500844	16.0953	0.703866		34.0185		27.4897	0.808081	28.5173	0.838288	98.8229	2.90498
osa-miR169r-5p	21	TAGCCAAGGATGATTTGCCTG	155.525	15.7481		19.5849	1.24364	3.4575	0.21955	51.7732	3.28758		9.1425		9.9143	1.08442	20.5515	2.24791	25.3532	2.77311
osa-miR3980a-5p	21	AATCGACGGCCTCAGTCAGGG	678.213	229.102		195.161	0.851854	74.1193	0.323521	179.06	0.781574		0.01		0.01	1	0.4779	47.79	0.2726	27.26
osa-miR3980b-5p	21	AATCGACGGCCTCAGTCAGGG	678.213	229.102		195.161	0.851854	74.1193	0.323521	179.06	0.781574		0.01		0.01	1	0.4779	47.79	0.2726	27.26
osa-miR1320-5p	21	TGGAACGGAGGAATTTTATAG	123.421	3.4516		53.9443	15.6288	7.131	2.066	4.5603	1.32121		3.8271		12.0174	3.14008	15.4535	4.03791	23.036	6.01918
osa-miR156l-5p	21	CGACAGAAGAGAGTGAGCATA	162.504	25.4558		75.9343	2.98299	8.4276	0.331068	10.3278	0.405715		7.4415		8.4121	1.13043	8.9216	1.1989	17.5837	2.36292
osa-miR408-5p	21	CAGGGATGAGGCAGAGCATGG	157.003	4.746		23.1926	4.88677	7.7793	1.63913	26.6914	5.62398		12.9695		3.455	0.266394	23.1006	1.78115	55.0682	4.24598
miR5160-y	24	GCGAGATCGACGTTATATTTCTGC	368.31	97.0771		192.928	1.98737	26.3631	0.271569	47.4811	0.489107		0.4252		1.352	3.17968	1.5931	3.74671	1.0905	2.56468
miR6478-x	20	CCGACCTTAGCTCAGTTGGA	279.894	79.3875		19.4131	0.244536	5.4023	0.0680498	12.2056	0.153747		27.64		18.1762	0.657605	32.3408	1.17007	85.3284	3.08713
miR156-y	23	GCTCACTGCTCTGTCTGTCATCC	170.263	12.9436		43.6364	3.37127	9.0758	0.701181	33.8001	2.61134		12.7569		10.8156	0.847824	14.6569	1.14894	32.5775	2.55372
miR156-x	22	CTTGACAGAAGAGAGTGAGCAC	111.091	7.5504		32.4696	4.30038	3.4575	0.457923	3.4873	0.46187		9.9929		4.9572	0.496072	8.2843	0.829019	40.8922	4.09213
novel-m0378-5p	22	AGGCTATTAAGTAACTCTAAAT	189.345	31.0647		49.6493	1.59825	6.4827	0.208684	10.4619	0.336778		19.1354		15.4723	0.808569	18.6398	0.9741	38.4387	2.00877
																				in total:17
							zy3h≤0.5
osa-miR169e	21	TAGCCAAGGATGACTTGCCGG	1854.47	636.826		230.723	0.362302	249.153	0.391242	290.788	0.456621		102.481		109.358	1.06711	157.721	1.53903	77.4226	0.755485
osa-miR5072	22	CGATTCCCCAGCGGAGTCGCCA	1957.48	339.123		123.522	0.36424	262.983	0.77548	119.373	0.352007		300.213		276.249	0.920176	355.271	1.1834	180.744	0.602051
osa-miR7695-5p	24	TGCCTATGTGGCACGCCACGTGAA	997.566	89.9581		37.1082	0.412505	363.681	4.04279	140.968	1.56704		87.385		101.547	1.16206	83.0027	0.949851	93.9158	1.07474
osa-miR1437b-3p	24	GTGCTGGCGAGCTCCGGTGCCGCA	566.701	128.789		47.9314	0.37217	101.779	0.790277	103.815	0.806083		35.5068		54.2283	1.52727	42.8555	1.20697	51.7968	1.45879
osa-miR2869	21	TCCCGACATTAAATTCTGGGC	298.226	62.5608		25.5978	0.409167	30.2528	0.483574	48.5541	0.776111		27.4274		26.1377	0.952978	37.7575	1.37663	39.9381	1.45614
osa-miR439e	21	TGTCGAACCGCGGTTGTTCGA	227.639	3.6674		1.2026	0.327916	1.0805	0.294623	2.6825	0.731445		47.2006		69.4002	1.47032	58.787	1.24547	43.6184	0.924107
osa-miR439b	21	TGTCGAACCGCGGTTGTTCGA	227.639	3.6674		1.2026	0.327916	1.0805	0.294623	2.6825	0.731445		47.2006		69.4002	1.47032	58.787	1.24547	43.6184	0.924107
osa-miR439h	21	TGTCGAACCGCGGTTGTTCGA	227.639	3.6674		1.2026	0.327916	1.0805	0.294623	2.6825	0.731445		47.2006		69.4002	1.47032	58.787	1.24547	43.6184	0.924107
osa-miR439c	21	TGTCGAACCGCGGTTGTTCGA	227.639	3.6674		1.2026	0.327916	1.0805	0.294623	2.6825	0.731445		47.2006		69.4002	1.47032	58.787	1.24547	43.6184	0.924107
osa-miR439g	21	TGTCGAACCGCGGTTGTTCGA	227.639	3.6674		1.2026	0.327916	1.0805	0.294623	2.6825	0.731445		47.2006		69.4002	1.47032	58.787	1.24547	43.6184	0.924107
osa-miR439a	21	TGTCGAACCGCGGTTGTTCGA	227.639	3.6674		1.2026	0.327916	1.0805	0.294623	2.6825	0.731445		47.2006		69.4002	1.47032	58.787	1.24547	43.6184	0.924107
osa-miR439f	21	TGTCGAACCGCGGTTGTTCGA	227.639	3.6674		1.2026	0.327916	1.0805	0.294623	2.6825	0.731445		47.2006		69.4002	1.47032	58.787	1.24547	43.6184	0.924107
osa-miR439d	21	TGTCGAACCGCGGTTGTTCGA	217.569	2.5887		0.6872	0.265461	1.0805	0.417391	2.4143	0.93263		45.9249		68.1985	1.485	55.9193	1.21762	40.7559	0.887447
osa-miR2880	24	ACGGTATCCCGTTCGGACAGGATG	113.308	14.4537		5.1539	0.35658	14.9103	1.03159	22.131	1.53117		13.3948		15.3221	1.14388	12.2672	0.915818	15.6754	1.17026
miR5054-y	19	TTCCCCACGGACGGCGCCA	2219.08	398.232		140.53	0.352885	388.532	0.975643	171.817	0.43145		339.972		325.971	0.958816	303.812	0.893639	150.211	0.441833
miR397-x	22	TTGAGTGCAGCGTTGATGAACT	641.607	31.9276		11.1668	0.349754	42.57	1.33333	85.1709	2.66763		124.805		100.796	0.807622	137.488	1.10162	107.683	0.862807
miR6478-x	20	CCGACCTTAGCTCAGTTGGA	279.894	79.3875		19.4131	0.244536	5.4023	0.0680498	12.2056	0.153747		27.64		18.1762	0.657605	32.3408	1.17007	85.3284	3.08713
novel-m0248-5p	21	CCCGCCACCGGCGCCGCTTCC	445.824	115.198		40.8877	0.354933	76.9284	0.667792	24.2771	0.210742		57.8314		47.0179	0.813017	57.5125	0.994486	26.171	0.45254
novel-m0601-3p	22	GGACCGATTTATCGGATTGGGA	370.543	72.4842		24.3952	0.336559	38.2481	0.527675	42.3843	0.584738		49.5394		50.3227	1.01581	51.4585	1.03874	41.7101	0.841958
novel-m0104-3p	22	GGACCGATTTATCGGATTGGGA	370.543	72.4842		24.3952	0.336559	38.2481	0.527675	42.3843	0.584738		49.5394		50.3227	1.01581	51.4585	1.03874	41.7101	0.841958
novel-m0362-3p	22	GGACCGATTTATCGGATTGGGA	370.543	72.4842		24.3952	0.336559	38.2481	0.527675	42.3843	0.584738		49.5394		50.3227	1.01581	51.4585	1.03874	41.7101	0.841958
novel-m0032-3p	22	GGACCGATTTATCGGATTGGGA	366.308	72.0528		24.0516	0.333805	37.8159	0.524836	41.5795	0.57707		49.1142		49.5716	1.00931	50.8213	1.03476	41.3011	0.84092
novel-m0664-3p	21	GGCCTTGACGGCGAGCGCGGC	220.946	11.6493		2.4052	0.206467	9.2919	0.797636	6.1699	0.529637		42.3105		52.2755	1.23552	48.5909	1.14844	48.2528	1.14045
novel-m0301-5p	21	CGCCGCGATGGCCTTGACGGC	220.159	6.2561		2.4052	0.384457	17.2873	2.76327	14.0834	2.25115		32.5302		60.5374	1.86096	40.3065	1.23905	46.7534	1.43723
							in total:24
									zy10h≤0.5
osa-miR168a-5p	21	TCGCTTGGTGCAGATCGGGAC	1.08505e+06	172689		178446	1.03334	75274.3	0.435896	144003	0.833888		96456.4		121173	1.25625	147492	1.5291	149517	1.5501
osa-miR396f-5p	22	TCTCCACAGGCTTTCTTGAACT	967501	174383		203573	1.16739	58337.5	0.334537	76257.9	0.437302		132856		84319.8	0.634669	122621	0.922957	115153	0.866751
osa-miR396e-5p	21	TCCACAGGCTTTCTTGAACTG	966645	174228		203379	1.16731	58304.6	0.334645	76190.5	0.437303		132751		84229.5	0.634491	122512	0.922866	115050	0.86666
osa-miR167f	21	TGAAGCTGCCAGCATGATCTG	461000	111325		102064	0.916811	37715.7	0.338789	42474	0.381532		46234.7		32265.5	0.697864	46336.4	1.0022	42585.2	0.921064
osa-miR167j	21	TGAAGCTGCCAGCATGATCTG	460855	111319		102061	0.916832	37698.4	0.338651	42451.2	0.381346		46213.9		32238.1	0.697584	46309.3	1.00206	42563.5	0.921011
osa-miR167d-5p	21	TGAAGCTGCCAGCATGATCTG	460855	111319		102061	0.916832	37698.4	0.338651	42451.2	0.381346		46213.9		32238.1	0.697584	46309.3	1.00206	42563.5	0.921011
osa-miR167h-5p	21	TGAAGCTGCCAGCATGATCTG	460778	111304		102042	0.916792	37691.5	0.338637	42445.8	0.381352		46205.6		32233.5	0.697611	46300.9	1.00206	42554.8	0.920987
osa-miR167g	21	TGAAGCTGCCAGCATGATCTG	460683	111283		102039	0.916931	37679.2	0.338588	42432.3	0.381299		46191.6		32222.1	0.697576	46286.7	1.00206	42549	0.921143
osa-miR166c-3p	21	TCGGACCAGGCTTCATTCCCC	77596.2	12002.6		31949.3	2.66186	2247.13	0.18722	4012.42	0.334296		7576.34		4679.86	0.617694	7086.46	0.935341	8042.14	1.06148
osa-miR166j-3p	21	TCGGACCAGGCTTCATTCCCC	77547.4	11989.5		31930.5	2.66322	2245.4	0.187282	4011.48	0.334584		7572.51		4677.3	0.617669	7082	0.935224	8038.73	1.06157
osa-miR166a-3p	21	TCGGACCAGGCTTCATTCCCC	76277	11453.8		32199.6	2.81126	2190.52	0.191248	3918.26	0.342093		7222.12		4505.16	0.623799	6806.86	0.942502	7980.66	1.10503
osa-miR166d-3p	21	TCGGACCAGGCTTCATTCCCC	76277	11453.8		32199.6	2.81126	2190.52	0.191248	3918.26	0.342093		7222.12		4505.16	0.623799	6806.86	0.942502	7980.66	1.10503
osa-miR166f	21	TCGGACCAGGCTTCATTCCCC	76277	11453.8		32199.6	2.81126	2190.52	0.191248	3918.26	0.342093		7222.12		4505.16	0.623799	6806.86	0.942502	7980.66	1.10503
osa-miR166b-3p	21	TCGGACCAGGCTTCATTCCCC	76226.1	11447.8		32178.6	2.81091	2190.52	0.191349	3916.39	0.342109		7213.19		4503.5	0.624342	6804.15	0.943293	7971.94	1.10519
osa-miR156d	20	TGACAGAAGAGAGTGAGCAC	62282.2	5338.81		26221	4.9114	2306.56	0.432036	2580.88	0.483419		6957.42		3505.91	0.50391	4649.11	0.668224	10722.5	1.54116
osa-miR156f-5p	20	TGACAGAAGAGAGTGAGCAC	62157.4	5330.61		26164	4.90826	2303.32	0.432092	2574.84	0.48303		6942.96		3499.3	0.504007	4640.51	0.668376	10701.9	1.5414
osa-miR156j-5p	20	TGACAGAAGAGAGTGAGCAC	62157.4	5330.61		26164	4.90826	2303.32	0.432092	2574.84	0.48303		6942.96		3499.3	0.504007	4640.51	0.668376	10701.9	1.5414
osa-miR156h-5p	20	TGACAGAAGAGAGTGAGCAC	62157.4	5330.61		26164	4.90826	2303.32	0.432092	2574.84	0.48303		6942.96		3499.3	0.504007	4640.51	0.668376	10701.9	1.5414
osa-miR168a-3p	24	GATCCCGCCTTGCACCAAGTGAAT	42013.4	5151.56		19841.9	3.85163	2183.17	0.423788	2269.57	0.44056		3325.94		1911.51	0.574727	2769.84	0.832798	4559.89	1.37101
osa-miR396c-5p	21	TTCCACAGCTTTCTTGAACTT	68296.7	11719.8		21485.6	1.83328	3094.21	0.264016	4396.43	0.375128		7604.19		4887.16	0.642692	6603.74	0.868434	8505.58	1.11854
osa-miR169c	21	CAGCCAAGGATGACTTGCCGG	37265.5	14273.4		7923.62	0.555134	2551.6	0.178767	4295.97	0.300978		2482.29		1521.25	0.612841	2156.16	0.868619	2061.24	0.83038
osa-miR169b	21	CAGCCAAGGATGACTTGCCGG	35512.2	13631.6		7759.39	0.569222	2298.78	0.168636	3992.17	0.292862		2393.84		1416.7	0.591809	2007.2	0.838486	2012.58	0.840733
osa-miR5794	21	TGAGGAATCACTAGTAGTCGT	21651.2	4052.86		9915.61	2.44657	1336.74	0.329826	1435.83	0.354277		1201.7		841.816	0.700519	1062.63	0.884267	1804.03	1.50123
osa-miR156b-5p	20	TGACAGAAGAGAGTGAGCAC	23437.5	2121.67		10174.7	4.79559	935.458	0.440906	1025.81	0.483489		2392.56		1274.14	0.532542	1797.86	0.751438	3715.33	1.55287
osa-miR156c-5p	20	TGACAGAAGAGAGTGAGCAC	23436.3	2121.67		10173.5	4.79502	935.458	0.440906	1025.81	0.483489		2392.56		1274.14	0.532542	1797.86	0.751438	3715.33	1.55287
osa-miR156g-5p	20	TGACAGAAGAGAGTGAGCAC	23436.3	2121.67		10173.5	4.79502	935.458	0.440906	1025.81	0.483489		2392.56		1274.14	0.532542	1797.86	0.751438	3715.33	1.55287
osa-miR156a	20	TGACAGAAGAGAGTGAGCAC	23317.7	2109.16		10128.5	4.80213	931.785	0.44178	1021.25	0.484195		2377.68		1265.58	0.532274	1789.42	0.75259	3694.34	1.55376
osa-miR156i	20	TGACAGAAGAGAGTGAGCAC	23317.7	2109.16		10128.5	4.80213	931.785	0.44178	1021.25	0.484195		2377.68		1265.58	0.532274	1789.42	0.75259	3694.34	1.55376
osa-miR156e	20	TGACAGAAGAGAGTGAGCAC	23317.7	2109.16		10128.5	4.80213	931.785	0.44178	1021.25	0.484195		2377.68		1265.58	0.532274	1789.42	0.75259	3694.34	1.55376
osa-miR167b	21	TGAAGCTGCCAGCATGATCTA	21268	3392.52		3664.09	1.08005	1491.46	0.439632	1348.11	0.397378		2796.53		2401.37	0.858695	3012.31	1.07716	3161.65	1.13056
osa-miR167c-5p	21	TGAAGCTGCCAGCATGATCTA	21087	3343.77		3623.2	1.08357	1474.39	0.440937	1331.35	0.398158		2781.65		2390.85	0.859509	2997.02	1.07743	3144.75	1.13053
osa-miR167a-5p	21	TGAAGCTGCCAGCATGATCTA	21087	3343.77		3623.2	1.08357	1474.39	0.440937	1331.35	0.398158		2781.65		2390.85	0.859509	2997.02	1.07743	3144.75	1.13053
osa-miR166l-3p	21	TCGGACCAGGCTTCAATCCCT	12689.8	2057.17		5601.1	2.72272	539.796	0.262397	668.357	0.324891		1006.95		590.653	0.586578	1077.92	1.07048	1147.84	1.13993
osa-miR166k-3p	21	TCGGACCAGGCTTCAATCCCT	12560.4	2032.58		5554.89	2.73293	536.338	0.263871	661.114	0.325259		996.104		582.391	0.584669	1063.9	1.06806	1133.12	1.13756
osa-miR166g-3p	21	TCGGACCAGGCTTCATTCCTC	13633.8	1821.6		5536.85	3.03956	450.334	0.247219	692.902	0.380382		1357.12		871.709	0.64232	1222.74	0.900976	1680.53	1.2383
osa-miR393b-3p	21	TCAGTGCAATCCCTTTGGAAT	10944.2	1479.45		3189.93	2.15615	593.386	0.401084	993.079	0.671247		1362.23		871.709	0.639914	1356.08	0.99549	1098.37	0.806301
osa-miR156h-3p	22	GCTCACTTCTCTTTCTGTCAGC	10626.2	1060.08		1243.64	1.17315	312.468	0.294758	443.693	0.418546		2530.97		1538.82	0.607996	1810.93	0.715505	1685.58	0.66598
osa-miR156f-3p	22	GCTCACTTCTCTTTCTGTCAGC	10626.2	1060.08		1243.64	1.17315	312.468	0.294758	443.693	0.418546		2530.97		1538.82	0.607996	1810.93	0.715505	1685.58	0.66598
osa-miR156l-3p	22	GCTCACTTCTCTTTCTGTCAGC	10355.3	1029.66		1178.87	1.14491	309.226	0.300318	437.121	0.424528		2451.24		1497.81	0.611042	1782.41	0.727144	1668.95	0.680858
osa-miR1862d	24	ACTAGGTTTGTTTATTTTGGGACG	8761.79	1297.38		4139.62	3.19075	427.644	0.329621	753.662	0.58091		570.022		402.581	0.706255	498.335	0.874238	672.541	1.17985
osa-miR827	21	TTAGATGACCATCAGCAAACA	30042.4	3617.96		4715.14	1.30326	1718.36	0.474952	2854.1	0.78887		6237.71		2642.17	0.423579	3564.02	0.571366	4692.93	0.752347
osa-miR156g-3p	22	GCTCACTTCTCTCTCTGTCAGC	9363.56	1681.81		2479.55	1.47434	631.418	0.37544	810.666	0.482021		1026.3		770.012	0.750283	985.678	0.960423	978.142	0.953081
osa-miR156c-3p	22	GCTCACTTCTCTCTCTGTCAGC	9357.35	1681.38		2477.66	1.47359	631.418	0.375537	810.398	0.481985		1025.66		768.96	0.749725	984.562	0.959933	977.324	0.952876
osa-miR162a	21	TCGATAAACCTCTGCATCCAG	6614.01	884.696		2742.57	3.10001	187.567	0.212013	341.086	0.38554		541.319		395.371	0.730384	414.854	0.766377	1106.54	2.04416
osa-miR166h-3p	21	TCGGACCAGGCTTCATTCCTC	6682.4	964.731		2421.99	2.51054	239.429	0.248182	329.819	0.341877		764.991		453.204	0.592431	669.12	0.874677	839.109	1.09689
osa-miR1432-5p	21	ATCAGGAGAGATGACACCGAC	1716.67	178.622		532.055	2.97867	40.193	0.225017	71.7582	0.401732		184.763		172.75	0.934979	139.878	0.757067	396.655	2.14683
osa-miR2871a-3p	21	TATTTTAGTTTCTATGGTCAC	4285.72	808.329		922.55	1.14131	261.47	0.32347	460.594	0.56981		429.696		402.281	0.936199	492.918	1.14713	507.881	1.18196
osa-miR2871b	21	TATTTTAGTTTCTATGGTCAC	4282.25	807.897		922.722	1.14213	260.822	0.322841	460.459	0.569948		430.121		401.38	0.933178	491.644	1.14304	507.2	1.1792
osa-miR1863a	24	AGCTCTGATACCATGTTAGATTAG	5368.15	1044.77		788.377	0.754597	182.597	0.174773	479.64	0.459088		899.576		410.843	0.456708	699.39	0.777466	862.962	0.959299
osa-miR1862e	24	CTAGATTTGTTTATTTTGGGACGG	3013.46	424.335		1126.3	2.65428	135.489	0.319298	233.65	0.550627		318.923		203.394	0.637751	259.364	0.813248	312.008	0.978316
osa-miR166m	21	TCGGACCAGGCTTCATTCCCT	2880.49	463.813		1143.65	2.46576	102.859	0.221769	165.379	0.356564		270.872		188.522	0.695982	276.729	1.02162	268.662	0.99184
osa-miR395d	21	GTGAAGTGTTTGGGGGAACTC	1336.68	273.542		410.423	1.5004	84.4916	0.30888	108.375	0.396192		103.756		108.006	1.04096	117.096	1.12857	130.991	1.26249
osa-miR395y	21	GTGAAGTGTTTGGGGGAACTC	1336.41	273.542		410.423	1.5004	84.4916	0.30888	108.107	0.395211		103.756		108.006	1.04096	117.096	1.12857	130.991	1.26249
osa-miR395s	21	GTGAAGTGTTTGGGGGAACTC	1336.41	273.542		410.423	1.5004	84.4916	0.30888	108.107	0.395211		103.756		108.006	1.04096	117.096	1.12857	130.991	1.26249
osa-miR395g	21	GTGAAGTGTTTGGGGGAACTC	1336.41	273.542		410.423	1.5004	84.4916	0.30888	108.107	0.395211		103.756		108.006	1.04096	117.096	1.12857	130.991	1.26249
osa-miR395e	21	GTGAAGTGTTTGGGGGAACTC	1336.41	273.542		410.423	1.5004	84.4916	0.30888	108.107	0.395211		103.756		108.006	1.04096	117.096	1.12857	130.991	1.26249
osa-miR395k	21	GTGAAGTGTTTGGGGGAACTC	1336.39	273.973		410.423	1.49804	84.4916	0.308394	108.375	0.395568		103.756		108.006	1.04096	116.777	1.1255	130.583	1.25855
osa-miR395i	21	GTGAAGTGTTTGGGGGAACTC	1336.39	273.973		410.423	1.49804	84.4916	0.308394	108.375	0.395568		103.756		108.006	1.04096	116.777	1.1255	130.583	1.25855
osa-miR395j	21	GTGAAGTGTTTGGGGGAACTC	1335.69	273.542		410.423	1.5004	84.4916	0.30888	108.107	0.395211		103.756		108.006	1.04096	116.777	1.1255	130.583	1.25855
osa-miR395b	21	GTGAAGTGTTTGGGGGAACTC	1335.33	273.973		409.908	1.49616	84.4916	0.308394	107.838	0.393609		103.756		108.006	1.04096	116.777	1.1255	130.583	1.25855
osa-miR395h	21	GTGAAGTGTTTGGGGGAACTC	1334.9	273.542		409.908	1.49852	84.4916	0.30888	107.838	0.39423		103.756		108.006	1.04096	116.777	1.1255	130.583	1.25855
osa-miR2878-5p	24	TACATGTATAAAATTCTGAGGATG	4100.88	641.788		470.38	0.732922	115.825	0.180472	360.4	0.561557		705.458		536.575	0.760605	576.24	0.816831	694.214	0.984061
osa-miR395r	21	GTGAAGTGTTTGGGGGAACTC	1279.45	253.479		388.261	1.53173	80.1698	0.316278	101.937	0.402151		102.481		107.105	1.04512	115.981	1.13173	130.037	1.2689
osa-miR395q	21	GTGAAGTGTTTGGGGGAACTC	1279.45	253.479		388.261	1.53173	80.1698	0.316278	101.937	0.402151		102.481		107.105	1.04512	115.981	1.13173	130.037	1.2689
osa-miR395n	21	GTGAAGTGTTTGGGGGAACTC	1279.18	253.479		388.261	1.53173	80.1698	0.316278	101.669	0.401093		102.481		107.105	1.04512	115.981	1.13173	130.037	1.2689
osa-miR395l	21	GTGAAGTGTTTGGGGGAACTC	1279.18	253.479		388.261	1.53173	80.1698	0.316278	101.669	0.401093		102.481		107.105	1.04512	115.981	1.13173	130.037	1.2689
osa-miR395p	21	GTGAAGTGTTTGGGGGAACTC	1279.18	253.479		388.261	1.53173	80.1698	0.316278	101.669	0.401093		102.481		107.105	1.04512	115.981	1.13173	130.037	1.2689
osa-miR395m	21	GTGAAGTGTTTGGGGGAACTC	1278.4	253.479		387.746	1.5297	80.1698	0.316278	101.4	0.400034		102.481		107.105	1.04512	115.981	1.13173	130.037	1.2689
osa-miR5144-5p	21	TTCTTGTGCTGCTGAAGAGAC	3013.43	722.901		655.062	0.906158	341.856	0.472895	361.876	0.500588		200.922		205.346	1.02202	276.57	1.37651	248.897	1.23878
osa-miR169e	21	TAGCCAAGGATGACTTGCCGG	1854.47	636.826		230.723	0.362302	249.153	0.391242	290.788	0.456621		102.481		109.358	1.06711	157.721	1.53903	77.4226	0.755485
osa-miR396f-3p	24	ATAGTTCAAGAAAGTCCTTGGAAA	2531.19	431.454		514.532	1.19255	183.894	0.426219	188.449	0.436777		389.937		228.029	0.584785	330.736	0.84818	264.164	0.677453
osa-miR535-5p	21	TGACAACGAGAGAGAGCACGC	1723.83	182.073		911.899	5.00841	28.3079	0.155475	55.5288	0.30498		112.261		98.2419	0.87512	87.3042	0.777689	248.216	2.21106
osa-miR810b.2	21	AAGTGATTTAATTATGCCGTT	1632.7	344.947		460.244	1.33425	57.2642	0.166009	88.9265	0.257797		201.134		139.702	0.694569	128.248	0.637624	212.231	1.05517
osa-miR810b.1	21	TGAACACCGATATGCGTCATC	1122.26	189.624		363.866	1.91888	55.3193	0.291732	50.566	0.266665		139.688		69.8509	0.500048	82.6841	0.591918	170.657	1.2217
osa-miR156b-3p	21	GCTCACTCTCTATCTGTCAGC	2426.79	554.202		955.707	1.72447	240.293	0.433584	249.343	0.449913		111.836		90.8812	0.812631	128.567	1.1496	95.9604	0.858047
osa-miR396a-5p	21	TTCCACAGCTTTCTTGAACTG	2291.76	328.121		328.132	1.00004	162.068	0.493929	200.923	0.612345		321.262		292.172	0.909451	318.31	0.990811	340.769	1.06072
osa-miR396b-5p	21	TTCCACAGCTTTCTTGAACTG	2291.76	328.121		328.132	1.00004	162.068	0.493929	200.923	0.612345		321.262		292.172	0.909451	318.31	0.990811	340.769	1.06072
osa-miR408-3p	21	CTGCACTGCCTCTTCCCTGGC	2185.04	214.001		219.213	1.02435	65.9078	0.307979	141.639	0.661859		462.864		299.533	0.647129	363.555	0.785447	418.327	0.903781
osa-miR5339	21	CAGATAGAGAATCTTCTCAGA	1546.68	338.044		194.131	0.574276	55.7515	0.164924	104.888	0.310278		224.735		137.899	0.613609	191.496	0.852098	299.74	1.33375
osa-miR5150-3p	24	AGAAGCTGCAGCTGTCAGAAGCTC	1444.96	287.78		319.027	1.10858	96.8088	0.336399	115.35	0.400826		188.377		108.457	0.575741	148.959	0.790748	180.198	0.956582
osa-miR156j-3p	22	GCTCGCTCCTCTTTCTGTCAGC	1160.75	206.666		565.384	2.73573	79.0894	0.382691	99.6567	0.482211		61.8711		42.0607	0.679812	50.8213	0.821406	55.2045	0.89225
osa-miR1423-5p	24	AGGCAACTACACGTTGGGCGCTCG	1151.48	178.19		246.529	1.38351	37.1677	0.208584	93.4868	0.524646		157.761		121.826	0.77222	108.652	0.688716	207.869	1.31762
osa-miR1883a	24	ACCTGTGACGGGCCGAGAATGGAA	1040.7	203.862		250.308	1.22783	63.3147	0.310576	113.204	0.555295		88.448		104.401	1.18036	103.076	1.16539	114.089	1.2899
osa-miR167h-3p	21	AGGTCATGCTGTAGTTTCATC	454.844	37.105		212.341	5.72271	12.9655	0.349427	9.9254	0.267495		72.5019		39.6573	0.546983	32.1815	0.443871	38.1661	0.526415
osa-miR2090	22	AACTCTGATTCTAGAATTTTTG	920.373	121.454		133.143	1.09624	60.2894	0.496396	71.8923	0.591929		142.878		92.6838	0.648694	148.64	1.04033	149.393	1.0456
osa-miR2878-3p	24	CAGGATTTTATACATGTAAAGAAT	760.158	166.325		183.136	1.10107	28.0918	0.168897	47.4811	0.285471		114.6		54.9794	0.479751	75.037	0.654774	90.5081	0.789775
osa-miR1876	24	ATAAGTGGGTTTGTGGGCTGGCCC	747.656	84.1335		367.13	4.36366	35.4389	0.421222	47.347	0.56276		51.8782		41.0092	0.79049	35.5271	0.684818	85.1921	1.64216
osa-miR535-3p	21	GTGCTTTCTCCCGTTGTCACT	674.587	130.946		262.506	2.00469	30.0367	0.229382	28.5691	0.218174		68.8874		54.5287	0.791563	47.3163	0.686864	51.7968	0.751905
osa-miR166j-5p	21	GAATGACGTCCGGTCTGAAGA	991.239	271.6		171.625	0.631904	46.8918	0.17265	39.7017	0.146177		211.978		82.9197	0.391172	75.1963	0.354737	91.326	0.430828
osa-miR169r-5p	21	TAGCCAAGGATGATTTGCCTG	155.525	15.7481		19.5849	1.24364	3.4575	0.21955	51.7732	3.28758		9.1425		9.9143	1.08442	20.5515	2.24791	25.3532	2.77311
osa-miR1425-3p	21	CAGCAAGAACTGGATCTTAAT	486.527	58.8934		155.304	2.63704	26.5792	0.45131	18.1072	0.307457		50.8151		39.9577	0.786335	47.3163	0.931146	89.554	1.76235
osa-miR1862b	24	ACGAGGTTGGTTTATTTTGGGACG	701.48	69.2483		319.371	4.61196	24.6344	0.35574	40.3724	0.583009		65.9108		44.314	0.672333	52.5737	0.797649	85.0558	1.29047
osa-miR1862c	24	ACGAGGTTGGTTTATTTTGGGACG	701.48	69.2483		319.371	4.61196	24.6344	0.35574	40.3724	0.583009		65.9108		44.314	0.672333	52.5737	0.797649	85.0558	1.29047
osa-miR1862a	24	ACGAGGTTGGTTTATTTTGGGACG	701.48	69.2483		319.371	4.61196	24.6344	0.35574	40.3724	0.583009		65.9108		44.314	0.672333	52.5737	0.797649	85.0558	1.29047
osa-miR162b	21	TCGATAAGCCTCTGCATCCAG	937.614	141.517		132.284	0.934756	35.4389	0.250422	107.168	0.75728		107.158		151.268	1.41164	114.069	1.06449	148.711	1.38777
osa-miR3980a-5p	21	AATCGACGGCCTCAGTCAGGG	678.213	229.102		195.161	0.851854	74.1193	0.323521	179.06	0.781574		0.01		0.01	1	0.4779	47.79	0.2726	27.26
osa-miR3980b-5p	21	AATCGACGGCCTCAGTCAGGG	678.213	229.102		195.161	0.851854	74.1193	0.323521	179.06	0.781574		0.01		0.01	1	0.4779	47.79	0.2726	27.26
osa-miR166i-3p	21	TCGGATCAGGCTTCATTCCTC	585.28	83.9178		201.174	2.39728	18.1517	0.216303	26.9596	0.321262		68.2496		49.5716	0.726328	59.4242	0.870689	77.8315	1.14039
osa-miR1878	24	ACTTAATCTGGACACTATAAAAGA	563.685	63.208		278.998	4.41397	14.9103	0.235893	23.7406	0.375595		45.0745		28.391	0.629868	23.8971	0.530169	85.4647	1.89608
osa-miR1883b	24	ACCTGTGACGGGCCGAGAATGGAA	584.077	110.668		119.227	1.07734	37.1677	0.335849	59.5526	0.53812		53.1539		76.0098	1.42999	68.1865	1.28281	60.1116	1.1309
osa-miR166i-5p	21	AATGCAGTTTGATCCAAGATC	447.072	49.4015		90.1934	1.82572	11.6689	0.236205	24.4112	0.494139		68.2496		49.7218	0.728529	56.2379	0.824003	97.1872	1.424
osa-miR1857-3p	21	TCATGCTCCAAGAAAACCAGG	333.828	56.9519		137.781	2.41926	9.2919	0.163153	13.5469	0.237866		29.3409		22.0819	0.752598	23.2599	0.792747	41.5738	1.41692
osa-miR169o	21	TAGCCAAGAATGACTTGCCTA	192.756	31.2804		25.9414	0.829318	12.3172	0.393767	13.681	0.437367		34.8689		18.026	0.516965	27.88	0.799566	28.7609	0.82483
osa-miR169n	21	TAGCCAAGAATGACTTGCCTA	193.024	31.2804		25.9414	0.829318	12.3172	0.393767	13.9493	0.445944		34.8689		18.026	0.516965	27.88	0.799566	28.7609	0.82483
osa-miR166d-5p	21	GGAATGTTGTCTGGCTCGAGG	453.222	47.8914		87.2729	1.82231	14.0459	0.293286	28.5691	0.596539		48.2637		99.1432	2.0542	61.6546	1.27745	66.3817	1.3754
osa-miR1849	21	TATCGTATCCTAGGTTGGTTT	314.917	61.6979		102.219	1.65677	20.0965	0.325724	25.8866	0.41957		30.8292		21.0304	0.682158	23.5785	0.764811	29.5787	0.959438
osa-miR1860-3p	22	ATCTGGAAGCTAGGTTTTCTCT	268.639	62.9922		75.4189	1.19727	14.6942	0.23327	19.8509	0.315133		28.4905		15.3221	0.537797	15.6128	0.548	36.2578	1.27263
osa-miR167e-3p	21	AGATCATGTTGCAGCTTCACT	197.387	14.238		101.189	7.10693	5.8345	0.409784	4.8286	0.339135		24.4508		9.7641	0.399337	16.0907	0.658085	20.9913	0.858512
osa-miR167i-3p	21	AGATCATGTTGCAGCTTCACT	197.387	14.238		101.189	7.10693	5.8345	0.409784	4.8286	0.339135		24.4508		9.7641	0.399337	16.0907	0.658085	20.9913	0.858512
osa-miR396e-3p	24	ATGGTTCAAGAAAGCCCATGGAAA	190.317	20.0626		75.0753	3.74205	9.7241	0.484688	6.1699	0.307532		26.7896		12.6182	0.471011	16.5687	0.618475	23.3086	0.870062
osa-miR1870-3p	24	TTTAGGGCTAATTCAGCATGAACA	290.679	70.7584		100.845	1.4252	10.8046	0.152697	14.4858	0.204722		25.3012		15.923	0.629338	20.3922	0.805978	32.1686	1.27143
osa-miR5150-5p	24	AGCTTCTGACAGCTGCAGTTTCTC	341.906	47.2442		105.827	2.24	19.8804	0.420801	26.289	0.556449		46.1376		24.4854	0.530704	26.9241	0.583561	45.1178	0.977897
osa-miR530-3p	21	AGGTGCAGAGGCAGATGCAAC	229.641	14.6694		15.8053	1.07743	4.9701	0.338807	13.5469	0.92348		55.9179		54.679	0.977844	32.0222	0.572665	38.0298	0.680101
osa-miR1873	24	TCAACATGGTATCAGAGCTGGAAG	196.412	18.1211		103.937	5.7357	6.2666	0.345818	4.5603	0.251657		13.6074		15.3221	1.12601	11.152	0.819554	23.4449	1.72295
osa-miR1437a	22	TCCGGCGCCGCACTAGGCACTG	226.444	47.4599		40.7159	0.857901	15.7747	0.33238	17.7048	0.373048		31.4671		18.9273	0.601495	17.0466	0.541728	37.3482	1.1869
osa-miR2869	21	TCCCGACATTAAATTCTGGGC	298.226	62.5608		25.5978	0.409167	30.2528	0.483574	48.5541	0.776111		27.4274		26.1377	0.952978	37.7575	1.37663	39.9381	1.45614
osa-miR1863c	24	TAGAAACTTGGCTGATGCATTACT	188.477	26.9659		85.5549	3.17271	6.0506	0.22438	6.9746	0.258645		18.9228		10.0645	0.531872	14.179	0.749308	19.7646	1.04449
osa-miR2864.1	21	TTTTGCTGCCCTTGTTTTGCA	122.086	20.4941		46.3852	2.26334	5.6184	0.274147	8.45	0.412314		11.2686		6.6095	0.586541	10.9927	0.975516	12.2677	1.08866
osa-miR5542	21	TTTGAGAAGGTATCATGAGAT	195.511	47.0285		106.171	2.25758	22.6896	0.482465	19.5826	0.416399		0.01		0.01	1	0.01	1	0.01	1
osa-miR390-5p	21	AAGCTCAGGAGGGATAGCGCC	176.93	23.73		70.4368	2.96826	6.9149	0.291399	9.6572	0.406962		16.1588		13.0689	0.808779	13.3824	0.82818	23.5812	1.45934
osa-miR1423-3p	21	AGCGCCCAAGCGGTAGTTGTC	181.071	34.3006		47.5878	1.38738	3.8896	0.113397	10.8643	0.316738		22.5372		12.0174	0.533225	16.8873	0.749308	32.9864	1.46364
osa-miR1856	21	TATGCGTAAGACGGATTCGTA	106.288	16.8267		28.8619	1.71524	3.8896	0.231156	4.9627	0.29493		12.5443		11.7169	0.934042	10.9927	0.87631	16.4932	1.3148
osa-miR5513	21	TAACAAAGGACAACAGACTGA	120.084	26.103		38.3107	1.46767	4.754	0.182125	5.6334	0.215814		11.4812		5.4078	0.471013	10.6741	0.929702	17.72	1.54339
osa-miR1863b.2	23	AGAGACTTGGCTGATGCATTACT	172.639	36.0264		73.3573	2.03621	7.9954	0.221932	11.6691	0.323904		11.4812		9.1632	0.798105	13.5417	1.17947	9.4052	0.819183
osa-miR2874	24	ATGTGAACAGTGTCAAACAGTGTC	210.423	43.7926		28.1747	0.643367	12.3172	0.281262	21.058	0.480857		27.2148		21.0304	0.772756	22.6226	0.831261	34.2132	1.25715
osa-miR7694-5p	24	AACCTAGTACTGGATTAGTCACCA	131.894	22.6513		50.6801	2.2374	5.6184	0.248039	5.6334	0.248701		12.9695		7.8113	0.602282	10.0368	0.773877	16.4932	1.27169
osa-miR1846d-5p	22	TCCCACCGAGCAGCCGGATCTC	100.679	14.8852		38.1389	2.5622	3.2414	0.21776	5.231	0.351423		11.6939		6.0087	0.513832	6.2133	0.531328	15.2664	1.3055
osa-miR2118o	22	CTCCTGATGCCTCCCAAGCCTA	106.538	16.1795		33.5004	2.07055	7.5632	0.467456	6.8405	0.422788		14.4579		6.7598	0.467551	10.1961	0.705227	11.0409	0.763659
osa-miR156l-5p	21	CGACAGAAGAGAGTGAGCATA	162.504	25.4558		75.9343	2.98299	8.4276	0.331068	10.3278	0.405715		7.4415		8.4121	1.13043	8.9216	1.1989	17.5837	2.36292
osa-miR2905	21	TACATGTCAGTGACAAAGGCA	174.5	36.6736		19.0695	0.519979	7.5632	0.20623	14.0834	0.38402		30.1914		13.0689	0.432868	17.0466	0.564618	36.803	1.21899
osa-miR5804	21	TGCGAAGTAGAGATGCCGACT	139.821	26.103		14.9463	0.572589	12.3172	0.471869	14.3516	0.549807		13.6074		21.6312	1.58966	21.1888	1.55715	15.6754	1.15198
osa-miR812r	24	ACGTTAGACACGAATTTCTACGGC	141.714	30.2018		19.5849	0.648468	7.9954	0.264733	13.5469	0.448546		18.9228		10.5152	0.555689	17.3653	0.917692	23.5812	1.24618
osa-miR439e	21	TGTCGAACCGCGGTTGTTCGA	227.639	3.6674		1.2026	0.327916	1.0805	0.294623	2.6825	0.731445		47.2006		69.4002	1.47032	58.787	1.24547	43.6184	0.924107
osa-miR439b	21	TGTCGAACCGCGGTTGTTCGA	227.639	3.6674		1.2026	0.327916	1.0805	0.294623	2.6825	0.731445		47.2006		69.4002	1.47032	58.787	1.24547	43.6184	0.924107
osa-miR439h	21	TGTCGAACCGCGGTTGTTCGA	227.639	3.6674		1.2026	0.327916	1.0805	0.294623	2.6825	0.731445		47.2006		69.4002	1.47032	58.787	1.24547	43.6184	0.924107
osa-miR439c	21	TGTCGAACCGCGGTTGTTCGA	227.639	3.6674		1.2026	0.327916	1.0805	0.294623	2.6825	0.731445		47.2006		69.4002	1.47032	58.787	1.24547	43.6184	0.924107
osa-miR439g	21	TGTCGAACCGCGGTTGTTCGA	227.639	3.6674		1.2026	0.327916	1.0805	0.294623	2.6825	0.731445		47.2006		69.4002	1.47032	58.787	1.24547	43.6184	0.924107
osa-miR439a	21	TGTCGAACCGCGGTTGTTCGA	227.639	3.6674		1.2026	0.327916	1.0805	0.294623	2.6825	0.731445		47.2006		69.4002	1.47032	58.787	1.24547	43.6184	0.924107
osa-miR439f	21	TGTCGAACCGCGGTTGTTCGA	227.639	3.6674		1.2026	0.327916	1.0805	0.294623	2.6825	0.731445		47.2006		69.4002	1.47032	58.787	1.24547	43.6184	0.924107
osa-miR439d	21	TGTCGAACCGCGGTTGTTCGA	217.569	2.5887		0.6872	0.265461	1.0805	0.417391	2.4143	0.93263		45.9249		68.1985	1.485	55.9193	1.21762	40.7559	0.887447
osa-miR440	24	AGTGTCTCCTGATGATCGGGACAA	108.609	19.8469		11.6822	0.588616	5.8345	0.293975	6.8405	0.344663		14.8831		13.6697	0.918471	14.179	0.952691	21.6729	1.45621
miR9774-y	23	AGCAAGATATTGGGTATTTCTTT	149047	7992.9		8194.72	1.02525	3866.52	0.483744	6835.8	0.855235		29340.3		20394.3	0.695097	25117.5	0.856075	47304.9	1.61229
miR396-x	20	TCCACAGGCTTCTTGAACTG	6218.28	1064.83		1032.67	0.969802	439.962	0.413176	620.742	0.58295		843.871		585.696	0.694058	853.287	1.01116	777.225	0.921023
miR812-y	24	GAACGGTCAAACGTTGGACACGGA	3437.03	589.366		756.079	1.28287	213.714	0.362617	303.396	0.514784		448.831		261.678	0.583021	354.315	0.789417	509.653	1.13551
miR5072-x	20	TCTCCCCAGCGGAGTCGCCA	3619.05	575.344		582.392	1.01225	244.183	0.424412	221.042	0.384191		587.244		350.456	0.596781	569.867	0.97041	488.526	0.831896
miR166-y	21	TCGGATTAGGCTTCATTCCCC	1195.46	166.325		558.34	3.35692	36.3033	0.218267	59.6867	0.358855		99.2914		61.7392	0.621798	87.1449	0.877668	126.63	1.27533
miR8175-y	19	ATCCCCGGCAACGGCGCCA	1527.65	272.032		266.285	0.978877	129.006	0.474233	115.484	0.424523		271.723		126.332	0.464932	177.635	0.653738	169.157	0.622537
miR9773-y	26	TTTTTTTTTATGTTATTTTGTGAAGG	2026.53	284.328		369.192	1.29847	64.6113	0.227242	175.975	0.618916		280.44		202.943	0.72366	282.783	1.00836	366.258	1.30601
miR6225-x	21	AGACTCAAAAGATTCGTCTCG	981.658	249.812		213.2	0.853443	52.9423	0.211929	68.6732	0.2749		103.544		73.3059	0.707971	87.1449	0.841624	133.036	1.28483
miR167-x	20	TGAAGCTGCCAGCATGATGA	948.391	215.08		197.395	0.917775	79.5215	0.36973	94.9622	0.441521		93.7634		71.2028	0.759388	101.324	1.08063	95.1426	1.01471
miR168-y	21	CTTGCCTTGCACCAAGTGAAT	228.273	25.8872		103.765	4.00837	12.7494	0.492498	12.608	0.487036		17.8597		7.5108	0.420545	14.4976	0.811749	33.3953	1.86987
miR5794-y	23	TGAGGAATCACTAGTAGTCGTTT	384.678	98.5872		74.2163	0.752799	22.6896	0.230148	36.4827	0.370055		38.696		27.3395	0.70652	36.6423	0.946927	50.0248	1.29276
miR165-y	18	TCGGACCAGGCTTCACCC	245.61	40.9881		109.091	2.66153	5.8345	0.142346	15.1564	0.369776		18.9228		14.4208	0.762086	17.2059	0.909268	23.9901	1.26779
miR5160-y	24	GCGAGATCGACGTTATATTTCTGC	368.31	97.0771		192.928	1.98737	26.3631	0.271569	47.4811	0.489107		0.4252		1.352	3.17968	1.5931	3.74671	1.0905	2.56468
miR6478-x	20	CCGACCTTAGCTCAGTTGGA	279.894	79.3875		19.4131	0.244536	5.4023	0.0680498	12.2056	0.153747		27.64		18.1762	0.657605	32.3408	1.17007	85.3284	3.08713
miR435-y	22	TTATCCGGTATTGGAGTTGATT	196.442	40.5567		24.567	0.605745	20.0965	0.495516	30.1787	0.744111		15.0957		18.7771	1.24387	17.0466	1.12924	30.1239	1.99553
miR5799-x	21	ATAAGACGAATAGTCAAACGA	198.251	37.105		24.3952	0.657464	17.7195	0.47755	17.0342	0.459081		27.8526		22.3823	0.803598	18.6398	0.66923	33.1227	1.18921
miR5809-y	21	CTCGTCGCCGGCGACCACAGC	173.781	44.8712		23.8798	0.532185	14.4781	0.322659	15.9612	0.355711		23.8129		14.8715	0.624514	19.277	0.809519	16.6295	0.69834
miR156-x	22	CTTGACAGAAGAGAGTGAGCAC	111.091	7.5504		32.4696	4.30038	3.4575	0.457923	3.4873	0.46187		9.9929		4.9572	0.496072	8.2843	0.829019	40.8922	4.09213
novel-m0502-3p	20	CGGCGATGAGGAAGAACATG	561.362	102.47		101.876	0.994196	37.8159	0.369043	46.1398	0.450275		65.273		53.7777	0.823889	52.733	0.807884	101.276	1.55158
novel-m0378-5p	22	AGGCTATTAAGTAACTCTAAAT	189.345	31.0647		49.6493	1.59825	6.4827	0.208684	10.4619	0.336778		19.1354		15.4723	0.808569	18.6398	0.9741	38.4387	2.00877
novel-m0644-3p	21	TTTCGTTCTCTCCCTTTAACA	214.053	49.4015		125.068	2.53167	8.8597	0.179341	19.8509	0.401828		2.5514		2.2533	0.883162	1.4338	0.561966	4.6345	1.81645
novel-m0239-5p	21	AATTTGTCCAGCTTACAGTCT	173.507	27.8288		47.9314	1.72237	8.6436	0.310599	15.5588	0.55909		24.4508		13.3693	0.546784	18.9584	0.775369	16.7658	0.685695
novel-m0278-5p	21	AATTTGTCCAGCTTACAGTCT	173.507	27.8288		47.9314	1.72237	8.6436	0.310599	15.5588	0.55909		24.4508		13.3693	0.546784	18.9584	0.775369	16.7658	0.685695
novel-m0325-3p	21	TTATGAACTAGAAATGCTTAG	139.138	29.986		40.8877	1.36356	6.2666	0.208984	5.9016	0.196812		14.8831		11.1161	0.746894	10.1961	0.685079	19.9009	1.33715
novel-m0318-3p	22	TTAATTCATTGATTGTTTTCAG	214.245	25.0243		14.9463	0.597271	5.1862	0.207247	20.7898	0.830784		35.0816		41.0092	1.16897	30.907	0.881003	41.3011	1.17729
									in total:166
											zy22h≤0.5
osa-miR396f-5p	22	TCTCCACAGGCTTTCTTGAACT	967501	174383		203573	1.16739	58337.5	0.334537	76257.9	0.437302		132856		84319.8	0.634669	122621	0.922957	115153	0.866751
osa-miR396e-5p	21	TCCACAGGCTTTCTTGAACTG	966645	174228		203379	1.16731	58304.6	0.334645	76190.5	0.437303		132751		84229.5	0.634491	122512	0.922866	115050	0.86666
osa-miR167f	21	TGAAGCTGCCAGCATGATCTG	461000	111325		102064	0.916811	37715.7	0.338789	42474	0.381532		46234.7		32265.5	0.697864	46336.4	1.0022	42585.2	0.921064
osa-miR167j	21	TGAAGCTGCCAGCATGATCTG	460855	111319		102061	0.916832	37698.4	0.338651	42451.2	0.381346		46213.9		32238.1	0.697584	46309.3	1.00206	42563.5	0.921011
osa-miR167d-5p	21	TGAAGCTGCCAGCATGATCTG	460855	111319		102061	0.916832	37698.4	0.338651	42451.2	0.381346		46213.9		32238.1	0.697584	46309.3	1.00206	42563.5	0.921011
osa-miR167h-5p	21	TGAAGCTGCCAGCATGATCTG	460778	111304		102042	0.916792	37691.5	0.338637	42445.8	0.381352		46205.6		32233.5	0.697611	46300.9	1.00206	42554.8	0.920987
osa-miR167g	21	TGAAGCTGCCAGCATGATCTG	460683	111283		102039	0.916931	37679.2	0.338588	42432.3	0.381299		46191.6		32222.1	0.697576	46286.7	1.00206	42549	0.921143
osa-miR166c-3p	21	TCGGACCAGGCTTCATTCCCC	77596.2	12002.6		31949.3	2.66186	2247.13	0.18722	4012.42	0.334296		7576.34		4679.86	0.617694	7086.46	0.935341	8042.14	1.06148
osa-miR166j-3p	21	TCGGACCAGGCTTCATTCCCC	77547.4	11989.5		31930.5	2.66322	2245.4	0.187282	4011.48	0.334584		7572.51		4677.3	0.617669	7082	0.935224	8038.73	1.06157
osa-miR166a-3p	21	TCGGACCAGGCTTCATTCCCC	76277	11453.8		32199.6	2.81126	2190.52	0.191248	3918.26	0.342093		7222.12		4505.16	0.623799	6806.86	0.942502	7980.66	1.10503
osa-miR166d-3p	21	TCGGACCAGGCTTCATTCCCC	76277	11453.8		32199.6	2.81126	2190.52	0.191248	3918.26	0.342093		7222.12		4505.16	0.623799	6806.86	0.942502	7980.66	1.10503
osa-miR166f	21	TCGGACCAGGCTTCATTCCCC	76277	11453.8		32199.6	2.81126	2190.52	0.191248	3918.26	0.342093		7222.12		4505.16	0.623799	6806.86	0.942502	7980.66	1.10503
osa-miR166b-3p	21	TCGGACCAGGCTTCATTCCCC	76226.1	11447.8		32178.6	2.81091	2190.52	0.191349	3916.39	0.342109		7213.19		4503.5	0.624342	6804.15	0.943293	7971.94	1.10519
osa-miR156d	20	TGACAGAAGAGAGTGAGCAC	62282.2	5338.81		26221	4.9114	2306.56	0.432036	2580.88	0.483419		6957.42		3505.91	0.50391	4649.11	0.668224	10722.5	1.54116
osa-miR156f-5p	20	TGACAGAAGAGAGTGAGCAC	62157.4	5330.61		26164	4.90826	2303.32	0.432092	2574.84	0.48303		6942.96		3499.3	0.504007	4640.51	0.668376	10701.9	1.5414
osa-miR156j-5p	20	TGACAGAAGAGAGTGAGCAC	62157.4	5330.61		26164	4.90826	2303.32	0.432092	2574.84	0.48303		6942.96		3499.3	0.504007	4640.51	0.668376	10701.9	1.5414
osa-miR156h-5p	20	TGACAGAAGAGAGTGAGCAC	62157.4	5330.61		26164	4.90826	2303.32	0.432092	2574.84	0.48303		6942.96		3499.3	0.504007	4640.51	0.668376	10701.9	1.5414
osa-miR168a-3p	24	GATCCCGCCTTGCACCAAGTGAAT	42013.4	5151.56		19841.9	3.85163	2183.17	0.423788	2269.57	0.44056		3325.94		1911.51	0.574727	2769.84	0.832798	4559.89	1.37101
osa-miR396c-5p	21	TTCCACAGCTTTCTTGAACTT	68296.7	11719.8		21485.6	1.83328	3094.21	0.264016	4396.43	0.375128		7604.19		4887.16	0.642692	6603.74	0.868434	8505.58	1.11854
osa-miR169c	21	CAGCCAAGGATGACTTGCCGG	37265.5	14273.4		7923.62	0.555134	2551.6	0.178767	4295.97	0.300978		2482.29		1521.25	0.612841	2156.16	0.868619	2061.24	0.83038
osa-miR169b	21	CAGCCAAGGATGACTTGCCGG	35512.2	13631.6		7759.39	0.569222	2298.78	0.168636	3992.17	0.292862		2393.84		1416.7	0.591809	2007.2	0.838486	2012.58	0.840733
osa-miR5794	21	TGAGGAATCACTAGTAGTCGT	21651.2	4052.86		9915.61	2.44657	1336.74	0.329826	1435.83	0.354277		1201.7		841.816	0.700519	1062.63	0.884267	1804.03	1.50123
osa-miR5788	21	TGGATGTGACATACTCTAGTA	44000.4	7841.46		7915.55	1.00945	3942.37	0.50276	3136.03	0.39993		5571.8		4906.08	0.88052	5727.99	1.02803	4959.14	0.890042
osa-miR156b-5p	20	TGACAGAAGAGAGTGAGCAC	23437.5	2121.67		10174.7	4.79559	935.458	0.440906	1025.81	0.483489		2392.56		1274.14	0.532542	1797.86	0.751438	3715.33	1.55287
osa-miR156c-5p	20	TGACAGAAGAGAGTGAGCAC	23436.3	2121.67		10173.5	4.79502	935.458	0.440906	1025.81	0.483489		2392.56		1274.14	0.532542	1797.86	0.751438	3715.33	1.55287
osa-miR156g-5p	20	TGACAGAAGAGAGTGAGCAC	23436.3	2121.67		10173.5	4.79502	935.458	0.440906	1025.81	0.483489		2392.56		1274.14	0.532542	1797.86	0.751438	3715.33	1.55287
osa-miR156a	20	TGACAGAAGAGAGTGAGCAC	23317.7	2109.16		10128.5	4.80213	931.785	0.44178	1021.25	0.484195		2377.68		1265.58	0.532274	1789.42	0.75259	3694.34	1.55376
osa-miR156i	20	TGACAGAAGAGAGTGAGCAC	23317.7	2109.16		10128.5	4.80213	931.785	0.44178	1021.25	0.484195		2377.68		1265.58	0.532274	1789.42	0.75259	3694.34	1.55376
osa-miR156e	20	TGACAGAAGAGAGTGAGCAC	23317.7	2109.16		10128.5	4.80213	931.785	0.44178	1021.25	0.484195		2377.68		1265.58	0.532274	1789.42	0.75259	3694.34	1.55376
osa-miR167b	21	TGAAGCTGCCAGCATGATCTA	21268	3392.52		3664.09	1.08005	1491.46	0.439632	1348.11	0.397378		2796.53		2401.37	0.858695	3012.31	1.07716	3161.65	1.13056
osa-miR167c-5p	21	TGAAGCTGCCAGCATGATCTA	21087	3343.77		3623.2	1.08357	1474.39	0.440937	1331.35	0.398158		2781.65		2390.85	0.859509	2997.02	1.07743	3144.75	1.13053
osa-miR167a-5p	21	TGAAGCTGCCAGCATGATCTA	21087	3343.77		3623.2	1.08357	1474.39	0.440937	1331.35	0.398158		2781.65		2390.85	0.859509	2997.02	1.07743	3144.75	1.13053
osa-miR166l-3p	21	TCGGACCAGGCTTCAATCCCT	12689.8	2057.17		5601.1	2.72272	539.796	0.262397	668.357	0.324891		1006.95		590.653	0.586578	1077.92	1.07048	1147.84	1.13993
osa-miR166k-3p	21	TCGGACCAGGCTTCAATCCCT	12560.4	2032.58		5554.89	2.73293	536.338	0.263871	661.114	0.325259		996.104		582.391	0.584669	1063.9	1.06806	1133.12	1.13756
osa-miR166g-3p	21	TCGGACCAGGCTTCATTCCTC	13633.8	1821.6		5536.85	3.03956	450.334	0.247219	692.902	0.380382		1357.12		871.709	0.64232	1222.74	0.900976	1680.53	1.2383
osa-miR156h-3p	22	GCTCACTTCTCTTTCTGTCAGC	10626.2	1060.08		1243.64	1.17315	312.468	0.294758	443.693	0.418546		2530.97		1538.82	0.607996	1810.93	0.715505	1685.58	0.66598
osa-miR156f-3p	22	GCTCACTTCTCTTTCTGTCAGC	10626.2	1060.08		1243.64	1.17315	312.468	0.294758	443.693	0.418546		2530.97		1538.82	0.607996	1810.93	0.715505	1685.58	0.66598
osa-miR156l-3p	22	GCTCACTTCTCTTTCTGTCAGC	10355.3	1029.66		1178.87	1.14491	309.226	0.300318	437.121	0.424528		2451.24		1497.81	0.611042	1782.41	0.727144	1668.95	0.680858
osa-miR156g-3p	22	GCTCACTTCTCTCTCTGTCAGC	9363.56	1681.81		2479.55	1.47434	631.418	0.37544	810.666	0.482021		1026.3		770.012	0.750283	985.678	0.960423	978.142	0.953081
osa-miR156c-3p	22	GCTCACTTCTCTCTCTGTCAGC	9357.35	1681.38		2477.66	1.47359	631.418	0.375537	810.398	0.481985		1025.66		768.96	0.749725	984.562	0.959933	977.324	0.952876
osa-miR162a	21	TCGATAAACCTCTGCATCCAG	6614.01	884.696		2742.57	3.10001	187.567	0.212013	341.086	0.38554		541.319		395.371	0.730384	414.854	0.766377	1106.54	2.04416
osa-miR166h-3p	21	TCGGACCAGGCTTCATTCCTC	6682.4	964.731		2421.99	2.51054	239.429	0.248182	329.819	0.341877		764.991		453.204	0.592431	669.12	0.874677	839.109	1.09689
osa-miR1432-5p	21	ATCAGGAGAGATGACACCGAC	1716.67	178.622		532.055	2.97867	40.193	0.225017	71.7582	0.401732		184.763		172.75	0.934979	139.878	0.757067	396.655	2.14683
osa-miR1863a	24	AGCTCTGATACCATGTTAGATTAG	5368.15	1044.77		788.377	0.754597	182.597	0.174773	479.64	0.459088		899.576		410.843	0.456708	699.39	0.777466	862.962	0.959299
osa-miR166m	21	TCGGACCAGGCTTCATTCCCT	2880.49	463.813		1143.65	2.46576	102.859	0.221769	165.379	0.356564		270.872		188.522	0.695982	276.729	1.02162	268.662	0.99184
osa-miR395d	21	GTGAAGTGTTTGGGGGAACTC	1336.68	273.542		410.423	1.5004	84.4916	0.30888	108.375	0.396192		103.756		108.006	1.04096	117.096	1.12857	130.991	1.26249
osa-miR395y	21	GTGAAGTGTTTGGGGGAACTC	1336.41	273.542		410.423	1.5004	84.4916	0.30888	108.107	0.395211		103.756		108.006	1.04096	117.096	1.12857	130.991	1.26249
osa-miR395s	21	GTGAAGTGTTTGGGGGAACTC	1336.41	273.542		410.423	1.5004	84.4916	0.30888	108.107	0.395211		103.756		108.006	1.04096	117.096	1.12857	130.991	1.26249
osa-miR395g	21	GTGAAGTGTTTGGGGGAACTC	1336.41	273.542		410.423	1.5004	84.4916	0.30888	108.107	0.395211		103.756		108.006	1.04096	117.096	1.12857	130.991	1.26249
osa-miR395e	21	GTGAAGTGTTTGGGGGAACTC	1336.41	273.542		410.423	1.5004	84.4916	0.30888	108.107	0.395211		103.756		108.006	1.04096	117.096	1.12857	130.991	1.26249
osa-miR395k	21	GTGAAGTGTTTGGGGGAACTC	1336.39	273.973		410.423	1.49804	84.4916	0.308394	108.375	0.395568		103.756		108.006	1.04096	116.777	1.1255	130.583	1.25855
osa-miR395i	21	GTGAAGTGTTTGGGGGAACTC	1336.39	273.973		410.423	1.49804	84.4916	0.308394	108.375	0.395568		103.756		108.006	1.04096	116.777	1.1255	130.583	1.25855
osa-miR395j	21	GTGAAGTGTTTGGGGGAACTC	1335.69	273.542		410.423	1.5004	84.4916	0.30888	108.107	0.395211		103.756		108.006	1.04096	116.777	1.1255	130.583	1.25855
osa-miR395b	21	GTGAAGTGTTTGGGGGAACTC	1335.33	273.973		409.908	1.49616	84.4916	0.308394	107.838	0.393609		103.756		108.006	1.04096	116.777	1.1255	130.583	1.25855
osa-miR395h	21	GTGAAGTGTTTGGGGGAACTC	1334.9	273.542		409.908	1.49852	84.4916	0.30888	107.838	0.39423		103.756		108.006	1.04096	116.777	1.1255	130.583	1.25855
osa-miR395r	21	GTGAAGTGTTTGGGGGAACTC	1279.45	253.479		388.261	1.53173	80.1698	0.316278	101.937	0.402151		102.481		107.105	1.04512	115.981	1.13173	130.037	1.2689
osa-miR395q	21	GTGAAGTGTTTGGGGGAACTC	1279.45	253.479		388.261	1.53173	80.1698	0.316278	101.937	0.402151		102.481		107.105	1.04512	115.981	1.13173	130.037	1.2689
osa-miR395n	21	GTGAAGTGTTTGGGGGAACTC	1279.18	253.479		388.261	1.53173	80.1698	0.316278	101.669	0.401093		102.481		107.105	1.04512	115.981	1.13173	130.037	1.2689
osa-miR395l	21	GTGAAGTGTTTGGGGGAACTC	1279.18	253.479		388.261	1.53173	80.1698	0.316278	101.669	0.401093		102.481		107.105	1.04512	115.981	1.13173	130.037	1.2689
osa-miR395p	21	GTGAAGTGTTTGGGGGAACTC	1279.18	253.479		388.261	1.53173	80.1698	0.316278	101.669	0.401093		102.481		107.105	1.04512	115.981	1.13173	130.037	1.2689
osa-miR395m	21	GTGAAGTGTTTGGGGGAACTC	1278.4	253.479		387.746	1.5297	80.1698	0.316278	101.4	0.400034		102.481		107.105	1.04512	115.981	1.13173	130.037	1.2689
osa-miR169e	21	TAGCCAAGGATGACTTGCCGG	1854.47	636.826		230.723	0.362302	249.153	0.391242	290.788	0.456621		102.481		109.358	1.06711	157.721	1.53903	77.4226	0.755485
osa-miR396f-3p	24	ATAGTTCAAGAAAGTCCTTGGAAA	2531.19	431.454		514.532	1.19255	183.894	0.426219	188.449	0.436777		389.937		228.029	0.584785	330.736	0.84818	264.164	0.677453
osa-miR535-5p	21	TGACAACGAGAGAGAGCACGC	1723.83	182.073		911.899	5.00841	28.3079	0.155475	55.5288	0.30498		112.261		98.2419	0.87512	87.3042	0.777689	248.216	2.21106
osa-miR810b.2	21	AAGTGATTTAATTATGCCGTT	1632.7	344.947		460.244	1.33425	57.2642	0.166009	88.9265	0.257797		201.134		139.702	0.694569	128.248	0.637624	212.231	1.05517
osa-miR810b.1	21	TGAACACCGATATGCGTCATC	1122.26	189.624		363.866	1.91888	55.3193	0.291732	50.566	0.266665		139.688		69.8509	0.500048	82.6841	0.591918	170.657	1.2217
osa-miR156b-3p	21	GCTCACTCTCTATCTGTCAGC	2426.79	554.202		955.707	1.72447	240.293	0.433584	249.343	0.449913		111.836		90.8812	0.812631	128.567	1.1496	95.9604	0.858047
osa-miR5072	22	CGATTCCCCAGCGGAGTCGCCA	1957.48	339.123		123.522	0.36424	262.983	0.77548	119.373	0.352007		300.213		276.249	0.920176	355.271	1.1834	180.744	0.602051
osa-miR5339	21	CAGATAGAGAATCTTCTCAGA	1546.68	338.044		194.131	0.574276	55.7515	0.164924	104.888	0.310278		224.735		137.899	0.613609	191.496	0.852098	299.74	1.33375
osa-miR5150-3p	24	AGAAGCTGCAGCTGTCAGAAGCTC	1444.96	287.78		319.027	1.10858	96.8088	0.336399	115.35	0.400826		188.377		108.457	0.575741	148.959	0.790748	180.198	0.956582
osa-miR156j-3p	22	GCTCGCTCCTCTTTCTGTCAGC	1160.75	206.666		565.384	2.73573	79.0894	0.382691	99.6567	0.482211		61.8711		42.0607	0.679812	50.8213	0.821406	55.2045	0.89225
osa-miR167h-3p	21	AGGTCATGCTGTAGTTTCATC	454.844	37.105		212.341	5.72271	12.9655	0.349427	9.9254	0.267495		72.5019		39.6573	0.546983	32.1815	0.443871	38.1661	0.526415
osa-miR2878-3p	24	CAGGATTTTATACATGTAAAGAAT	760.158	166.325		183.136	1.10107	28.0918	0.168897	47.4811	0.285471		114.6		54.9794	0.479751	75.037	0.654774	90.5081	0.789775
osa-miR535-3p	21	GTGCTTTCTCCCGTTGTCACT	674.587	130.946		262.506	2.00469	30.0367	0.229382	28.5691	0.218174		68.8874		54.5287	0.791563	47.3163	0.686864	51.7968	0.751905
osa-miR166j-5p	21	GAATGACGTCCGGTCTGAAGA	991.239	271.6		171.625	0.631904	46.8918	0.17265	39.7017	0.146177		211.978		82.9197	0.391172	75.1963	0.354737	91.326	0.430828
osa-miR1425-3p	21	CAGCAAGAACTGGATCTTAAT	486.527	58.8934		155.304	2.63704	26.5792	0.45131	18.1072	0.307457		50.8151		39.9577	0.786335	47.3163	0.931146	89.554	1.76235
osa-miR166i-3p	21	TCGGATCAGGCTTCATTCCTC	585.28	83.9178		201.174	2.39728	18.1517	0.216303	26.9596	0.321262		68.2496		49.5716	0.726328	59.4242	0.870689	77.8315	1.14039
osa-miR1878	24	ACTTAATCTGGACACTATAAAAGA	563.685	63.208		278.998	4.41397	14.9103	0.235893	23.7406	0.375595		45.0745		28.391	0.629868	23.8971	0.530169	85.4647	1.89608
osa-miR166i-5p	21	AATGCAGTTTGATCCAAGATC	447.072	49.4015		90.1934	1.82572	11.6689	0.236205	24.4112	0.494139		68.2496		49.7218	0.728529	56.2379	0.824003	97.1872	1.424
osa-miR1857-3p	21	TCATGCTCCAAGAAAACCAGG	333.828	56.9519		137.781	2.41926	9.2919	0.163153	13.5469	0.237866		29.3409		22.0819	0.752598	23.2599	0.792747	41.5738	1.41692
osa-miR169o	21	TAGCCAAGAATGACTTGCCTA	192.756	31.2804		25.9414	0.829318	12.3172	0.393767	13.681	0.437367		34.8689		18.026	0.516965	27.88	0.799566	28.7609	0.82483
osa-miR169n	21	TAGCCAAGAATGACTTGCCTA	193.024	31.2804		25.9414	0.829318	12.3172	0.393767	13.9493	0.445944		34.8689		18.026	0.516965	27.88	0.799566	28.7609	0.82483
osa-miR1849	21	TATCGTATCCTAGGTTGGTTT	314.917	61.6979		102.219	1.65677	20.0965	0.325724	25.8866	0.41957		30.8292		21.0304	0.682158	23.5785	0.764811	29.5787	0.959438
osa-miR1860-3p	22	ATCTGGAAGCTAGGTTTTCTCT	268.639	62.9922		75.4189	1.19727	14.6942	0.23327	19.8509	0.315133		28.4905		15.3221	0.537797	15.6128	0.548	36.2578	1.27263
osa-miR167e-3p	21	AGATCATGTTGCAGCTTCACT	197.387	14.238		101.189	7.10693	5.8345	0.409784	4.8286	0.339135		24.4508		9.7641	0.399337	16.0907	0.658085	20.9913	0.858512
osa-miR167i-3p	21	AGATCATGTTGCAGCTTCACT	197.387	14.238		101.189	7.10693	5.8345	0.409784	4.8286	0.339135		24.4508		9.7641	0.399337	16.0907	0.658085	20.9913	0.858512
osa-miR396e-3p	24	ATGGTTCAAGAAAGCCCATGGAAA	190.317	20.0626		75.0753	3.74205	9.7241	0.484688	6.1699	0.307532		26.7896		12.6182	0.471011	16.5687	0.618475	23.3086	0.870062
osa-miR1870-3p	24	TTTAGGGCTAATTCAGCATGAACA	290.679	70.7584		100.845	1.4252	10.8046	0.152697	14.4858	0.204722		25.3012		15.923	0.629338	20.3922	0.805978	32.1686	1.27143
osa-miR1873	24	TCAACATGGTATCAGAGCTGGAAG	196.412	18.1211		103.937	5.7357	6.2666	0.345818	4.5603	0.251657		13.6074		15.3221	1.12601	11.152	0.819554	23.4449	1.72295
osa-miR1437a	22	TCCGGCGCCGCACTAGGCACTG	226.444	47.4599		40.7159	0.857901	15.7747	0.33238	17.7048	0.373048		31.4671		18.9273	0.601495	17.0466	0.541728	37.3482	1.1869
osa-miR1863c	24	TAGAAACTTGGCTGATGCATTACT	188.477	26.9659		85.5549	3.17271	6.0506	0.22438	6.9746	0.258645		18.9228		10.0645	0.531872	14.179	0.749308	19.7646	1.04449
osa-miR2864.1	21	TTTTGCTGCCCTTGTTTTGCA	122.086	20.4941		46.3852	2.26334	5.6184	0.274147	8.45	0.412314		11.2686		6.6095	0.586541	10.9927	0.975516	12.2677	1.08866
osa-miR5542	21	TTTGAGAAGGTATCATGAGAT	195.511	47.0285		106.171	2.25758	22.6896	0.482465	19.5826	0.416399		0.01		0.01	1	0.01	1	0.01	1
osa-miR2871a-5p	24	GACCGTAGAAACTAGCATAGAAAA	127.621	18.5525		58.411	3.14842	9.7241	0.52414	3.6214	0.195197		9.1425		6.0087	0.657227	6.2133	0.679606	15.948	1.74438
osa-miR390-5p	21	AAGCTCAGGAGGGATAGCGCC	176.93	23.73		70.4368	2.96826	6.9149	0.291399	9.6572	0.406962		16.1588		13.0689	0.808779	13.3824	0.82818	23.5812	1.45934
osa-miR1423-3p	21	AGCGCCCAAGCGGTAGTTGTC	181.071	34.3006		47.5878	1.38738	3.8896	0.113397	10.8643	0.316738		22.5372		12.0174	0.533225	16.8873	0.749308	32.9864	1.46364
osa-miR1856	21	TATGCGTAAGACGGATTCGTA	106.288	16.8267		28.8619	1.71524	3.8896	0.231156	4.9627	0.29493		12.5443		11.7169	0.934042	10.9927	0.87631	16.4932	1.3148
osa-miR5513	21	TAACAAAGGACAACAGACTGA	120.084	26.103		38.3107	1.46767	4.754	0.182125	5.6334	0.215814		11.4812		5.4078	0.471013	10.6741	0.929702	17.72	1.54339
osa-miR1863b.2	23	AGAGACTTGGCTGATGCATTACT	172.639	36.0264		73.3573	2.03621	7.9954	0.221932	11.6691	0.323904		11.4812		9.1632	0.798105	13.5417	1.17947	9.4052	0.819183
osa-miR2874	24	ATGTGAACAGTGTCAAACAGTGTC	210.423	43.7926		28.1747	0.643367	12.3172	0.281262	21.058	0.480857		27.2148		21.0304	0.772756	22.6226	0.831261	34.2132	1.25715
osa-miR7694-5p	24	AACCTAGTACTGGATTAGTCACCA	131.894	22.6513		50.6801	2.2374	5.6184	0.248039	5.6334	0.248701		12.9695		7.8113	0.602282	10.0368	0.773877	16.4932	1.27169
osa-miR1846d-5p	22	TCCCACCGAGCAGCCGGATCTC	100.679	14.8852		38.1389	2.5622	3.2414	0.21776	5.231	0.351423		11.6939		6.0087	0.513832	6.2133	0.531328	15.2664	1.3055
osa-miR2118o	22	CTCCTGATGCCTCCCAAGCCTA	106.538	16.1795		33.5004	2.07055	7.5632	0.467456	6.8405	0.422788		14.4579		6.7598	0.467551	10.1961	0.705227	11.0409	0.763659
osa-miR156l-5p	21	CGACAGAAGAGAGTGAGCATA	162.504	25.4558		75.9343	2.98299	8.4276	0.331068	10.3278	0.405715		7.4415		8.4121	1.13043	8.9216	1.1989	17.5837	2.36292
osa-miR2905	21	TACATGTCAGTGACAAAGGCA	174.5	36.6736		19.0695	0.519979	7.5632	0.20623	14.0834	0.38402		30.1914		13.0689	0.432868	17.0466	0.564618	36.803	1.21899
osa-miR166a-5p	21	GGAATGTTGTCTGGTTCAAGG	142.569	20.4941		47.9314	2.33879	11.885	0.579923	6.1699	0.301057		18.7102		17.7256	0.947376	13.3824	0.715246	6.2701	0.335117
osa-miR166e-5p	21	GGAATGTTGTCTGGTTCAAGG	137.443	20.0626		46.2134	2.30346	11.885	0.592396	5.6334	0.280791		17.4345		17.4252	0.999467	13.0638	0.749307	5.7249	0.328366
osa-miR812r	24	ACGTTAGACACGAATTTCTACGGC	141.714	30.2018		19.5849	0.648468	7.9954	0.264733	13.5469	0.448546		18.9228		10.5152	0.555689	17.3653	0.917692	23.5812	1.24618
osa-miR440	24	AGTGTCTCCTGATGATCGGGACAA	108.609	19.8469		11.6822	0.588616	5.8345	0.293975	6.8405	0.344663		14.8831		13.6697	0.918471	14.179	0.952691	21.6729	1.45621
miR5139-x	18	AACCTGGCTCTGATACCA	2090.09	348.183		793.874	2.28005	176.547	0.507051	79.1352	0.22728		234.94		100.645	0.428387	163.616	0.696415	193.148	0.822114
miR5072-x	20	TCTCCCCAGCGGAGTCGCCA	3619.05	575.344		582.392	1.01225	244.183	0.424412	221.042	0.384191		587.244		350.456	0.596781	569.867	0.97041	488.526	0.831896
miR8155-y	18	AACCTGGCTCTGATACCA	1822.51	311.725		699.558	2.24415	170.928	0.548329	65.3201	0.209544		197.095		91.1817	0.462629	138.125	0.700808	148.575	0.753826
miR894-x	19	TTTCACGTCGGGTTCACCA	1910.19	278.072		647.503	2.32855	157.963	0.568064	85.8415	0.308703		287.031		110.86	0.386231	170.626	0.59445	172.293	0.600258
miR1511-y	18	AACCTGGCTCTGATACCA	969.255	196.959		324.696	1.64855	121.875	0.618787	30.4469	0.154585		100.992		52.2755	0.517618	75.3557	0.746152	66.6543	0.659993
miR5054-y	19	TTCCCCACGGACGGCGCCA	2219.08	398.232		140.53	0.352885	388.532	0.975643	171.817	0.43145		339.972		325.971	0.958816	303.812	0.893639	150.211	0.441833
miR166-y	21	TCGGATTAGGCTTCATTCCCC	1195.46	166.325		558.34	3.35692	36.3033	0.218267	59.6867	0.358855		99.2914		61.7392	0.621798	87.1449	0.877668	126.63	1.27533
miR8175-y	19	ATCCCCGGCAACGGCGCCA	1527.65	272.032		266.285	0.978877	129.006	0.474233	115.484	0.424523		271.723		126.332	0.464932	177.635	0.653738	169.157	0.622537
miR6225-x	21	AGACTCAAAAGATTCGTCTCG	981.658	249.812		213.2	0.853443	52.9423	0.211929	68.6732	0.2749		103.544		73.3059	0.707971	87.1449	0.841624	133.036	1.28483
miR167-x	20	TGAAGCTGCCAGCATGATGA	948.391	215.08		197.395	0.917775	79.5215	0.36973	94.9622	0.441521		93.7634		71.2028	0.759388	101.324	1.08063	95.1426	1.01471
miR168-y	21	CTTGCCTTGCACCAAGTGAAT	228.273	25.8872		103.765	4.00837	12.7494	0.492498	12.608	0.487036		17.8597		7.5108	0.420545	14.4976	0.811749	33.3953	1.86987
miR5794-y	23	TGAGGAATCACTAGTAGTCGTTT	384.678	98.5872		74.2163	0.752799	22.6896	0.230148	36.4827	0.370055		38.696		27.3395	0.70652	36.6423	0.946927	50.0248	1.29276
miR165-y	18	TCGGACCAGGCTTCACCC	245.61	40.9881		109.091	2.66153	5.8345	0.142346	15.1564	0.369776		18.9228		14.4208	0.762086	17.2059	0.909268	23.9901	1.26779
miR5160-y	24	GCGAGATCGACGTTATATTTCTGC	368.31	97.0771		192.928	1.98737	26.3631	0.271569	47.4811	0.489107		0.4252		1.352	3.17968	1.5931	3.74671	1.0905	2.56468
miR6478-x	20	CCGACCTTAGCTCAGTTGGA	279.894	79.3875		19.4131	0.244536	5.4023	0.0680498	12.2056	0.153747		27.64		18.1762	0.657605	32.3408	1.17007	85.3284	3.08713
miR5799-x	21	ATAAGACGAATAGTCAAACGA	198.251	37.105		24.3952	0.657464	17.7195	0.47755	17.0342	0.459081		27.8526		22.3823	0.803598	18.6398	0.66923	33.1227	1.18921
miR5809-y	21	CTCGTCGCCGGCGACCACAGC	173.781	44.8712		23.8798	0.532185	14.4781	0.322659	15.9612	0.355711		23.8129		14.8715	0.624514	19.277	0.809519	16.6295	0.69834
miR156-x	22	CTTGACAGAAGAGAGTGAGCAC	111.091	7.5504		32.4696	4.30038	3.4575	0.457923	3.4873	0.46187		9.9929		4.9572	0.496072	8.2843	0.829019	40.8922	4.09213
miR2873-y	21	TTTGGACTTGAGATTTGGTGA	188.383	9.2763		5.6693	0.61116	9.7241	1.04827	2.8167	0.303645		42.9483		31.5456	0.734502	41.4217	0.964455	44.9814	1.04734
miR5788-x	22	TGGATGTGACATACTCTAGTTT	119.356	21.357		17.6951	0.828539	17.0712	0.799326	8.9865	0.420775		15.9462		12.468	0.781879	13.701	0.859202	12.1314	0.760771
novel-m0502-3p	20	CGGCGATGAGGAAGAACATG	561.362	102.47		101.876	0.994196	37.8159	0.369043	46.1398	0.450275		65.273		53.7777	0.823889	52.733	0.807884	101.276	1.55158
novel-m0248-5p	21	CCCGCCACCGGCGCCGCTTCC	445.824	115.198		40.8877	0.354933	76.9284	0.667792	24.2771	0.210742		57.8314		47.0179	0.813017	57.5125	0.994486	26.171	0.45254
novel-m0378-5p	22	AGGCTATTAAGTAACTCTAAAT	189.345	31.0647		49.6493	1.59825	6.4827	0.208684	10.4619	0.336778		19.1354		15.4723	0.808569	18.6398	0.9741	38.4387	2.00877
novel-m0644-3p	21	TTTCGTTCTCTCCCTTTAACA	214.053	49.4015		125.068	2.53167	8.8597	0.179341	19.8509	0.401828		2.5514		2.2533	0.883162	1.4338	0.561966	4.6345	1.81645
novel-m0325-3p	21	TTATGAACTAGAAATGCTTAG	139.138	29.986		40.8877	1.36356	6.2666	0.208984	5.9016	0.196812		14.8831		11.1161	0.746894	10.1961	0.685079	19.9009	1.33715
											in total:134
																jn3h≤0.5
osa-miR827	21	TTAGATGACCATCAGCAAACA	30042.4	3617.96		4715.14	1.30326	1718.36	0.474952	2854.1	0.78887		6237.71		2642.17	0.423579	3564.02	0.571366	4692.93	0.752347
osa-miR1863a	24	AGCTCTGATACCATGTTAGATTAG	5368.15	1044.77		788.377	0.754597	182.597	0.174773	479.64	0.459088		899.576		410.843	0.456708	699.39	0.777466	862.962	0.959299
osa-miR2878-3p	24	CAGGATTTTATACATGTAAAGAAT	760.158	166.325		183.136	1.10107	28.0918	0.168897	47.4811	0.285471		114.6		54.9794	0.479751	75.037	0.654774	90.5081	0.789775
osa-miR166j-5p	21	GAATGACGTCCGGTCTGAAGA	991.239	271.6		171.625	0.631904	46.8918	0.17265	39.7017	0.146177		211.978		82.9197	0.391172	75.1963	0.354737	91.326	0.430828
osa-miR1882b	24	AGATTGCTTTCAAGGTCATTTCTT	283.528	0.01		0.01	1	0.01	1	0.01	1		90.9994		40.2581	0.4424	61.1767	0.672276	91.0534	1.00059
osa-miR1882f	24	AGATTGCTTTCAAGGTCATTTCTT	283.528	0.01		0.01	1	0.01	1	0.01	1		90.9994		40.2581	0.4424	61.1767	0.672276	91.0534	1.00059
osa-miR1882a	24	AGATTGCTTTCAAGGTCATTTCTT	283.528	0.01		0.01	1	0.01	1	0.01	1		90.9994		40.2581	0.4424	61.1767	0.672276	91.0534	1.00059
osa-miR1882d	24	AGATTGCTTTCAAGGTCATTTCTT	283.528	0.01		0.01	1	0.01	1	0.01	1		90.9994		40.2581	0.4424	61.1767	0.672276	91.0534	1.00059
osa-miR1882e-5p	24	AGATTGCTTTCAAGGTCATTTCTT	283.528	0.01		0.01	1	0.01	1	0.01	1		90.9994		40.2581	0.4424	61.1767	0.672276	91.0534	1.00059
osa-miR1882c	24	AGATTGCTTTCAAGGTCATTTCTT	283.528	0.01		0.01	1	0.01	1	0.01	1		90.9994		40.2581	0.4424	61.1767	0.672276	91.0534	1.00059
osa-miR1882g	24	AGATTGCTTTCAAGGTCATTTCTT	283.528	0.01		0.01	1	0.01	1	0.01	1		90.9994		40.2581	0.4424	61.1767	0.672276	91.0534	1.00059
osa-miR1882h	24	AGATTGCTTTCAAGGTCATTTCTT	255.737	0.01		0.01	1	0.01	1	0.01	1		84.8336		35.7516	0.421432	54.9634	0.647897	80.1488	0.944777
osa-miR167e-3p	21	AGATCATGTTGCAGCTTCACT	197.387	14.238		101.189	7.10693	5.8345	0.409784	4.8286	0.339135		24.4508		9.7641	0.399337	16.0907	0.658085	20.9913	0.858512
osa-miR167i-3p	21	AGATCATGTTGCAGCTTCACT	197.387	14.238		101.189	7.10693	5.8345	0.409784	4.8286	0.339135		24.4508		9.7641	0.399337	16.0907	0.658085	20.9913	0.858512
osa-miR396e-3p	24	ATGGTTCAAGAAAGCCCATGGAAA	190.317	20.0626		75.0753	3.74205	9.7241	0.484688	6.1699	0.307532		26.7896		12.6182	0.471011	16.5687	0.618475	23.3086	0.870062
osa-miR812h	24	AAGACGGATGATTAAAGTTGGACA	192.508	0.01		2.2334	223.34	0.8644	86.44	1.073	107.3		52.0908		24.6356	0.472936	30.907	0.593329	80.694	1.5491
osa-miR812j	24	AAGACGGATGATTAAAGTTGGACA	192.508	0.01		2.2334	223.34	0.8644	86.44	1.073	107.3		52.0908		24.6356	0.472936	30.907	0.593329	80.694	1.5491
osa-miR812i	24	AAGACGGATGATTAAAGTTGGACA	192.508	0.01		2.2334	223.34	0.8644	86.44	1.073	107.3		52.0908		24.6356	0.472936	30.907	0.593329	80.694	1.5491
osa-miR5513	21	TAACAAAGGACAACAGACTGA	120.084	26.103		38.3107	1.46767	4.754	0.182125	5.6334	0.215814		11.4812		5.4078	0.471013	10.6741	0.929702	17.72	1.54339
osa-miR2118o	22	CTCCTGATGCCTCCCAAGCCTA	106.538	16.1795		33.5004	2.07055	7.5632	0.467456	6.8405	0.422788		14.4579		6.7598	0.467551	10.1961	0.705227	11.0409	0.763659
osa-miR2905	21	TACATGTCAGTGACAAAGGCA	174.5	36.6736		19.0695	0.519979	7.5632	0.20623	14.0834	0.38402		30.1914		13.0689	0.432868	17.0466	0.564618	36.803	1.21899
osa-miR408-5p	21	CAGGGATGAGGCAGAGCATGG	157.003	4.746		23.1926	4.88677	7.7793	1.63913	26.6914	5.62398		12.9695		3.455	0.266394	23.1006	1.78115	55.0682	4.24598
osa-miR5083	20	AGACTACAATTATCTGATCA	121.498	18.5525		19.4131	1.04639	10.5885	0.570732	13.0104	0.701275		22.112		10.0645	0.45516	10.0368	0.453907	17.72	0.801375
miR5139-x	18	AACCTGGCTCTGATACCA	2090.09	348.183		793.874	2.28005	176.547	0.507051	79.1352	0.22728		234.94		100.645	0.428387	163.616	0.696415	193.148	0.822114
miR8155-y	18	AACCTGGCTCTGATACCA	1822.51	311.725		699.558	2.24415	170.928	0.548329	65.3201	0.209544		197.095		91.1817	0.462629	138.125	0.700808	148.575	0.753826
miR894-x	19	TTTCACGTCGGGTTCACCA	1910.19	278.072		647.503	2.32855	157.963	0.568064	85.8415	0.308703		287.031		110.86	0.386231	170.626	0.59445	172.293	0.600258
miR8175-y	19	ATCCCCGGCAACGGCGCCA	1527.65	272.032		266.285	0.978877	129.006	0.474233	115.484	0.424523		271.723		126.332	0.464932	177.635	0.653738	169.157	0.622537
miR168-y	21	CTTGCCTTGCACCAAGTGAAT	228.273	25.8872		103.765	4.00837	12.7494	0.492498	12.608	0.487036		17.8597		7.5108	0.420545	14.4976	0.811749	33.3953	1.86987
miR827-y	22	TTAGATGACCATCAGCAAACAG	938.086	72.9157		96.3781	1.32177	136.786	1.87594	103.412	1.41824		202.41		84.4219	0.417084	111.998	0.553322	129.765	0.641098
miR156-x	22	CTTGACAGAAGAGAGTGAGCAC	111.091	7.5504		32.4696	4.30038	3.4575	0.457923	3.4873	0.46187		9.9929		4.9572	0.496072	8.2843	0.829019	40.8922	4.09213
novel-m0113-3p	20	TAGAGAGGGAGGGCAGAGGA	213.919	22.4356		47.7596	2.12874	25.9309	1.15579	12.7421	0.567941		31.2545		15.4723	0.495042	29.1545	0.93281	29.1698	0.933299
																in total:31
																		jn10h≤0.5
osa-miR167h-3p	21	AGGTCATGCTGTAGTTTCATC	454.844	37.105		212.341	5.72271	12.9655	0.349427	9.9254	0.267495		72.5019		39.6573	0.546983	32.1815	0.443871	38.1661	0.526415
osa-miR166j-5p	21	GAATGACGTCCGGTCTGAAGA	991.239	271.6		171.625	0.631904	46.8918	0.17265	39.7017	0.146177		211.978		82.9197	0.391172	75.1963	0.354737	91.326	0.430828
osa-miR5083	20	AGACTACAATTATCTGATCA	121.498	18.5525		19.4131	1.04639	10.5885	0.570732	13.0104	0.701275		22.112		10.0645	0.45516	10.0368	0.453907	17.72	0.801375
novel-m0267-5p	22	AATCGGTACTGCAGTAGCTCTT	1224.37	23.9457		27.1439	1.13356	238.781	9.97176	249.209	10.4072		259.603		158.329	0.609886	106.103	0.408713	161.252	0.621146
																		in total:4
																				jn22h≤0.5
osa-miR166j-5p	21	GAATGACGTCCGGTCTGAAGA	991.239	271.6		171.625	0.631904	46.8918	0.17265	39.7017	0.146177		211.978		82.9197	0.391172	75.1963	0.354737	91.326	0.430828
osa-miR166a-5p	21	GGAATGTTGTCTGGTTCAAGG	142.569	20.4941		47.9314	2.33879	11.885	0.579923	6.1699	0.301057		18.7102		17.7256	0.947376	13.3824	0.715246	6.2701	0.335117
osa-miR166e-5p	21	GGAATGTTGTCTGGTTCAAGG	137.443	20.0626		46.2134	2.30346	11.885	0.592396	5.6334	0.280791		17.4345		17.4252	0.999467	13.0638	0.749307	5.7249	0.328366
osa-miR399i	21	TGCCAAAGGAGAGCTGCCCTG	274.014	32.7905		52.3981	1.59797	37.8159	1.15326	22.2652	0.679014		38.9086		39.9577	1.02696	32.0222	0.823011	17.8563	0.458929
miR5054-y	19	TTCCCCACGGACGGCGCCA	2219.08	398.232		140.53	0.352885	388.532	0.975643	171.817	0.43145		339.972		325.971	0.958816	303.812	0.893639	150.211	0.441833
miR7767-x	20	CCCAAGATGAGTGCTCTCCC	1071.13	56.7362		34.8748	0.614683	492.904	8.68764	140.968	2.48462		120.766		70.6019	0.584619	124.424	1.0303	29.8513	0.247184
novel-m0248-5p	21	CCCGCCACCGGCGCCGCTTCC	445.824	115.198		40.8877	0.354933	76.9284	0.667792	24.2771	0.210742		57.8314		47.0179	0.813017	57.5125	0.994486	26.171	0.45254
																				in total:7

## Sheet: differential in rep3
Table S2. Significantly differentially expressed miRNAs (replicate 3)
				Ziyu44									JNXN
				mock		M. oryzae							mock		M. oryzae
miRNA ID	length	miRNA sequence	total reads	0 hpi_TPM		3 hpi_TPM	3 hpi/0 hpi	10 hpi_TPM	10 hpi/0 hpi	22 hpi_TPM	22 hpi/0 hpi		0 hpi_TPM		3 hpi_TPM	3 hpi/0 hpi	10 hpi_TPM	10 hpi/0 hpi	22 hpi_TPM	22 hpi/0 hpi
							zy3h≥2
osa-miR393b-3p	21	TCAGTGCAATCCCTTTGGAAT	17822.2	1292.06		3078.13	2.38234	2904.2	2.24772	1634.56	1.26507		1445.41		2127.45	1.47187	2737	1.89359	2603.42	1.80117
osa-miR160f-5p	21	TGCCTGGCTCCCTGAATGCCA	7654.6	504.447		1101.16	2.18291	841.563	1.66829	670.294	1.32877		1412.77		981.725	0.694896	1225.16	0.867209	917.479	0.64942
osa-miR399d	21	TGCCAAAGGAGAGTTGCCCTG	1194.11	30.7135		192.845	6.27885	256.819	8.36176	262.714	8.55369		153.943		95.4094	0.619772	111.091	0.72164	90.5791	0.588395
osa-miR399j	21	TGCCAAAGGAGAGTTGCCCTA	1010.2	24.4312		166.353	6.80904	236.184	9.66731	224.3	9.18087		125.444		79.1556	0.631004	90.2946	0.719801	64.0385	0.510495
osa-miR2871a-3p	21	TATTTTAGTTTCTATGGTCAC	7829.07	766.908		1538.46	2.00606	1873.3	2.44267	513.708	0.669843		1037.17		753.035	0.726051	742.627	0.716016	603.861	0.582222
osa-miR2871b	21	TATTTTAGTTTCTATGGTCAC	7825.2	765.977		1537.43	2.00715	1871.91	2.44381	513.057	0.669807		1037.17		752.385	0.725424	743.417	0.716777	603.861	0.582222
osa-miR528-5p	21	TGGAAGGGGCATGCAGAGGAG	5697.03	260.134		812.497	3.12337	649.158	2.49547	526.079	2.02233		996.975		740.032	0.742278	981.921	0.9849	730.233	0.732449
osa-miR408-3p	21	CTGCACTGCCTCTTCCCTGGC	1972.17	104.007		353.349	3.39736	218.059	2.09658	163.423	1.57127		328.59		283.627	0.863166	289.311	0.880463	231.805	0.705453
osa-miR156j-3p	22	GCTCGCTCCTCTTTCTGTCAGC	1807.27	290.848		584.902	2.01102	299.483	1.02969	190.118	0.653666		51.3955		123.203	2.39716	145.577	2.83249	121.746	2.36881
osa-miR398b	21	TGTGTTCTCAGGTCGCCCCTG	829.053	35.3671		112.68	3.186	87.8371	2.48358	158.54	4.48269		79.6508		97.6849	1.22641	138.469	1.73845	118.824	1.49181
osa-miR159d	21	ATTGGATTGAAGGGAGCTCCG	1438.14	84.9276		209.36	2.46516	229.771	2.70549	269.876	3.17771		259.657		145.146	0.558991	123.99	0.477517	115.415	0.444492
osa-miR2090	22	AACTCTGATTCTAGAATTTTTG	1523.12	74.6898		212.629	2.84683	328.483	4.39796	112.638	1.50808		232.619		208.048	0.89437	152.158	0.654108	201.855	0.867749
osa-miR159c	21	ATTGGATTGAAGGGAGCTCCA	1421.62	82.8335		206.608	2.49426	228.376	2.75705	265.318	3.20303		258.195		143.845	0.557119	123.464	0.478181	112.98	0.437577
osa-miR159e	21	ATTGGATTGAAGGGAGCTCCT	1416.03	82.8335		205.576	2.48179	226.982	2.74022	265.318	3.20303		257.221		142.708	0.554806	122.411	0.475898	112.98	0.439235
osa-miR1320-3p	21	TGTAAAATTCATTCGTTCCAA	2034.77	99.819		205.06	2.05431	232.001	2.32422	167.655	1.67959		78.6765		245.269	3.11743	420.936	5.35021	585.355	7.44003
osa-miR3980a-5p	21	AATCGACGGCCTCAGTCAGGG	1517.13	131.231		380.874	2.90233	661.706	5.04231	342.798	2.61218		0.01		0.01	1	0.01	1	0.487	48.7
osa-miR3980b-5p	21	AATCGACGGCCTCAGTCAGGG	1517.13	131.231		380.874	2.90233	661.706	5.04231	342.798	2.61218		0.01		0.01	1	0.01	1	0.487	48.7
osa-miR2864.2	21	TTGTTTTGCATTGTATAGGTA	834.771	64.4519		157.235	2.43958	141.376	2.19351	73.2473	1.13646		140.059		87.9326	0.627827	87.9253	0.627775	82.5439	0.589352
osa-miR1857-3p	21	TCATGCTCCAAGAAAACCAGG	1089.12	102.611		253.056	2.46616	111.26	1.08429	88.5479	0.862946		79.8944		170.339	2.13205	158.739	1.98687	124.668	1.56041
osa-miR5082	24	TGCGATGATGGCCGCGCGGGTTCA	716.609	39.09		97.1969	2.48649	136.635	3.49541	258.482	6.61248		52.8569		54.6125	1.03321	49.4909	0.936319	28.2451	0.534369
osa-miR530-5p	20	TGCATTTGCACCTGCACCTA	936.596	46.0703		135.56	2.94245	131.895	2.86291	164.4	3.56845		131.046		129.055	0.984802	108.722	0.829646	89.8486	0.685625
osa-miR2877	24	TTGCATCCTCTGCACTTTGGGCCT	402.318	20.9411		107.519	5.13434	70.5485	3.3689	67.3876	3.21796		49.934		19.3419	0.387349	34.7489	0.695897	31.8975	0.638793
osa-miR530-3p	21	AGGTGCAGAGGCAGATGCAAC	640.708	6.2823		14.6225	2.32757	66.3658	10.5639	29.95	4.76736		146.392		157.011	1.07254	126.097	0.861363	93.988	0.64203
osa-miR1320-5p	21	TGGAACGGAGGAATTTTATAG	651.35	21.4064		116.464	5.44063	93.9717	4.38989	65.4343	3.05676		25.8195		107.275	4.15479	125.043	4.84299	95.9359	3.71564
osa-miR2876-3p	21	TTCCTATATGAACACTGTTGC	158.838	12.5646		35.2661	2.80678	38.481	3.06265	8.7897	0.699561		23.8709		15.2785	0.640047	12.8992	0.540373	11.6876	0.489617
osa-miR1432-3p	21	CAGGTGTCATCTCCCCTGAAC	208.007	5.1189		22.7079	4.43609	58.8369	11.4941	16.9283	3.30702		27.281		42.7473	1.56693	23.4292	0.85881	10.9572	0.401642
osa-miR2275d	22	CTTGTTTTTCTCCAATATCTCA	133.61	12.0993		33.3738	2.75832	15.6155	1.29061	8.1386	0.67265		7.551		15.2785	2.02337	21.5865	2.85876	19.9664	2.64421
osa-miR166e-3p	21	TCGAACCAGGCTTCATTCCCC	115.428	10.9359		24.0842	2.20231	9.7597	0.892446	7.162	0.654907		13.6405		18.2042	1.33457	16.0582	1.17724	15.5835	1.14244
osa-miR1846d-3p	20	TATCCGGCGCCGCAGGGAGG	124.5	6.0496		12.3862	2.04744	22.3078	3.68748	11.0685	1.82963		19.4864		16.0912	0.825766	20.7967	1.06724	16.314	0.837199
osa-miR1857-5p	21	TGGTTTTTTTGGAGCATGAGG	112.214	11.1686		23.7401	2.12561	14.2212	1.27332	11.394	1.02018		15.102		10.4024	0.688809	14.742	0.976162	11.4441	0.757787
miR9774-y	23	AGCAAGATATTGGGTATTTCTTT	61601.9	4630.3		9598.41	2.07296	10300.9	2.22468	10115.3	2.18459		5694.18		5763.41	1.01216	9163.71	1.60931	6335.67	1.11266
miR9773-y	26	TTTTTTTTTATGTTATTTTGTGAAGG	1774.56	103.076		346.124	3.35793	318.444	3.0894	153.657	1.4907		241.875		203.334	0.840657	220.077	0.909876	187.976	0.777161
miR9664-y	22	ATGCAGTCCTCGATGTCGTAGG	659.937	36.7632		73.9728	2.01214	144.722	3.9366	107.755	2.93106		103.765		68.1031	0.656319	57.6516	0.555597	67.2039	0.647654
miR5825-y	24	AAAACATCTTATAATCTGAAACGG	155.29	12.0993		31.4815	2.60193	17.2886	1.42889	13.3473	1.10315		14.8584		21.2924	1.43302	21.06	1.41738	23.8622	1.60597
miR2679-x	21	CTTTTCACTTTCGACCGGGTA	174.574	12.5646		39.0508	3.108	20.9136	1.66449	16.6027	1.32139		15.3456		20.8048	1.35575	27.3779	1.78409	21.9143	1.42805
novel-m0267-5p	22	AATCGGTACTGCAGTAGCTCTT	459.083	5.3516		14.2785	2.66808	26.4905	4.95001	353.215	66.0017		25.5759		17.554	0.686349	10.53	0.411716	6.0873	0.238009
novel-m0239-5p	21	AATTTGTCCAGCTTACAGTCT	433.108	35.1344		84.8107	2.41389	78.3562	2.23018	26.369	0.750518		60.1644		52.4995	0.872601	49.7542	0.826971	46.02	0.764904
novel-m0278-5p	21	AATTTGTCCAGCTTACAGTCT	433.108	35.1344		84.8107	2.41389	78.3562	2.23018	26.369	0.750518		60.1644		52.4995	0.872601	49.7542	0.826971	46.02	0.764904
novel-m0613-3p	21	ACTAGCTGGATTGATTCCAAA	349.683	35.3671		83.2625	2.35424	143.607	4.06046	78.7816	2.22754		1.7051		2.9257	1.71585	1.8427	1.0807	2.1914	1.2852
							in total:39
									zy10h≥2
osa-miR393b-5p	22	TCCAAAGGGATCGCATTGATCT	122653	9683.61		10198.6	1.05318	29790.4	3.07638	15305.1	1.58052		16814.1		16363.3	0.973187	14167.6	0.842599	10330.4	0.614389
osa-miR393a	21	TCCAAAGGGATCGCATTGATC	121204	9660.81		10096.6	1.04511	29451.6	3.04857	15090.6	1.56204		16740.1		16144.8	0.964442	13846.4	0.827141	10172.6	0.607681
osa-miR1425-5p	21	TAGGATTCAATCCTTGCTGCT	32186.2	3042.04		3128.71	1.02849	7455	2.45066	4562.82	1.49992		4216.62		4698.14	1.1142	3195.06	0.75773	1887.8	0.447703
osa-miR6251	21	TGTGTAGCCACATTGTAAGGG	19317.3	1695.99		2223.31	1.31092	4101.57	2.41839	2156.4	1.27147		3265.93		2255.37	0.690575	2043.08	0.625574	1575.64	0.482448
osa-miR397a	21	TCATTGAGTGCAGCGTTGATG	18156.2	458.842		859.633	1.87349	1418.22	3.09087	795.629	1.73399		5297.14		3488.7	0.6586	2985.25	0.563558	2852.76	0.538546
osa-miR397b	21	TTATTGAGTGCAGCGTTGATG	17658.8	425.801		813.357	1.91018	1337.91	3.1421	755.913	1.77527		5198.98		3411.33	0.656154	2920.49	0.561743	2795.05	0.537615
osa-miR393b-3p	21	TCAGTGCAATCCCTTTGGAAT	17822.2	1292.06		3078.13	2.38234	2904.2	2.24772	1634.56	1.26507		1445.41		2127.45	1.47187	2737	1.89359	2603.42	1.80117
osa-miR169i-5p.2	22	TGGTGATAAGGGTGTAGCTCTG	11523	891.856		772.242	0.865882	2567.91	2.87929	2516.13	2.82123		649.385		736.781	1.13458	1765.09	2.71809	1623.61	2.50022
osa-miR399d	21	TGCCAAAGGAGAGTTGCCCTG	1194.11	30.7135		192.845	6.27885	256.819	8.36176	262.714	8.55369		153.943		95.4094	0.619772	111.091	0.72164	90.5791	0.588395
osa-miR399j	21	TGCCAAAGGAGAGTTGCCCTA	1010.2	24.4312		166.353	6.80904	236.184	9.66731	224.3	9.18087		125.444		79.1556	0.631004	90.2946	0.719801	64.0385	0.510495
osa-miR1432-5p	21	ATCAGGAGAGATGACACCGAC	10370.6	361.117		698.097	1.93316	953.381	2.64009	954.494	2.64317		626.002		2309.49	3.68927	2565.1	4.0976	1902.89	3.03976
osa-miR169i-3p	22	TGAGTCGCTCTTATCACTCATG	9525.63	641.262		1269.24	1.97928	2313.88	3.60832	1017.98	1.58746		1297.31		987.251	0.760999	1114.6	0.859162	884.12	0.681503
osa-miR2871a-3p	21	TATTTTAGTTTCTATGGTCAC	7829.07	766.908		1538.46	2.00606	1873.3	2.44267	513.708	0.669843		1037.17		753.035	0.726051	742.627	0.716016	603.861	0.582222
osa-miR2871b	21	TATTTTAGTTTCTATGGTCAC	7825.2	765.977		1537.43	2.00715	1871.91	2.44381	513.057	0.669807		1037.17		752.385	0.725424	743.417	0.716777	603.861	0.582222
osa-miR528-5p	21	TGGAAGGGGCATGCAGAGGAG	5697.03	260.134		812.497	3.12337	649.158	2.49547	526.079	2.02233		996.975		740.032	0.742278	981.921	0.9849	730.233	0.732449
osa-miR169j	21	TAGCCAAGGATGACTTGCCTG	5659.94	304.809		322.556	1.05822	675.369	2.21572	481.479	1.57961		400.446		1158.4	2.89278	1236.75	3.08842	1080.13	2.69732
osa-miR169i-5p.1	21	TAGCCAAGGATGACTTGCCTG	5659.94	304.809		322.556	1.05822	675.369	2.21572	481.479	1.57961		400.446		1158.4	2.89278	1236.75	3.08842	1080.13	2.69732
osa-miR169h	21	TAGCCAAGGATGACTTGCCTG	5659.94	304.809		322.556	1.05822	675.369	2.21572	481.479	1.57961		400.446		1158.4	2.89278	1236.75	3.08842	1080.13	2.69732
osa-miR169l	21	TAGCCAAGGATGACTTGCCTG	5658.64	304.809		322.556	1.05822	675.369	2.21572	481.479	1.57961		399.959		1157.59	2.89427	1236.75	3.09218	1080.13	2.70061
osa-miR169k	21	TAGCCAAGGATGACTTGCCTG	5658.64	304.809		322.556	1.05822	675.369	2.21572	481.479	1.57961		399.959		1157.59	2.89427	1236.75	3.09218	1080.13	2.70061
osa-miR169m	21	TAGCCAAGGATGACTTGCCTG	5625.41	299.69		320.32	1.06884	669.792	2.23495	477.247	1.59247		397.036		1155.15	2.90944	1230.43	3.09903	1075.75	2.70945
osa-miR7695-3p	21	ACGTGATGTGCCACGTAGGCA	1895.66	124.948		198.867	1.59159	439.185	3.51494	326.52	2.61324		283.771		216.662	0.76351	147.683	0.52043	158.026	0.55688
osa-miR408-3p	21	CTGCACTGCCTCTTCCCTGGC	1972.17	104.007		353.349	3.39736	218.059	2.09658	163.423	1.57127		328.59		283.627	0.863166	289.311	0.880463	231.805	0.705453
osa-miR5072	22	CGATTCCCCAGCGGAGTCGCCA	1818.54	324.586		164.977	0.508267	743.129	2.28947	243.507	0.750206		150.046		119.79	0.798357	38.1712	0.254397	34.3324	0.228813
osa-miR444f	21	TGCAGTTGTTGCCTCAAGCTT	1319.31	44.4416		79.8219	1.79611	106.52	2.39685	57.9468	1.30389		311.052		225.114	0.723718	257.985	0.829393	236.431	0.760101
osa-miR398b	21	TGTGTTCTCAGGTCGCCCCTG	829.053	35.3671		112.68	3.186	87.8371	2.48358	158.54	4.48269		79.6508		97.6849	1.22641	138.469	1.73845	118.824	1.49181
osa-miR159d	21	ATTGGATTGAAGGGAGCTCCG	1438.14	84.9276		209.36	2.46516	229.771	2.70549	269.876	3.17771		259.657		145.146	0.558991	123.99	0.477517	115.415	0.444492
osa-miR2090	22	AACTCTGATTCTAGAATTTTTG	1523.12	74.6898		212.629	2.84683	328.483	4.39796	112.638	1.50808		232.619		208.048	0.89437	152.158	0.654108	201.855	0.867749
osa-miR159c	21	ATTGGATTGAAGGGAGCTCCA	1421.62	82.8335		206.608	2.49426	228.376	2.75705	265.318	3.20303		258.195		143.845	0.557119	123.464	0.478181	112.98	0.437577
osa-miR159e	21	ATTGGATTGAAGGGAGCTCCT	1416.03	82.8335		205.576	2.48179	226.982	2.74022	265.318	3.20303		257.221		142.708	0.554806	122.411	0.475898	112.98	0.439235
osa-miR1320-3p	21	TGTAAAATTCATTCGTTCCAA	2034.77	99.819		205.06	2.05431	232.001	2.32422	167.655	1.67959		78.6765		245.269	3.11743	420.936	5.35021	585.355	7.44003
osa-miR7695-5p	24	TGCCTATGTGGCACGCCACGTGAA	626.902	62.8232		43.0075	0.68458	206.347	3.28457	89.5245	1.42502		68.9332		61.4391	0.891285	56.5986	0.821064	38.2283	0.55457
osa-miR159a.2	21	TTGCATGCCCCAGGAGCTGCA	1011.66	85.8583		76.5533	0.891624	229.492	2.67291	110.034	1.28157		135.187		166.926	1.23478	125.307	0.926914	82.3004	0.608789
osa-miR162b	21	TCGATAAGCCTCTGCATCCAG	1179.22	79.1106		152.418	1.92665	170.655	2.15717	84.3158	1.0658		247.965		152.46	0.614845	150.579	0.607258	141.713	0.571502
osa-miR3980a-5p	21	AATCGACGGCCTCAGTCAGGG	1517.13	131.231		380.874	2.90233	661.706	5.04231	342.798	2.61218		0.01		0.01	1	0.01	1	0.487	48.7
osa-miR3980b-5p	21	AATCGACGGCCTCAGTCAGGG	1517.13	131.231		380.874	2.90233	661.706	5.04231	342.798	2.61218		0.01		0.01	1	0.01	1	0.487	48.7
osa-miR2864.2	21	TTGTTTTGCATTGTATAGGTA	834.771	64.4519		157.235	2.43958	141.376	2.19351	73.2473	1.13646		140.059		87.9326	0.627827	87.9253	0.627775	82.5439	0.589352
osa-miR5082	24	TGCGATGATGGCCGCGCGGGTTCA	716.609	39.09		97.1969	2.48649	136.635	3.49541	258.482	6.61248		52.8569		54.6125	1.03321	49.4909	0.936319	28.2451	0.534369
osa-miR530-5p	20	TGCATTTGCACCTGCACCTA	936.596	46.0703		135.56	2.94245	131.895	2.86291	164.4	3.56845		131.046		129.055	0.984802	108.722	0.829646	89.8486	0.685625
osa-miR2877	24	TTGCATCCTCTGCACTTTGGGCCT	402.318	20.9411		107.519	5.13434	70.5485	3.3689	67.3876	3.21796		49.934		19.3419	0.387349	34.7489	0.695897	31.8975	0.638793
osa-miR5827	21	TTTGTTGCAATTTGGACTACC	478.208	34.9018		55.2216	1.5822	136.914	3.92284	25.718	0.736867		85.2531		59.9762	0.703508	43.6994	0.512584	36.5238	0.428416
osa-miR530-3p	21	AGGTGCAGAGGCAGATGCAAC	640.708	6.2823		14.6225	2.32757	66.3658	10.5639	29.95	4.76736		146.392		157.011	1.07254	126.097	0.861363	93.988	0.64203
osa-miR1320-5p	21	TGGAACGGAGGAATTTTATAG	651.35	21.4064		116.464	5.44063	93.9717	4.38989	65.4343	3.05676		25.8195		107.275	4.15479	125.043	4.84299	95.9359	3.71564
osa-miR2876-3p	21	TTCCTATATGAACACTGTTGC	158.838	12.5646		35.2661	2.80678	38.481	3.06265	8.7897	0.699561		23.8709		15.2785	0.640047	12.8992	0.540373	11.6876	0.489617
osa-miR1432-3p	21	CAGGTGTCATCTCCCCTGAAC	208.007	5.1189		22.7079	4.43609	58.8369	11.4941	16.9283	3.30702		27.281		42.7473	1.56693	23.4292	0.85881	10.9572	0.401642
osa-miR5811	24	CCTAACCTAGGAGTTCGATGGGAC	106.552	8.8418		12.5582	1.42032	25.3751	2.8699	29.2989	3.31368		12.9098		6.1764	0.478427	5.7915	0.448613	5.6003	0.433802
osa-miR1431	21	TTTGCGAGTTGGCCCGCTTGC	137.76	10.7032		17.547	1.63942	26.2117	2.44896	13.9984	1.30787		16.3199		15.9287	0.976029	20.007	1.22593	17.0445	1.0444
osa-miR1846d-3p	20	TATCCGGCGCCGCAGGGAGG	124.5	6.0496		12.3862	2.04744	22.3078	3.68748	11.0685	1.82963		19.4864		16.0912	0.825766	20.7967	1.06724	16.314	0.837199
osa-miR169f.2	21	TGAGGACAAGAGCTGATTCGG	110.334	12.332		16.3428	1.32524	24.8175	2.01245	18.2304	1.4783		11.6919		8.9395	0.764589	9.2137	0.788041	8.7657	0.749724
miR9774-y	23	AGCAAGATATTGGGTATTTCTTT	61601.9	4630.3		9598.41	2.07296	10300.9	2.22468	10115.3	2.18459		5694.18		5763.41	1.01216	9163.71	1.60931	6335.67	1.11266
miR5054-y	19	TTCCCCACGGACGGCGCCA	2092.48	297.828		238.605	0.801151	685.129	2.30042	215.184	0.722512		330.051		209.185	0.633796	59.7576	0.181055	56.7337	0.171894
miR9773-y	26	TTTTTTTTTATGTTATTTTGTGAAGG	1774.56	103.076		346.124	3.35793	318.444	3.0894	153.657	1.4907		241.875		203.334	0.840657	220.077	0.909876	187.976	0.777161
miR169-y	22	TGAGTCGCTCTTATCACTCATT	1337	96.3288		170.137	1.76622	312.588	3.24501	138.682	1.43967		155.404		176.028	1.13271	169.006	1.08753	118.824	0.764613
miR7767-x	20	CCCAAGATGAGTGCTCTCCC	519.384	45.3723		74.1449	1.63414	106.241	2.34154	94.7332	2.08791		80.8687		47.9485	0.592918	35.0122	0.432951	35.0629	0.433578
miR9664-y	22	ATGCAGTCCTCGATGTCGTAGG	659.937	36.7632		73.9728	2.01214	144.722	3.9366	107.755	2.93106		103.765		68.1031	0.656319	57.6516	0.555597	67.2039	0.647654
miR397-x	22	TTGAGTGCAGCGTTGATGAACT	382.796	8.3764		14.2785	1.70461	26.2117	3.12923	12.3707	1.47685		106.688		80.781	0.757169	76.8688	0.7205	57.2207	0.536336
miR5169-x	24	AGTTTGACCAAGTTTGTAGAAAAA	172.333	11.8666		15.1386	1.27573	27.6059	2.32635	21.1603	1.78318		21.6787		28.7691	1.32707	23.9557	1.10503	22.1578	1.0221
miR6300-y	18	GTCGTTGTAGTATAGTGA	191.941	22.1044		11.526	0.521435	77.5197	3.50698	40.693	1.84095		6.5767		32.5074	4.94281	0.5265	0.0800553	0.487	0.0740493
novel-m0574-3p	20	GGGTTTGATTGTGTCATAGT	5456.53	557.265		937.391	1.68213	1223.58	2.1957	570.678	1.02407		544.159		455.267	0.836644	592.575	1.08897	575.616	1.05781
novel-m0267-5p	22	AATCGGTACTGCAGTAGCTCTT	459.083	5.3516		14.2785	2.66808	26.4905	4.95001	353.215	66.0017		25.5759		17.554	0.686349	10.53	0.411716	6.0873	0.238009
novel-m0601-3p	22	GGACCGATTTATCGGATTGGGA	484.199	40.7187		40.083	0.984388	92.2986	2.26674	78.1305	1.91879		65.7667		61.6016	0.936669	57.3884	0.872606	48.2115	0.733069
novel-m0104-3p	22	GGACCGATTTATCGGATTGGGA	484.199	40.7187		40.083	0.984388	92.2986	2.26674	78.1305	1.91879		65.7667		61.6016	0.936669	57.3884	0.872606	48.2115	0.733069
novel-m0362-3p	22	GGACCGATTTATCGGATTGGGA	484.199	40.7187		40.083	0.984388	92.2986	2.26674	78.1305	1.91879		65.7667		61.6016	0.936669	57.3884	0.872606	48.2115	0.733069
novel-m0032-3p	22	GGACCGATTTATCGGATTGGGA	482.841	40.7187		39.7389	0.975937	92.2986	2.26674	78.1305	1.91879		65.7667		61.114	0.929254	56.8619	0.8646	48.2115	0.733069
novel-m0239-5p	21	AATTTGTCCAGCTTACAGTCT	433.108	35.1344		84.8107	2.41389	78.3562	2.23018	26.369	0.750518		60.1644		52.4995	0.872601	49.7542	0.826971	46.02	0.764904
novel-m0278-5p	21	AATTTGTCCAGCTTACAGTCT	433.108	35.1344		84.8107	2.41389	78.3562	2.23018	26.369	0.750518		60.1644		52.4995	0.872601	49.7542	0.826971	46.02	0.764904
novel-m0613-3p	21	ACTAGCTGGATTGATTCCAAA	349.683	35.3671		83.2625	2.35424	143.607	4.06046	78.7816	2.22754		1.7051		2.9257	1.71585	1.8427	1.0807	2.1914	1.2852
novel-m0214-5p	21	ATTTGATTTGTCGCGAGCAAT	263.654	16.2875		29.7612	1.82724	37.9233	2.32837	27.9968	1.71891		36.5371		33.3201	0.911953	32.6429	0.893418	49.1854	1.34618
									in total：68
											zy22h≥2
osa-miR159a.1	21	TTTGGATTGAAGGGAGCTCTG	1.88562e+06	164035		283867	1.73053	280782	1.71172	397187	2.42136		296298		160730	0.542462	153545	0.518213	149179	0.503477
osa-miR159b	21	TTTGGATTGAAGGGAGCTCTG	1.88562e+06	164035		283867	1.73053	280782	1.71172	397187	2.42136		296298		160730	0.542462	153545	0.518213	149179	0.503477
osa-miR168a-3p	24	GATCCCGCCTTGCACCAAGTGAAT	137505	13133.8		20946.4	1.59485	14498.4	1.1039	26348.2	2.00614		8063.73		18788.3	2.32998	18225	2.26012	17501	2.17034
osa-miR169i-5p.2	22	TGGTGATAAGGGTGTAGCTCTG	11523	891.856		772.242	0.865882	2567.91	2.87929	2516.13	2.82123		649.385		736.781	1.13458	1765.09	2.71809	1623.61	2.50022
osa-miR169a	21	CAGCCAAGGATGACTTGCCGA	16309.8	1075.21		1395.68	1.29806	2056.22	1.9124	3059.46	2.84546		764.599		2202.22	2.88023	2909.96	3.80586	2846.42	3.72277
osa-miR159f	21	CTTGGATTGAAGGGAGCTCTA	5913.39	501.189		961.991	1.91942	771.851	1.54004	1377.38	2.74821		997.462		472.821	0.474024	485.432	0.486667	345.272	0.346151
osa-miR399d	21	TGCCAAAGGAGAGTTGCCCTG	1194.11	30.7135		192.845	6.27885	256.819	8.36176	262.714	8.55369		153.943		95.4094	0.619772	111.091	0.72164	90.5791	0.588395
osa-miR399j	21	TGCCAAAGGAGAGTTGCCCTA	1010.2	24.4312		166.353	6.80904	236.184	9.66731	224.3	9.18087		125.444		79.1556	0.631004	90.2946	0.719801	64.0385	0.510495
osa-miR1432-5p	21	ATCAGGAGAGATGACACCGAC	10370.6	361.117		698.097	1.93316	953.381	2.64009	954.494	2.64317		626.002		2309.49	3.68927	2565.1	4.0976	1902.89	3.03976
osa-miR528-5p	21	TGGAAGGGGCATGCAGAGGAG	5697.03	260.134		812.497	3.12337	649.158	2.49547	526.079	2.02233		996.975		740.032	0.742278	981.921	0.9849	730.233	0.732449
osa-miR7695-3p	21	ACGTGATGTGCCACGTAGGCA	1895.66	124.948		198.867	1.59159	439.185	3.51494	326.52	2.61324		283.771		216.662	0.76351	147.683	0.52043	158.026	0.55688
osa-miR398b	21	TGTGTTCTCAGGTCGCCCCTG	829.053	35.3671		112.68	3.186	87.8371	2.48358	158.54	4.48269		79.6508		97.6849	1.22641	138.469	1.73845	118.824	1.49181
osa-miR159d	21	ATTGGATTGAAGGGAGCTCCG	1438.14	84.9276		209.36	2.46516	229.771	2.70549	269.876	3.17771		259.657		145.146	0.558991	123.99	0.477517	115.415	0.444492
osa-miR159c	21	ATTGGATTGAAGGGAGCTCCA	1421.62	82.8335		206.608	2.49426	228.376	2.75705	265.318	3.20303		258.195		143.845	0.557119	123.464	0.478181	112.98	0.437577
osa-miR159e	21	ATTGGATTGAAGGGAGCTCCT	1416.03	82.8335		205.576	2.48179	226.982	2.74022	265.318	3.20303		257.221		142.708	0.554806	122.411	0.475898	112.98	0.439235
osa-miR3980a-5p	21	AATCGACGGCCTCAGTCAGGG	1517.13	131.231		380.874	2.90233	661.706	5.04231	342.798	2.61218		0.01		0.01	1	0.01	1	0.487	48.7
osa-miR3980b-5p	21	AATCGACGGCCTCAGTCAGGG	1517.13	131.231		380.874	2.90233	661.706	5.04231	342.798	2.61218		0.01		0.01	1	0.01	1	0.487	48.7
osa-miR5082	24	TGCGATGATGGCCGCGCGGGTTCA	716.609	39.09		97.1969	2.48649	136.635	3.49541	258.482	6.61248		52.8569		54.6125	1.03321	49.4909	0.936319	28.2451	0.534369
osa-miR1882b	24	AGATTGCTTTCAAGGTCATTTCTT	993.333	0.01		0.01	1	0.01	1	0.9766	97.66		141.52		259.735	1.83532	313.004	2.21172	278.068	1.96487
osa-miR1882f	24	AGATTGCTTTCAAGGTCATTTCTT	993.333	0.01		0.01	1	0.01	1	0.9766	97.66		141.52		259.735	1.83532	313.004	2.21172	278.068	1.96487
osa-miR1882a	24	AGATTGCTTTCAAGGTCATTTCTT	993.333	0.01		0.01	1	0.01	1	0.9766	97.66		141.52		259.735	1.83532	313.004	2.21172	278.068	1.96487
osa-miR1882d	24	AGATTGCTTTCAAGGTCATTTCTT	993.333	0.01		0.01	1	0.01	1	0.9766	97.66		141.52		259.735	1.83532	313.004	2.21172	278.068	1.96487
osa-miR1882e-5p	24	AGATTGCTTTCAAGGTCATTTCTT	993.333	0.01		0.01	1	0.01	1	0.9766	97.66		141.52		259.735	1.83532	313.004	2.21172	278.068	1.96487
osa-miR1882c	24	AGATTGCTTTCAAGGTCATTTCTT	993.333	0.01		0.01	1	0.01	1	0.9766	97.66		141.52		259.735	1.83532	313.004	2.21172	278.068	1.96487
osa-miR1882g	24	AGATTGCTTTCAAGGTCATTTCTT	993.333	0.01		0.01	1	0.01	1	0.9766	97.66		141.52		259.735	1.83532	313.004	2.21172	278.068	1.96487
osa-miR1882h	24	AGATTGCTTTCAAGGTCATTTCTT	883.379	0.01		0.01	1	0.01	1	0.9766	97.66		129.098		236.654	1.83314	274.832	2.12887	241.788	1.87291
osa-miR530-5p	20	TGCATTTGCACCTGCACCTA	936.596	46.0703		135.56	2.94245	131.895	2.86291	164.4	3.56845		131.046		129.055	0.984802	108.722	0.829646	89.8486	0.685625
osa-miR2877	24	TTGCATCCTCTGCACTTTGGGCCT	402.318	20.9411		107.519	5.13434	70.5485	3.3689	67.3876	3.21796		49.934		19.3419	0.387349	34.7489	0.695897	31.8975	0.638793
osa-miR530-3p	21	AGGTGCAGAGGCAGATGCAAC	640.708	6.2823		14.6225	2.32757	66.3658	10.5639	29.95	4.76736		146.392		157.011	1.07254	126.097	0.861363	93.988	0.64203
osa-miR1320-5p	21	TGGAACGGAGGAATTTTATAG	651.35	21.4064		116.464	5.44063	93.9717	4.38989	65.4343	3.05676		25.8195		107.275	4.15479	125.043	4.84299	95.9359	3.71564
osa-miR1423-3p	21	AGCGCCCAAGCGGTAGTTGTC	369.776	34.9018		34.75	0.995651	68.0389	1.94944	71.2941	2.04271		39.46		50.8742	1.28926	46.5952	1.18082	23.8622	0.604719
osa-miR1432-3p	21	CAGGTGTCATCTCCCCTGAAC	208.007	5.1189		22.7079	4.43609	58.8369	11.4941	16.9283	3.30702		27.281		42.7473	1.56693	23.4292	0.85881	10.9572	0.401642
osa-miR5811	24	CCTAACCTAGGAGTTCGATGGGAC	106.552	8.8418		12.5582	1.42032	25.3751	2.8699	29.2989	3.31368		12.9098		6.1764	0.478427	5.7915	0.448613	5.6003	0.433802
miR9774-y	23	AGCAAGATATTGGGTATTTCTTT	61601.9	4630.3		9598.41	2.07296	10300.9	2.22468	10115.3	2.18459		5694.18		5763.41	1.01216	9163.71	1.60931	6335.67	1.11266
miR8175-y	19	ATCCCCGGCAACGGCGCCA	2854.14	289.452		241.53	0.834439	559.369	1.93251	750.704	2.59354		330.539		399.842	1.20967	136.363	0.412548	146.339	0.442728
miR7767-x	20	CCCAAGATGAGTGCTCTCCC	519.384	45.3723		74.1449	1.63414	106.241	2.34154	94.7332	2.08791		80.8687		47.9485	0.592918	35.0122	0.432951	35.0629	0.433578
miR9664-y	22	ATGCAGTCCTCGATGTCGTAGG	659.937	36.7632		73.9728	2.01214	144.722	3.9366	107.755	2.93106		103.765		68.1031	0.656319	57.6516	0.555597	67.2039	0.647654
miR6478-x	20	CCGACCTTAGCTCAGTTGGA	336.281	33.273		12.3862	0.37226	35.6925	1.07272	132.496	3.9821		35.0756		53.7998	1.53382	22.113	0.630438	11.4441	0.32627
novel-m0485-3p	22	AACACCGGATTCGAATCTTTTG	3202.99	0.4654		0.01	0.0214869	0.01	0.0214869	1.6277	3.49742		559.504		935.239	1.67155	937.431	1.67547	768.705	1.3739
novel-m0267-5p	22	AATCGGTACTGCAGTAGCTCTT	459.083	5.3516		14.2785	2.66808	26.4905	4.95001	353.215	66.0017		25.5759		17.554	0.686349	10.53	0.411716	6.0873	0.238009
novel-m0502-3p	20	CGGCGATGAGGAAGAACATG	1127.22	74.6898		52.4691	0.702494	81.4236	1.09016	720.103	9.64125		46.0367		61.2765	1.33104	53.9661	1.17224	37.2543	0.80923
novel-m0613-3p	21	ACTAGCTGGATTGATTCCAAA	349.683	35.3671		83.2625	2.35424	143.607	4.06046	78.7816	2.22754		1.7051		2.9257	1.71585	1.8427	1.0807	2.1914	1.2852
novel-m0257-5p	21	CAGATTTGGTCAAGAGGAAGA	431.36	3.4902		1.0322	0.295742	5.8558	1.67778	403.023	115.473		4.3844		7.1516	1.63115	4.4752	1.02071	1.9479	0.44428
											in total：43
																jn3h≥2
osa-miR156d	20	TGACAGAAGAGAGTGAGCAC	155508	22044.2		20478.3	0.928965	11661.1	0.528989	15438.9	0.700362		6913.79		26907.2	3.89182	27354.8	3.95656	24710.1	3.57403
osa-miR156f-5p	20	TGACAGAAGAGAGTGAGCAC	155133	22008.3		20431.5	0.928351	11631	0.528482	15407	0.700053		6894.54		26836	3.89236	27291.6	3.95844	24632.6	3.57277
osa-miR156j-5p	20	TGACAGAAGAGAGTGAGCAC	155133	22008.3		20431.5	0.928351	11631	0.528482	15407	0.700053		6894.54		26836	3.89236	27291.6	3.95844	24632.6	3.57277
osa-miR156h-5p	20	TGACAGAAGAGAGTGAGCAC	155133	22008.3		20431.5	0.928351	11631	0.528482	15407	0.700053		6894.54		26836	3.89236	27291.6	3.95844	24632.6	3.57277
osa-miR168a-3p	24	GATCCCGCCTTGCACCAAGTGAAT	137505	13133.8		20946.4	1.59485	14498.4	1.1039	26348.2	2.00614		8063.73		18788.3	2.32998	18225	2.26012	17501	2.17034
osa-miR156b-5p	20	TGACAGAAGAGAGTGAGCAC	57709.9	8706.59		7388.85	0.848651	4352.81	0.499945	5933.03	0.681442		2676.7		10221	3.8185	10239.6	3.82546	8191.32	3.06023
osa-miR156c-5p	20	TGACAGAAGAGAGTGAGCAC	57704.1	8706.59		7387.99	0.848552	4351.7	0.499817	5933.03	0.681442		2676.7		10220.2	3.81819	10237.8	3.82477	8190.11	3.05977
osa-miR156g-5p	20	TGACAGAAGAGAGTGAGCAC	57704.1	8706.59		7387.99	0.848552	4351.7	0.499817	5933.03	0.681442		2676.7		10220.2	3.81819	10237.8	3.82477	8190.11	3.05977
osa-miR156a	20	TGACAGAAGAGAGTGAGCAC	57422.3	8658.43		7357.37	0.849736	4331.06	0.500214	5903.41	0.681811		2661.85		10171.1	3.82107	10190.4	3.82832	8148.71	3.0613
osa-miR156i	20	TGACAGAAGAGAGTGAGCAC	57422.3	8658.43		7357.37	0.849736	4331.06	0.500214	5903.41	0.681811		2661.85		10171.1	3.82107	10190.4	3.82832	8148.71	3.0613
osa-miR156e	20	TGACAGAAGAGAGTGAGCAC	57422.3	8658.43		7357.37	0.849736	4331.06	0.500214	5903.41	0.681811		2661.85		10171.1	3.82107	10190.4	3.82832	8148.71	3.0613
osa-miR156h-3p	22	GCTCACTTCTCTTTCTGTCAGC	24415	1712.75		2308.3	1.34772	1451.12	0.84725	617.231	0.360375		2303.05		5696.77	2.47357	6089.22	2.64398	4236.52	1.83952
osa-miR156f-3p	22	GCTCACTTCTCTTTCTGTCAGC	24415	1712.75		2308.3	1.34772	1451.12	0.84725	617.231	0.360375		2303.05		5696.77	2.47357	6089.22	2.64398	4236.52	1.83952
osa-miR156l-3p	22	GCTCACTTCTCTTTCTGTCAGC	23595.6	1632.47		2215.92	1.3574	1419.61	0.86961	599.326	0.367128		2160.8		5493.27	2.54224	5946.28	2.75189	4127.92	1.91037
osa-miR156g-3p	22	GCTCACTTCTCTCTCTGTCAGC	16907.7	1149.2		1985.22	1.72749	983.775	0.856053	490.92	0.427185		1376.72		3294.3	2.39287	4050.88	2.94242	3576.66	2.59796
osa-miR156c-3p	22	GCTCACTTCTCTCTCTGTCAGC	16887.8	1148.27		1982.99	1.72694	981.823	0.855047	489.292	0.426113		1374.77		3292.52	2.39496	4046.14	2.94315	3572.03	2.59828
osa-miR169a	21	CAGCCAAGGATGACTTGCCGA	16309.8	1075.21		1395.68	1.29806	2056.22	1.9124	3059.46	2.84546		764.599		2202.22	2.88023	2909.96	3.80586	2846.42	3.72277
osa-miR1432-5p	21	ATCAGGAGAGATGACACCGAC	10370.6	361.117		698.097	1.93316	953.381	2.64009	954.494	2.64317		626.002		2309.49	3.68927	2565.1	4.0976	1902.89	3.03976
osa-miR169j	21	TAGCCAAGGATGACTTGCCTG	5659.94	304.809		322.556	1.05822	675.369	2.21572	481.479	1.57961		400.446		1158.4	2.89278	1236.75	3.08842	1080.13	2.69732
osa-miR169i-5p.1	21	TAGCCAAGGATGACTTGCCTG	5659.94	304.809		322.556	1.05822	675.369	2.21572	481.479	1.57961		400.446		1158.4	2.89278	1236.75	3.08842	1080.13	2.69732
osa-miR169h	21	TAGCCAAGGATGACTTGCCTG	5659.94	304.809		322.556	1.05822	675.369	2.21572	481.479	1.57961		400.446		1158.4	2.89278	1236.75	3.08842	1080.13	2.69732
osa-miR169l	21	TAGCCAAGGATGACTTGCCTG	5658.64	304.809		322.556	1.05822	675.369	2.21572	481.479	1.57961		399.959		1157.59	2.89427	1236.75	3.09218	1080.13	2.70061
osa-miR169k	21	TAGCCAAGGATGACTTGCCTG	5658.64	304.809		322.556	1.05822	675.369	2.21572	481.479	1.57961		399.959		1157.59	2.89427	1236.75	3.09218	1080.13	2.70061
osa-miR169m	21	TAGCCAAGGATGACTTGCCTG	5625.41	299.69		320.32	1.06884	669.792	2.23495	477.247	1.59247		397.036		1155.15	2.90944	1230.43	3.09903	1075.75	2.70945
osa-miR535-5p	21	TGACAACGAGAGAGAGCACGC	5250.69	668.252		1060.05	1.5863	441.974	0.661387	571.004	0.854473		278.656		575.219	2.06426	746.576	2.6792	908.957	3.26193
osa-miR810b.1	21	TGAACACCGATATGCGTCATC	2836.54	391.132		277.656	0.709878	255.146	0.652326	127.613	0.326266		281.579		641.86	2.2795	481.22	1.70901	380.335	1.35072
osa-miR156b-3p	21	GCTCACTCTCTATCTGTCAGC	1546.37	553.542		254.432	0.459644	214.992	0.388393	79.4327	0.143499		35.0756		144.983	4.13345	165.057	4.70576	98.8579	2.81842
osa-miR156j-3p	22	GCTCGCTCCTCTTTCTGTCAGC	1807.27	290.848		584.902	2.01102	299.483	1.02969	190.118	0.653666		51.3955		123.203	2.39716	145.577	2.83249	121.746	2.36881
osa-miR167h-3p	21	AGGTCATGCTGTAGTTTCATC	1550.56	209.876		272.667	1.29918	102.337	0.487608	79.1071	0.376923		114.483		352.706	3.08086	283.52	2.47653	135.869	1.1868
osa-miR1320-3p	21	TGTAAAATTCATTCGTTCCAA	2034.77	99.819		205.06	2.05431	232.001	2.32422	167.655	1.67959		78.6765		245.269	3.11743	420.936	5.35021	585.355	7.44003
osa-miR1876	24	ATAAGTGGGTTTGTGGGCTGGCCC	1470.91	340.176		221.402	0.650847	179.02	0.526258	237.647	0.6986		44.088		180.416	4.09219	153.474	3.48109	114.685	2.60127
osa-miR1878	24	ACTTAATCTGGACACTATAAAAGA	865.397	159.85		159.3	0.996557	74.7312	0.467508	40.0419	0.250497		49.2032		125.966	2.56013	115.567	2.34876	140.738	2.86035
osa-miR1857-3p	21	TCATGCTCCAAGAAAACCAGG	1089.12	102.611		253.056	2.46616	111.26	1.08429	88.5479	0.862946		79.8944		170.339	2.13205	158.739	1.98687	124.668	1.56041
osa-miR167e-3p	21	AGATCATGTTGCAGCTTCACT	678.341	84.4623		77.2414	0.914507	43.5003	0.515026	22.137	0.262093		28.2553		157.336	5.56837	149.262	5.28264	116.146	4.11058
osa-miR167i-3p	21	AGATCATGTTGCAGCTTCACT	678.341	84.4623		77.2414	0.914507	43.5003	0.515026	22.137	0.262093		28.2553		157.336	5.56837	149.262	5.28264	116.146	4.11058
osa-miR396e-3p	24	ATGGTTCAAGAAAGCCCATGGAAA	703.84	94.9328		39.7389	0.4186	25.654	0.270233	30.2756	0.318916		34.832		171.314	4.9183	166.11	4.7689	140.982	4.04749
osa-miR812h	24	AAGACGGATGATTAAAGTTGGACA	567.869	2.7921		2.0644	0.739372	1.9519	0.69908	2.2788	0.81616		57.9721		177.166	3.05605	179.01	3.08786	144.634	2.4949
osa-miR812j	24	AAGACGGATGATTAAAGTTGGACA	567.869	2.7921		2.0644	0.739372	1.9519	0.69908	2.2788	0.81616		57.9721		177.166	3.05605	179.01	3.08786	144.634	2.4949
osa-miR812i	24	AAGACGGATGATTAAAGTTGGACA	567.869	2.7921		2.0644	0.739372	1.9519	0.69908	2.2788	0.81616		57.9721		177.166	3.05605	179.01	3.08786	144.634	2.4949
osa-miR1873	24	TCAACATGGTATCAGAGCTGGAAG	484.733	69.5708		46.7921	0.672582	41.5483	0.597209	39.3908	0.566197		34.5884		83.5441	2.41538	95.0331	2.74754	74.2651	2.14711
osa-miR1320-5p	21	TGGAACGGAGGAATTTTATAG	651.35	21.4064		116.464	5.44063	93.9717	4.38989	65.4343	3.05676		25.8195		107.275	4.15479	125.043	4.84299	95.9359	3.71564
osa-miR2864.1	21	TTTTGCTGCCCTTGTTTTGCA	426.124	47.4664		58.8342	1.23949	35.9714	0.757829	22.137	0.466372		31.1783		88.5828	2.84117	81.0808	2.60055	60.8731	1.95242
osa-miR390-5p	21	AAGCTCAGGAGGGATAGCGCC	344.922	58.8676		51.0929	0.867929	29.8367	0.506844	36.7864	0.624901		22.1658		46.1606	2.08251	51.0704	2.30402	48.9419	2.20799
osa-miR1856	21	TATGCGTAAGACGGATTCGTA	469.003	45.605		30.1052	0.660129	19.2405	0.421895	23.7647	0.521099		41.1651		92.6462	2.2506	94.2433	2.2894	122.233	2.96934
osa-miR396c-3p	21	GGTCAAGAAAGCTGTGGGAAG	324.624	64.4519		28.557	0.443075	23.4232	0.363421	36.1354	0.560657		12.9098		59.9762	4.64579	56.0721	4.34337	43.0981	3.3384
osa-miR812g	24	AAGACGGATGATTAAAGTTGGACA	337.796	2.3268		2.0644	0.887227	1.9519	0.838877	2.2788	0.979371		31.4219		104.999	3.34159	105.826	3.36792	86.9267	2.76644
osa-miR1846d-5p	22	TCCCACCGAGCAGCCGGATCTC	196.37	32.1096		23.052	0.717916	15.3366	0.477633	15.6261	0.486649		13.6405		27.3063	2.00185	37.6447	2.75977	31.654	2.32059
osa-miR156l-5p	21	CGACAGAAGAGAGTGAGCATA	244.009	70.5015		47.1362	0.668584	25.0963	0.355968	39.0652	0.554105		5.6023		23.893	4.26486	17.3745	3.10132	15.34	2.73816
osa-miR5814	24	AATCAAGTTAGGAACCATGCAAGT	231.418	26.758		40.7711	1.5237	24.8175	0.92748	12.6962	0.474482		15.8327		33.8077	2.13531	32.9062	2.07837	43.8286	2.76823
osa-miR3981-3p	21	AGTATTAGGATACGTCTCATC	207.469	17.2182		17.7191	1.02909	21.4713	1.24701	9.4408	0.548304		22.8966		47.2983	2.06573	40.0139	1.74759	31.4105	1.37184
osa-miR1860-5p	21	AGAAAACCAGCTTCCAGATCT	137.45	18.3816		28.3849	1.5442	12.827	0.697817	11.7196	0.637572		7.551		21.9425	2.90591	21.06	2.78903	15.5835	2.06377
osa-miR166g-5p	21	AATGGAGGCTGATCCAAGATC	121.568	14.4261		8.2574	0.572393	8.3654	0.57988	8.4641	0.586721		10.2304		23.2428	2.27193	27.6412	2.70187	20.9403	2.04687
osa-miR2275d	22	CTTGTTTTTCTCCAATATCTCA	133.61	12.0993		33.3738	2.75832	15.6155	1.29061	8.1386	0.67265		7.551		15.2785	2.02337	21.5865	2.85876	19.9664	2.64421
osa-miR2863a	21	TTGTCCCATTCTAGTTTAGCT	128.191	16.2875		30.1052	1.84836	15.6155	0.958741	7.813	0.479693		7.7946		20.4797	2.62742	18.1642	2.33036	11.9311	1.53069
osa-miR1868	24	TCACGGAAAACGAGGGAGCAGCCA	104.471	18.1489		14.1064	0.777259	5.2981	0.291924	11.394	0.627807		5.8459		16.9039	2.89158	18.1642	3.10717	14.6095	2.4991
miR5139-x	18	AACCTGGCTCTGATACCA	5734.56	923.268		503.531	0.54538	874.467	0.947143	234.392	0.253872		635.258		1290.38	2.03128	532.554	0.838327	740.703	1.16599
miR8155-y	18	AACCTGGCTCTGATACCA	5134.22	856.256		426.634	0.498255	776.033	0.90631	183.932	0.21481		568.029		1239.02	2.18126	448.314	0.789244	636.002	1.11966
miR894-x	19	TTTCACGTCGGGTTCACCA	5677.35	1014.71		626.877	0.617789	663.658	0.654037	235.368	0.231956		513.955		1435.85	2.79374	537.292	1.04541	649.637	1.264
miR1511-y	18	AACCTGGCTCTGATACCA	2482.8	510.496		200.587	0.392925	450.897	0.883252	103.523	0.202789		270.618		593.261	2.19225	154.001	0.569072	199.42	0.736907
miR168-y	21	CTTGCCTTGCACCAAGTGAAT	955.309	86.789		129.194	1.4886	101.501	1.16951	157.238	1.81172		74.7792		154.41	2.06488	144.261	1.92916	107.137	1.43271
miR156-y	23	GCTCACTGCTCTGTCTGTCATCC	351.231	29.5502		44.3837	1.50198	23.1444	0.783223	5.2087	0.176266		24.358		78.9931	3.243	87.3988	3.58809	58.1946	2.38914
miR5168-y	21	TCGGATTAGGCTTCAATCCCT	298.399	55.6101		36.2983	0.652729	17.8463	0.320918	11.0685	0.199038		21.4351		53.3122	2.48714	52.9131	2.46853	49.9159	2.3287
miR1130-y	24	CTCTTATATTATGGGACAGAGGGA	121.342	35.8325		9.1176	0.254451	4.7404	0.132293	3.2554	0.0908505		6.5767		19.0169	2.89156	15.5317	2.36163	27.2711	4.14662
miR156-x	22	CTTGACAGAAGAGAGTGAGCAC	166.308	20.243		19.2673	0.951801	12.2693	0.606101	9.7663	0.482453		4.8716		37.3836	7.67378	34.7489	7.13295	27.7581	5.69794
miR1862-y	24	ACTAGGTTTGTTTATTTTGGGAAA	108.178	20.243		22.5359	1.11327	8.9231	0.440799	9.7663	0.482453		6.0895		15.441	2.53568	11.0565	1.81567	14.1226	2.31917
miR6300-y	18	GTCGTTGTAGTATAGTGA	191.941	22.1044		11.526	0.521435	77.5197	3.50698	40.693	1.84095		6.5767		32.5074	4.94281	0.5265	0.0800553	0.487	0.0740493
novel-m0644-5p	21	TTAAATGGAGAGAACGAAAGA	6112.66	1336.27		837.269	0.626571	842.957	0.630827	1761.19	1.31799		145.905		374.486	2.56665	419.883	2.87779	394.701	2.7052
novel-m0113-3p	20	TAGAGAGGGAGGGCAGAGGA	644.631	89.1158		35.0941	0.393803	36.8079	0.413035	128.59	1.44295		30.4475		106.137	3.4859	126.886	4.16738	91.5531	3.00692
novel-m0644-3p	21	TTTCGTTCTCTCCCTTTAACA	403.088	101.448		125.582	1.2379	92.8563	0.915311	43.6229	0.430003		3.1665		12.3528	3.90109	12.3727	3.90737	11.6876	3.69102
novel-m0351-5p	21	TTTCTTAACTCGGTATCGATT	163.903	23.9659		23.052	0.961867	17.0097	0.709746	13.9984	0.584097		11.2047		27.1437	2.42253	26.5882	2.37295	20.9403	1.86889
novel-m0322-5p	21	TTTCTTAACTCGGTATCGATT	163.903	23.9659		23.052	0.961867	17.0097	0.709746	13.9984	0.584097		11.2047		27.1437	2.42253	26.5882	2.37295	20.9403	1.86889
novel-m0614-3p	21	ACTCGCTGGATTGATCCCAAA	224.344	0.01		0.01	1	0.01	1	0.01	1		31.1783		63.5521	2.03834	52.3866	1.68023	77.187	2.47566
novel-m0236-5p	21	CTGCACGTCATCAAGCGAGAA	106.282	11.4012		18.2352	1.59941	10.5962	0.929393	1.3022	0.114216		8.0382		22.1051	2.75001	26.3249	3.27497	8.2787	1.02992
																in total：73
																		jn10h≥2
osa-miR156d	20	TGACAGAAGAGAGTGAGCAC	155508	22044.2		20478.3	0.928965	11661.1	0.528989	15438.9	0.700362		6913.79		26907.2	3.89182	27354.8	3.95656	24710.1	3.57403
osa-miR156f-5p	20	TGACAGAAGAGAGTGAGCAC	155133	22008.3		20431.5	0.928351	11631	0.528482	15407	0.700053		6894.54		26836	3.89236	27291.6	3.95844	24632.6	3.57277
osa-miR156j-5p	20	TGACAGAAGAGAGTGAGCAC	155133	22008.3		20431.5	0.928351	11631	0.528482	15407	0.700053		6894.54		26836	3.89236	27291.6	3.95844	24632.6	3.57277
osa-miR156h-5p	20	TGACAGAAGAGAGTGAGCAC	155133	22008.3		20431.5	0.928351	11631	0.528482	15407	0.700053		6894.54		26836	3.89236	27291.6	3.95844	24632.6	3.57277
osa-miR168a-3p	24	GATCCCGCCTTGCACCAAGTGAAT	137505	13133.8		20946.4	1.59485	14498.4	1.1039	26348.2	2.00614		8063.73		18788.3	2.32998	18225	2.26012	17501	2.17034
osa-miR5794	21	TGAGGAATCACTAGTAGTCGT	91177	14338.1		13275.9	0.925916	9091.83	0.634103	11122.5	0.775732		6349.65		12544.5	1.97561	13047.2	2.05478	11407.4	1.79653
osa-miR156b-5p	20	TGACAGAAGAGAGTGAGCAC	57709.9	8706.59		7388.85	0.848651	4352.81	0.499945	5933.03	0.681442		2676.7		10221	3.8185	10239.6	3.82546	8191.32	3.06023
osa-miR156c-5p	20	TGACAGAAGAGAGTGAGCAC	57704.1	8706.59		7387.99	0.848552	4351.7	0.499817	5933.03	0.681442		2676.7		10220.2	3.81819	10237.8	3.82477	8190.11	3.05977
osa-miR156g-5p	20	TGACAGAAGAGAGTGAGCAC	57704.1	8706.59		7387.99	0.848552	4351.7	0.499817	5933.03	0.681442		2676.7		10220.2	3.81819	10237.8	3.82477	8190.11	3.05977
osa-miR156a	20	TGACAGAAGAGAGTGAGCAC	57422.3	8658.43		7357.37	0.849736	4331.06	0.500214	5903.41	0.681811		2661.85		10171.1	3.82107	10190.4	3.82832	8148.71	3.0613
osa-miR156i	20	TGACAGAAGAGAGTGAGCAC	57422.3	8658.43		7357.37	0.849736	4331.06	0.500214	5903.41	0.681811		2661.85		10171.1	3.82107	10190.4	3.82832	8148.71	3.0613
osa-miR156e	20	TGACAGAAGAGAGTGAGCAC	57422.3	8658.43		7357.37	0.849736	4331.06	0.500214	5903.41	0.681811		2661.85		10171.1	3.82107	10190.4	3.82832	8148.71	3.0613
osa-miR156h-3p	22	GCTCACTTCTCTTTCTGTCAGC	24415	1712.75		2308.3	1.34772	1451.12	0.84725	617.231	0.360375		2303.05		5696.77	2.47357	6089.22	2.64398	4236.52	1.83952
osa-miR156f-3p	22	GCTCACTTCTCTTTCTGTCAGC	24415	1712.75		2308.3	1.34772	1451.12	0.84725	617.231	0.360375		2303.05		5696.77	2.47357	6089.22	2.64398	4236.52	1.83952
osa-miR156l-3p	22	GCTCACTTCTCTTTCTGTCAGC	23595.6	1632.47		2215.92	1.3574	1419.61	0.86961	599.326	0.367128		2160.8		5493.27	2.54224	5946.28	2.75189	4127.92	1.91037
osa-miR156g-3p	22	GCTCACTTCTCTCTCTGTCAGC	16907.7	1149.2		1985.22	1.72749	983.775	0.856053	490.92	0.427185		1376.72		3294.3	2.39287	4050.88	2.94242	3576.66	2.59796
osa-miR156c-3p	22	GCTCACTTCTCTCTCTGTCAGC	16887.8	1148.27		1982.99	1.72694	981.823	0.855047	489.292	0.426113		1374.77		3292.52	2.39496	4046.14	2.94315	3572.03	2.59828
osa-miR169i-5p.2	22	TGGTGATAAGGGTGTAGCTCTG	11523	891.856		772.242	0.865882	2567.91	2.87929	2516.13	2.82123		649.385		736.781	1.13458	1765.09	2.71809	1623.61	2.50022
osa-miR169a	21	CAGCCAAGGATGACTTGCCGA	16309.8	1075.21		1395.68	1.29806	2056.22	1.9124	3059.46	2.84546		764.599		2202.22	2.88023	2909.96	3.80586	2846.42	3.72277
osa-miR1432-5p	21	ATCAGGAGAGATGACACCGAC	10370.6	361.117		698.097	1.93316	953.381	2.64009	954.494	2.64317		626.002		2309.49	3.68927	2565.1	4.0976	1902.89	3.03976
osa-miR169j	21	TAGCCAAGGATGACTTGCCTG	5659.94	304.809		322.556	1.05822	675.369	2.21572	481.479	1.57961		400.446		1158.4	2.89278	1236.75	3.08842	1080.13	2.69732
osa-miR169i-5p.1	21	TAGCCAAGGATGACTTGCCTG	5659.94	304.809		322.556	1.05822	675.369	2.21572	481.479	1.57961		400.446		1158.4	2.89278	1236.75	3.08842	1080.13	2.69732
osa-miR169h	21	TAGCCAAGGATGACTTGCCTG	5659.94	304.809		322.556	1.05822	675.369	2.21572	481.479	1.57961		400.446		1158.4	2.89278	1236.75	3.08842	1080.13	2.69732
osa-miR169l	21	TAGCCAAGGATGACTTGCCTG	5658.64	304.809		322.556	1.05822	675.369	2.21572	481.479	1.57961		399.959		1157.59	2.89427	1236.75	3.09218	1080.13	2.70061
osa-miR169k	21	TAGCCAAGGATGACTTGCCTG	5658.64	304.809		322.556	1.05822	675.369	2.21572	481.479	1.57961		399.959		1157.59	2.89427	1236.75	3.09218	1080.13	2.70061
osa-miR169m	21	TAGCCAAGGATGACTTGCCTG	5625.41	299.69		320.32	1.06884	669.792	2.23495	477.247	1.59247		397.036		1155.15	2.90944	1230.43	3.09903	1075.75	2.70945
osa-miR535-5p	21	TGACAACGAGAGAGAGCACGC	5250.69	668.252		1060.05	1.5863	441.974	0.661387	571.004	0.854473		278.656		575.219	2.06426	746.576	2.6792	908.957	3.26193
osa-miR156b-3p	21	GCTCACTCTCTATCTGTCAGC	1546.37	553.542		254.432	0.459644	214.992	0.388393	79.4327	0.143499		35.0756		144.983	4.13345	165.057	4.70576	98.8579	2.81842
osa-miR169g	21	TAGCCAAGGATGACTTGCCTA	2812.34	259.204		207.64	0.801069	360.55	1.39099	260.435	1.00475		259.413		441.126	1.70048	546.243	2.10569	477.732	1.84159
osa-miR169f.1	21	TAGCCAAGGATGACTTGCCTA	2810.28	259.204		207.64	0.801069	359.993	1.38884	260.435	1.00475		259.9		440.313	1.69416	546.769	2.10377	476.027	1.83158
osa-miR156j-3p	22	GCTCGCTCCTCTTTCTGTCAGC	1807.27	290.848		584.902	2.01102	299.483	1.02969	190.118	0.653666		51.3955		123.203	2.39716	145.577	2.83249	121.746	2.36881
osa-miR167h-3p	21	AGGTCATGCTGTAGTTTCATC	1550.56	209.876		272.667	1.29918	102.337	0.487608	79.1071	0.376923		114.483		352.706	3.08086	283.52	2.47653	135.869	1.1868
osa-miR1320-3p	21	TGTAAAATTCATTCGTTCCAA	2034.77	99.819		205.06	2.05431	232.001	2.32422	167.655	1.67959		78.6765		245.269	3.11743	420.936	5.35021	585.355	7.44003
osa-miR1876	24	ATAAGTGGGTTTGTGGGCTGGCCC	1470.91	340.176		221.402	0.650847	179.02	0.526258	237.647	0.6986		44.088		180.416	4.09219	153.474	3.48109	114.685	2.60127
osa-miR1862b	24	ACGAGGTTGGTTTATTTTGGGACG	1265	230.817		233.617	1.01213	73.8947	0.320144	102.221	0.442865		77.4586		152.46	1.96828	202.176	2.61011	192.359	2.48338
osa-miR1862c	24	ACGAGGTTGGTTTATTTTGGGACG	1265	230.817		233.617	1.01213	73.8947	0.320144	102.221	0.442865		77.4586		152.46	1.96828	202.176	2.61011	192.359	2.48338
osa-miR1862a	24	ACGAGGTTGGTTTATTTTGGGACG	1265	230.817		233.617	1.01213	73.8947	0.320144	102.221	0.442865		77.4586		152.46	1.96828	202.176	2.61011	192.359	2.48338
osa-miR1878	24	ACTTAATCTGGACACTATAAAAGA	865.397	159.85		159.3	0.996557	74.7312	0.467508	40.0419	0.250497		49.2032		125.966	2.56013	115.567	2.34876	140.738	2.86035
osa-miR1882b	24	AGATTGCTTTCAAGGTCATTTCTT	993.333	0.01		0.01	1	0.01	1	0.9766	97.66		141.52		259.735	1.83532	313.004	2.21172	278.068	1.96487
osa-miR1882f	24	AGATTGCTTTCAAGGTCATTTCTT	993.333	0.01		0.01	1	0.01	1	0.9766	97.66		141.52		259.735	1.83532	313.004	2.21172	278.068	1.96487
osa-miR1882a	24	AGATTGCTTTCAAGGTCATTTCTT	993.333	0.01		0.01	1	0.01	1	0.9766	97.66		141.52		259.735	1.83532	313.004	2.21172	278.068	1.96487
osa-miR1882d	24	AGATTGCTTTCAAGGTCATTTCTT	993.333	0.01		0.01	1	0.01	1	0.9766	97.66		141.52		259.735	1.83532	313.004	2.21172	278.068	1.96487
osa-miR1882e-5p	24	AGATTGCTTTCAAGGTCATTTCTT	993.333	0.01		0.01	1	0.01	1	0.9766	97.66		141.52		259.735	1.83532	313.004	2.21172	278.068	1.96487
osa-miR1882c	24	AGATTGCTTTCAAGGTCATTTCTT	993.333	0.01		0.01	1	0.01	1	0.9766	97.66		141.52		259.735	1.83532	313.004	2.21172	278.068	1.96487
osa-miR1882g	24	AGATTGCTTTCAAGGTCATTTCTT	993.333	0.01		0.01	1	0.01	1	0.9766	97.66		141.52		259.735	1.83532	313.004	2.21172	278.068	1.96487
osa-miR1882h	24	AGATTGCTTTCAAGGTCATTTCTT	883.379	0.01		0.01	1	0.01	1	0.9766	97.66		129.098		236.654	1.83314	274.832	2.12887	241.788	1.87291
osa-miR167e-3p	21	AGATCATGTTGCAGCTTCACT	678.341	84.4623		77.2414	0.914507	43.5003	0.515026	22.137	0.262093		28.2553		157.336	5.56837	149.262	5.28264	116.146	4.11058
osa-miR167i-3p	21	AGATCATGTTGCAGCTTCACT	678.341	84.4623		77.2414	0.914507	43.5003	0.515026	22.137	0.262093		28.2553		157.336	5.56837	149.262	5.28264	116.146	4.11058
osa-miR396e-3p	24	ATGGTTCAAGAAAGCCCATGGAAA	703.84	94.9328		39.7389	0.4186	25.654	0.270233	30.2756	0.318916		34.832		171.314	4.9183	166.11	4.7689	140.982	4.04749
osa-miR812h	24	AAGACGGATGATTAAAGTTGGACA	567.869	2.7921		2.0644	0.739372	1.9519	0.69908	2.2788	0.81616		57.9721		177.166	3.05605	179.01	3.08786	144.634	2.4949
osa-miR812j	24	AAGACGGATGATTAAAGTTGGACA	567.869	2.7921		2.0644	0.739372	1.9519	0.69908	2.2788	0.81616		57.9721		177.166	3.05605	179.01	3.08786	144.634	2.4949
osa-miR812i	24	AAGACGGATGATTAAAGTTGGACA	567.869	2.7921		2.0644	0.739372	1.9519	0.69908	2.2788	0.81616		57.9721		177.166	3.05605	179.01	3.08786	144.634	2.4949
osa-miR1873	24	TCAACATGGTATCAGAGCTGGAAG	484.733	69.5708		46.7921	0.672582	41.5483	0.597209	39.3908	0.566197		34.5884		83.5441	2.41538	95.0331	2.74754	74.2651	2.14711
osa-miR1320-5p	21	TGGAACGGAGGAATTTTATAG	651.35	21.4064		116.464	5.44063	93.9717	4.38989	65.4343	3.05676		25.8195		107.275	4.15479	125.043	4.84299	95.9359	3.71564
osa-miR2864.1	21	TTTTGCTGCCCTTGTTTTGCA	426.124	47.4664		58.8342	1.23949	35.9714	0.757829	22.137	0.466372		31.1783		88.5828	2.84117	81.0808	2.60055	60.8731	1.95242
osa-miR390-5p	21	AAGCTCAGGAGGGATAGCGCC	344.922	58.8676		51.0929	0.867929	29.8367	0.506844	36.7864	0.624901		22.1658		46.1606	2.08251	51.0704	2.30402	48.9419	2.20799
osa-miR1856	21	TATGCGTAAGACGGATTCGTA	469.003	45.605		30.1052	0.660129	19.2405	0.421895	23.7647	0.521099		41.1651		92.6462	2.2506	94.2433	2.2894	122.233	2.96934
osa-miR396c-3p	21	GGTCAAGAAAGCTGTGGGAAG	324.624	64.4519		28.557	0.443075	23.4232	0.363421	36.1354	0.560657		12.9098		59.9762	4.64579	56.0721	4.34337	43.0981	3.3384
osa-miR812g	24	AAGACGGATGATTAAAGTTGGACA	337.796	2.3268		2.0644	0.887227	1.9519	0.838877	2.2788	0.979371		31.4219		104.999	3.34159	105.826	3.36792	86.9267	2.76644
osa-miR1846d-5p	22	TCCCACCGAGCAGCCGGATCTC	196.37	32.1096		23.052	0.717916	15.3366	0.477633	15.6261	0.486649		13.6405		27.3063	2.00185	37.6447	2.75977	31.654	2.32059
osa-miR156l-5p	21	CGACAGAAGAGAGTGAGCATA	244.009	70.5015		47.1362	0.668584	25.0963	0.355968	39.0652	0.554105		5.6023		23.893	4.26486	17.3745	3.10132	15.34	2.73816
osa-miR5814	24	AATCAAGTTAGGAACCATGCAAGT	231.418	26.758		40.7711	1.5237	24.8175	0.92748	12.6962	0.474482		15.8327		33.8077	2.13531	32.9062	2.07837	43.8286	2.76823
osa-miR1860-5p	21	AGAAAACCAGCTTCCAGATCT	137.45	18.3816		28.3849	1.5442	12.827	0.697817	11.7196	0.637572		7.551		21.9425	2.90591	21.06	2.78903	15.5835	2.06377
osa-miR166g-5p	21	AATGGAGGCTGATCCAAGATC	121.568	14.4261		8.2574	0.572393	8.3654	0.57988	8.4641	0.586721		10.2304		23.2428	2.27193	27.6412	2.70187	20.9403	2.04687
osa-miR2275d	22	CTTGTTTTTCTCCAATATCTCA	133.61	12.0993		33.3738	2.75832	15.6155	1.29061	8.1386	0.67265		7.551		15.2785	2.02337	21.5865	2.85876	19.9664	2.64421
osa-miR2863a	21	TTGTCCCATTCTAGTTTAGCT	128.191	16.2875		30.1052	1.84836	15.6155	0.958741	7.813	0.479693		7.7946		20.4797	2.62742	18.1642	2.33036	11.9311	1.53069
osa-miR1868	24	TCACGGAAAACGAGGGAGCAGCCA	104.471	18.1489		14.1064	0.777259	5.2981	0.291924	11.394	0.627807		5.8459		16.9039	2.89158	18.1642	3.10717	14.6095	2.4991
miR169-x	24	TGGTGATAAGGGTGTAGCTCTGGA	1751.44	185.445		121.453	0.654929	322.348	1.73824	314.475	1.69579		107.906		166.601	1.54394	288.258	2.67138	244.953	2.27006
miR160-x	21	TGCCTGGCTCCCTGTATGCTT	287.762	44.2089		57.63	1.30358	39.0387	0.883051	23.7647	0.537555		20.4608		40.3092	1.97007	42.3832	2.07143	19.9664	0.975837
miR156-y	23	GCTCACTGCTCTGTCTGTCATCC	351.231	29.5502		44.3837	1.50198	23.1444	0.783223	5.2087	0.176266		24.358		78.9931	3.243	87.3988	3.58809	58.1946	2.38914
miR5168-y	21	TCGGATTAGGCTTCAATCCCT	298.399	55.6101		36.2983	0.652729	17.8463	0.320918	11.0685	0.199038		21.4351		53.3122	2.48714	52.9131	2.46853	49.9159	2.3287
miR1130-y	24	CTCTTATATTATGGGACAGAGGGA	121.342	35.8325		9.1176	0.254451	4.7404	0.132293	3.2554	0.0908505		6.5767		19.0169	2.89156	15.5317	2.36163	27.2711	4.14662
miR156-x	22	CTTGACAGAAGAGAGTGAGCAC	166.308	20.243		19.2673	0.951801	12.2693	0.606101	9.7663	0.482453		4.8716		37.3836	7.67378	34.7489	7.13295	27.7581	5.69794
novel-m0644-5p	21	TTAAATGGAGAGAACGAAAGA	6112.66	1336.27		837.269	0.626571	842.957	0.630827	1761.19	1.31799		145.905		374.486	2.56665	419.883	2.87779	394.701	2.7052
novel-m0113-3p	20	TAGAGAGGGAGGGCAGAGGA	644.631	89.1158		35.0941	0.393803	36.8079	0.413035	128.59	1.44295		30.4475		106.137	3.4859	126.886	4.16738	91.5531	3.00692
novel-m0644-3p	21	TTTCGTTCTCTCCCTTTAACA	403.088	101.448		125.582	1.2379	92.8563	0.915311	43.6229	0.430003		3.1665		12.3528	3.90109	12.3727	3.90737	11.6876	3.69102
novel-m0351-5p	21	TTTCTTAACTCGGTATCGATT	163.903	23.9659		23.052	0.961867	17.0097	0.709746	13.9984	0.584097		11.2047		27.1437	2.42253	26.5882	2.37295	20.9403	1.86889
novel-m0322-5p	21	TTTCTTAACTCGGTATCGATT	163.903	23.9659		23.052	0.961867	17.0097	0.709746	13.9984	0.584097		11.2047		27.1437	2.42253	26.5882	2.37295	20.9403	1.86889
novel-m0236-5p	21	CTGCACGTCATCAAGCGAGAA	106.282	11.4012		18.2352	1.59941	10.5962	0.929393	1.3022	0.114216		8.0382		22.1051	2.75001	26.3249	3.27497	8.2787	1.02992
																		in total：79
																				jn22h≥2
osa-miR156d	20	TGACAGAAGAGAGTGAGCAC	155508	22044.2		20478.3	0.928965	11661.1	0.528989	15438.9	0.700362		6913.79		26907.2	3.89182	27354.8	3.95656	24710.1	3.57403
osa-miR156f-5p	20	TGACAGAAGAGAGTGAGCAC	155133	22008.3		20431.5	0.928351	11631	0.528482	15407	0.700053		6894.54		26836	3.89236	27291.6	3.95844	24632.6	3.57277
osa-miR156j-5p	20	TGACAGAAGAGAGTGAGCAC	155133	22008.3		20431.5	0.928351	11631	0.528482	15407	0.700053		6894.54		26836	3.89236	27291.6	3.95844	24632.6	3.57277
osa-miR156h-5p	20	TGACAGAAGAGAGTGAGCAC	155133	22008.3		20431.5	0.928351	11631	0.528482	15407	0.700053		6894.54		26836	3.89236	27291.6	3.95844	24632.6	3.57277
osa-miR168a-3p	24	GATCCCGCCTTGCACCAAGTGAAT	137505	13133.8		20946.4	1.59485	14498.4	1.1039	26348.2	2.00614		8063.73		18788.3	2.32998	18225	2.26012	17501	2.17034
osa-miR156b-5p	20	TGACAGAAGAGAGTGAGCAC	57709.9	8706.59		7388.85	0.848651	4352.81	0.499945	5933.03	0.681442		2676.7		10221	3.8185	10239.6	3.82546	8191.32	3.06023
osa-miR156c-5p	20	TGACAGAAGAGAGTGAGCAC	57704.1	8706.59		7387.99	0.848552	4351.7	0.499817	5933.03	0.681442		2676.7		10220.2	3.81819	10237.8	3.82477	8190.11	3.05977
osa-miR156g-5p	20	TGACAGAAGAGAGTGAGCAC	57704.1	8706.59		7387.99	0.848552	4351.7	0.499817	5933.03	0.681442		2676.7		10220.2	3.81819	10237.8	3.82477	8190.11	3.05977
osa-miR156a	20	TGACAGAAGAGAGTGAGCAC	57422.3	8658.43		7357.37	0.849736	4331.06	0.500214	5903.41	0.681811		2661.85		10171.1	3.82107	10190.4	3.82832	8148.71	3.0613
osa-miR156i	20	TGACAGAAGAGAGTGAGCAC	57422.3	8658.43		7357.37	0.849736	4331.06	0.500214	5903.41	0.681811		2661.85		10171.1	3.82107	10190.4	3.82832	8148.71	3.0613
osa-miR156e	20	TGACAGAAGAGAGTGAGCAC	57422.3	8658.43		7357.37	0.849736	4331.06	0.500214	5903.41	0.681811		2661.85		10171.1	3.82107	10190.4	3.82832	8148.71	3.0613
osa-miR156g-3p	22	GCTCACTTCTCTCTCTGTCAGC	16907.7	1149.2		1985.22	1.72749	983.775	0.856053	490.92	0.427185		1376.72		3294.3	2.39287	4050.88	2.94242	3576.66	2.59796
osa-miR156c-3p	22	GCTCACTTCTCTCTCTGTCAGC	16887.8	1148.27		1982.99	1.72694	981.823	0.855047	489.292	0.426113		1374.77		3292.52	2.39496	4046.14	2.94315	3572.03	2.59828
osa-miR169i-5p.2	22	TGGTGATAAGGGTGTAGCTCTG	11523	891.856		772.242	0.865882	2567.91	2.87929	2516.13	2.82123		649.385		736.781	1.13458	1765.09	2.71809	1623.61	2.50022
osa-miR169a	21	CAGCCAAGGATGACTTGCCGA	16309.8	1075.21		1395.68	1.29806	2056.22	1.9124	3059.46	2.84546		764.599		2202.22	2.88023	2909.96	3.80586	2846.42	3.72277
osa-miR1432-5p	21	ATCAGGAGAGATGACACCGAC	10370.6	361.117		698.097	1.93316	953.381	2.64009	954.494	2.64317		626.002		2309.49	3.68927	2565.1	4.0976	1902.89	3.03976
osa-miR169j	21	TAGCCAAGGATGACTTGCCTG	5659.94	304.809		322.556	1.05822	675.369	2.21572	481.479	1.57961		400.446		1158.4	2.89278	1236.75	3.08842	1080.13	2.69732
osa-miR169i-5p.1	21	TAGCCAAGGATGACTTGCCTG	5659.94	304.809		322.556	1.05822	675.369	2.21572	481.479	1.57961		400.446		1158.4	2.89278	1236.75	3.08842	1080.13	2.69732
osa-miR169h	21	TAGCCAAGGATGACTTGCCTG	5659.94	304.809		322.556	1.05822	675.369	2.21572	481.479	1.57961		400.446		1158.4	2.89278	1236.75	3.08842	1080.13	2.69732
osa-miR169l	21	TAGCCAAGGATGACTTGCCTG	5658.64	304.809		322.556	1.05822	675.369	2.21572	481.479	1.57961		399.959		1157.59	2.89427	1236.75	3.09218	1080.13	2.70061
osa-miR169k	21	TAGCCAAGGATGACTTGCCTG	5658.64	304.809		322.556	1.05822	675.369	2.21572	481.479	1.57961		399.959		1157.59	2.89427	1236.75	3.09218	1080.13	2.70061
osa-miR169m	21	TAGCCAAGGATGACTTGCCTG	5625.41	299.69		320.32	1.06884	669.792	2.23495	477.247	1.59247		397.036		1155.15	2.90944	1230.43	3.09903	1075.75	2.70945
osa-miR535-5p	21	TGACAACGAGAGAGAGCACGC	5250.69	668.252		1060.05	1.5863	441.974	0.661387	571.004	0.854473		278.656		575.219	2.06426	746.576	2.6792	908.957	3.26193
osa-miR156b-3p	21	GCTCACTCTCTATCTGTCAGC	1546.37	553.542		254.432	0.459644	214.992	0.388393	79.4327	0.143499		35.0756		144.983	4.13345	165.057	4.70576	98.8579	2.81842
osa-miR156j-3p	22	GCTCGCTCCTCTTTCTGTCAGC	1807.27	290.848		584.902	2.01102	299.483	1.02969	190.118	0.653666		51.3955		123.203	2.39716	145.577	2.83249	121.746	2.36881
osa-miR1320-3p	21	TGTAAAATTCATTCGTTCCAA	2034.77	99.819		205.06	2.05431	232.001	2.32422	167.655	1.67959		78.6765		245.269	3.11743	420.936	5.35021	585.355	7.44003
osa-miR1876	24	ATAAGTGGGTTTGTGGGCTGGCCC	1470.91	340.176		221.402	0.650847	179.02	0.526258	237.647	0.6986		44.088		180.416	4.09219	153.474	3.48109	114.685	2.60127
osa-miR1862b	24	ACGAGGTTGGTTTATTTTGGGACG	1265	230.817		233.617	1.01213	73.8947	0.320144	102.221	0.442865		77.4586		152.46	1.96828	202.176	2.61011	192.359	2.48338
osa-miR1862c	24	ACGAGGTTGGTTTATTTTGGGACG	1265	230.817		233.617	1.01213	73.8947	0.320144	102.221	0.442865		77.4586		152.46	1.96828	202.176	2.61011	192.359	2.48338
osa-miR1862a	24	ACGAGGTTGGTTTATTTTGGGACG	1265	230.817		233.617	1.01213	73.8947	0.320144	102.221	0.442865		77.4586		152.46	1.96828	202.176	2.61011	192.359	2.48338
osa-miR3980a-5p	21	AATCGACGGCCTCAGTCAGGG	1517.13	131.231		380.874	2.90233	661.706	5.04231	342.798	2.61218		0.01		0.01	1	0.01	1	0.487	48.7
osa-miR3980b-5p	21	AATCGACGGCCTCAGTCAGGG	1517.13	131.231		380.874	2.90233	661.706	5.04231	342.798	2.61218		0.01		0.01	1	0.01	1	0.487	48.7
osa-miR1878	24	ACTTAATCTGGACACTATAAAAGA	865.397	159.85		159.3	0.996557	74.7312	0.467508	40.0419	0.250497		49.2032		125.966	2.56013	115.567	2.34876	140.738	2.86035
osa-miR1860-3p	22	ATCTGGAAGCTAGGTTTTCTCT	650.425	100.517		94.6164	0.941297	76.4043	0.760112	71.9452	0.715751		46.0367		85.4946	1.8571	82.3971	1.78981	93.014	2.02043
osa-miR167e-3p	21	AGATCATGTTGCAGCTTCACT	678.341	84.4623		77.2414	0.914507	43.5003	0.515026	22.137	0.262093		28.2553		157.336	5.56837	149.262	5.28264	116.146	4.11058
osa-miR167i-3p	21	AGATCATGTTGCAGCTTCACT	678.341	84.4623		77.2414	0.914507	43.5003	0.515026	22.137	0.262093		28.2553		157.336	5.56837	149.262	5.28264	116.146	4.11058
osa-miR396e-3p	24	ATGGTTCAAGAAAGCCCATGGAAA	703.84	94.9328		39.7389	0.4186	25.654	0.270233	30.2756	0.318916		34.832		171.314	4.9183	166.11	4.7689	140.982	4.04749
osa-miR812h	24	AAGACGGATGATTAAAGTTGGACA	567.869	2.7921		2.0644	0.739372	1.9519	0.69908	2.2788	0.81616		57.9721		177.166	3.05605	179.01	3.08786	144.634	2.4949
osa-miR812j	24	AAGACGGATGATTAAAGTTGGACA	567.869	2.7921		2.0644	0.739372	1.9519	0.69908	2.2788	0.81616		57.9721		177.166	3.05605	179.01	3.08786	144.634	2.4949
osa-miR812i	24	AAGACGGATGATTAAAGTTGGACA	567.869	2.7921		2.0644	0.739372	1.9519	0.69908	2.2788	0.81616		57.9721		177.166	3.05605	179.01	3.08786	144.634	2.4949
osa-miR1873	24	TCAACATGGTATCAGAGCTGGAAG	484.733	69.5708		46.7921	0.672582	41.5483	0.597209	39.3908	0.566197		34.5884		83.5441	2.41538	95.0331	2.74754	74.2651	2.14711
osa-miR1320-5p	21	TGGAACGGAGGAATTTTATAG	651.35	21.4064		116.464	5.44063	93.9717	4.38989	65.4343	3.05676		25.8195		107.275	4.15479	125.043	4.84299	95.9359	3.71564
osa-miR390-5p	21	AAGCTCAGGAGGGATAGCGCC	344.922	58.8676		51.0929	0.867929	29.8367	0.506844	36.7864	0.624901		22.1658		46.1606	2.08251	51.0704	2.30402	48.9419	2.20799
osa-miR1856	21	TATGCGTAAGACGGATTCGTA	469.003	45.605		30.1052	0.660129	19.2405	0.421895	23.7647	0.521099		41.1651		92.6462	2.2506	94.2433	2.2894	122.233	2.96934
osa-miR396c-3p	21	GGTCAAGAAAGCTGTGGGAAG	324.624	64.4519		28.557	0.443075	23.4232	0.363421	36.1354	0.560657		12.9098		59.9762	4.64579	56.0721	4.34337	43.0981	3.3384
osa-miR812g	24	AAGACGGATGATTAAAGTTGGACA	337.796	2.3268		2.0644	0.887227	1.9519	0.838877	2.2788	0.979371		31.4219		104.999	3.34159	105.826	3.36792	86.9267	2.76644
osa-miR1846d-5p	22	TCCCACCGAGCAGCCGGATCTC	196.37	32.1096		23.052	0.717916	15.3366	0.477633	15.6261	0.486649		13.6405		27.3063	2.00185	37.6447	2.75977	31.654	2.32059
osa-miR156l-5p	21	CGACAGAAGAGAGTGAGCATA	244.009	70.5015		47.1362	0.668584	25.0963	0.355968	39.0652	0.554105		5.6023		23.893	4.26486	17.3745	3.10132	15.34	2.73816
osa-miR5814	24	AATCAAGTTAGGAACCATGCAAGT	231.418	26.758		40.7711	1.5237	24.8175	0.92748	12.6962	0.474482		15.8327		33.8077	2.13531	32.9062	2.07837	43.8286	2.76823
osa-miR1860-5p	21	AGAAAACCAGCTTCCAGATCT	137.45	18.3816		28.3849	1.5442	12.827	0.697817	11.7196	0.637572		7.551		21.9425	2.90591	21.06	2.78903	15.5835	2.06377
osa-miR166g-5p	21	AATGGAGGCTGATCCAAGATC	121.568	14.4261		8.2574	0.572393	8.3654	0.57988	8.4641	0.586721		10.2304		23.2428	2.27193	27.6412	2.70187	20.9403	2.04687
osa-miR2275d	22	CTTGTTTTTCTCCAATATCTCA	133.61	12.0993		33.3738	2.75832	15.6155	1.29061	8.1386	0.67265		7.551		15.2785	2.02337	21.5865	2.85876	19.9664	2.64421
osa-miR1868	24	TCACGGAAAACGAGGGAGCAGCCA	104.471	18.1489		14.1064	0.777259	5.2981	0.291924	11.394	0.627807		5.8459		16.9039	2.89158	18.1642	3.10717	14.6095	2.4991
miR169-x	24	TGGTGATAAGGGTGTAGCTCTGGA	1751.44	185.445		121.453	0.654929	322.348	1.73824	314.475	1.69579		107.906		166.601	1.54394	288.258	2.67138	244.953	2.27006
miR156-y	23	GCTCACTGCTCTGTCTGTCATCC	351.231	29.5502		44.3837	1.50198	23.1444	0.783223	5.2087	0.176266		24.358		78.9931	3.243	87.3988	3.58809	58.1946	2.38914
miR5168-y	21	TCGGATTAGGCTTCAATCCCT	298.399	55.6101		36.2983	0.652729	17.8463	0.320918	11.0685	0.199038		21.4351		53.3122	2.48714	52.9131	2.46853	49.9159	2.3287
miR1130-y	24	CTCTTATATTATGGGACAGAGGGA	121.342	35.8325		9.1176	0.254451	4.7404	0.132293	3.2554	0.0908505		6.5767		19.0169	2.89156	15.5317	2.36163	27.2711	4.14662
miR156-x	22	CTTGACAGAAGAGAGTGAGCAC	166.308	20.243		19.2673	0.951801	12.2693	0.606101	9.7663	0.482453		4.8716		37.3836	7.67378	34.7489	7.13295	27.7581	5.69794
miR1862-y	24	ACTAGGTTTGTTTATTTTGGGAAA	108.178	20.243		22.5359	1.11327	8.9231	0.440799	9.7663	0.482453		6.0895		15.441	2.53568	11.0565	1.81567	14.1226	2.31917
novel-m0644-5p	21	TTAAATGGAGAGAACGAAAGA	6112.66	1336.27		837.269	0.626571	842.957	0.630827	1761.19	1.31799		145.905		374.486	2.56665	419.883	2.87779	394.701	2.7052
novel-m0113-3p	20	TAGAGAGGGAGGGCAGAGGA	644.631	89.1158		35.0941	0.393803	36.8079	0.413035	128.59	1.44295		30.4475		106.137	3.4859	126.886	4.16738	91.5531	3.00692
novel-m0644-3p	21	TTTCGTTCTCTCCCTTTAACA	403.088	101.448		125.582	1.2379	92.8563	0.915311	43.6229	0.430003		3.1665		12.3528	3.90109	12.3727	3.90737	11.6876	3.69102
novel-m0614-3p	21	ACTCGCTGGATTGATCCCAAA	224.344	0.01		0.01	1	0.01	1	0.01	1		31.1783		63.5521	2.03834	52.3866	1.68023	77.187	2.47566
																				in total：63
							zy3h≤0.5
osa-miR396f-3p	24	ATAGTTCAAGAAAGTCCTTGGAAA	3513.75	543.304		268.367	0.493953	347.723	0.640016	289.083	0.532083		375.357		631.945	1.68358	512.547	1.36549	545.423	1.45308
osa-miR156b-3p	21	GCTCACTCTCTATCTGTCAGC	1546.37	553.542		254.432	0.459644	214.992	0.388393	79.4327	0.143499		35.0756		144.983	4.13345	165.057	4.70576	98.8579	2.81842
osa-miR1883a	24	ACCTGTGACGGGCCGAGAATGGAA	1696.44	381.36		168.933	0.442976	171.213	0.448953	250.669	0.657302		143.469		187.243	1.30511	195.594	1.36332	197.959	1.37981
osa-miR166j-5p	21	GAATGACGTCCGGTCTGAAGA	1154.97	227.327		70.0162	0.307998	58.558	0.257594	91.8033	0.403838		234.081		229.503	0.980442	135.573	0.579174	108.111	0.461852
osa-miR1883b	24	ACCTGTGACGGGCCGAGAATGGAA	898.757	229.886		89.4555	0.389129	55.4907	0.241383	73.8984	0.321456		79.8944		112.313	1.40577	119.515	1.49592	138.304	1.73108
osa-miR396e-3p	24	ATGGTTCAAGAAAGCCCATGGAAA	703.84	94.9328		39.7389	0.4186	25.654	0.270233	30.2756	0.318916		34.832		171.314	4.9183	166.11	4.7689	140.982	4.04749
osa-miR396c-3p	21	GGTCAAGAAAGCTGTGGGAAG	324.624	64.4519		28.557	0.443075	23.4232	0.363421	36.1354	0.560657		12.9098		59.9762	4.64579	56.0721	4.34337	43.0981	3.3384
osa-miR812p	24	GACGGACGATTAAAGTTGGGCATG	393.853	1.1634		0.01	0.0085955	0.01	0.0085955	0.6511	0.559653		66.0103		115.401	1.74823	106.879	1.61913	103.728	1.57139
osa-miR3980a-3p	21	CTGGCCGAGGCCGTCGATTCT	112.248	39.788		17.375	0.436689	27.0482	0.679808	27.9968	0.703649		0.01		0.01	1	0.01	1	0.01	1
osa-miR3980b-3p	21	CTGGCCGAGGCCGTCGATTCT	112.248	39.788		17.375	0.436689	27.0482	0.679808	27.9968	0.703649		0.01		0.01	1	0.01	1	0.01	1
miR8155-y	18	AACCTGGCTCTGATACCA	5134.22	856.256		426.634	0.498255	776.033	0.90631	183.932	0.21481		568.029		1239.02	2.18126	448.314	0.789244	636.002	1.11966
miR1511-y	18	AACCTGGCTCTGATACCA	2482.8	510.496		200.587	0.392925	450.897	0.883252	103.523	0.202789		270.618		593.261	2.19225	154.001	0.569072	199.42	0.736907
miR6478-x	20	CCGACCTTAGCTCAGTTGGA	336.281	33.273		12.3862	0.37226	35.6925	1.07272	132.496	3.9821		35.0756		53.7998	1.53382	22.113	0.630438	11.4441	0.32627
miR1130-y	24	CTCTTATATTATGGGACAGAGGGA	121.342	35.8325		9.1176	0.254451	4.7404	0.132293	3.2554	0.0908505		6.5767		19.0169	2.89156	15.5317	2.36163	27.2711	4.14662
novel-m0342-5p	21	TGAAGAAGGATGTGGACGGTG	863.293	195.217		83.9506	0.430037	63.2984	0.324246	68.0386	0.348528		135.187		138.807	1.02678	95.0331	0.702975	83.7613	0.619595
novel-m0485-3p	22	AACACCGGATTCGAATCTTTTG	3202.99	0.4654		0.01	0.0214869	0.01	0.0214869	1.6277	3.49742		559.504		935.239	1.67155	937.431	1.67547	768.705	1.3739
novel-m0248-5p	21	CCCGCCACCGGCGCCGCTTCC	392.884	100.75		40.427	0.401262	65.5292	0.650416	47.2038	0.468525		55.7799		51.3618	0.920794	21.8497	0.391713	9.9832	0.178975
novel-m0113-3p	20	TAGAGAGGGAGGGCAGAGGA	644.631	89.1158		35.0941	0.393803	36.8079	0.413035	128.59	1.44295		30.4475		106.137	3.4859	126.886	4.16738	91.5531	3.00692
novel-m0612-5p	21	TCGTGCGGCGAGGCTGCGAGA	150.691	31.8769		7.2253	0.226663	12.827	0.402392	10.7429	0.337012		25.8195		25.6809	0.994632	22.6395	0.876837	13.8791	0.537543
novel-m0257-5p	21	CAGATTTGGTCAAGAGGAAGA	431.36	3.4902		1.0322	0.295742	5.8558	1.67778	403.023	115.473		4.3844		7.1516	1.63115	4.4752	1.02071	1.9479	0.44428
							in total：20
									zy10h≤0.5
osa-miR167f	21	TGAAGCTGCCAGCATGATCTG	619519	130227		79923.7	0.613726	48014.5	0.368698	62802.6	0.482255		65130.7		68808.7	1.05647	72940.4	1.11991	91671.4	1.4075
osa-miR167j	21	TGAAGCTGCCAGCATGATCTG	619543	130240		79928.9	0.613705	48013.1	0.368652	62810.1	0.482265		65133.1		68807.7	1.05642	72940.4	1.11987	91669.5	1.40742
osa-miR167d-5p	21	TGAAGCTGCCAGCATGATCTG	619543	130240		79928.9	0.613705	48013.1	0.368652	62810.1	0.482265		65133.1		68807.7	1.05642	72940.4	1.11987	91669.5	1.40742
osa-miR167h-5p	21	TGAAGCTGCCAGCATGATCTG	619427	130215		79911.8	0.613691	48006.2	0.368668	62794.5	0.482236		65122.2		68797.1	1.05643	72927.7	1.11986	91652.7	1.4074
osa-miR167g	21	TGAAGCTGCCAGCATGATCTG	619400	130227		79901.7	0.613557	47990.8	0.368516	62790.2	0.48216		65117.6		68796.5	1.0565	72924.8	1.1199	91651.2	1.40747
osa-miR396c-5p	21	TTCCACAGCTTTCTTGAACTT	85260.7	13621.2		12409.2	0.91102	6469.55	0.474961	3030.81	0.222507		7847.67		14253.9	1.81632	14960.5	1.90636	12667.9	1.61423
osa-miR156b-5p	20	TGACAGAAGAGAGTGAGCAC	57709.9	8706.59		7388.85	0.848651	4352.81	0.499945	5933.03	0.681442		2676.7		10221	3.8185	10239.6	3.82546	8191.32	3.06023
osa-miR156c-5p	20	TGACAGAAGAGAGTGAGCAC	57704.1	8706.59		7387.99	0.848552	4351.7	0.499817	5933.03	0.681442		2676.7		10220.2	3.81819	10237.8	3.82477	8190.11	3.05977
osa-miR156g-5p	20	TGACAGAAGAGAGTGAGCAC	57704.1	8706.59		7387.99	0.848552	4351.7	0.499817	5933.03	0.681442		2676.7		10220.2	3.81819	10237.8	3.82477	8190.11	3.05977
osa-miR167b	21	TGAAGCTGCCAGCATGATCTA	25622.3	4292.68		3055.94	0.711895	1973.68	0.459779	1065.5	0.248214		3082.75		3337.54	1.08265	3987.18	1.29338	4826.99	1.5658
osa-miR167c-5p	21	TGAAGCTGCCAGCATGATCTA	25216.4	4197.05		3027.04	0.721229	1960.3	0.467066	1034.25	0.246424		3052.31		3265.86	1.06997	3923.21	1.28533	4756.38	1.55829
osa-miR167a-5p	21	TGAAGCTGCCAGCATGATCTA	25216.4	4197.05		3027.04	0.721229	1960.3	0.467066	1034.25	0.246424		3052.31		3265.86	1.06997	3923.21	1.28533	4756.38	1.55829
osa-miR166l-3p	21	TCGGACCAGGCTTCAATCCCT	32025	5589.63		4668.72	0.835246	2024.43	0.362177	1586.05	0.283748		2992.38		4485.7	1.49904	5262.36	1.75858	5415.75	1.80985
osa-miR166k-3p	21	TCGGACCAGGCTTCAATCCCT	31825.3	5561.25		4633.28	0.833137	2005.19	0.360566	1576.61	0.283499		2970.46		4457.91	1.50075	5232.61	1.76155	5388	1.81386
osa-miR395d	21	GTGAAGTGTTTGGGGGAACTC	5166.69	1101.03		563.054	0.511386	439.185	0.398884	578.817	0.525703		491.789		715.489	1.45487	667.864	1.35803	609.461	1.23927
osa-miR395y	21	GTGAAGTGTTTGGGGGAACTC	5165.81	1100.57		563.054	0.511603	439.743	0.39956	578.166	0.525334		491.789		715.164	1.45421	667.864	1.35803	609.461	1.23927
osa-miR395s	21	GTGAAGTGTTTGGGGGAACTC	5165.81	1100.57		563.054	0.511603	439.743	0.39956	578.166	0.525334		491.789		715.164	1.45421	667.864	1.35803	609.461	1.23927
osa-miR395g	21	GTGAAGTGTTTGGGGGAACTC	5165.81	1100.57		563.054	0.511603	439.743	0.39956	578.166	0.525334		491.789		715.164	1.45421	667.864	1.35803	609.461	1.23927
osa-miR395e	21	GTGAAGTGTTTGGGGGAACTC	5164.58	1100.57		562.71	0.51129	439.185	0.399053	578.166	0.525334		491.789		714.839	1.45355	667.864	1.35803	609.461	1.23927
osa-miR395k	21	GTGAAGTGTTTGGGGGAACTC	5163.24	1101.03		562.366	0.510761	439.185	0.398884	578.817	0.525703		491.058		714.676	1.45538	667.864	1.36005	608.244	1.23864
osa-miR395i	21	GTGAAGTGTTTGGGGGAACTC	5163.24	1101.03		562.366	0.510761	439.185	0.398884	578.817	0.525703		491.058		714.676	1.45538	667.864	1.36005	608.244	1.23864
osa-miR395j	21	GTGAAGTGTTTGGGGGAACTC	5161.13	1100.57		562.022	0.510665	439.185	0.399053	578.166	0.525334		491.058		714.026	1.45406	667.864	1.36005	608.244	1.23864
osa-miR395b	21	GTGAAGTGTTTGGGGGAACTC	5160.46	1100.57		561.678	0.510352	439.185	0.399053	578.166	0.525334		491.058		713.701	1.45339	667.864	1.36005	608.244	1.23864
osa-miR395h	21	GTGAAGTGTTTGGGGGAACTC	5160.46	1100.57		561.678	0.510352	439.185	0.399053	578.166	0.525334		491.058		713.701	1.45339	667.864	1.36005	608.244	1.23864
osa-miR395r	21	GTGAAGTGTTTGGGGGAACTC	5032.41	1055.66		540.346	0.511855	416.599	0.394633	552.122	0.52301		488.379		710.613	1.45504	663.125	1.35781	605.565	1.23995
osa-miR395q	21	GTGAAGTGTTTGGGGGAACTC	5032.41	1055.66		540.346	0.511855	416.599	0.394633	552.122	0.52301		488.379		710.613	1.45504	663.125	1.35781	605.565	1.23995
osa-miR395n	21	GTGAAGTGTTTGGGGGAACTC	5031.53	1055.2		540.346	0.512081	417.156	0.395335	551.471	0.522624		488.379		710.288	1.45438	663.125	1.35781	605.565	1.23995
osa-miR395l	21	GTGAAGTGTTTGGGGGAACTC	5031.53	1055.2		540.346	0.512081	417.156	0.395335	551.471	0.522624		488.379		710.288	1.45438	663.125	1.35781	605.565	1.23995
osa-miR395p	21	GTGAAGTGTTTGGGGGAACTC	5030.3	1055.2		540.002	0.511755	416.599	0.394807	551.471	0.522624		488.379		709.963	1.45371	663.125	1.35781	605.565	1.23995
osa-miR395m	21	GTGAAGTGTTTGGGGGAACTC	5029.63	1055.2		539.658	0.511429	416.599	0.394807	551.471	0.522624		488.379		709.638	1.45305	663.125	1.35781	605.565	1.23995
osa-miR156b-3p	21	GCTCACTCTCTATCTGTCAGC	1546.37	553.542		254.432	0.459644	214.992	0.388393	79.4327	0.143499		35.0756		144.983	4.13345	165.057	4.70576	98.8579	2.81842
osa-miR1883a	24	ACCTGTGACGGGCCGAGAATGGAA	1696.44	381.36		168.933	0.442976	171.213	0.448953	250.669	0.657302		143.469		187.243	1.30511	195.594	1.36332	197.959	1.37981
osa-miR167h-3p	21	AGGTCATGCTGTAGTTTCATC	1550.56	209.876		272.667	1.29918	102.337	0.487608	79.1071	0.376923		114.483		352.706	3.08086	283.52	2.47653	135.869	1.1868
osa-miR166j-5p	21	GAATGACGTCCGGTCTGAAGA	1154.97	227.327		70.0162	0.307998	58.558	0.257594	91.8033	0.403838		234.081		229.503	0.980442	135.573	0.579174	108.111	0.461852
osa-miR1862b	24	ACGAGGTTGGTTTATTTTGGGACG	1265	230.817		233.617	1.01213	73.8947	0.320144	102.221	0.442865		77.4586		152.46	1.96828	202.176	2.61011	192.359	2.48338
osa-miR1862c	24	ACGAGGTTGGTTTATTTTGGGACG	1265	230.817		233.617	1.01213	73.8947	0.320144	102.221	0.442865		77.4586		152.46	1.96828	202.176	2.61011	192.359	2.48338
osa-miR1862a	24	ACGAGGTTGGTTTATTTTGGGACG	1265	230.817		233.617	1.01213	73.8947	0.320144	102.221	0.442865		77.4586		152.46	1.96828	202.176	2.61011	192.359	2.48338
osa-miR1878	24	ACTTAATCTGGACACTATAAAAGA	865.397	159.85		159.3	0.996557	74.7312	0.467508	40.0419	0.250497		49.2032		125.966	2.56013	115.567	2.34876	140.738	2.86035
osa-miR1883b	24	ACCTGTGACGGGCCGAGAATGGAA	898.757	229.886		89.4555	0.389129	55.4907	0.241383	73.8984	0.321456		79.8944		112.313	1.40577	119.515	1.49592	138.304	1.73108
osa-miR396e-3p	24	ATGGTTCAAGAAAGCCCATGGAAA	703.84	94.9328		39.7389	0.4186	25.654	0.270233	30.2756	0.318916		34.832		171.314	4.9183	166.11	4.7689	140.982	4.04749
osa-miR5542	21	TTTGAGAAGGTATCATGAGAT	292.624	132.859		86.8751	0.653887	37.3656	0.281242	35.4843	0.267082		0.01		0.01	1	0.01	1	0.01	1
osa-miR2871a-5p	24	GACCGTAGAAACTAGCATAGAAAA	386.894	77.4819		75.5211	0.974693	32.6252	0.421069	30.6011	0.394945		28.7425		54.1249	1.8831	40.8037	1.41963	46.994	1.635
osa-miR1856	21	TATGCGTAAGACGGATTCGTA	469.003	45.605		30.1052	0.660129	19.2405	0.421895	23.7647	0.521099		41.1651		92.6462	2.2506	94.2433	2.2894	122.233	2.96934
osa-miR396c-3p	21	GGTCAAGAAAGCTGTGGGAAG	324.624	64.4519		28.557	0.443075	23.4232	0.363421	36.1354	0.560657		12.9098		59.9762	4.64579	56.0721	4.34337	43.0981	3.3384
osa-miR812p	24	GACGGACGATTAAAGTTGGGCATG	393.853	1.1634		0.01	0.0085955	0.01	0.0085955	0.6511	0.559653		66.0103		115.401	1.74823	106.879	1.61913	103.728	1.57139
osa-miR7694-5p	24	AACCTAGTACTGGATTAGTCACCA	262.921	36.0651		43.0075	1.1925	17.8463	0.494836	16.9283	0.469382		21.9222		41.447	1.89064	42.1199	1.92134	43.5851	1.98817
osa-miR1846d-5p	22	TCCCACCGAGCAGCCGGATCTC	196.37	32.1096		23.052	0.717916	15.3366	0.477633	15.6261	0.486649		13.6405		27.3063	2.00185	37.6447	2.75977	31.654	2.32059
osa-miR156l-5p	21	CGACAGAAGAGAGTGAGCATA	244.009	70.5015		47.1362	0.668584	25.0963	0.355968	39.0652	0.554105		5.6023		23.893	4.26486	17.3745	3.10132	15.34	2.73816
osa-miR166a-5p	21	GGAATGTTGTCTGGTTCAAGG	134.144	31.6443		19.9555	0.630619	9.4808	0.299605	7.162	0.226328		11.9354		21.9425	1.83844	17.901	1.49982	14.1226	1.18325
osa-miR166e-5p	21	GGAATGTTGTCTGGTTCAAGG	126.286	30.2482		18.0631	0.597163	8.6443	0.285779	7.162	0.236774		11.2047		20.9673	1.8713	16.848	1.50365	13.1486	1.17349
osa-miR1868	24	TCACGGAAAACGAGGGAGCAGCCA	104.471	18.1489		14.1064	0.777259	5.2981	0.291924	11.394	0.627807		5.8459		16.9039	2.89158	18.1642	3.10717	14.6095	2.4991
miR812-y	24	GAACGGTCAAACGTTGGACACGGA	4980.72	790.176		434.203	0.549502	379.512	0.480288	343.123	0.434236		517.852		919.473	1.77555	798.699	1.54233	797.681	1.54036
miR812-x	20	TTTGTGTCCAACGTTTGACT	321.488	36.7632		19.0953	0.519413	12.5482	0.341325	9.4408	0.2568		50.4211		81.7562	1.62147	57.6516	1.1434	53.8118	1.06725
miR5168-y	21	TCGGATTAGGCTTCAATCCCT	298.399	55.6101		36.2983	0.652729	17.8463	0.320918	11.0685	0.199038		21.4351		53.3122	2.48714	52.9131	2.46853	49.9159	2.3287
miR1130-y	24	CTCTTATATTATGGGACAGAGGGA	121.342	35.8325		9.1176	0.254451	4.7404	0.132293	3.2554	0.0908505		6.5767		19.0169	2.89156	15.5317	2.36163	27.2711	4.14662
miR1862-y	24	ACTAGGTTTGTTTATTTTGGGAAA	108.178	20.243		22.5359	1.11327	8.9231	0.440799	9.7663	0.482453		6.0895		15.441	2.53568	11.0565	1.81567	14.1226	2.31917
novel-m0342-5p	21	TGAAGAAGGATGTGGACGGTG	863.293	195.217		83.9506	0.430037	63.2984	0.324246	68.0386	0.348528		135.187		138.807	1.02678	95.0331	0.702975	83.7613	0.619595
novel-m0485-3p	22	AACACCGGATTCGAATCTTTTG	3202.99	0.4654		0.01	0.0214869	0.01	0.0214869	1.6277	3.49742		559.504		935.239	1.67155	937.431	1.67547	768.705	1.3739
novel-m0113-3p	20	TAGAGAGGGAGGGCAGAGGA	644.631	89.1158		35.0941	0.393803	36.8079	0.413035	128.59	1.44295		30.4475		106.137	3.4859	126.886	4.16738	91.5531	3.00692
novel-m0612-5p	21	TCGTGCGGCGAGGCTGCGAGA	150.691	31.8769		7.2253	0.226663	12.827	0.402392	10.7429	0.337012		25.8195		25.6809	0.994632	22.6395	0.876837	13.8791	0.537543
									in total：60
											zy22h≤0.5
osa-miR396f-5p	22	TCTCCACAGGCTTTCTTGAACT	1.07274e+06	169041		155950	0.922556	85432.3	0.505393	66138.1	0.391254		127350		143047	1.12325	150676	1.18316	175104	1.37498
osa-miR396e-5p	21	TCCACAGGCTTTCTTGAACTG	1.0713e+06	168798		155797	0.922979	85359.2	0.505689	65905.4	0.390439		127244		142906	1.12309	150462	1.18247	174831	1.37399
osa-miR167f	21	TGAAGCTGCCAGCATGATCTG	619519	130227		79923.7	0.613726	48014.5	0.368698	62802.6	0.482255		65130.7		68808.7	1.05647	72940.4	1.11991	91671.4	1.4075
osa-miR167j	21	TGAAGCTGCCAGCATGATCTG	619543	130240		79928.9	0.613705	48013.1	0.368652	62810.1	0.482265		65133.1		68807.7	1.05642	72940.4	1.11987	91669.5	1.40742
osa-miR167d-5p	21	TGAAGCTGCCAGCATGATCTG	619543	130240		79928.9	0.613705	48013.1	0.368652	62810.1	0.482265		65133.1		68807.7	1.05642	72940.4	1.11987	91669.5	1.40742
osa-miR167h-5p	21	TGAAGCTGCCAGCATGATCTG	619427	130215		79911.8	0.613691	48006.2	0.368668	62794.5	0.482236		65122.2		68797.1	1.05643	72927.7	1.11986	91652.7	1.4074
osa-miR167g	21	TGAAGCTGCCAGCATGATCTG	619400	130227		79901.7	0.613557	47990.8	0.368516	62790.2	0.48216		65117.6		68796.5	1.0565	72924.8	1.1199	91651.2	1.40747
osa-miR166c-3p	21	TCGGACCAGGCTTCATTCCCC	143496	17451.1		29737.8	1.70406	13934	0.798461	8452.42	0.484348		16931.3		17430.2	1.02947	19991.4	1.18074	19567.5	1.1557
osa-miR166j-3p	21	TCGGACCAGGCTTCATTCCCC	143384	17431.8		29716.3	1.70472	13917.9	0.798417	8446.88	0.484567		16916.2		17423.3	1.02998	19977.5	1.18097	19554.1	1.15594
osa-miR166a-3p	21	TCGGACCAGGCTTCATTCCCC	131014	16516		27191.2	1.64636	11943.9	0.723172	7614.14	0.461017		14553		15898.1	1.09243	18751.3	1.28848	18546.1	1.27439
osa-miR166d-3p	21	TCGGACCAGGCTTCATTCCCC	131014	16516		27191.2	1.64636	11943.9	0.723172	7614.14	0.461017		14553		15898.1	1.09243	18751.3	1.28848	18546.1	1.27439
osa-miR166f	21	TCGGACCAGGCTTCATTCCCC	131014	16516		27191.2	1.64636	11943.9	0.723172	7614.14	0.461017		14553		15898.1	1.09243	18751.3	1.28848	18546.1	1.27439
osa-miR166b-3p	21	TCGGACCAGGCTTCATTCCCC	130951	16507.8		27178.3	1.64639	11945.3	0.723613	7609.91	0.460988		14551.5		15884.3	1.09159	18737.6	1.28767	18536.8	1.27388
osa-miR396c-5p	21	TTCCACAGCTTTCTTGAACTT	85260.7	13621.2		12409.2	0.91102	6469.55	0.474961	3030.81	0.222507		7847.67		14253.9	1.81632	14960.5	1.90636	12667.9	1.61423
osa-miR5788	21	TGGATGTGACATACTCTAGTA	68807.5	8410.63		6109.47	0.726399	10710.8	1.27349	3743.43	0.445083		7173.44		12956.7	1.8062	10840.9	1.51125	8862.14	1.23541
osa-miR167b	21	TGAAGCTGCCAGCATGATCTA	25622.3	4292.68		3055.94	0.711895	1973.68	0.459779	1065.5	0.248214		3082.75		3337.54	1.08265	3987.18	1.29338	4826.99	1.5658
osa-miR167c-5p	21	TGAAGCTGCCAGCATGATCTA	25216.4	4197.05		3027.04	0.721229	1960.3	0.467066	1034.25	0.246424		3052.31		3265.86	1.06997	3923.21	1.28533	4756.38	1.55829
osa-miR167a-5p	21	TGAAGCTGCCAGCATGATCTA	25216.4	4197.05		3027.04	0.721229	1960.3	0.467066	1034.25	0.246424		3052.31		3265.86	1.06997	3923.21	1.28533	4756.38	1.55829
osa-miR166l-3p	21	TCGGACCAGGCTTCAATCCCT	32025	5589.63		4668.72	0.835246	2024.43	0.362177	1586.05	0.283748		2992.38		4485.7	1.49904	5262.36	1.75858	5415.75	1.80985
osa-miR166k-3p	21	TCGGACCAGGCTTCAATCCCT	31825.3	5561.25		4633.28	0.833137	2005.19	0.360566	1576.61	0.283499		2970.46		4457.91	1.50075	5232.61	1.76155	5388	1.81386
osa-miR166g-3p	21	TCGGACCAGGCTTCATTCCTC	19468	2864.04		3764.01	1.31423	1847.09	0.644924	1103.92	0.385441		1980.8		2388	1.20557	2779.12	1.40303	2740.99	1.38378
osa-miR156h-3p	22	GCTCACTTCTCTTTCTGTCAGC	24415	1712.75		2308.3	1.34772	1451.12	0.84725	617.231	0.360375		2303.05		5696.77	2.47357	6089.22	2.64398	4236.52	1.83952
osa-miR156f-3p	22	GCTCACTTCTCTTTCTGTCAGC	24415	1712.75		2308.3	1.34772	1451.12	0.84725	617.231	0.360375		2303.05		5696.77	2.47357	6089.22	2.64398	4236.52	1.83952
osa-miR156l-3p	22	GCTCACTTCTCTTTCTGTCAGC	23595.6	1632.47		2215.92	1.3574	1419.61	0.86961	599.326	0.367128		2160.8		5493.27	2.54224	5946.28	2.75189	4127.92	1.91037
osa-miR1862d	24	ACTAGGTTTGTTTATTTTGGGACG	16578.1	2960.6		4120.63	1.39182	2222.14	0.75057	1382.26	0.466885		1136.06		1560.52	1.37363	1665.05	1.46564	1530.84	1.3475
osa-miR827	21	TTAGATGACCATCAGCAAACA	1898.65	188.237		229.488	1.21914	247.617	1.31545	61.8533	0.328593		320.552		324.912	1.0136	266.672	0.831915	259.319	0.808978
osa-miR156g-3p	22	GCTCACTTCTCTCTCTGTCAGC	16907.7	1149.2		1985.22	1.72749	983.775	0.856053	490.92	0.427185		1376.72		3294.3	2.39287	4050.88	2.94242	3576.66	2.59796
osa-miR156c-3p	22	GCTCACTTCTCTCTCTGTCAGC	16887.8	1148.27		1982.99	1.72694	981.823	0.855047	489.292	0.426113		1374.77		3292.52	2.39496	4046.14	2.94315	3572.03	2.59828
osa-miR1871	24	ATGGCTCTGATATCATGTTGGTTT	11230.9	1023.78		1476.88	1.44257	1526.97	1.4915	367.864	0.359318		2181.02		1632.2	0.748365	1491.31	0.683767	1530.84	0.70189
osa-miR162a	21	TCGATAAACCTCTGCATCCAG	12526.1	1715.77		2397.41	1.39728	1550.67	0.903776	849.669	0.495211		1003.31		1632.69	1.6273	1717.44	1.71178	1659.16	1.65369
osa-miR166h-3p	21	TCGGACCAGGCTTCATTCCTC	9794.69	1427.71		1971.12	1.38061	795.274	0.557026	467.481	0.327433		962.873		1243.25	1.29118	1449.71	1.50561	1477.27	1.53423
osa-miR1863a	24	AGCTCTGATACCATGTTAGATTAG	6023.31	426.267		723.042	1.69622	850.486	1.9952	141.286	0.33145		1185.99		1015.21	0.855998	729.464	0.615066	951.568	0.802338
osa-miR166m	21	TCGGACCAGGCTTCATTCCCT	5161.51	813.676		845.355	1.03893	434.445	0.533928	213.231	0.262059		554.389		727.842	1.31287	890.31	1.60593	682.265	1.23066
osa-miR810b.1	21	TGAACACCGATATGCGTCATC	2836.54	391.132		277.656	0.709878	255.146	0.652326	127.613	0.326266		281.579		641.86	2.2795	481.22	1.70901	380.335	1.35072
osa-miR156b-3p	21	GCTCACTCTCTATCTGTCAGC	1546.37	553.542		254.432	0.459644	214.992	0.388393	79.4327	0.143499		35.0756		144.983	4.13345	165.057	4.70576	98.8579	2.81842
osa-miR167h-3p	21	AGGTCATGCTGTAGTTTCATC	1550.56	209.876		272.667	1.29918	102.337	0.487608	79.1071	0.376923		114.483		352.706	3.08086	283.52	2.47653	135.869	1.1868
osa-miR2878-3p	24	CAGGATTTTATACATGTAAAGAAT	1651.59	141.236		202.479	1.43363	185.434	1.31294	70.3174	0.497872		226.53		340.19	1.50175	277.465	1.22485	207.942	0.917947
osa-miR166j-5p	21	GAATGACGTCCGGTCTGAAGA	1154.97	227.327		70.0162	0.307998	58.558	0.257594	91.8033	0.403838		234.081		229.503	0.980442	135.573	0.579174	108.111	0.461852
osa-miR1862b	24	ACGAGGTTGGTTTATTTTGGGACG	1265	230.817		233.617	1.01213	73.8947	0.320144	102.221	0.442865		77.4586		152.46	1.96828	202.176	2.61011	192.359	2.48338
osa-miR1862c	24	ACGAGGTTGGTTTATTTTGGGACG	1265	230.817		233.617	1.01213	73.8947	0.320144	102.221	0.442865		77.4586		152.46	1.96828	202.176	2.61011	192.359	2.48338
osa-miR1862a	24	ACGAGGTTGGTTTATTTTGGGACG	1265	230.817		233.617	1.01213	73.8947	0.320144	102.221	0.442865		77.4586		152.46	1.96828	202.176	2.61011	192.359	2.48338
osa-miR166i-3p	21	TCGGATCAGGCTTCATTCCTC	1016.79	163.573		240.326	1.46923	95.9236	0.586427	46.5528	0.2846		92.8041		146.284	1.57626	123.464	1.33037	107.867	1.16231
osa-miR1878	24	ACTTAATCTGGACACTATAAAAGA	865.397	159.85		159.3	0.996557	74.7312	0.467508	40.0419	0.250497		49.2032		125.966	2.56013	115.567	2.34876	140.738	2.86035
osa-miR1883b	24	ACCTGTGACGGGCCGAGAATGGAA	898.757	229.886		89.4555	0.389129	55.4907	0.241383	73.8984	0.321456		79.8944		112.313	1.40577	119.515	1.49592	138.304	1.73108
osa-miR1849	21	TATCGTATCCTAGGTTGGTTT	704.657	97.4922		104.594	1.07285	77.2408	0.792277	38.7397	0.397362		77.215		117.84	1.52612	96.0861	1.2444	95.449	1.23615
osa-miR167e-3p	21	AGATCATGTTGCAGCTTCACT	678.341	84.4623		77.2414	0.914507	43.5003	0.515026	22.137	0.262093		28.2553		157.336	5.56837	149.262	5.28264	116.146	4.11058
osa-miR167i-3p	21	AGATCATGTTGCAGCTTCACT	678.341	84.4623		77.2414	0.914507	43.5003	0.515026	22.137	0.262093		28.2553		157.336	5.56837	149.262	5.28264	116.146	4.11058
osa-miR396e-3p	24	ATGGTTCAAGAAAGCCCATGGAAA	703.84	94.9328		39.7389	0.4186	25.654	0.270233	30.2756	0.318916		34.832		171.314	4.9183	166.11	4.7689	140.982	4.04749
osa-miR1870-3p	24	TTTAGGGCTAATTCAGCATGAACA	526.473	82.3681		54.0174	0.655805	46.0099	0.558589	25.718	0.312233		63.0873		89.2329	1.41444	80.8176	1.28104	85.2223	1.35086
osa-miR2863c	24	TTAGTAGGACTAGAATGGGCCAAA	355.599	67.0114		34.75	0.518568	42.106	0.628341	23.1136	0.34492		42.8701		46.4857	1.08434	50.8071	1.18514	48.455	1.13027
osa-miR2864.1	21	TTTTGCTGCCCTTGTTTTGCA	426.124	47.4664		58.8342	1.23949	35.9714	0.757829	22.137	0.466372		31.1783		88.5828	2.84117	81.0808	2.60055	60.8731	1.95242
osa-miR5542	21	TTTGAGAAGGTATCATGAGAT	292.624	132.859		86.8751	0.653887	37.3656	0.281242	35.4843	0.267082		0.01		0.01	1	0.01	1	0.01	1
osa-miR2871a-5p	24	GACCGTAGAAACTAGCATAGAAAA	386.894	77.4819		75.5211	0.974693	32.6252	0.421069	30.6011	0.394945		28.7425		54.1249	1.8831	40.8037	1.41963	46.994	1.635
osa-miR1863b.2	23	AGAGACTTGGCTGATGCATTACT	269.096	46.0703		69.6721	1.5123	33.7406	0.732372	20.5093	0.445174		20.9479		25.8434	1.2337	28.6942	1.36979	23.6187	1.1275
osa-miR2874	24	ATGTGAACAGTGTCAAACAGTGTC	204.228	21.4064		23.7401	1.10902	28.4425	1.32869	9.4408	0.441027		31.6654		31.3697	0.990662	25.5352	0.806407	32.628	1.0304
osa-miR7694-5p	24	AACCTAGTACTGGATTAGTCACCA	262.921	36.0651		43.0075	1.1925	17.8463	0.494836	16.9283	0.469382		21.9222		41.447	1.89064	42.1199	1.92134	43.5851	1.98817
osa-miR818c	22	AATCCCTTATATTATGGGACGG	176.166	19.7777		17.7191	0.895913	29.0002	1.46631	9.7663	0.493804		28.0117		29.0942	1.03864	18.6907	0.667246	24.1057	0.860558
osa-miR818a	22	AATCCCTTATATTATGGGACGG	174.237	19.7777		17.375	0.878515	29.0002	1.46631	9.1152	0.460883		28.2553		28.444	1.00668	18.1642	0.64286	24.1057	0.853139
osa-miR1846d-5p	22	TCCCACCGAGCAGCCGGATCTC	196.37	32.1096		23.052	0.717916	15.3366	0.477633	15.6261	0.486649		13.6405		27.3063	2.00185	37.6447	2.75977	31.654	2.32059
osa-miR5814	24	AATCAAGTTAGGAACCATGCAAGT	231.418	26.758		40.7711	1.5237	24.8175	0.92748	12.6962	0.474482		15.8327		33.8077	2.13531	32.9062	2.07837	43.8286	2.76823
osa-miR2905	21	TACATGTCAGTGACAAAGGCA	151.503	17.4509		15.8267	0.906927	18.404	1.05462	7.162	0.410409		24.8452		20.1546	0.811207	21.8497	0.879433	25.8102	1.03884
osa-miR166a-5p	21	GGAATGTTGTCTGGTTCAAGG	134.144	31.6443		19.9555	0.630619	9.4808	0.299605	7.162	0.226328		11.9354		21.9425	1.83844	17.901	1.49982	14.1226	1.18325
osa-miR166e-5p	21	GGAATGTTGTCTGGTTCAAGG	126.286	30.2482		18.0631	0.597163	8.6443	0.285779	7.162	0.236774		11.2047		20.9673	1.8713	16.848	1.50365	13.1486	1.17349
osa-miR812r	24	ACGTTAGACACGAATTTCTACGGC	140.548	19.545		13.7624	0.704139	13.3847	0.684815	9.4408	0.483029		16.5635		19.8295	1.19718	23.4292	1.41451	24.5927	1.48475
osa-miR1428e-3p	21	TAAGATAATGCCATGAATTTG	111.294	6.2823		7.5693	1.20486	5.0193	0.798959	1.6277	0.259093		29.4732		31.2072	1.05883	18.4275	0.625229	11.6876	0.39655
osa-miR2863a	21	TTGTCCCATTCTAGTTTAGCT	128.191	16.2875		30.1052	1.84836	15.6155	0.958741	7.813	0.479693		7.7946		20.4797	2.62742	18.1642	2.33036	11.9311	1.53069
osa-miR5512a	21	TAGGATATGGTAATGCTAAAA	119.686	14.8914		13.5904	0.912634	10.3174	0.692843	5.5342	0.371637		12.6662		21.9425	1.73237	20.5335	1.62113	20.2099	1.59558
osa-miR5512b	21	TAGGATATGGTAATGCTAAAA	119.686	14.8914		13.5904	0.912634	10.3174	0.692843	5.5342	0.371637		12.6662		21.9425	1.73237	20.5335	1.62113	20.2099	1.59558
miR396-x	20	TCCACAGGCTTCTTGAACTG	7185.79	1008.89		984.871	0.976189	649.437	0.643712	420.928	0.417218		860.813		1117.28	1.29794	1068.79	1.24161	1074.77	1.24856
miR5139-x	18	AACCTGGCTCTGATACCA	5734.56	923.268		503.531	0.54538	874.467	0.947143	234.392	0.253872		635.258		1290.38	2.03128	532.554	0.838327	740.703	1.16599
miR812-y	24	GAACGGTCAAACGTTGGACACGGA	4980.72	790.176		434.203	0.549502	379.512	0.480288	343.123	0.434236		517.852		919.473	1.77555	798.699	1.54233	797.681	1.54036
miR8155-y	18	AACCTGGCTCTGATACCA	5134.22	856.256		426.634	0.498255	776.033	0.90631	183.932	0.21481		568.029		1239.02	2.18126	448.314	0.789244	636.002	1.11966
miR894-x	19	TTTCACGTCGGGTTCACCA	5677.35	1014.71		626.877	0.617789	663.658	0.654037	235.368	0.231956		513.955		1435.85	2.79374	537.292	1.04541	649.637	1.264
miR1511-y	18	AACCTGGCTCTGATACCA	2482.8	510.496		200.587	0.392925	450.897	0.883252	103.523	0.202789		270.618		593.261	2.19225	154.001	0.569072	199.42	0.736907
miR166-y	21	TCGGATTAGGCTTCATTCCCC	2994.15	448.837		474.63	1.05747	259.607	0.5784	87.2457	0.194382		322.013		447.628	1.39009	508.598	1.57943	445.591	1.38377
miR167-x	20	TGAAGCTGCCAGCATGATGA	1397.08	257.575		184.416	0.71597	146.953	0.570524	72.9218	0.283109		155.161		200.733	1.29371	168.216	1.08414	211.108	1.36058
miR165-y	18	TCGGACCAGGCTTCACCC	647.106	74.2244		106.659	1.43697	62.4619	0.841528	13.6728	0.184209		83.5481		103.699	1.24119	113.724	1.36118	89.1182	1.06667
miR5160-y	24	GCGAGATCGACGTTATATTTCTGC	454.558	123.785		137.968	1.11458	141.097	1.13986	46.8783	0.378708		2.1922		0.6501	0.296551	0.5265	0.24017	1.461	0.666454
miR812-x	20	TTTGTGTCCAACGTTTGACT	321.488	36.7632		19.0953	0.519413	12.5482	0.341325	9.4408	0.2568		50.4211		81.7562	1.62147	57.6516	1.1434	53.8118	1.06725
miR171-y	22	TTGAGCCGTGCCAATATCACGA	269.899	53.516		50.4048	0.941864	31.231	0.583582	24.4158	0.456234		22.8966		33.4827	1.46234	31.0634	1.35668	22.8883	0.999638
miR5145-x	24	CCACCTGTTTGGATCCTTGAGAGC	146.913	26.2927		14.7946	0.562689	18.404	0.699966	11.394	0.433352		18.5121		20.6422	1.11507	17.6377	0.952766	19.2359	1.0391
miR156-y	23	GCTCACTGCTCTGTCTGTCATCC	351.231	29.5502		44.3837	1.50198	23.1444	0.783223	5.2087	0.176266		24.358		78.9931	3.243	87.3988	3.58809	58.1946	2.38914
miR5168-y	21	TCGGATTAGGCTTCAATCCCT	298.399	55.6101		36.2983	0.652729	17.8463	0.320918	11.0685	0.199038		21.4351		53.3122	2.48714	52.9131	2.46853	49.9159	2.3287
miR5799-x	21	ATAAGACGAATAGTCAAACGA	235.881	34.2037		17.8911	0.523075	22.8655	0.66851	16.9283	0.494926		37.0242		40.3092	1.08873	28.4309	0.7679	38.2283	1.03252
miR5809-y	21	CTCGTCGCCGGCGACCACAGC	168.452	26.2927		21.1597	0.804775	30.6733	1.16661	10.0919	0.383829		20.2172		26.4936	1.31045	18.4275	0.911476	15.0965	0.746716
miR1130-y	24	CTCTTATATTATGGGACAGAGGGA	121.342	35.8325		9.1176	0.254451	4.7404	0.132293	3.2554	0.0908505		6.5767		19.0169	2.89156	15.5317	2.36163	27.2711	4.14662
miR156-x	22	CTTGACAGAAGAGAGTGAGCAC	166.308	20.243		19.2673	0.951801	12.2693	0.606101	9.7663	0.482453		4.8716		37.3836	7.67378	34.7489	7.13295	27.7581	5.69794
miR1862-y	24	ACTAGGTTTGTTTATTTTGGGAAA	108.178	20.243		22.5359	1.11327	8.9231	0.440799	9.7663	0.482453		6.0895		15.441	2.53568	11.0565	1.81567	14.1226	2.31917
novel-m0342-5p	21	TGAAGAAGGATGTGGACGGTG	863.293	195.217		83.9506	0.430037	63.2984	0.324246	68.0386	0.348528		135.187		138.807	1.02678	95.0331	0.702975	83.7613	0.619595
novel-m0248-5p	21	CCCGCCACCGGCGCCGCTTCC	392.884	100.75		40.427	0.401262	65.5292	0.650416	47.2038	0.468525		55.7799		51.3618	0.920794	21.8497	0.391713	9.9832	0.178975
novel-m0644-3p	21	TTTCGTTCTCTCCCTTTAACA	403.088	101.448		125.582	1.2379	92.8563	0.915311	43.6229	0.430003		3.1665		12.3528	3.90109	12.3727	3.90737	11.6876	3.69102
novel-m0318-3p	22	TTAATTCATTGATTGTTTTCAG	329.832	35.3671		34.0619	0.963096	46.2887	1.30881	10.7429	0.303754		60.8951		52.4995	0.86213	47.1217	0.773818	42.8546	0.703745
novel-m0612-5p	21	TCGTGCGGCGAGGCTGCGAGA	150.691	31.8769		7.2253	0.226663	12.827	0.402392	10.7429	0.337012		25.8195		25.6809	0.994632	22.6395	0.876837	13.8791	0.537543
novel-m0052-3p	21	TTCATGCGCACATTATTAACT	157.769	15.5895		28.3849	1.82077	17.8463	1.14476	5.8598	0.375881		15.102		29.4192	1.94803	23.166	1.53397	22.4013	1.48333
novel-m0631-3p	23	ATGTCTAACATGTGTTCTTTTAG	147.724	16.7528		23.3961	1.39655	13.1058	0.782305	6.5109	0.388645		28.9861		20.4797	0.706535	19.7437	0.681144	18.7489	0.646824
novel-m0236-5p	21	CTGCACGTCATCAAGCGAGAA	106.282	11.4012		18.2352	1.59941	10.5962	0.929393	1.3022	0.114216		8.0382		22.1051	2.75001	26.3249	3.27497	8.2787	1.02992
											in total：96
																jn3h≤0.5
osa-miR159f	21	CTTGGATTGAAGGGAGCTCTA	5913.39	501.189		961.991	1.91942	771.851	1.54004	1377.38	2.74821		997.462		472.821	0.474024	485.432	0.486667	345.272	0.346151
osa-miR2877	24	TTGCATCCTCTGCACTTTGGGCCT	402.318	20.9411		107.519	5.13434	70.5485	3.3689	67.3876	3.21796		49.934		19.3419	0.387349	34.7489	0.695897	31.8975	0.638793
osa-miR5811	24	CCTAACCTAGGAGTTCGATGGGAC	106.552	8.8418		12.5582	1.42032	25.3751	2.8699	29.2989	3.31368		12.9098		6.1764	0.478427	5.7915	0.448613	5.6003	0.433802
miR5160-y	24	GCGAGATCGACGTTATATTTCTGC	454.558	123.785		137.968	1.11458	141.097	1.13986	46.8783	0.378708		2.1922		0.6501	0.296551	0.5265	0.24017	1.461	0.666454
miR319-y	23	TTTGGATTGAAGGGAGCTCTTTC	138.188	14.8914		15.3107	1.02816	23.9809	1.61039	23.4391	1.574		23.8709		11.8652	0.497057	12.8992	0.540373	11.9311	0.499818
																in total: 5
																		jn10h≤0.5
osa-miR159f	21	CTTGGATTGAAGGGAGCTCTA	5913.39	501.189		961.991	1.91942	771.851	1.54004	1377.38	2.74821		997.462		472.821	0.474024	485.432	0.486667	345.272	0.346151
osa-miR394	20	TTGGCATTCTGTCCACCTCC	2307.86	466.986		345.78	0.740451	522.561	1.11901	431.997	0.925075		232.132		196.833	0.847934	75.2894	0.324339	36.2803	0.156292
osa-miR5072	22	CGATTCCCCAGCGGAGTCGCCA	1818.54	324.586		164.977	0.508267	743.129	2.28947	243.507	0.750206		150.046		119.79	0.798357	38.1712	0.254397	34.3324	0.228813
osa-miR159d	21	ATTGGATTGAAGGGAGCTCCG	1438.14	84.9276		209.36	2.46516	229.771	2.70549	269.876	3.17771		259.657		145.146	0.558991	123.99	0.477517	115.415	0.444492
osa-miR159c	21	ATTGGATTGAAGGGAGCTCCA	1421.62	82.8335		206.608	2.49426	228.376	2.75705	265.318	3.20303		258.195		143.845	0.557119	123.464	0.478181	112.98	0.437577
osa-miR159e	21	ATTGGATTGAAGGGAGCTCCT	1416.03	82.8335		205.576	2.48179	226.982	2.74022	265.318	3.20303		257.221		142.708	0.554806	122.411	0.475898	112.98	0.439235
osa-miR395a	21	GTGAAGTGCTTGGGGGAACTC	197.211	24.1986		20.2995	0.838871	22.5867	0.933389	26.0435	1.07624		41.8958		25.0307	0.597451	18.1642	0.433557	18.9924	0.453325
osa-miR5811	24	CCTAACCTAGGAGTTCGATGGGAC	106.552	8.8418		12.5582	1.42032	25.3751	2.8699	29.2989	3.31368		12.9098		6.1764	0.478427	5.7915	0.448613	5.6003	0.433802
miR5054-y	19	TTCCCCACGGACGGCGCCA	2092.48	297.828		238.605	0.801151	685.129	2.30042	215.184	0.722512		330.051		209.185	0.633796	59.7576	0.181055	56.7337	0.171894
miR8175-y	19	ATCCCCGGCAACGGCGCCA	2854.14	289.452		241.53	0.834439	559.369	1.93251	750.704	2.59354		330.539		399.842	1.20967	136.363	0.412548	146.339	0.442728
miR7767-x	20	CCCAAGATGAGTGCTCTCCC	519.384	45.3723		74.1449	1.63414	106.241	2.34154	94.7332	2.08791		80.8687		47.9485	0.592918	35.0122	0.432951	35.0629	0.433578
miR5160-y	24	GCGAGATCGACGTTATATTTCTGC	454.558	123.785		137.968	1.11458	141.097	1.13986	46.8783	0.378708		2.1922		0.6501	0.296551	0.5265	0.24017	1.461	0.666454
miR6300-y	18	GTCGTTGTAGTATAGTGA	191.941	22.1044		11.526	0.521435	77.5197	3.50698	40.693	1.84095		6.5767		32.5074	4.94281	0.5265	0.0800553	0.487	0.0740493
novel-m0267-5p	22	AATCGGTACTGCAGTAGCTCTT	459.083	5.3516		14.2785	2.66808	26.4905	4.95001	353.215	66.0017		25.5759		17.554	0.686349	10.53	0.411716	6.0873	0.238009
novel-m0248-5p	21	CCCGCCACCGGCGCCGCTTCC	392.884	100.75		40.427	0.401262	65.5292	0.650416	47.2038	0.468525		55.7799		51.3618	0.920794	21.8497	0.391713	9.9832	0.178975
																		in total: 15
																				jn22h≤0.5
osa-miR169b	21	CAGCCAAGGATGACTTGCCGG	73730.2	15545.5		11267.3	0.724794	15183.3	0.9767	12499.3	0.804044		6129.7		5963.82	0.972938	4218.84	0.688261	2922.64	0.476799
osa-miR1425-5p	21	TAGGATTCAATCCTTGCTGCT	32186.2	3042.04		3128.71	1.02849	7455	2.45066	4562.82	1.49992		4216.62		4698.14	1.1142	3195.06	0.75773	1887.8	0.447703
osa-miR6251	21	TGTGTAGCCACATTGTAAGGG	19317.3	1695.99		2223.31	1.31092	4101.57	2.41839	2156.4	1.27147		3265.93		2255.37	0.690575	2043.08	0.625574	1575.64	0.482448
osa-miR444a-3p.2	21	TGCAGTTGCTGCCTCAAGCTT	12645.3	795.993		902.297	1.13355	1455.31	1.82829	1147.87	1.44206		2764.39		2281.05	0.825153	1975.95	0.714786	1322.41	0.478371
osa-miR444e	21	TGCAGTTGCTGCCTCAAGCTT	12635.8	796.458		902.297	1.13289	1454.75	1.82652	1147.87	1.44121		2761.71		2276.5	0.824306	1973.32	0.714527	1322.89	0.479012
osa-miR444d.2	21	TGCAGTTGCTGCCTCAAGCTT	12613.2	795.993		902.297	1.13355	1456.14	1.82934	1147.87	1.44206		2754.65		2268.04	0.823351	1970.42	0.715308	1317.78	0.478384
osa-miR159f	21	CTTGGATTGAAGGGAGCTCTA	5913.39	501.189		961.991	1.91942	771.851	1.54004	1377.38	2.74821		997.462		472.821	0.474024	485.432	0.486667	345.272	0.346151
osa-miR394	20	TTGGCATTCTGTCCACCTCC	2307.86	466.986		345.78	0.740451	522.561	1.11901	431.997	0.925075		232.132		196.833	0.847934	75.2894	0.324339	36.2803	0.156292
osa-miR5072	22	CGATTCCCCAGCGGAGTCGCCA	1818.54	324.586		164.977	0.508267	743.129	2.28947	243.507	0.750206		150.046		119.79	0.798357	38.1712	0.254397	34.3324	0.228813
osa-miR159d	21	ATTGGATTGAAGGGAGCTCCG	1438.14	84.9276		209.36	2.46516	229.771	2.70549	269.876	3.17771		259.657		145.146	0.558991	123.99	0.477517	115.415	0.444492
osa-miR159c	21	ATTGGATTGAAGGGAGCTCCA	1421.62	82.8335		206.608	2.49426	228.376	2.75705	265.318	3.20303		258.195		143.845	0.557119	123.464	0.478181	112.98	0.437577
osa-miR159e	21	ATTGGATTGAAGGGAGCTCCT	1416.03	82.8335		205.576	2.48179	226.982	2.74022	265.318	3.20303		257.221		142.708	0.554806	122.411	0.475898	112.98	0.439235
osa-miR166j-5p	21	GAATGACGTCCGGTCTGAAGA	1154.97	227.327		70.0162	0.307998	58.558	0.257594	91.8033	0.403838		234.081		229.503	0.980442	135.573	0.579174	108.111	0.461852
osa-miR5827	21	TTTGTTGCAATTTGGACTACC	478.208	34.9018		55.2216	1.5822	136.914	3.92284	25.718	0.736867		85.2531		59.9762	0.703508	43.6994	0.512584	36.5238	0.428416
osa-miR395a	21	GTGAAGTGCTTGGGGGAACTC	197.211	24.1986		20.2995	0.838871	22.5867	0.933389	26.0435	1.07624		41.8958		25.0307	0.597451	18.1642	0.433557	18.9924	0.453325
osa-miR2876-3p	21	TTCCTATATGAACACTGTTGC	158.838	12.5646		35.2661	2.80678	38.481	3.06265	8.7897	0.699561		23.8709		15.2785	0.640047	12.8992	0.540373	11.6876	0.489617
osa-miR1432-3p	21	CAGGTGTCATCTCCCCTGAAC	208.007	5.1189		22.7079	4.43609	58.8369	11.4941	16.9283	3.30702		27.281		42.7473	1.56693	23.4292	0.85881	10.9572	0.401642
osa-miR5811	24	CCTAACCTAGGAGTTCGATGGGAC	106.552	8.8418		12.5582	1.42032	25.3751	2.8699	29.2989	3.31368		12.9098		6.1764	0.478427	5.7915	0.448613	5.6003	0.433802
osa-miR1428e-3p	21	TAAGATAATGCCATGAATTTG	111.294	6.2823		7.5693	1.20486	5.0193	0.798959	1.6277	0.259093		29.4732		31.2072	1.05883	18.4275	0.625229	11.6876	0.39655
miR159-y	20	TTTGGATTGAAGGGAGCTTG	8061.99	764.116		1181.5	1.54623	1204.06	1.57576	1234.46	1.61554		1370.38		870.062	0.634904	786.063	0.573608	651.342	0.475299
miR5072-x	20	TCTCCCCAGCGGAGTCGCCA	5216.77	781.334		551.184	0.705439	1042.05	1.33369	658.575	0.842885		703.704		767.826	1.09112	381.185	0.541684	330.906	0.470235
miR5054-y	19	TTCCCCACGGACGGCGCCA	2092.48	297.828		238.605	0.801151	685.129	2.30042	215.184	0.722512		330.051		209.185	0.633796	59.7576	0.181055	56.7337	0.171894
miR8175-y	19	ATCCCCGGCAACGGCGCCA	2854.14	289.452		241.53	0.834439	559.369	1.93251	750.704	2.59354		330.539		399.842	1.20967	136.363	0.412548	146.339	0.442728
miR7767-x	20	CCCAAGATGAGTGCTCTCCC	519.384	45.3723		74.1449	1.63414	106.241	2.34154	94.7332	2.08791		80.8687		47.9485	0.592918	35.0122	0.432951	35.0629	0.433578
miR6478-x	20	CCGACCTTAGCTCAGTTGGA	336.281	33.273		12.3862	0.37226	35.6925	1.07272	132.496	3.9821		35.0756		53.7998	1.53382	22.113	0.630438	11.4441	0.32627
miR319-y	23	TTTGGATTGAAGGGAGCTCTTTC	138.188	14.8914		15.3107	1.02816	23.9809	1.61039	23.4391	1.574		23.8709		11.8652	0.497057	12.8992	0.540373	11.9311	0.499818
miR6300-y	18	GTCGTTGTAGTATAGTGA	191.941	22.1044		11.526	0.521435	77.5197	3.50698	40.693	1.84095		6.5767		32.5074	4.94281	0.5265	0.0800553	0.487	0.0740493
novel-m0267-5p	22	AATCGGTACTGCAGTAGCTCTT	459.083	5.3516		14.2785	2.66808	26.4905	4.95001	353.215	66.0017		25.5759		17.554	0.686349	10.53	0.411716	6.0873	0.238009
novel-m0248-5p	21	CCCGCCACCGGCGCCGCTTCC	392.884	100.75		40.427	0.401262	65.5292	0.650416	47.2038	0.468525		55.7799		51.3618	0.920794	21.8497	0.391713	9.9832	0.178975
novel-m0257-5p	21	CAGATTTGGTCAAGAGGAAGA	431.36	3.4902		1.0322	0.295742	5.8558	1.67778	403.023	115.473		4.3844		7.1516	1.63115	4.4752	1.02071	1.9479	0.44428
																				in total: 30

## Sheet: original-rep1
Original data of miRNAs expression (replicate 1)
				Ziyu44									JNXN
				mock		M. oryzae							mock		M. oryzae
miRNA ID	length	miRNA sequence	total reads	0 hpi_TPM		3 hpi_TPM	3 hpi/0 hpi	10 hpi_TPM	10 hpi/0 hpi	22 hpi_TPM	22 hpi/0 hpi		0 hpi_TPM		3 hpi_TPM	3 hpi/0 hpi	10 hpi_TPM	10 hpi/0 hpi	22 hpi_TPM	22 hpi/0 hpi
osa-miR159a.1	21	TTTGGATTGAAGGGAGCTCTG	2.12003e+06	136333		527497	3.86918	222304	1.63059	228660	1.67721		153260		382304	2.49448	354520	2.31319	115150	0.751339
osa-miR159b	21	TTTGGATTGAAGGGAGCTCTG	2.12003e+06	136333		527497	3.86918	222304	1.63059	228660	1.67721		153260		382304	2.49448	354520	2.31319	115150	0.751339
osa-miR168a-5p	21	TCGCTTGGTGCAGATCGGGAC	1.68546e+06	229285		156658	0.683247	167743	0.73159	237660	1.03652		212414		183926	0.865884	201822	0.950135	295950	1.39327
osa-miR396f-5p	22	TCTCCACAGGCTTTCTTGAACT	952996	140559		45459	0.323417	144074	1.02501	115538	0.821989		180759		87375.8	0.483383	88992.1	0.492325	150239	0.831159
osa-miR396e-5p	21	TCCACAGGCTTTCTTGAACTG	951842	140408		45273	0.32244	143933	1.0251	115407	0.821942		180581		87274.6	0.483298	88884.5	0.492213	150082	0.831103
osa-miR167f	21	TGAAGCTGCCAGCATGATCTG	702086	155613		53458	0.343532	121028	0.777751	77960.9	0.500993		117708		34193.9	0.290497	44543.9	0.378426	97579.7	0.828995
osa-miR167j	21	TGAAGCTGCCAGCATGATCTG	702077	155616		53456	0.343512	121035	0.777781	77964.6	0.501005		117711		34184.7	0.290412	44528.5	0.378287	97580.7	0.828986
osa-miR167d-5p	21	TGAAGCTGCCAGCATGATCTG	702077	155616		53456	0.343512	121035	0.777781	77964.6	0.501005		117711		34184.7	0.290412	44528.5	0.378287	97580.7	0.828986
osa-miR167h-5p	21	TGAAGCTGCCAGCATGATCTG	701936	155592		53440	0.343461	121011	0.777746	77941.1	0.500931		117692		34177.3	0.290396	44519.4	0.378271	97562.5	0.828965
osa-miR167g	21	TGAAGCTGCCAGCATGATCTG	701888	155589		53424.6	0.34337	121002	0.777698	77937.4	0.500917		117690		34167.3	0.290317	44514.5	0.378236	97563.4	0.82899
osa-miR393b-5p	22	TCCAAAGGGATCGCATTGATCT	155027	16582.4		19742.1	1.19054	14265	0.860253	19092.7	1.15139		12358.4		29929	2.42175	22405.6	1.81298	20651.7	1.67106
osa-miR393a	21	TCCAAAGGGATCGCATTGATC	153528	16312.9		19669.5	1.20576	13854.4	0.849289	18796.6	1.15225		12295.8		29857.9	2.42831	22293.4	1.81309	20447.4	1.66296
osa-miR166c-3p	21	TCGGACCAGGCTTCATTCCCC	127959	16568		2788.72	0.16832	36340.2	2.1934	17358.3	1.0477		20102		10689.2	0.531748	10552.8	0.524961	13560.1	0.674564
osa-miR166j-3p	21	TCGGACCAGGCTTCATTCCCC	127875	16556.5		2783.48	0.16812	36322.8	2.19387	17344.1	1.04757		20090.4		10682.2	0.531705	10547.2	0.524989	13548.3	0.674368
osa-miR166a-3p	21	TCGGACCAGGCTTCATTCCCC	121645	15683.3		2463.47	0.157076	33358.1	2.12698	16739.3	1.06733		19340.3		10250	0.529985	10365.8	0.535969	13444.7	0.695166
osa-miR166d-3p	21	TCGGACCAGGCTTCATTCCCC	121645	15683.3		2463.47	0.157076	33358.1	2.12698	16739.3	1.06733		19340.3		10250	0.529985	10365.8	0.535969	13444.7	0.695166
osa-miR166f	21	TCGGACCAGGCTTCATTCCCC	121645	15683.3		2463.47	0.157076	33358.1	2.12698	16739.3	1.06733		19340.3		10250	0.529985	10365.8	0.535969	13444.7	0.695166
osa-miR166b-3p	21	TCGGACCAGGCTTCATTCCCC	121542	15670.6		2463.29	0.157192	33333.3	2.12713	16724.3	1.06724		19322.8		10243.2	0.530108	10350	0.535639	13434.1	0.695246
osa-miR156d	20	TGACAGAAGAGAGTGAGCAC	115354	19649.5		2292.45	0.116667	19343.6	0.984434	20762.9	1.05666		16583.5		8307.91	0.500973	10123.4	0.610448	18290.8	1.10295
osa-miR156f-5p	20	TGACAGAAGAGAGTGAGCAC	115040	19600.5		2286.67	0.116664	19299.6	0.984653	20711.6	1.05669		16524.9		8285.01	0.501365	10094.2	0.610844	18238	1.10366
osa-miR156j-5p	20	TGACAGAAGAGAGTGAGCAC	115040	19600.5		2286.67	0.116664	19299.6	0.984653	20711.6	1.05669		16524.9		8285.01	0.501365	10094.2	0.610844	18238	1.10366
osa-miR156h-5p	20	TGACAGAAGAGAGTGAGCAC	115040	19600.5		2286.67	0.116664	19299.6	0.984653	20711.6	1.05669		16524.9		8285.01	0.501365	10094.2	0.610844	18238	1.10366
osa-miR444c.2	21	TGCAGTTGTTGTCTCAAGCTT	92251.2	9758.39		13862.1	1.42054	8036.33	0.82353	11402.2	1.16845		8441.96		19338	2.2907	13387.3	1.58581	8024.89	0.950595
osa-miR444b.2	21	TGCAGTTGTTGTCTCAAGCTT	92251.2	9758.39		13862.1	1.42054	8036.33	0.82353	11402.2	1.16845		8441.96		19338	2.2907	13387.3	1.58581	8024.89	0.950595
osa-miR168a-3p	24	GATCCCGCCTTGCACCAAGTGAAT	117251	13665.9		3580.25	0.261984	26532	1.94147	26390.3	1.93111		13899.9		8066.73	0.580346	9625.87	0.692516	15490.2	1.11441
osa-miR396c-5p	21	TTCCACAGCTTTCTTGAACTT	89736.5	12457.8		2032.93	0.163186	13290.6	1.06685	11424	0.917014		17388.8		6863.9	0.394732	11094.7	0.638038	15183.9	0.873204
osa-miR169c	21	CAGCCAAGGATGACTTGCCGG	113834	21144.1		14096.5	0.666688	12641.1	0.597853	19480.6	0.921324		10765.5		12855.4	1.19413	9994.12	0.92835	12856.8	1.19427
osa-miR169b	21	CAGCCAAGGATGACTTGCCGG	110043	19986.5		13740.6	0.687492	12378.6	0.619346	19059.5	0.953619		10448.1		12517.9	1.19811	9387.84	0.898525	12523.9	1.19868
osa-miR5794	21	TGAGGAATCACTAGTAGTCGT	59124.6	9965.82		2430.78	0.243912	13150.5	1.31956	12017.2	1.20584		6218.21		3443.52	0.55378	4340.38	0.698012	7558.14	1.21549
osa-miR5788	21	TGGATGTGACATACTCTAGTA	41553.5	6947.74		2262.83	0.325693	4550.68	0.654987	4837.65	0.696292		6096.96		4382.03	0.718723	4500.78	0.7382	7974.86	1.30801
osa-miR156b-5p	20	TGACAGAAGAGAGTGAGCAC	46533.7	7512.87		830.186	0.110502	7137.56	0.950044	7936.75	1.05642		7212.5		3581.04	0.496504	4561.14	0.632394	7761.67	1.07614
osa-miR156c-5p	20	TGACAGAAGAGAGTGAGCAC	46529.9	7511.83		830.186	0.110517	7137.19	0.950127	7936.03	1.05647		7211.56		3581.04	0.49657	4561.14	0.632477	7760.91	1.07618
osa-miR156g-5p	20	TGACAGAAGAGAGTGAGCAC	46529.9	7511.83		830.186	0.110517	7137.19	0.950127	7936.03	1.05647		7211.56		3581.04	0.49657	4561.14	0.632477	7760.91	1.07618
osa-miR156a	20	TGACAGAAGAGAGTGAGCAC	46290.3	7466.13		824.226	0.110395	7099.61	0.95091	7893.98	1.05731		7181.07		3565.04	0.496449	4538.17	0.631963	7722.06	1.07534
osa-miR156i	20	TGACAGAAGAGAGTGAGCAC	46290.3	7466.13		824.226	0.110395	7099.61	0.95091	7893.98	1.05731		7181.07		3565.04	0.496449	4538.17	0.631963	7722.06	1.07534
osa-miR156e	20	TGACAGAAGAGAGTGAGCAC	46290.3	7466.13		824.226	0.110395	7099.61	0.95091	7893.98	1.05731		7181.07		3565.04	0.496449	4538.17	0.631963	7722.06	1.07534
osa-miR171f-3p	21	TGATTGAGCCGTGCCAATATC	31666.8	2439.39		8012.19	3.28451	1080.98	0.443136	3518.16	1.44223		1960.24		6236.87	3.1817	5793.63	2.95558	2625.38	1.33932
osa-miR171e-3p	21	TGATTGAGCCGTGCCAATATC	31657.4	2436.67		8011.1	3.28772	1079.15	0.442877	3517.31	1.44349		1960		6237.24	3.18227	5790.22	2.95419	2625.76	1.33967
osa-miR171d-3p	21	TGATTGAGCCGTGCCAATATC	31656.7	2436.67		8010.74	3.28757	1079.15	0.442877	3517.31	1.44349		1960		6237.24	3.18227	5789.84	2.954	2625.76	1.33967
osa-miR171b	21	TGATTGAGCCGTGCCAATATC	31640.7	2438.76		7997.2	3.2792	1080.43	0.443025	3516.17	1.44178		1960.24		6233.43	3.17994	5790.59	2.95403	2623.86	1.33854
osa-miR171c-3p	21	TGATTGAGCCGTGCCAATATC	31640.7	2438.76		7997.2	3.2792	1080.43	0.443025	3516.17	1.44178		1960.24		6233.43	3.17994	5790.59	2.95403	2623.86	1.33854
osa-miR1425-5p	21	TAGGATTCAATCCTTGCTGCT	26918.3	2948.8		3245.98	1.10078	2084.97	0.707057	3801.96	1.28932		2699.28		4780.67	1.77109	4433.39	1.64243	2923.28	1.08298
osa-miR167b	21	TGAAGCTGCCAGCATGATCTA	42515.4	7967.4		1455.94	0.182737	4809.88	0.603695	6559.67	0.823314		7251.74		3124.04	0.430799	6298.17	0.868505	5048.55	0.696185
osa-miR167c-5p	21	TGAAGCTGCCAGCATGATCTA	42146.6	7853.46		1438.96	0.183227	4766.62	0.606945	6542.57	0.833081		7176.11		3124.53	0.435407	6291.15	0.876679	4953.23	0.690239
osa-miR167a-5p	21	TGAAGCTGCCAGCATGATCTA	42146.6	7853.46		1438.96	0.183227	4766.62	0.606945	6542.57	0.833081		7176.11		3124.53	0.435407	6291.15	0.876679	4953.23	0.690239
osa-miR167e-5p	21	TGAAGCTGCCAGCATGATCTG	18479.9	2096.93		2685.24	1.28056	2086.44	0.994999	2451.11	1.16891		1847.74		2973.47	1.60925	2725.22	1.4749	1613.81	0.873398
osa-miR167i-5p	21	TGAAGCTGCCAGCATGATCTG	18287.5	2073.34		2669.7	1.28763	2060.78	0.993938	2426.45	1.17031		1824.1		2950.08	1.61728	2694.28	1.47704	1588.79	0.871001
osa-miR166l-3p	21	TCGGACCAGGCTTCAATCCCT	31161.4	5333.72		707.744	0.132692	6290.48	1.17938	4564.26	0.855736		5153.95		2299.17	0.446098	2491.36	0.483389	4320.67	0.838322
osa-miR166k-3p	21	TCGGACCAGGCTTCAATCCCT	30942.7	5297.2		701.423	0.132414	6245.2	1.17896	4529.34	0.855044		5122.75		2279.72	0.445018	2475.42	0.483221	4291.68	0.837768
osa-miR6251	21	TGTGTAGCCACATTGTAAGGG	23945	2327.95		4072.37	1.74934	1883.15	0.808931	2476.48	1.06381		1800.7		5241.74	2.91094	4150.38	2.30486	1992.25	1.10637
osa-miR397a	21	TCATTGAGTGCAGCGTTGATG	13852	403.399		588.372	1.45853	543.149	1.34643	519.129	1.28689		2496.74		3807.2	1.52487	3052.47	1.22258	2441.56	0.9779
osa-miR396g	21	TCCACAGGCTTTCTTGAACGG	17237.5	2006.77		2162.06	1.07738	1856.2	0.924969	1415.56	0.705392		2774.91		2744.11	0.988898	1766.83	0.636715	2511.11	0.904931
osa-miR396h	21	TCCACAGGCTTTCTTGAACGG	17237.5	2006.77		2162.06	1.07738	1856.2	0.924969	1415.56	0.705392		2774.91		2744.11	0.988898	1766.83	0.636715	2511.11	0.904931
osa-miR396d	21	TCCACAGGCTTTCTTGAACGG	17234.6	2006.77		2161.34	1.07702	1855.83	0.924786	1415.13	0.705179		2773.97		2743.61	0.989058	1766.83	0.636932	2511.11	0.90524
osa-miR444a-3p.2	21	TGCAGTTGCTGCCTCAAGCTT	21484.1	1162.41		3040.1	2.61535	776.136	0.667697	1446.49	1.24439		1996.16		6216.56	3.11426	4518.81	2.26375	2327.48	1.16598
osa-miR444e	21	TGCAGTTGCTGCCTCAAGCTT	21469.2	1162.2		3039.56	2.61535	775.769	0.667501	1447.06	1.24511		1996.4		6209.91	3.11056	4514.64	2.26139	2323.69	1.16394
osa-miR444d.2	21	TGCAGTTGCTGCCTCAAGCTT	21450.3	1162.41		3041.37	2.61643	777.236	0.668643	1447.06	1.24488		1990.49		6205.97	3.11781	4508.94	2.26525	2316.87	1.16397
osa-miR397b	21	TTATTGAGTGCAGCGTTGATG	13443.4	373.974		558.213	1.49265	527.934	1.41169	485.062	1.29705		2448.29		3701.45	1.51185	2963.25	1.21034	2385.28	0.974264
osa-miR166g-3p	21	TCGGACCAGGCTTCATTCCTC	19875.9	2696.08		392.97	0.145756	5034.07	1.86718	2709.82	1.0051		3340.25		1665.37	0.498578	1594.28	0.477295	2443.07	0.731405
osa-miR393b-3p	21	TCAGTGCAATCCCTTTGGAAT	16857	2209.83		689.504	0.312017	4814.46	2.17866	1852.73	0.838404		2255.19		1406.34	0.623601	1140.05	0.505521	2488.93	1.10365
osa-miR156h-3p	22	GCTCACTTCTCTTTCTGTCAGC	8225.56	1237.75		315.135	0.254604	1003.99	0.811145	526.399	0.425288		1451.39		1051.4	0.724411	1090.51	0.751354	1549	1.06725
osa-miR156f-3p	22	GCTCACTTCTCTTTCTGTCAGC	8225.56	1237.75		315.135	0.254604	1003.99	0.811145	526.399	0.425288		1451.39		1051.4	0.724411	1090.51	0.751354	1549	1.06725
osa-miR156l-3p	22	GCTCACTTCTCTTTCTGTCAGC	7933.22	1174.93		307.911	0.262068	970.628	0.826116	513.855	0.43735		1386.87		999.077	0.720385	1061.08	0.765095	1518.87	1.09518
osa-miR1862d	24	ACTAGGTTTGTTTATTTTGGGACG	13770.2	2716.11		326.512	0.120213	3609.93	1.32908	2728.49	1.00456		1662.21		745.583	0.44855	868.798	0.522678	1112.57	0.669335
osa-miR827	21	TTAGATGACCATCAGCAAACA	2927.47	273.385		60.8598	0.222616	161.68	0.591399	416.786	1.52454		564.862		439.397	0.777884	498.083	0.881779	512.416	0.907154
osa-miR156g-3p	22	GCTCACTTCTCTCTCTGTCAGC	10046.6	1568.52		451.121	0.287609	2043.18	1.30261	1095.99	0.698739		1413.81		879.902	0.622362	1098.48	0.776964	1495.56	1.05782
osa-miR156c-3p	22	GCTCACTTCTCTCTCTGTCAGC	10034.1	1566.02		450.579	0.287723	2040.61	1.30306	1095.42	0.699492		1410.74		878.424	0.622671	1097.72	0.778118	1494.61	1.05945
osa-miR169i-5p.2	22	TGGTGATAAGGGTGTAGCTCTG	17389.5	1945		3135.63	1.61215	2341.06	1.20363	2288.19	1.17645		1366.54		2003.2	1.46589	3183.82	2.32984	1126.03	0.823999
osa-miR169a	21	CAGCCAAGGATGACTTGCCGA	13308.5	1777		1575.13	0.886398	1739.07	0.978651	2254.83	1.2689		994.535		779.563	0.783847	1697.16	1.70649	2491.21	2.5049
osa-miR1871	24	ATGGCTCTGATATCATGTTGGTTT	7939.13	1127.35		450.76	0.399841	1140.74	1.01188	975.826	0.865594		1310.76		982.949	0.749906	1024.07	0.781277	926.67	0.70697
osa-miR162a	21	TCGATAAACCTCTGCATCCAG	12777.1	1821.45		209.668	0.11511	2789.43	1.53143	2206.8	1.21156		1885.79		897.753	0.476063	1208.95	0.641086	1757.26	0.931845
osa-miR159f	21	CTTGGATTGAAGGGAGCTCTA	5647.45	292.167		1027.21	3.51584	869.441	2.97583	579.281	1.9827		375.787		1188.8	3.16349	1022.93	2.7221	291.835	0.776597
osa-miR160f-5p	21	TGCCTGGCTCCCTGAATGCCA	10092.3	569.1		832.714	1.46321	1223.05	2.14909	1015.59	1.78456		1129.49		2335.86	2.06807	2027.64	1.79519	958.886	0.848957
osa-miR399d	21	TGCCAAAGGAGAGTTGCCCTG	272.683	25.669		38.6469	1.50559	45.2777	1.76391	28.6505	1.11615		53.65		35.4571	0.660897	24.6764	0.459952	20.6558	0.38501
osa-miR160c-5p	21	TGCCTGGCTCCCTGTATGCCA	9326.09	758.174		1060.08	1.3982	1037.17	1.36798	1111.24	1.46568		881.09		2209.66	2.50788	1565.81	1.77713	702.867	0.797725
osa-miR160b-5p	21	TGCCTGGCTCCCTGTATGCCA	9326.09	758.174		1060.08	1.3982	1037.17	1.36798	1111.24	1.46568		881.09		2209.66	2.50788	1565.81	1.77713	702.867	0.797725
osa-miR160d-5p	21	TGCCTGGCTCCCTGTATGCCA	9297.67	756.922		1054.66	1.39336	1036.07	1.36879	1108.1	1.46396		880.381		2200.06	2.49899	1560.12	1.77209	701.351	0.796645
osa-miR160a-5p	21	TGCCTGGCTCCCTGTATGCCA	9260.4	753.165		1056.29	1.40246	1030.2	1.36783	1105.39	1.46767		869.509		2200.68	2.53094	1555.56	1.78901	689.602	0.793094
osa-miR435	20	TTATCCGGTATTGGAGTTGA	8031.56	1106.9		830.005	0.749849	857.159	0.774381	913.536	0.825313		873.999		1172.42	1.34145	1083.29	1.23947	1194.25	1.36642
osa-miR399j	21	TGCCAAAGGAGAGTTGCCCTA	206.828	14.3997		35.035	2.43304	34.4623	2.39327	18.1025	1.25714		39.2331		29.1782	0.743714	19.3615	0.493499	17.0553	0.434717
osa-miR166h-3p	21	TCGGACCAGGCTTCATTCCTC	9774.01	1288.87		177.162	0.137454	2692.28	2.08886	1129.2	0.876112		1658.42		828.932	0.499831	838.997	0.5059	1160.14	0.699542
osa-miR444c.1	21	TGTTGTCTCAAGCTTGCTGCC	8203.19	774.034		665.304	0.859528	1179.24	1.52349	1132.76	1.46345		1181.25		1031.58	0.873297	1058.05	0.895704	1180.98	0.999777
osa-miR444b.1	21	TGTTGTCTCAAGCTTGCTGCC	8203.19	774.034		665.304	0.859528	1179.24	1.52349	1132.76	1.46345		1181.25		1031.58	0.873297	1058.05	0.895704	1180.98	0.999777
osa-miR164a	21	TGGAGAAGCAGGGCACGTGCA	6694.94	812.016		347.641	0.428121	922.051	1.13551	830.008	1.02216		1185.74		862.542	0.727431	937.702	0.790818	797.24	0.672358
osa-miR164b	21	TGGAGAAGCAGGGCACGTGCA	6694.94	812.016		347.641	0.428121	922.051	1.13551	830.008	1.02216		1185.74		862.542	0.727431	937.702	0.790818	797.24	0.672358
osa-miR164f	21	TGGAGAAGCAGGGCACGTGCA	6694.94	812.016		347.641	0.428121	922.051	1.13551	830.008	1.02216		1185.74		862.542	0.727431	937.702	0.790818	797.24	0.672358
osa-miR1432-5p	21	ATCAGGAGAGATGACACCGAC	10589.8	975.212		203.348	0.208516	997.025	1.02237	1409.57	1.4454		1694.35		984.795	0.581223	1795.49	1.05969	2530.06	1.49323
osa-miR820b	21	TCGGCCTCGTGGATGGACCAG	7434.58	1193.09		474.418	0.397639	913.986	0.766069	828.155	0.694129		1048.66		998.953	0.952602	942.258	0.898537	1035.07	0.987039
osa-miR820c	21	TCGGCCTCGTGGATGGACCAG	7434.58	1193.09		474.418	0.397639	913.986	0.766069	828.155	0.694129		1048.66		998.953	0.952602	942.258	0.898537	1035.07	0.987039
osa-miR820a	21	TCGGCCTCGTGGATGGACCAG	7434.58	1193.09		474.418	0.397639	913.986	0.766069	828.155	0.694129		1048.66		998.953	0.952602	942.258	0.898537	1035.07	0.987039
osa-miR2873a	24	AAGTTTGGACTTAAATTTGGTAAC	3932.81	535.083		150.253	0.280804	713.994	1.33436	492.902	0.921168		614.494		476.7	0.775761	442.276	0.719741	507.11	0.825249
osa-miR169i-3p	22	TGAGTCGCTCTTATCACTCATG	7706.3	1076.64		1284.74	1.19329	1269.24	1.17889	1375.36	1.27746		553.517		848.261	1.53249	727.573	1.31445	570.973	1.03154
osa-miR160e-5p	21	TGCCTGGCTCCCTGTATGCCG	6260.35	440.546		1250.79	2.83917	438.295	0.99489	764.725	1.73586		484.032		1392.18	2.87622	1084.81	2.2412	404.968	0.836656
osa-miR2871a-3p	21	TATTTTAGTTTCTATGGTCAC	5775.08	699.532		287.685	0.411253	1160.9	1.65954	905.697	1.29472		671.216		821.545	1.22396	657.151	0.979044	571.352	0.851219
osa-miR2871b	21	TATTTTAGTTTCTATGGTCAC	5761.29	699.323		287.323	0.410859	1158.34	1.65637	903.701	1.29225		669.798		818.098	1.22141	655.253	0.978283	569.457	0.850191
osa-miR528-5p	21	TGGAAGGGGCATGCAGAGGAG	4529.58	241.873		406.695	1.68144	531.6	2.19785	262.13	1.08375		596.532		1208.25	2.02546	996.736	1.67088	285.771	0.479054
osa-miR1863a	24	AGCTCTGATACCATGTTAGATTAG	3438.6	749.2		72.0566	0.096178	384.952	0.513817	398.826	0.532335		583.06		306.802	0.526193	326.677	0.56028	617.022	1.05825
osa-miR1862e	24	CTAGATTTGTTTATTTTGGGACGG	4334.47	762.765		115.941	0.152	749.189	0.982202	688.894	0.903153		635.056		384.364	0.605245	434.304	0.683883	563.961	0.88805
osa-miR166m	21	TCGGACCAGGCTTCATTCCCT	4838.98	714.349		120.636	0.168876	1041.57	1.45807	490.906	0.687208		890.543		441.49	0.495753	457.462	0.513688	682.022	0.765849
osa-miR395d	21	GTGAAGTGTTTGGGGGAACTC	6259.46	909.475		264.569	0.290903	741.124	0.814892	738.07	0.811534		1685.84		585.78	0.347471	644.053	0.382037	690.549	0.409617
osa-miR395y	21	GTGAAGTGTTTGGGGGAACTC	6260.55	910.101		264.569	0.290702	741.49	0.814734	737.785	0.810663		1685.84		585.78	0.347471	644.433	0.382262	690.549	0.409617
osa-miR395s	21	GTGAAGTGTTTGGGGGAACTC	6260.55	910.101		264.569	0.290702	741.49	0.814734	737.785	0.810663		1685.84		585.78	0.347471	644.433	0.382262	690.549	0.409617
osa-miR395g	21	GTGAAGTGTTTGGGGGAACTC	6260.55	910.101		264.569	0.290702	741.49	0.814734	737.785	0.810663		1685.84		585.78	0.347471	644.433	0.382262	690.549	0.409617
osa-miR395e	21	GTGAAGTGTTTGGGGGAACTC	6258.05	909.058		264.569	0.291036	741.124	0.815266	737.785	0.811593		1685.13		585.78	0.347617	644.053	0.382198	690.549	0.40979
osa-miR395k	21	GTGAAGTGTTTGGGGGAACTC	6258.81	910.518		264.569	0.290569	741.124	0.813958	737.927	0.810448		1685.37		586.027	0.347714	643.104	0.381581	690.17	0.409507
osa-miR395i	21	GTGAAGTGTTTGGGGGAACTC	6258.81	910.518		264.569	0.290569	741.124	0.813958	737.927	0.810448		1685.37		586.027	0.347714	643.104	0.381581	690.17	0.409507
osa-miR395j	21	GTGAAGTGTTTGGGGGAACTC	6254.4	909.058		264.569	0.291036	741.124	0.815266	736.645	0.810339		1683.95		585.78	0.347861	643.104	0.381902	690.17	0.409852
osa-miR395b	21	GTGAAGTGTTTGGGGGAACTC	6253.59	908.849		264.569	0.291103	740.207	0.814445	737.215	0.811152		1684.19		585.288	0.34752	643.104	0.381849	690.17	0.409795
osa-miR395h	21	GTGAAGTGTTTGGGGGAACTC	6250.84	907.805		264.569	0.291438	740.207	0.815381	736.217	0.810985		1683.48		585.288	0.347666	643.104	0.382009	690.17	0.409967
osa-miR2878-5p	24	TACATGTATAAAATTCTGAGGATG	2977.14	523.814		170.66	0.325803	385.868	0.736651	328.411	0.626961		433.218		337.95	0.780092	328.196	0.757576	469.02	1.08264
osa-miR395r	21	GTGAAGTGTTTGGGGGAACTC	6089.41	861.059		248.857	0.289013	702.629	0.816006	694.453	0.806511		1672.61		581.841	0.347865	640.257	0.38279	687.707	0.411159
osa-miR395q	21	GTGAAGTGTTTGGGGGAACTC	6089.41	861.059		248.857	0.289013	702.629	0.816006	694.453	0.806511		1672.61		581.841	0.347865	640.257	0.38279	687.707	0.411159
osa-miR395n	21	GTGAAGTGTTTGGGGGAACTC	6090.49	861.685		248.857	0.288803	702.995	0.815838	694.168	0.805594		1672.61		581.841	0.347865	640.636	0.383017	687.707	0.411159
osa-miR395l	21	GTGAAGTGTTTGGGGGAACTC	6090.49	861.685		248.857	0.288803	702.995	0.815838	694.168	0.805594		1672.61		581.841	0.347865	640.636	0.383017	687.707	0.411159
osa-miR395p	21	GTGAAGTGTTTGGGGGAACTC	6088	860.641		248.857	0.289153	702.629	0.816401	694.168	0.80657		1671.9		581.841	0.348012	640.257	0.382953	687.707	0.411333
osa-miR395m	21	GTGAAGTGTTTGGGGGAACTC	6084.43	859.389		248.857	0.289574	701.712	0.816524	693.74	0.807248		1671.42		581.348	0.347816	640.257	0.383061	687.707	0.41145
osa-miR169j	21	TAGCCAAGGATGACTTGCCTG	4249.21	486.459		1014.57	2.08563	238.67	0.490628	584.127	1.20077		255.251		400.369	1.56853	852.094	3.33826	417.665	1.63629
osa-miR169i-5p.1	21	TAGCCAAGGATGACTTGCCTG	4249.21	486.459		1014.57	2.08563	238.67	0.490628	584.127	1.20077		255.251		400.369	1.56853	852.094	3.33826	417.665	1.63629
osa-miR169h	21	TAGCCAAGGATGACTTGCCTG	4249.21	486.459		1014.57	2.08563	238.67	0.490628	584.127	1.20077		255.251		400.369	1.56853	852.094	3.33826	417.665	1.63629
osa-miR169l	21	TAGCCAAGGATGACTTGCCTG	4246.78	485.832		1014.57	2.08831	238.67	0.49126	583.414	1.20086		254.542		400.369	1.5729	852.094	3.34755	417.286	1.63936
osa-miR169k	21	TAGCCAAGGATGACTTGCCTG	4246.78	485.832		1014.57	2.08831	238.67	0.49126	583.414	1.20086		254.542		400.369	1.5729	852.094	3.34755	417.286	1.63936
osa-miR169m	21	TAGCCAAGGATGACTTGCCTG	4176.2	476.441		984.051	2.06542	237.02	0.497481	577.143	1.21136		250.761		393.352	1.56863	844.312	3.367	413.117	1.64745
osa-miR1850.1	21	TGGAAAGTTGGGAGATTGGGG	4374.81	510.458		863.776	1.69216	339.124	0.664353	415.503	0.813981		436.291		760.973	1.74419	669.489	1.5345	379.196	0.869135
osa-miR5144-5p	21	TTCTTGTGCTGCTGAAGAGAC	3693.6	861.893		354.143	0.410889	586.593	0.680587	591.112	0.685829		405.566		229.609	0.566145	286.625	0.70673	378.059	0.932176
osa-miR169e	21	TAGCCAAGGATGACTTGCCGG	4969.21	1311		571.396	0.435849	357.455	0.272659	636.867	0.485789		457.562		495.906	1.0838	638.738	1.39596	500.288	1.09338
osa-miR172d-3p	21	AGAATCTTGATGATGCTGCAT	2048.98	115.197		455.997	3.9584	101.737	0.883156	173.186	1.50338		138.261		408.495	2.95452	487.074	3.52285	169.037	1.22259
osa-miR172a	21	AGAATCTTGATGATGCTGCAT	2048.6	115.197		455.997	3.9584	101.737	0.883156	173.186	1.50338		138.261		408.495	2.95452	486.694	3.52011	169.037	1.22259
osa-miR396f-3p	24	ATAGTTCAAGAAAGTCCTTGGAAA	2926.28	574.526		153.323	0.266869	318.227	0.553895	171.333	0.298216		615.676		305.079	0.495518	213.735	0.347156	574.384	0.932933
osa-miR535-5p	21	TGACAACGAGAGAGAGCACGC	1973.89	392.548		24.9218	0.0634873	378.719	0.964773	258.424	0.658326		282.431		128.901	0.456399	159.827	0.565897	348.117	1.23257
osa-miR394	20	TTGGCATTCTGTCCACCTCC	3130.38	262.533		169.757	0.646613	528.117	2.01162	309.881	1.18035		411.475		448.63	1.0903	554.839	1.34842	445.143	1.08182
osa-miR810b.2	21	AAGTGATTTAATTATGCCGTT	2581.49	452.233		103.48	0.228819	326.842	0.72273	441.303	0.97583		340.571		226.654	0.665512	257.963	0.757442	432.446	1.26977
osa-miR810b.1	21	TGAACACCGATATGCGTCATC	3196.04	614.595		92.4636	0.150446	390.268	0.635	425.623	0.692527		563.207		222.345	0.394784	284.158	0.504535	603.378	1.07132
osa-miR444d.3	21	TTGTGGCTTTCTTGCAAGTTG	2232.72	286.95		213.641	0.744525	237.57	0.827915	309.168	1.07743		287.867		301.016	1.04568	312.82	1.08668	283.686	0.985477
osa-miR156b-3p	21	GCTCACTCTCTATCTGTCAGC	2164.58	822.659		115.399	0.140275	320.976	0.390169	238.754	0.290222		147.006		139.243	0.947192	128.507	0.874162	252.039	1.71448
osa-miR396a-5p	21	TTCCACAGCTTTCTTGAACTG	1859.93	196.169		102.216	0.521058	261.217	1.33159	154.085	0.785471		304.175		310.865	1.022	245.815	0.808137	285.392	0.93825
osa-miR396b-5p	21	TTCCACAGCTTTCTTGAACTG	1859.93	196.169		102.216	0.521058	261.217	1.33159	154.085	0.785471		304.175		310.865	1.022	245.815	0.808137	285.392	0.93825
osa-miR7695-3p	21	ACGTGATGTGCCACGTAGGCA	2032.74	170.5		424.393	2.4891	142.249	0.834301	241.605	1.41703		181.748		412.312	2.26858	233.287	1.28357	226.646	1.24703
osa-miR408-3p	21	CTGCACTGCCTCTTCCCTGGC	1562.34	64.9029		31.062	0.478592	216.123	3.32994	84.0984	1.29576		456.616		300.031	0.657074	219.81	0.481388	189.693	0.415431
osa-miR5072	22	CGATTCCCCAGCGGAGTCGCCA	2083.44	133.353		190.525	1.42873	350.856	2.63102	69.2742	0.519478		345.062		274.546	0.795643	166.091	0.481336	553.728	1.60472
osa-miR319b	20	TTGGACTGAAGGGTGCTCCC	1784.22	250.638		302.674	1.20761	192.293	0.767213	282.371	1.12661		188.366		246.599	1.30915	157.549	0.836399	163.731	0.869216
osa-miR5339	21	CAGATAGAGAATCTTCTCAGA	1310.3	204.308		83.2533	0.407488	133.083	0.651384	152.375	0.745808		189.548		134.934	0.711873	151.095	0.797136	261.704	1.38068
osa-miR169g	21	TAGCCAAGGATGACTTGCCTA	1926.78	453.485		279.919	0.617261	161.863	0.356931	310.024	0.683646		174.658		133.333	0.763396	228.921	1.31068	184.576	1.05678
osa-miR169f.1	21	TAGCCAAGGATGACTTGCCTA	1925.99	453.485		279.558	0.616465	161.863	0.356931	309.596	0.682703		174.658		133.333	0.763396	228.921	1.31068	184.576	1.05678
osa-miR5150-3p	24	AGAAGCTGCAGCTGTCAGAAGCTC	1442.52	271.298		92.6442	0.341485	191.376	0.705408	221.934	0.818045		209.873		112.896	0.537926	155.082	0.738929	187.419	0.893008
osa-miR444f	21	TGCAGTTGTTGCCTCAAGCTT	1840.59	66.3637		74.4043	1.12116	56.8262	0.856284	84.526	1.27368		288.812		622.222	2.15442	397.479	1.37626	249.955	0.865458
osa-miR156j-3p	22	GCTCGCTCCTCTTTCTGTCAGC	1790.4	369.383		98.4231	0.266453	717.66	1.94286	358.915	0.97166		87.6836		42.4746	0.484408	43.6582	0.497906	72.2007	0.823423
osa-miR398b	21	TGTGTTCTCAGGTCGCCCCTG	2436.28	182.187		156.935	0.861396	463.592	2.54459	287.217	1.5765		352.625		303.109	0.859578	269.352	0.763849	421.265	1.19466
osa-miR1423-5p	24	AGGCAACTACACGTTGGGCGCTCG	1636.39	242.29		56.1644	0.231806	209.524	0.864764	239.181	0.98717		285.031		163.496	0.57361	180.517	0.633325	260.188	0.912842
osa-miR319a-3p.2-3p	20	TTGGACTGAAGGGTGCTCCC	1456.64	210.152		277.933	1.32253	159.663	0.759753	237.899	1.13203		133.298		196.245	1.47223	127.748	0.958362	113.702	0.852991
osa-miR1883a	24	ACCTGTGACGGGCCGAGAATGGAA	1417.6	334.323		60.1374	0.179878	174.328	0.521437	178.745	0.534647		211.291		121.022	0.572772	147.109	0.696238	190.64	0.902262
osa-miR399b	21	TGCCAAAGGAGAATTGCCCTG	148.65	26.7124		5.2372	0.196059	19.4309	0.727411	28.2228	1.05654		24.5798		10.711	0.435764	14.9956	0.610078	18.7608	0.763261
osa-miR399a	21	TGCCAAAGGAGAATTGCCCTG	148.65	26.7124		5.2372	0.196059	19.4309	0.727411	28.2228	1.05654		24.5798		10.711	0.435764	14.9956	0.610078	18.7608	0.763261
osa-miR399c	21	TGCCAAAGGAGAATTGCCCTG	148.65	26.7124		5.2372	0.196059	19.4309	0.727411	28.2228	1.05654		24.5798		10.711	0.435764	14.9956	0.610078	18.7608	0.763261
osa-miR167h-3p	21	AGGTCATGCTGTAGTTTCATC	1530.45	368.757		27.6307	0.0749293	276.432	0.749632	66.4234	0.180128		451.889		158.202	0.350091	83.1404	0.183984	97.9731	0.216808
osa-miR159d	21	ATTGGATTGAAGGGAGCTCCG	678.937	68.0332		100.229	1.47324	123.368	1.81335	70.8422	1.04129		67.358		99.2305	1.47318	101.553	1.50766	48.3233	0.71741
osa-miR2090	22	AACTCTGATTCTAGAATTTTTG	861.508	115.197		29.4366	0.255532	136.2	1.18231	131.849	1.14455		114.863		117.944	1.02682	105.159	0.915519	110.859	0.965143
osa-miR159c	21	ATTGGATTGAAGGGAGCTCCA	650.268	65.3202		89.5741	1.37131	121.352	1.85779	68.9892	1.05617		64.0492		95.6602	1.49354	98.8953	1.54405	46.4283	0.724885
osa-miR5147	21	ACAACTCTTGTGGATGGAGGG	877.367	109.563		164.881	1.5049	71.8577	0.655859	95.5015	0.871661		98.319		142.444	1.44879	109.525	1.11398	85.2764	0.867344
osa-miR159e	21	ATTGGATTGAAGGGAGCTCCT	648.879	65.3202		89.5741	1.37131	120.435	1.84376	68.9892	1.05617		63.5765		95.6602	1.50465	98.8953	1.55553	46.4283	0.730275
osa-miR2878-3p	24	CAGGATTTTATACATGTAAAGAAT	913.919	179.057		33.2291	0.185579	104.853	0.585588	96.7844	0.540523		171.113		79.5322	0.464794	92.6313	0.541346	156.719	0.915881
osa-miR1320-3p	21	TGTAAAATTCATTCGTTCCAA	1063.23	88.0676		57.248	0.650046	204.758	2.32501	195.707	2.22223		115.808		65.9895	0.569816	138.567	1.19652	197.083	1.7018
osa-miR1876	24	ATAAGTGGGTTTGTGGGCTGGCCC	999.185	241.664		41.8976	0.173371	182.76	0.756258	251.297	1.03986		112.972		57.6177	0.510016	70.0429	0.620001	40.9327	0.362325
osa-miR535-3p	21	GTGCTTTCTCCCGTTGTCACT	945.571	146.918		31.6038	0.215111	258.651	1.76051	113.889	0.775186		135.661		80.394	0.592608	78.9644	0.58207	99.4891	0.733363
osa-miR166j-5p	21	GAATGACGTCCGGTCTGAAGA	1064.8	224.551		86.6846	0.386035	75.5239	0.336332	76.9714	0.342779		275.341		138.381	0.502581	71.5615	0.259902	115.786	0.420521
osa-miR7695-5p	24	TGCCTATGTGGCACGCCACGTGAA	1380.47	71.9984		324.887	4.51241	86.5225	1.20173	100.348	1.39375		102.1		256.079	2.50811	242.208	2.37225	196.325	1.92286
osa-miR159a.2	21	TTGCATGCCCCAGGAGCTGCA	1038.36	87.2328		85.9622	0.985434	77.9069	0.893092	111.894	1.2827		112.972		182.949	1.61941	262.329	2.32206	117.113	1.03665
osa-miR169r-5p	21	TAGCCAAGGATGATTTGCCTG	1965.83	314.08		245.065	0.780262	193.942	0.617494	400.821	1.27618		195.693		199.569	1.01981	195.133	0.99714	221.529	1.13203
osa-miR1425-3p	21	CAGCAAGAACTGGATCTTAAT	948.438	146.918		33.2291	0.226174	85.4226	0.581429	123.297	0.839219		175.131		89.7507	0.512478	121.863	0.695842	172.827	0.986844
osa-miR1862b	24	ACGAGGTTGGTTTATTTTGGGACG	880.803	150.257		18.9623	0.126199	198.892	1.32367	147.956	0.984684		147.242		62.9117	0.427267	82.1913	0.558205	72.3902	0.49164
osa-miR1862c	24	ACGAGGTTGGTTTATTTTGGGACG	880.803	150.257		18.9623	0.126199	198.892	1.32367	147.956	0.984684		147.242		62.9117	0.427267	82.1913	0.558205	72.3902	0.49164
osa-miR1862a	24	ACGAGGTTGGTTTATTTTGGGACG	880.803	150.257		18.9623	0.126199	198.892	1.32367	147.956	0.984684		147.242		62.9117	0.427267	82.1913	0.558205	72.3902	0.49164
osa-miR162b	21	TCGATAAGCCTCTGCATCCAG	643.237	69.0767		38.1051	0.551635	91.8385	1.32951	78.3968	1.13492		95.4829		111.788	1.17077	74.5986	0.781277	83.9499	0.879214
osa-miR3980a-5p	21	AATCGACGGCCTCAGTCAGGG	733.693	165.492		114.677	0.692943	268.183	1.62052	185.302	1.1197		0.01		0.01	1	0.01	1	0.01	1
osa-miR3980b-5p	21	AATCGACGGCCTCAGTCAGGG	733.693	165.492		114.677	0.692943	268.183	1.62052	185.302	1.1197		0.01		0.01	1	0.01	1	0.01	1
osa-miR166i-3p	21	TCGGATCAGGCTTCATTCCTC	989.334	145.875		18.2399	0.125038	259.567	1.77938	110.896	0.760212		191.202		76.5774	0.400505	76.3069	0.39909	110.67	0.578811
osa-miR2864.2	21	TTGTTTTGCATTGTATAGGTA	716.506	90.9892		88.6711	0.974523	127.767	1.4042	80.3923	0.883537		87.9199		111.788	1.27148	69.6633	0.79235	59.3145	0.674642
osa-miR1878	24	ACTTAATCTGGACACTATAAAAGA	818.717	165.909		10.4744	0.0631333	123.918	0.746901	170.335	1.02667		105.646		51.0926	0.483622	80.4829	0.761819	110.859	1.04935
osa-miR1883b	24	ACCTGTGACGGGCCGAGAATGGAA	819.303	202.43		22.7547	0.112408	82.123	0.405686	76.2587	0.376716		131.643		72.1453	0.548035	111.613	0.847844	120.335	0.914094
osa-miR166i-5p	21	AATGCAGTTTGATCCAAGATC	793.106	77.8417		25.4636	0.32712	48.0273	0.616987	67.9914	0.873457		178.203		83.4718	0.468408	111.044	0.62313	201.063	1.12828
osa-miR1857-3p	21	TCATGCTCCAAGAAAACCAGG	794.759	102.467		13.5445	0.132184	223.822	2.18433	131.992	1.28814		106.355		54.0474	0.508181	76.8764	0.72283	85.6554	0.805375
osa-miR169o	21	TAGCCAAGAATGACTTGCCTA	891.256	163.405		82.1698	0.50286	68.7414	0.420681	174.754	1.06945		96.901		79.7784	0.823298	113.322	1.16946	112.186	1.15774
osa-miR169n	21	TAGCCAAGAATGACTTGCCTA	891.01	163.405		82.1698	0.50286	68.7414	0.420681	174.754	1.06945		96.901		79.5322	0.820757	113.322	1.16946	112.186	1.15774
osa-miR164d	21	TGGAGAAGCAGGGCACGTGCT	471.635	47.9989		52.9137	1.10239	59.7592	1.24501	57.7285	1.2027		56.2498		74.2382	1.31979	83.1404	1.47806	39.6062	0.704113
osa-miR5082	24	TGCGATGATGGCCGCGCGGGTTCA	386.596	32.5558		54.7197	1.6808	43.9945	1.35136	42.6193	1.30912		68.3034		67.9594	0.994964	44.6073	0.653076	31.8365	0.466104
osa-miR1882b	24	AGATTGCTTTCAAGGTCATTTCTT	681.268	0.01		0.01	1	0.9166	91.66	0.01	1		193.093		119.298	0.617828	177.48	0.919143	190.451	0.986316
osa-miR1882f	24	AGATTGCTTTCAAGGTCATTTCTT	681.268	0.01		0.01	1	0.9166	91.66	0.01	1		193.093		119.298	0.617828	177.48	0.919143	190.451	0.986316
osa-miR1882a	24	AGATTGCTTTCAAGGTCATTTCTT	681.268	0.01		0.01	1	0.9166	91.66	0.01	1		193.093		119.298	0.617828	177.48	0.919143	190.451	0.986316
osa-miR1882d	24	AGATTGCTTTCAAGGTCATTTCTT	681.268	0.01		0.01	1	0.9166	91.66	0.01	1		193.093		119.298	0.617828	177.48	0.919143	190.451	0.986316
osa-miR1882e-5p	24	AGATTGCTTTCAAGGTCATTTCTT	681.268	0.01		0.01	1	0.9166	91.66	0.01	1		193.093		119.298	0.617828	177.48	0.919143	190.451	0.986316
osa-miR1882c	24	AGATTGCTTTCAAGGTCATTTCTT	681.268	0.01		0.01	1	0.9166	91.66	0.01	1		193.093		119.298	0.617828	177.48	0.919143	190.451	0.986316
osa-miR1882g	24	AGATTGCTTTCAAGGTCATTTCTT	681.268	0.01		0.01	1	0.9166	91.66	0.01	1		193.093		119.298	0.617828	177.48	0.919143	190.451	0.986316
osa-miR399k	21	TGCCAAAGGAAATTTGCCCCG	259.252	58.4334		9.3908	0.160709	21.4473	0.367038	57.8711	0.990377		32.6154		15.02	0.460519	26.1949	0.803145	38.2796	1.17367
osa-miR1882h	24	AGATTGCTTTCAAGGTCATTTCTT	603.155	0.01		0.01	1	0.3666	36.66	0.01	1		165.913		105.14	0.633704	159.257	0.959883	172.448	1.03938
osa-miR166d-5p	21	GGAATGTTGTCTGGCTCGAGG	451.373	66.5724		18.7817	0.282124	91.1052	1.36851	27.0825	0.406813		94.0648		62.5423	0.664885	43.848	0.466147	47.3758	0.503651
osa-miR1849	21	TATCGTATCCTAGGTTGGTTT	625.24	108.519		23.8383	0.219669	114.936	1.05913	88.232	0.813054		93.5922		45.1831	0.482766	57.3251	0.612499	93.6145	1.00024
osa-miR530-5p	20	TGCATTTGCACCTGCACCTA	413.158	41.1121		13.9057	0.338239	65.2585	1.58733	47.4657	1.15454		54.3591		74.6076	1.3725	56.7556	1.04409	59.6935	1.09813
osa-miR1860-3p	22	ATCTGGAAGCTAGGTTTTCTCT	675.888	128.136		25.1024	0.195904	92.9384	0.725309	118.45	0.92441		96.4283		48.1379	0.499209	73.2698	0.759837	93.425	0.968855
osa-miR2877	24	TTGCATCCTCTGCACTTTGGGCCT	325.562	22.7473		40.9946	1.80217	68.5581	3.0139	53.3098	2.34357		23.6344		55.4017	2.34411	51.6306	2.18455	9.2857	0.392889
osa-miR1437b-3p	24	GTGCTGGCGAGCTCCGGTGCCGCA	552.13	79.0938		132.916	1.68049	38.4952	0.486703	65.2831	0.825388		42.0692		61.3112	1.45739	71.9411	1.71007	61.02	1.45047
osa-miR5827	21	TTTGTTGCAATTTGGACTACC	421.92	49.6684		20.7682	0.418137	44.3611	0.893145	63.145	1.27133		47.7415		84.703	1.7742	63.0197	1.32002	48.5128	1.01616
osa-miR167e-3p	21	AGATCATGTTGCAGCTTCACT	589.131	83.059		5.4178	0.0652283	134.733	1.62214	42.6193	0.513121		152.678		30.5325	0.19998	29.0422	0.190219	111.049	0.727339
osa-miR167i-3p	21	AGATCATGTTGCAGCTTCACT	589.131	83.059		5.4178	0.0652283	134.733	1.62214	42.6193	0.513121		152.678		30.5325	0.19998	29.0422	0.190219	111.049	0.727339
osa-miR396e-3p	24	ATGGTTCAAGAAAGCCCATGGAAA	587.804	99.9629		12.0997	0.121042	48.9439	0.489621	39.4835	0.394982		164.732		33.3641	0.202536	56.7556	0.344534	132.463	0.804112
osa-miR5508	21	TAGATGGCTGATCTGGTGTGG	351.554	35.2688		31.6038	0.896084	50.4103	1.42932	36.7752	1.04271		35.4516		58.8489	1.65998	63.7789	1.79904	39.4166	1.11184
osa-miR1870-3p	24	TTTAGGGCTAATTCAGCATGAACA	555.2	131.475		13.3639	0.101646	63.792	0.485201	74.8333	0.569181		89.5743		34.8415	0.388968	45.936	0.512826	101.384	1.13184
osa-miR5150-5p	24	AGCTTCTGACAGCTGCAGTTTCTC	404.653	59.6856		16.7951	0.281393	68.0081	1.13944	66.4234	1.11289		53.8864		36.6882	0.680843	45.936	0.85246	57.2299	1.06205
osa-miR812h	24	AAGACGGATGATTAAAGTTGGACA	475.611	2.2956		0.903	0.393361	1.0999	0.479134	4.4187	1.92486		158.587		67.4669	0.425426	103.261	0.651133	137.579	0.867534
osa-miR812j	24	AAGACGGATGATTAAAGTTGGACA	475.611	2.2956		0.903	0.393361	1.0999	0.479134	4.4187	1.92486		158.587		67.4669	0.425426	103.261	0.651133	137.579	0.867534
osa-miR812i	24	AAGACGGATGATTAAAGTTGGACA	475.611	2.2956		0.903	0.393361	1.0999	0.479134	4.4187	1.92486		158.587		67.4669	0.425426	103.261	0.651133	137.579	0.867534
osa-miR530-3p	21	AGGTGCAGAGGCAGATGCAAC	364.053	56.3465		27.9919	0.496782	22.5472	0.400153	24.9444	0.442697		49.6322		55.8941	1.12617	65.4873	1.31945	61.2095	1.23326
osa-miR1873	24	TCAACATGGTATCAGAGCTGGAAG	499.716	91.4066		4.6954	0.0513683	60.6757	0.6638	75.8311	0.829602		93.1195		33.4872	0.359615	47.6444	0.511648	92.8565	0.997176
osa-miR1320-5p	21	TGGAACGGAGGAATTTTATAG	403.099	25.0429		10.655	0.42547	110.719	4.42119	90.3701	3.60861		24.3434		28.932	1.18849	55.6167	2.28467	57.4194	2.35873
osa-miR2863c	24	TTAGTAGGACTAGAATGGGCCAAA	290.985	47.5815		27.8113	0.584498	30.0629	0.631819	40.3387	0.847781		30.252		34.7184	1.14764	36.6349	1.21099	43.5857	1.44075
osa-miR1437a	22	TCCGGCGCCGCACTAGGCACTG	374.732	60.103		20.9488	0.348548	62.8755	1.04613	52.5971	0.875116		47.5051		45.1831	0.951121	32.0793	0.675281	53.4399	1.12493
osa-miR818b	22	AATCCCTTATATTATGGGACGG	285.001	34.2253		22.7547	0.66485	19.0643	0.557024	24.0892	0.703842		44.1963		53.8012	1.21732	46.8851	1.06084	39.9852	0.904718
osa-miR818d	22	AATCCCTTATATTATGGGACGG	285.001	34.2253		22.7547	0.66485	19.0643	0.557024	24.0892	0.703842		44.1963		53.8012	1.21732	46.8851	1.06084	39.9852	0.904718
osa-miR818e	22	AATCCCTTATATTATGGGACGG	285.001	34.2253		22.7547	0.66485	19.0643	0.557024	24.0892	0.703842		44.1963		53.8012	1.21732	46.8851	1.06084	39.9852	0.904718
osa-miR2869	21	TCCCGACATTAAATTCTGGGC	309.704	51.338		20.2264	0.393985	37.5786	0.731984	51.0292	0.993985		31.1974		35.4571	1.13654	39.1026	1.25339	43.7752	1.40317
osa-miR166c-5p	20	GGAATGTTGTCTGGTCCGAG	319.209	36.1035		19.3234	0.535222	73.6908	2.0411	42.0492	1.16468		39.4694		45.7987	1.16036	28.8524	0.731007	33.9211	0.859428
osa-miR1863c	24	TAGAAACTTGGCTGATGCATTACT	276.694	50.5032		5.9596	0.118004	68.0081	1.34661	49.4612	0.979368		41.3602		15.5125	0.375059	17.8429	0.431403	28.0465	0.678104
osa-miR2864.1	21	TTTTGCTGCCCTTGTTTTGCA	369.397	47.5815		15.531	0.326408	64.5252	1.3561	65.5682	1.37802		52.232		33.1179	0.634054	41.9498	0.803144	48.8918	0.936051
osa-miR5542	21	TTTGAGAAGGTATCATGAGAT	387.768	122.919		24.1994	0.196873	94.2215	0.766534	146.388	1.19093		0.01		0.01	1	0.01	1	0.01	1
osa-miR2871a-5p	24	GACCGTAGAAACTAGCATAGAAAA	351.311	68.2419		8.3073	0.121733	66.725	0.977772	48.3209	0.708083		54.5954		30.04	0.55023	22.5884	0.413742	52.4924	0.96148
osa-miR1879	24	GTGTTTGGTTTAGGGATGAGGTGG	257.965	31.3036		35.035	1.1192	28.5964	0.913518	27.6527	0.883371		35.2152		39.2736	1.11525	35.1164	0.997194	25.7724	0.731854
osa-miR390-5p	21	AAGCTCAGGAGGGATAGCGCC	331.073	44.2425		4.1536	0.0938826	47.4774	1.07312	52.7396	1.19206		56.4862		31.148	0.551427	44.4175	0.786343	50.4078	0.892391
osa-miR1423-3p	21	AGCGCCCAAGCGGTAGTTGTC	275.601	36.1035		10.4744	0.290121	31.3461	0.868229	44.0447	1.21996		40.8875		33.8566	0.828043	32.8386	0.803145	46.0493	1.12624
osa-miR166b-5p	21	GGAATGTTGTCTGGCTCGGGG	248.811	26.2951		29.2561	1.11261	50.227	1.91013	22.5213	0.856483		26.9432		40.2585	1.4942	36.0655	1.33858	17.2448	0.640043
osa-miR2863b	21	TTCGTTTATTTGGACTAGAGT	253.611	35.2688		17.8787	0.506927	39.0451	1.10707	36.4901	1.03463		32.1428		31.148	0.969051	29.4218	0.915347	32.2155	1.00226
osa-miR1856	21	TATGCGTAAGACGGATTCGTA	215.772	30.2602		7.4043	0.244688	17.5978	0.581549	23.0914	0.763095		43.2509		23.638	0.546532	20.88	0.482765	49.6498	1.14795
osa-miR396c-3p	21	GGTCAAGAAAGCTGTGGGAAG	288.577	47.9989		8.4879	0.176835	45.461	0.947126	28.2228	0.587988		72.7939		17.3592	0.238471	19.3615	0.265977	48.8918	0.671647
osa-miR812g	24	AAGACGGATGATTAAAGTTGGACA	283.006	2.2956		0.5418	0.236017	0.7332	0.319394	3.706	1.61439		93.5922		41.6128	0.444618	61.6909	0.659146	78.8333	0.842306
osa-miR395a	21	GTGAAGTGCTTGGGGGAACTC	406.563	27.7559		52.7331	1.89989	15.948	0.574581	28.2228	1.01682		88.1562		74.6076	0.846311	79.344	0.900039	39.7957	0.451423
osa-miR2876-3p	21	TTCCTATATGAACACTGTTGC	154.654	12.7301		7.9461	0.624198	25.2968	1.98716	19.9555	1.56758		13.2353		35.0877	2.65107	23.3476	1.76404	17.0553	1.28862
osa-miR5513	21	TAACAAAGGACAACAGACTGA	237.61	38.3991		7.9461	0.206935	33.5458	0.873609	36.4901	0.950285		33.3245		16.9898	0.509829	24.4866	0.734793	46.4283	1.39322
osa-miR1432-3p	21	CAGGTGTCATCTCCCCTGAAC	227.301	15.6518		15.8922	1.01536	35.9288	2.29551	20.2406	1.29318		31.4337		47.2761	1.50399	28.2829	0.899764	32.5945	1.03693
osa-miR1870-5p	24	TGCTGAATTAGACCTAGTGGGCAT	268.298	46.9555		6.1402	0.130766	42.1614	0.897901	40.6238	0.865155		38.7604		24.623	0.635262	32.8386	0.84722	36.1951	0.933816
osa-miR1863b.2	23	AGAGACTTGGCTGATGCATTACT	204.881	41.1121		5.4178	0.131781	58.476	1.42235	36.7752	0.89451		23.6344		8.7412	0.369851	14.9956	0.634482	15.7288	0.665505
osa-miR812p	24	GACGGACGATTAAAGTTGGGCATG	157.95	1.6695		0.01	0.00598982	0.9166	0.549027	0.2851	0.17077		61.4494		25.731	0.418735	27.7135	0.450997	40.1747	0.653785
osa-miR2874	24	ATGTGAACAGTGTCAAACAGTGTC	198.171	30.4689		10.2938	0.337846	18.5143	0.607646	28.0803	0.921605		29.0703		23.5149	0.808898	30.5607	1.05127	27.6675	0.951745
osa-miR7694-5p	24	AACCTAGTACTGGATTAGTCACCA	214.238	42.9903		5.2372	0.121823	30.2462	0.703559	29.9333	0.69628		38.9967		13.1733	0.337806	18.792	0.481887	34.8686	0.894142
osa-miR818c	22	AATCCCTTATATTATGGGACGG	141.896	21.0778		6.5013	0.308443	12.4651	0.591385	13.6838	0.649204		26.7069		22.7762	0.852821	15.7549	0.589919	22.9299	0.858576
osa-miR818a	22	AATCCCTTATATTATGGGACGG	139.453	20.243		6.5013	0.321163	11.9152	0.588608	13.6838	0.675977		25.5251		22.8994	0.897133	15.7549	0.617232	22.9299	0.898328
osa-miR1846d-5p	22	TCCCACCGAGCAGCCGGATCTC	264.116	39.6513		8.4879	0.214064	34.4623	0.869134	37.773	0.95263		45.378		25.3616	0.558896	26.0051	0.573077	46.9968	1.03567
osa-miR5811	24	CCTAACCTAGGAGTTCGATGGGAC	106.716	13.1475		51.2884	3.901	5.6826	0.432219	15.6794	1.19258		2.1271		6.6482	3.12548	9.1113	4.28344	3.032	1.42541
osa-miR2118o	22	CTCCTGATGCCTCCCAAGCCTA	198.879	27.3385		10.655	0.389743	72.5909	2.65526	36.6327	1.33997		13.7079		13.2964	0.969981	13.4771	0.983163	11.1807	0.815639
osa-miR5151	22	TAATGATGTGGGTACGAATGAA	188.233	29.008		14.628	0.504275	18.6977	0.64457	18.2451	0.628968		29.543		29.1782	0.987652	24.6764	0.835271	24.2564	0.821054
osa-miR156l-5p	21	CGACAGAAGAGAGTGAGCATA	106.867	22.1212		1.0836	0.0489847	18.5143	0.836948	16.3921	0.741013		12.0535		7.8793	0.653694	11.3891	0.944879	17.4343	1.44641
osa-miR5814	24	AATCAAGTTAGGAACCATGCAAGT	157.028	27.3385		1.9865	0.0726631	30.7961	1.12647	37.3454	1.36604		19.3802		10.2185	0.527265	12.528	0.646433	17.4343	0.899593
osa-miR2905	21	TACATGTCAGTGACAAAGGCA	140.318	19.6169		8.6685	0.441889	9.8988	0.504606	15.8219	0.806544		21.98		17.113	0.778571	19.5513	0.889504	27.6675	1.25876
osa-miR5804	21	TGCGAAGTAGAGATGCCGACT	167.922	27.7559		27.9919	1.0085	14.6648	0.528349	22.6638	0.81654		18.6712		22.0376	1.1803	15.9447	0.853973	18.1923	0.974351
osa-miR166a-5p	21	GGAATGTTGTCTGGTTCAAGG	179.818	40.9034		7.9461	0.194265	17.5978	0.430228	11.9733	0.292721		42.5419		23.3918	0.549853	16.1345	0.379261	19.3293	0.454359
osa-miR166e-5p	21	GGAATGTTGTCTGGTTCAAGG	172.075	39.6513		6.8625	0.173071	16.3146	0.411452	10.5479	0.266016		41.3602		23.3918	0.565563	15.5651	0.37633	18.3818	0.444432
osa-miR1431	21	TTTGCGAGTTGGCCCGCTTGC	158.463	22.7473		12.4609	0.547797	16.6812	0.733327	28.9355	1.27204		13.9443		22.53	1.61571	24.8662	1.78325	16.2973	1.16874
osa-miR812r	24	ACGTTAGACACGAATTTCTACGGC	140.434	25.0429		9.9326	0.396623	13.1983	0.527028	17.8174	0.711475		21.5073		10.8341	0.503741	19.1716	0.8914	22.9299	1.06614
osa-miR169r-3p	21	TGGCAAGTCTCCTCGGCTACC	302.031	39.0252		11.7385	0.300793	96.6046	2.47544	68.7041	1.76051		34.2699		14.8969	0.434693	17.0836	0.498502	19.7083	0.575091
osa-miR3981-3p	21	AGTATTAGGATACGTCTCATC	161.254	22.5386		10.8356	0.480757	21.6306	0.959714	24.8019	1.10042		18.1985		9.9723	0.547974	15.9447	0.876155	37.3321	2.05138
osa-miR7694-3p	22	CCATATTCGTAGTGCTAGGTGG	130.127	23.7908		4.1536	0.174588	23.4637	0.986251	20.8108	0.874741		17.7258		12.6808	0.715387	14.0465	0.792432	13.4547	0.759046
osa-miR408-5p	21	CAGGGATGAGGCAGAGCATGG	115.973	6.8868		1.2642	0.183569	15.5814	2.2625	7.9822	1.15906		25.9978		12.5577	0.483029	19.5513	0.752037	26.1514	1.00591
osa-miR439e	21	TGTCGAACCGCGGTTGTTCGA	61.5452	0.6261		0.903	1.44226	0.5499	0.878294	0.01	0.0159719		3.7815		26.839	7.09745	18.792	4.96946	10.0437	2.65601
osa-miR439b	21	TGTCGAACCGCGGTTGTTCGA	61.5452	0.6261		0.903	1.44226	0.5499	0.878294	0.01	0.0159719		3.7815		26.839	7.09745	18.792	4.96946	10.0437	2.65601
osa-miR439h	21	TGTCGAACCGCGGTTGTTCGA	61.5452	0.6261		0.903	1.44226	0.5499	0.878294	0.01	0.0159719		3.7815		26.839	7.09745	18.792	4.96946	10.0437	2.65601
osa-miR439c	21	TGTCGAACCGCGGTTGTTCGA	61.5452	0.6261		0.903	1.44226	0.5499	0.878294	0.01	0.0159719		3.7815		26.839	7.09745	18.792	4.96946	10.0437	2.65601
osa-miR439g	21	TGTCGAACCGCGGTTGTTCGA	61.5452	0.6261		0.903	1.44226	0.5499	0.878294	0.01	0.0159719		3.7815		26.839	7.09745	18.792	4.96946	10.0437	2.65601
osa-miR439a	21	TGTCGAACCGCGGTTGTTCGA	61.5452	0.6261		0.903	1.44226	0.5499	0.878294	0.01	0.0159719		3.7815		26.839	7.09745	18.792	4.96946	10.0437	2.65601
osa-miR439f	21	TGTCGAACCGCGGTTGTTCGA	61.5452	0.6261		0.903	1.44226	0.5499	0.878294	0.01	0.0159719		3.7815		26.839	7.09745	18.792	4.96946	10.0437	2.65601
osa-miR439d	21	TGTCGAACCGCGGTTGTTCGA	56.1428	0.6261		0.5418	0.865357	0.5499	0.878294	0.01	0.0159719		3.7815		23.8843	6.31609	17.6531	4.66828	9.0961	2.40542
osa-miR5813	22	AAGCAGCGACTCTGGTCATGGA	95.0489	13.9823		5.5984	0.400392	11.5486	0.825944	12.2584	0.876708		14.1806		11.6959	0.824782	7.4029	0.522044	18.3818	1.29626
osa-miR1428e-3p	21	TAAGATAATGCCATGAATTTG	173.019	8.1389		2.8895	0.355023	10.4487	1.2838	4.1336	0.507882		35.2152		38.7812	1.10126	44.7971	1.2721	28.615	0.812575
osa-miR1860-5p	21	AGAAAACCAGCTTCCAGATCT	152.472	26.9211		1.8059	0.0670812	30.0629	1.1167	30.3609	1.12777		22.689		9.7261	0.42867	10.44	0.460135	20.4663	0.902036
osa-miR166g-5p	21	AATGGAGGCTGATCCAAGATC	98.9897	11.8954		5.0566	0.425089	10.8153	0.9092	9.1225	0.766893		17.0168		8.8643	0.520915	14.2364	0.836609	21.9824	1.29181
osa-miR5160	22	CGAGATCGATGGTATATTTCTG	111.473	15.4431		10.8356	0.701647	7.1491	0.462932	12.2584	0.793778		10.8718		19.8215	1.8232	21.0698	1.93802	14.0232	1.28987
osa-miR5144-3p	21	TCTCCTCAGCAGCACAAGAAG	121.332	30.8863		4.3342	0.140328	27.1299	0.87838	22.0936	0.71532		11.3445		6.7713	0.59688	7.0233	0.619093	11.7492	1.03567
osa-miR2275d	22	CTTGTTTTTCTCCAATATCTCA	143.502	18.1561		2.7089	0.149201	33.5458	1.84763	27.5101	1.5152		15.835		12.5577	0.793034	15.5651	0.982955	17.6238	1.11296
osa-miR1864	24	TTGTAGTAACGTGATGGTCAATGT	105.883	10.4345		12.4609	1.1942	14.8481	1.42298	17.2473	1.65291		6.854		22.4069	3.26917	17.0836	2.4925	4.5481	0.663569
osa-miR1865-5p	24	TGCTAGTGATGGTGATTCTTCGAC	50.9653	3.5477		9.752	2.74882	4.2161	1.1884	8.4098	2.37049		2.3634		10.3416	4.37573	10.2502	4.33706	2.0845	0.881992
osa-miR5083	20	AGACTACAATTATCTGATCA	85.0986	18.1561		3.7925	0.208883	15.5814	0.858191	11.4032	0.628064		11.1082		8.3718	0.753659	5.5047	0.495553	11.1807	1.00653
osa-miR399i	21	TGCCAAAGGAGAGCTGCCCTG	0.08	0.01		0.01	1	0.01	1	0.01	1		0.01		0.01	1	0.01	1	0.01	1
osa-miR2863a	21	TTGTCCCATTCTAGTTTAGCT	119.329	12.3128		3.2507	0.26401	32.2626	2.62025	20.3832	1.65545		14.8897		9.1105	0.611866	12.3382	0.82864	14.7812	0.992713
osa-miR166e-3p	21	TCGAACCAGGCTTCATTCCCC	113.48	14.8171		3.0701	0.2072	25.2968	1.70727	14.6816	0.990855		17.0168		10.3416	0.607729	12.1484	0.713906	16.1078	0.946582
osa-miR440	24	AGTGTCTCCTGATGATCGGGACAA	77.3266	8.1389		7.2237	0.887552	4.7661	0.585595	10.1203	1.24345		9.4538		8.9874	0.950665	12.9076	1.36533	15.7288	1.66375
osa-miR444a-3p.1	21	TTGCTGCCTCAAGCTTGCTGC	106.676	4.3825		24.5606	5.60424	5.1327	1.17118	12.5435	2.86218		6.1449		26.5928	4.32762	18.2225	2.96547	9.0961	1.48027
osa-miR444d.1	21	TTGCTGCCTCAAGCTTGCTGC	106.676	4.3825		24.5606	5.60424	5.1327	1.17118	12.5435	2.86218		6.1449		26.5928	4.32762	18.2225	2.96547	9.0961	1.48027
osa-miR5145	24	ACCTGTTTGGATTCTTGAGGGCTA	54.5744	7.7216		16.9757	2.19847	3.6662	0.474798	9.1225	1.18143		2.5998		4.4321	1.70478	7.7825	2.9935	2.274	0.874683
osa-miR1847.1	21	TGCAGTTTGCAGTTGTGGCAC	82.213	6.4694		10.1132	1.56324	7.1491	1.10506	9.2651	1.43214		8.9811		15.3894	1.71353	12.528	1.39493	12.3177	1.37151
osa-miR1846d-3p	20	TATCCGGCGCCGCAGGGAGG	83.4452	5.426		4.876	0.898636	14.8481	2.73647	6.9844	1.28721		8.9811		17.4823	1.94657	13.4771	1.50061	11.3702	1.26601
osa-miR169f.2	21	TGAGGACAAGAGCTGATTCGG	100.581	17.53		9.0296	0.515094	15.0314	0.857467	16.107	0.918825		12.2899		11.819	0.961684	7.9724	0.648695	10.8017	0.878909
osa-miR1857-5p	21	TGGTTTTTTTGGAGCATGAGG	80.7013	8.5563		3.2507	0.379919	13.565	1.58538	10.4054	1.21611		9.9264		15.2662	1.53794	13.8567	1.39594	5.8746	0.591816
osa-miR1868	24	TCACGGAAAACGAGGGAGCAGCCA	104.599	12.1041		2.1671	0.179039	14.8481	1.2267	15.1092	1.24827		26.9432		10.0954	0.374692	13.6669	0.507249	9.6647	0.358706
osa-miR1861h	22	CGGTCTTGAGGCAGGAACTGAG	172.068	4.1738		0.7224	0.17308	9.5321	2.28379	10.2629	2.45889		52.941		13.2964	0.251155	19.5513	0.369304	61.5885	1.16334
osa-miR1861j	22	CGGTCTTGAGGCAGGAACTGAG	172.068	4.1738		0.7224	0.17308	9.5321	2.28379	10.2629	2.45889		52.941		13.2964	0.251155	19.5513	0.369304	61.5885	1.16334
osa-miR2880	24	ACGGTATCCCGTTCGGACAGGATG	60.1901	6.8868		8.4879	1.23249	5.4993	0.798528	6.5568	0.952082		7.3267		8.7412	1.19306	9.1113	1.24357	7.5801	1.03459
osa-miR3980a-3p	21	CTGGCCGAGGCCGTCGATTCT	102.959	21.2865		9.3908	0.441162	60.1258	2.8246	12.1159	0.569182		0.01		0.01	1	0.01	1	0.01	1
osa-miR3980b-3p	21	CTGGCCGAGGCCGTCGATTCT	102.959	21.2865		9.3908	0.441162	60.1258	2.8246	12.1159	0.569182		0.01		0.01	1	0.01	1	0.01	1
osa-miR1428e-5p	22	AATTCACAGGCCCTATCTTGTG	111.573	5.6347		5.0566	0.897404	4.2161	0.748239	2.5657	0.455339		28.8339		22.7762	0.78991	24.8662	0.862395	17.6238	0.611218
osa-miR1428g-5p	22	AATTCACAGGCCCTATCTTGTG	111.573	5.6347		5.0566	0.897404	4.2161	0.748239	2.5657	0.455339		28.8339		22.7762	0.78991	24.8662	0.862395	17.6238	0.611218
osa-miR1428f-5p	22	AATTCACAGGCCCTATCTTGTG	111.573	5.6347		5.0566	0.897404	4.2161	0.748239	2.5657	0.455339		28.8339		22.7762	0.78991	24.8662	0.862395	17.6238	0.611218
osa-miR5512a	21	TAGGATATGGTAATGCTAAAA	84.5727	15.6518		2.3477	0.149996	8.9822	0.573876	11.9733	0.764979		15.835		6.6482	0.419842	9.1113	0.57539	14.0232	0.885583
osa-miR5512b	21	TAGGATATGGTAATGCTAAAA	84.5727	15.6518		2.3477	0.149996	8.9822	0.573876	11.9733	0.764979		15.835		6.6482	0.419842	9.1113	0.57539	14.0232	0.885583
osa-miR444a-5p	21	GCTAGAGGTGGCAACTGCATA	69.8676	0.01		0.01	1	0.01	1	0.01	1		17.4894		19.329	1.10518	21.4495	1.22643	11.5597	0.660955
osa-miR171i-3p	21	GGATTGAGCCGCGTCAATATC	92.9516	17.1127		3.4313	0.200512	19.0643	1.11404	15.1092	0.882923		8.5084		6.402	0.752433	8.9215	1.04855	14.4022	1.6927
osa-miR1429-3p	21	GTTGCACGGGTTTGTATGTTG	63.8656	9.5998		8.1267	0.846549	4.7661	0.496479	9.1225	0.95028		7.0903		9.603	1.35439	10.8196	1.52597	4.7376	0.66818
osa-miR160b-3p	21	GCGTGCAAGGAGCCAAGCATG	93.3766	14.6084		4.3342	0.296692	12.0985	0.828188	10.2629	0.702534		12.7626		12.1884	0.955009	13.6669	1.07086	13.4547	1.05423
osa-miR160a-3p	21	GCGTGCAAGGAGCCAAGCATG	93.3766	14.6084		4.3342	0.296692	12.0985	0.828188	10.2629	0.702534		12.7626		12.1884	0.955009	13.6669	1.07086	13.4547	1.05423
osa-miR171a	21	TGATTGAGCCGCGCCAATATC	57.212	5.6347		14.2668	2.53195	1.8331	0.325323	4.9889	0.885389		5.1996		11.819	2.27306	9.1113	1.75231	4.3586	0.838257
osa-miR1851	21	CGTCTGGGATGGCATTTTGGC	90.036	18.3648		5.5984	0.304844	15.2148	0.828476	14.9667	0.814967		8.9811		10.2185	1.13778	9.3011	1.03563	7.3906	0.822906
osa-miR6248	21	TATTTGAGGATGGAGGTAGTA	80.8581	14.6084		3.6119	0.247248	17.7811	1.21718	12.1159	0.829379		9.9264		4.8015	0.48371	6.0742	0.611924	11.9387	1.20272
osa-miR1859	22	TTTCCTATGACGTCCATTCCAA	95.1897	8.765		1.2642	0.144233	13.9316	1.58946	12.9711	1.47987		20.0892		7.6331	0.37996	15.3753	0.765352	15.1602	0.754644
osa-miR2876-5p	21	AATTGCTGGCAGCACTGTTTA	87.8095	9.8085		0.903	0.092063	10.0821	1.02789	16.5346	1.68574		17.2531		8.0025	0.46383	13.0975	0.759139	12.1282	0.702958
osa-miR5143a	24	TGTGGTATGTTGGCAATGTAGGAA	61.4488	14.8171		2.3477	0.158445	5.8659	0.395887	13.5413	0.913897		12.5262		3.8166	0.304689	3.7964	0.303077	4.7376	0.378215
osa-miR2865	22	CTCAGCAGTCGACTGTACCGTG	58.1168	0.01		0.01	1	0.01	1	0.01	1		9.4538		18.4672	1.95342	14.9956	1.5862	15.1602	1.60361
osa-miR5805	24	ACGAGTGATGGCGGCGTATACCTG	40.0804	0.8348		3.4313	4.11033	1.2832	1.53713	2.4232	2.90273		6.1449		12.6808	2.06363	10.2502	1.66808	3.032	0.493417
osa-miR3982-3p	21	AGTTGCCTACATGGAGCGCCA	47.1707	2.713		12.4609	4.59303	2.0164	0.743236	5.7016	2.10158		2.5998		9.7261	3.7411	8.5418	3.28556	3.4111	1.31206
osa-miR2875	24	ATTTACAGTCATATACAGTTTATA	29.0654	5.426		1.2642	0.232989	3.4829	0.641891	4.7038	0.8669		2.5998		3.8166	1.46804	1.5185	0.584083	6.2536	2.40542
osa-miR810a	21	TCATAAGCCCACCACATGTGG	64.149	9.3911		3.973	0.42306	10.2654	1.0931	9.2651	0.986583		7.7993		9.2336	1.1839	5.3149	0.681459	8.9066	1.14197
osa-miR2103	22	TTTCCCTCTCCGTGCGCGCTCG	53.5725	0.01		0.01	1	0.01	1	0.01	1		20.5619		15.1431	0.736464	8.5418	0.415419	9.2857	0.451597
osa-miR5143b	24	TGTGGTATGTTGGCAATGTAGGAA	49.4258	11.478		1.6253	0.141601	5.4993	0.479117	10.4054	0.906552		10.8718		2.3392	0.215162	3.4167	0.314272	3.7901	0.348618
osa-miR164e	21	TGGAGAAGCAGGGCACGTGAG	45.6199	5.426		1.2642	0.232989	7.8823	1.45269	6.2717	1.15586		8.272		4.5552	0.550677	5.8844	0.711364	6.0641	0.733088
osa-miR1881	24	AATGTTATTGTAGCGTGGTGGTGT	80.4894	4.1738		12.2803	2.94223	14.4815	3.46962	5.8441	1.40019		6.3813		13.4195	2.10294	18.9818	2.9746	4.9271	0.772115
osa-miR5493	21	AGCCGGGCTCGGTCGCGCGTG	30.5294	0.6261		3.6119	5.76889	5.6826	9.07619	5.1314	8.19582		3.5452		5.2939	1.49326	3.4167	0.963754	3.2216	0.908722
osa-miR1874-3p	24	TATGGATGGAGGTGTAACCCGATG	77.4004	11.8954		1.0836	0.091094	8.0657	0.678052	8.2673	0.695		8.7447		23.0225	2.63274	14.4262	1.64971	1.895	0.216703
osa-miR1863b	24	AGCTCTGATACCATGTTAACTGTT	60.9028	14.6084		0.3612	0.0247255	10.9986	0.752896	13.5413	0.926953		8.272		0.9849	0.119064	4.9353	0.596627	7.2011	0.870539
osa-miR528-3p	21	CCTGTGCTTGCCTCTTCCATT	53.5348	6.8868		0.5418	0.0786722	6.9658	1.01147	3.9911	0.579529		12.0535		10.9572	0.909047	6.264	0.519683	5.8746	0.487377
osa-miR2879	24	GCCAGATGTGTTAAAATAATGACC	43.1007	9.3911		2.5283	0.269223	3.8495	0.409909	5.274	0.561596		6.3813		4.6784	0.733142	4.176	0.654412	6.8221	1.06908
osa-miR1875	24	ACAATGGAGTGAAGTGCAACAGAA	46.7407	7.3042		3.973	0.543934	7.3324	1.00386	7.5546	1.03428		4.7269		5.4171	1.14602	5.8844	1.24488	4.5481	0.962174
osa-miR172d-5p	20	GCAGCACCATCAAGATTCAC	63.2261	3.3391		1.0836	0.324519	16.8646	5.05064	6.6994	2.00635		11.3445		9.4798	0.83563	7.7825	0.686015	6.6326	0.584653
osa-miR812t	24	ACGGAAAATCATGGCTGCACTTAA	58.2092	6.052		0.7224	0.119365	7.1491	1.18128	6.4143	1.05986		13.9443		5.9095	0.423793	8.9215	0.639795	9.0961	0.652317
osa-miR812u	24	ACGGAAAATCATGGCTGCACTTAA	58.2092	6.052		0.7224	0.119365	7.1491	1.18128	6.4143	1.05986		13.9443		5.9095	0.423793	8.9215	0.639795	9.0961	0.652317
osa-miR2870	21	TAATCAGTTTGGGGAGACAAA	46.9715	4.7999		1.6253	0.338611	5.4993	1.14571	7.8397	1.6333		5.9086		7.2638	1.22936	7.0233	1.18866	7.0116	1.18668
osa-miR812n-3p	24	ACGGAAAATCATGGCTGCACTTAA	56.9404	6.052		0.7224	0.119365	6.5992	1.09042	6.4143	1.05986		13.4716		5.6633	0.420388	8.9215	0.662245	9.0961	0.675206
osa-miR1846a-3p	21	TGACCCCGTTCTCCTCGCCGG	44.1214	2.9217		2.8895	0.988979	7.5157	2.57237	7.8397	2.68327		7.3267		4.0628	0.55452	3.4167	0.466335	8.1486	1.11218
osa-miR167a-3p	22	ATCATGCATGACAGCCTCATTT	73.6882	3.5477		1.0836	0.305437	3.8495	1.08507	18.8152	5.30349		6.1449		12.9271	2.10371	19.1716	3.11992	8.1486	1.32608
osa-miR172b	21	GGAATCTTGATGATGCTGCAT	25.5385	0.8348		5.9596	7.13896	1.2832	1.53713	2.2806	2.73191		1.6544		7.2638	4.39059	5.1251	3.09786	1.137	0.687258
osa-miR5540	21	TTGTGCGAGATCGACGGTATA	46.6809	9.8085		1.9865	0.202528	7.3324	0.747556	6.1292	0.624887		6.854		3.5703	0.520907	5.3149	0.775445	5.6851	0.829457
osa-miR171e-5p	21	TGTTGGCTCGGCTCACTCAGA	53.3323	8.5563		1.6253	0.189954	6.9658	0.814114	7.127	0.832953		7.563		4.4321	0.586024	4.5556	0.602354	12.5072	1.65374
osa-miR5501	21	TCTTGTGGCTAGAAGGGTGAG	42.4045	6.6781		2.7089	0.405639	7.5157	1.12542	6.4143	0.960498		4.7269		4.309	0.911591	4.7455	1.00393	5.3061	1.12253
osa-miR390-3p	20	CGCTATCTATCCTGAGCTCC	40.725	6.052		1.8059	0.298397	11.7319	1.93852	6.6994	1.10697		3.7815		3.4472	0.911596	3.6065	0.953722	3.6006	0.952162
osa-miR5802	24	ATGGACTGTACTTTGTAAAGCGGA	36.0829	9.8085		0.7224	0.0736504	2.383	0.242953	5.7016	0.581292		4.9632		2.8316	0.570519	4.7455	0.956137	4.9271	0.992726
osa-miR1846b-3p	21	TGACCCCGTTCTCCTCGCCGG	42.4975	2.9217		2.3477	0.803539	7.5157	2.57237	7.127	2.43933		7.3267		3.6934	0.504101	3.4167	0.466335	8.1486	1.11218
osa-miR5831	24	TAGTCAAACTTAGAATAGTTGGAC	31.9124	5.426		3.0701	0.565813	2.933	0.540546	4.4187	0.814357		3.5452		4.5552	1.28489	3.0371	0.856679	4.9271	1.38979
osa-miR2055	21	TTTCCTTGGGAAGGTGGTTTC	36.6853	2.713		7.7655	2.86233	5.1327	1.89189	7.6971	2.83712		2.8361		5.4171	1.91005	4.3658	1.53937	0.758	0.267268
osa-miR812n-5p	24	AAGTGCAGCCATGAGTTTCCGTGC	43.6417	0.01		0.01	1	0.01	1	0.01	1		14.6533		9.603	0.655347	9.6807	0.66065	9.6647	0.659558
osa-miR2873c	21	CAAATGAAGTTGAGTTTGGAC	26.3863	4.7999		3.0701	0.639617	3.1163	0.649243	2.2806	0.475135		3.0725		2.4623	0.8014	2.6575	0.864931	4.9271	1.60361
osa-miR5828	21	TTACGGCATTAAAAGTAAATC	35.4904	3.7564		0.3612	0.0961559	3.1163	0.829597	5.7016	1.51784		6.3813		2.7085	0.424443	6.264	0.981618	7.2011	1.12847
osa-miR5821	21	TGGACGGAGCGATGGTGGGCG	36.6392	2.2956		8.6685	3.77614	2.5663	1.11792	1.7105	0.745121		3.0725		7.51	2.44426	8.5418	2.78008	2.274	0.740114
osa-miR171h	21	GTGAGCCGAACCAATATCACT	49.4349	7.9303		1.9865	0.250495	9.3488	1.17887	10.5479	1.33008		4.9632		2.7085	0.545716	6.6436	1.33857	5.3061	1.06909
osa-miR812l	24	ACGAACGGTTAAAGTTGGACGCGG	36.3005	5.6347		1.4447	0.256393	2.383	0.422915	5.8441	1.03716		8.0357		2.3392	0.291101	4.176	0.519681	6.4431	0.801809
osa-miR812k	24	ACGAACGGTTAAAGTTGGACGCGG	36.3005	5.6347		1.4447	0.256393	2.383	0.422915	5.8441	1.03716		8.0357		2.3392	0.291101	4.176	0.519681	6.4431	0.801809
osa-miR812m	24	ACGAACGGTTAAAGTTGGACGCGG	36.3005	5.6347		1.4447	0.256393	2.383	0.422915	5.8441	1.03716		8.0357		2.3392	0.291101	4.176	0.519681	6.4431	0.801809
osa-miR1846e	20	CAACGAGGAGGCCGGGACCA	51.6348	6.6781		3.4313	0.513814	2.933	0.439197	6.5568	0.981836		8.0357		7.8793	0.980537	7.7825	0.968491	8.3381	1.03763
osa-miR5510	21	AGGCTGATCCACTCCAGAGGA	34.6702	5.0086		0.01	0.00199657	4.3994	0.878369	2.5657	0.512259		9.9264		2.7085	0.272858	4.7455	0.478069	5.3061	0.534544
osa-miR3982-5p	21	GCGCTCCACGTAGGCAACAAT	53.3362	6.052		0.903	0.149207	10.0821	1.66591	4.7038	0.777231		9.4538		6.402	0.677188	6.4538	0.682667	9.2857	0.982219
osa-miR5809	20	TCGTCGCCGGCGACCACAGC	34.3869	3.1304		3.6119	1.15381	4.0328	1.28827	1.5679	0.500863		4.2542		6.0326	1.41803	4.7455	1.11549	7.0116	1.64816
osa-miR812f	24	ACGGATGATTAAAGTTGGACACGG	34.4448	2.5043		0.3612	0.144232	2.933	1.17119	4.1336	1.6506		7.563		4.4321	0.586024	6.264	0.828243	6.2536	0.826868
osa-miR1865-3p	24	CGAAGAATCGCAGTCACTAGTTGT	20.1439	2.0869		0.3612	0.17308	1.8331	0.878384	1.4254	0.683023		2.8361		3.4472	1.21547	3.2269	1.13779	4.9271	1.73728
osa-miR167d-3p	22	GATCATGCTGTGCAGTTTCATC	33.138	7.5129		0.3612	0.0480773	3.1163	0.414793	4.1336	0.5502		5.1996		5.4171	1.04183	3.9862	0.766636	3.4111	0.656031
osa-miR160f-3p	21	GCATTGAGGGAGTCATGCAGG	21.5689	1.0435		2.3477	2.24983	0.7332	0.702635	1.5679	1.50254		1.6544		4.9246	2.97667	7.2131	4.35995	2.0845	1.25997
osa-miR815c	21	AAGGGGATTGAGGAGATTGGG	29.2599	5.2173		0.903	0.173078	3.1163	0.597301	4.2762	0.819619		7.3267		1.9698	0.268852	4.5556	0.621781	1.895	0.258643
osa-miR815b	21	AAGGGGATTGAGGAGATTGGG	29.2599	5.2173		0.903	0.173078	3.1163	0.597301	4.2762	0.819619		7.3267		1.9698	0.268852	4.5556	0.621781	1.895	0.258643
osa-miR2867-3p	20	CCAGGACGTGTGGGATGGCA	30.7044	6.6781		4.1536	0.621973	5.6826	0.850931	4.9889	0.747054		1.4181		2.093	1.47592	3.0371	2.14167	2.653	1.87081
osa-miR529b	21	AGAAGAGAGAGAGTACAGCTT	27.2603	3.9651		0.5418	0.136642	5.316	1.3407	5.274	1.33011		5.9086		2.4623	0.416732	1.5185	0.256998	2.274	0.384863
osa-miR1428a-5p	21	CGTTTTGCAAATTCGCAGGCC	36.8887	1.8782		0.7224	0.384624	0.9166	0.48802	3.2784	1.7455		4.0178		6.1557	1.53211	13.0975	3.25987	6.8221	1.69797
osa-miR812s	24	AAGACGGACAATCAAACGTTGGAC	28.825	7.0955		0.7224	0.101811	2.0164	0.28418	3.706	0.522303		4.4905		2.8316	0.630576	2.088	0.464982	5.8746	1.30823
osa-miR437	21	AAAGTTAGAGAAGTTTGACTT	20.1744	4.7999		0.7224	0.150503	2.0164	0.420092	1.9956	0.415759		2.1271		3.201	1.50487	3.6065	1.6955	1.7055	0.801796
osa-miR5156	24	AGCCTGTAAAACTGCAAAAAGGAA	28.8483	1.0435		0.01	0.00958313	1.2832	1.22971	0.2851	0.273215		8.0357		5.2939	0.658798	6.4538	0.803141	6.4431	0.801809
osa-miR5807	24	AGGAGGTCTGGAGAGTTATGTGGC	20.7285	4.7999		0.01	0.00208338	3.1163	0.649243	2.2806	0.475135		3.5452		1.4774	0.416732	2.088	0.588965	3.4111	0.962174
osa-miR812a	22	GACGGACGGTTAAACGTTGGAC	30.1444	3.9651		2.3477	0.592091	1.6498	0.41608	3.2784	0.826814		6.1449		2.7085	0.440772	3.7964	0.617813	6.2536	1.01769
osa-miR812c	22	GACGGACGGTTAAACGTTGGAC	30.1444	3.9651		2.3477	0.592091	1.6498	0.41608	3.2784	0.826814		6.1449		2.7085	0.440772	3.7964	0.617813	6.2536	1.01769
osa-miR812e	22	GACGGACGGTTAAACGTTGGAC	30.1444	3.9651		2.3477	0.592091	1.6498	0.41608	3.2784	0.826814		6.1449		2.7085	0.440772	3.7964	0.617813	6.2536	1.01769
osa-miR812d	22	GACGGACGGTTAAACGTTGGAC	30.1444	3.9651		2.3477	0.592091	1.6498	0.41608	3.2784	0.826814		6.1449		2.7085	0.440772	3.7964	0.617813	6.2536	1.01769
osa-miR812b	22	GACGGACGGTTAAACGTTGGAC	30.1444	3.9651		2.3477	0.592091	1.6498	0.41608	3.2784	0.826814		6.1449		2.7085	0.440772	3.7964	0.617813	6.2536	1.01769
osa-miR2866	20	TCTAGTTTGTGTTCAGCATC	30.7387	5.6347		0.01	0.00177472	5.4993	0.97597	3.706	0.65771		5.9086		2.5854	0.437566	2.4676	0.417629	4.9271	0.833886
osa-miR399e	21	TGCCAAAGGAGATTTGCCCAG	3.612	0.8348		0.01	0.0119789	0.01	0.0119789	0.2851	0.341519		0.4727		0.8618	1.82314	0.3796	0.803046	0.758	1.60355
osa-miR399f	21	TGCCAAAGGAGATTTGCCCAG	3.612	0.8348		0.01	0.0119789	0.01	0.0119789	0.2851	0.341519		0.4727		0.8618	1.82314	0.3796	0.803046	0.758	1.60355
osa-miR399g	21	TGCCAAAGGAGATTTGCCCAG	3.612	0.8348		0.01	0.0119789	0.01	0.0119789	0.2851	0.341519		0.4727		0.8618	1.82314	0.3796	0.803046	0.758	1.60355
osa-miR2275b	22	TTTGGTTTCCTCCAATATCTCA	24.6425	3.3391		1.0836	0.324519	4.7661	1.42736	4.9889	1.49409		3.3088		1.8467	0.558118	1.8982	0.573682	3.4111	1.03092
osa-miR2275a	22	TTTGGTTTCCTCCAATATCTCA	24.6425	3.3391		1.0836	0.324519	4.7661	1.42736	4.9889	1.49409		3.3088		1.8467	0.558118	1.8982	0.573682	3.4111	1.03092
osa-miR2275c	23	AGAATTGGAGGAAAACAAACTGA	21.0843	1.0435		0.5418	0.519214	3.4829	3.33771	1.4254	1.36598		5.4359		2.7085	0.498262	1.8982	0.349197	4.5481	0.836678
osa-miR812v	24	ATGGCTGCACTTAAAATGGGACGG	27.2587	6.6781		0.01	0.00149743	3.4829	0.521541	6.1292	0.917806		3.3088		2.3392	0.706963	2.6575	0.803161	2.653	0.801801
osa-miR5159	24	AACTAGAGTGGGTCAACGGGTACC	21.688	5.2173		1.0836	0.207694	2.1997	0.421617	3.706	0.710329		2.5998		2.7085	1.04181	2.4676	0.94915	1.7055	0.656012
osa-miR815a	21	AAGGGGATTGAGGAGATTGGG	19.806	5.8433		1.8059	0.309055	2.1997	0.376448	3.8486	0.658635		2.5998		1.6005	0.615624	1.8982	0.730133	0.01	0.00384645
osa-miR6246	23	TTGGGGATTTCCTGCCGGAGGAA	25.7395	5.426		0.7224	0.133137	2.383	0.439182	2.7083	0.499134		4.2542		4.5552	1.07075	3.2269	0.758521	2.4635	0.579075
osa-miR2873b	21	TTGGACTTGAGATTTGGTATG	20.8158	2.713		3.0701	1.13163	3.4829	1.28378	1.9956	0.735569		3.5452		2.2161	0.625099	1.7084	0.481891	2.0845	0.587978
osa-miR166l-5p	21	GGATTGTTGTCTGGTTCAAGG	20.8731	2.9217		0.3612	0.123627	2.383	0.815621	3.706	1.26844		2.8361		2.2161	0.78139	3.6065	1.27164	2.8425	1.00226
osa-miR164c	21	TGGAGAAGCAGGGTACGTGCA	18.1132	2.9217		1.8059	0.618099	1.8331	0.627409	2.7083	0.92696		3.0725		1.6005	0.520911	1.3287	0.432449	2.8425	0.925142
osa-miR1848	21	CCTCGCCGGCGCGCGCGTGCA	15.8747	2.5043		4.876	1.94705	3.1163	1.24438	2.4232	0.967616		0.4727		1.7236	3.64629	0.3796	0.803046	0.379	0.801777
osa-miR812q	24	ACGTTGGGTACGAATATCTACGGC	18.0847	0.01		0.01	1	0.01	1	0.01	1		6.1449		1.8467	0.300526	5.6945	0.926703	4.3586	0.709304
osa-miR1846b-5p	21	AGTGAGGAGGCCGGGGCCGCT	14.3269	0.6261		0.5418	0.865357	1.0999	1.75675	3.2784	5.23622		1.6544		2.9548	1.78603	1.5185	0.917855	2.653	1.6036
osa-miR1846a-5p	21	AGTGAGGAGGCCGGGGCCGCT	14.3269	0.6261		0.5418	0.865357	1.0999	1.75675	3.2784	5.23622		1.6544		2.9548	1.78603	1.5185	0.917855	2.653	1.6036
osa-miR1861k	22	CGGTCTTGTGGCAAGAACTGAG	27.6436	0.8348		0.01	0.0119789	4.5828	5.4897	1.4254	1.70747		9.2174		2.093	0.227071	3.0371	0.329496	6.4431	0.699015
osa-miR1861m	22	CGGTCTTGTGGCAAGAACTGAG	27.6436	0.8348		0.01	0.0119789	4.5828	5.4897	1.4254	1.70747		9.2174		2.093	0.227071	3.0371	0.329496	6.4431	0.699015
osa-miR1861e	22	CGGTCTTGTGGCAAGAACTGAG	27.6436	0.8348		0.01	0.0119789	4.5828	5.4897	1.4254	1.70747		9.2174		2.093	0.227071	3.0371	0.329496	6.4431	0.699015
osa-miR171d-5p	21	TGTTGGCCCGGCTCACTCAGA	20.0326	3.3391		0.5418	0.162259	3.8495	1.15286	3.2784	0.981821		3.3088		1.3543	0.409302	1.3287	0.401566	3.032	0.916344
osa-miR5833	21	TCCTCCTCGGGCTCATCGGGC	15.4074	1.6695		1.6253	0.973525	2.0164	1.20779	3.421	2.04912		2.1271		2.4623	1.15759	0.7593	0.356965	1.3265	0.623619
osa-miR5536	22	AATGGTAGTGACATTATGGTAG	18.6935	1.8782		1.2642	0.673091	1.0999	0.585614	2.8508	1.51784		0.9454		3.4472	3.64629	3.9862	4.21642	3.2216	3.40766
osa-miR5504	21	AGTGACGGGAGGACTGCAAGG	10.5463	1.0435		1.9865	1.90369	3.6662	3.51337	0.7127	0.68299		0.01		1.2311	123.11	0.7593	75.93	1.137	113.7
osa-miR7693-5p	24	GTTTCCGCTCTTCATCGATGGCTG	16.0192	0.6261		1.9865	3.17282	2.1997	3.51334	2.5657	4.09791		1.6544		3.9397	2.38135	3.0371	1.83577	0.01	0.00604449
osa-miR2106	21	CCGAGGTTTTCTGGATACATT	8.8199	0.6261		1.2642	2.01917	2.5663	4.09887	1.5679	2.50423		0.4727		0.6156	1.30231	0.9491	2.00783	0.758	1.60355
osa-miR166h-5p	21	GGAATGTTGGCTGGCTCGAGG	15.1827	3.9651		0.903	0.227737	2.0164	0.508537	1.1403	0.287584		2.8361		1.4774	0.520927	1.1389	0.401573	1.7055	0.601354
osa-miR3979-5p	20	TCTCTCTCTCCCTTGAAGGC	17.5475	1.4608		0.903	0.618154	5.316	3.6391	2.1381	1.46365		1.8908		1.4774	0.781362	1.7084	0.903533	2.653	1.40311
osa-miR1869	24	TGAGAACAATAGGCATGGGAGGTA	12.0081	2.9217		0.7224	0.247253	2.1997	0.752884	0.5702	0.19516		0.01		1.6005	160.05	2.4676	246.76	1.516	151.6
osa-miR7693-3p	22	GACGTCCATCGATGAAGAGCGA	13.4419	3.7564		0.3612	0.0961559	1.2832	0.341604	2.8508	0.758918		1.1817		1.3543	1.14606	0.7593	0.642549	1.895	1.60362
osa-miR156k	21	TGACAGAAGAGAGAGAGCACA	12.5616	2.5043		0.01	0.00399313	0.9166	0.36601	1.4254	0.569181		3.3088		0.9849	0.297661	0.3796	0.114724	3.032	0.916344
osa-miR2121a	24	AAAACGGAGCGGTCCATTAGCGCG	13.7955	1.6695		0.3612	0.216352	1.4665	0.878407	0.7127	0.426894		2.5998		3.5703	1.3733	2.6575	1.02219	0.758	0.291561
osa-miR2121b	24	AAAACGGAGCGGTCCATTAGCGCG	13.7955	1.6695		0.3612	0.216352	1.4665	0.878407	0.7127	0.426894		2.5998		3.5703	1.3733	2.6575	1.02219	0.758	0.291561
osa-miR1850.3	22	CTGTTTAGTTCACATCAATCTT	16.4917	1.8782		0.01	0.00532425	2.5663	1.36636	3.8486	2.04909		3.5452		1.2311	0.347258	0.7593	0.214177	2.653	0.748336
osa-miR1437b-5p	21	GGGAGGAAACAGTGCCTAGTG	10.3083	0.4174		0.903	2.16339	0.3666	0.878294	2.8508	6.8299		0.709		2.2161	3.12567	1.7084	2.40959	1.137	1.60367
osa-miR1846c-5p	21	AGTGAGGAGGCCGGGGCCGCT	11.5966	0.6261		0.01	0.0159719	1.0999	1.75675	2.8508	4.55327		0.9454		2.4623	2.60451	0.9491	1.00391	2.653	2.80622
osa-miR812o-3p	24	GAACGGTCAAATGTTAGACACGGA	11.2195	2.9217		2.7089	0.927166	0.7332	0.25095	2.4232	0.82938		1.1817		0.8618	0.729288	0.01	0.00846238	0.379	0.320724
osa-miR2100-3p	22	AACCGCTGTTTAGGCGGAGTGG	6.9795	0.6261		4.3342	6.92254	0.01	0.0159719	0.2851	0.455359		0.4727		0.8618	1.82314	0.3796	0.803046	0.01	0.0211551
osa-miR6249b	21	CGTGAAGAGCTCGCCGGCGGC	11.2579	1.2521		3.4313	2.74044	0.01	0.00798658	2.1381	1.70761		0.4727		1.108	2.34398	1.8982	4.01565	0.9475	2.00444
osa-miR6249a	21	CGTGAAGAGCTCGCCGGCGGC	11.2579	1.2521		3.4313	2.74044	0.01	0.00798658	2.1381	1.70761		0.4727		1.108	2.34398	1.8982	4.01565	0.9475	2.00444
osa-miR1861g	22	CAGTCTTGTGGCAAGAACTGAG	16.2203	0.01		0.01	1	0.7332	73.32	0.7127	71.27		5.4359		1.3543	0.24914	3.0371	0.558712	4.9271	0.9064
osa-miR395c	21	GTGAAGTGTTTGGAGGAACTC	14.7368	2.713		1.6253	0.599079	1.8331	0.675673	1.7105	0.630483		2.8361		0.9849	0.347273	1.1389	0.401573	1.895	0.668171
osa-miR395o	21	ATGAAGTGTTTGGAGGAACTC	14.7368	2.713		1.6253	0.599079	1.8331	0.675673	1.7105	0.630483		2.8361		0.9849	0.347273	1.1389	0.401573	1.895	0.668171
osa-miR2118b	22	TTCCCGATGCCTCCCATTCCTA	9.745	1.4608		0.01	0.00684556	2.383	1.6313	3.2784	2.24425		1.4181		0.2462	0.173613	0.5695	0.401594	0.379	0.267259
osa-miR2118n	22	TTCCCGATGCCTCCCATTCCTA	9.745	1.4608		0.01	0.00684556	2.383	1.6313	3.2784	2.24425		1.4181		0.2462	0.173613	0.5695	0.401594	0.379	0.267259
osa-miR7692-3p	24	TGACTTGGCATGCTTACGTGGCAC	13.9347	1.2521		0.01	0.00798658	3.6662	2.92804	2.9933	2.39062		2.1271		1.2311	0.578769	1.1389	0.535424	1.516	0.712707
osa-miR1319b	24	CCTTTAATATATTATAGGTGTCGG	6.8405	1.2521		0.01	0.00798658	2.7497	2.19607	0.9978	0.796901		0.01		0.8618	86.18	0.9491	94.91	0.01	1
osa-miR1861b	22	CGATCTTGAGGCAGGAACTGAG	12.7089	0.4174		0.01	0.0239578	0.01	0.0239578	0.8552	2.04887		5.6723		0.2462	0.0434039	1.3287	0.234244	4.1691	0.734993
osa-miR1861i	22	CGATCTTGAGGCAGGAACTGAG	12.7089	0.4174		0.01	0.0239578	0.01	0.0239578	0.8552	2.04887		5.6723		0.2462	0.0434039	1.3287	0.234244	4.1691	0.734993
osa-miR1861f	22	CGATCTTGAGGCAGGAACTGAG	12.7089	0.4174		0.01	0.0239578	0.01	0.0239578	0.8552	2.04887		5.6723		0.2462	0.0434039	1.3287	0.234244	4.1691	0.734993
osa-miR1861l	22	CGATCTTGAGGCAGGAACTGAG	12.7089	0.4174		0.01	0.0239578	0.01	0.0239578	0.8552	2.04887		5.6723		0.2462	0.0434039	1.3287	0.234244	4.1691	0.734993
osa-miR5076	22	GAAATGGGAGCAGAGCAGGTTT	3.1969	0.6261		0.3612	0.576905	0.01	0.0159719	0.01	0.0159719		0.01		1.2311	123.11	0.5695	56.95	0.379	37.9
osa-miR5812	24	AGCAACGATTTTAAGATTGTGGCA	6.3608	1.8782		1.6253	0.86535	0.7332	0.390374	0.2851	0.151794		0.01		0.4925	49.25	0.01	1	1.3265	132.65
osa-miR5823	24	AAGGAATTGGGTCTAATCTCTTCC	5.974	0.8348		0.903	1.0817	0.5499	0.658721	1.1403	1.36596		1.4181		0.3693	0.260419	0.3796	0.267682	0.379	0.267259
osa-miR5161	20	TCTGGATCAGAGGGAGTATA	15.4274	2.2956		0.01	0.00435616	2.383	1.03807	3.421	1.49024		3.5452		0.7387	0.208366	1.1389	0.321251	1.895	0.534526
osa-miR5826	24	TAGCCCAAAGTGAGAAGAGTGGGT	5.9032	1.0435		0.5418	0.519214	0.5499	0.526977	1.4254	1.36598		0.01		0.2462	24.62	1.1389	113.89	0.9475	94.75
osa-miR6254	21	TGCTCCGGATATTATGGCATG	8.3824	0.4174		0.01	0.0239578	1.0999	2.63512	0.9978	2.39051		0.4727		1.9698	4.16713	2.2778	4.8187	1.137	2.40533
osa-miR5073	23	GTTTGGTGAATCGGAAACTATTT	5.8188	0.8348		1.0836	1.29804	0.3666	0.439147	0.01	0.0119789		0.709		1.108	1.56276	0.7593	1.07094	0.9475	1.33639
osa-miR171c-5p	21	GGATATTGGTGCGGTTCAATC	5.9316	0.6261		0.01	0.0159719	0.3666	0.585529	0.9978	1.59368		1.1817		1.6005	1.3544	1.1389	0.963781	0.01	0.00846238
osa-miR5157b-3p	24	AGAAGTTGTGGCTATCAAAAAGTT	2.8312	1.2521		0.01	0.00798658	0.01	0.00798658	1.2829	1.0246		0.01		0.2462	24.62	0.01	1	0.01	1
osa-miR5157a-3p	24	AGAAGTTGTGGCTATCAAAAAGTT	2.8312	1.2521		0.01	0.00798658	0.01	0.00798658	1.2829	1.0246		0.01		0.2462	24.62	0.01	1	0.01	1
osa-miR812o-5p	21	CGTGTTCAACGTTTGACTGTC	6.3937	0.8348		0.7224	0.865357	1.2832	1.53713	0.4276	0.512218		1.1817		0.9849	0.83346	0.9491	0.803165	0.01	0.00846238
osa-miR5825	24	AAAACATCTGATAACCTGAAACGG	7.0765	0.4174		0.01	0.0239578	0.3666	0.878294	0.9978	2.39051		1.8908		0.7387	0.390681	1.3287	0.702718	1.3265	0.701555
osa-miR1436	21	ACATTATGGGACGGAGGGAGT	7.6422	0.4174		0.01	0.0239578	0.7332	1.75659	0.2851	0.683038		1.6544		0.3693	0.223223	2.2778	1.37681	1.895	1.14543
osa-miR5153	24	TGGATTCCACTGACACGTAGACGT	6.7255	1.6695		0.903	0.540881	1.2832	0.768613	0.5702	0.341539		1.4181		0.4925	0.347296	0.01	0.00705169	0.379	0.267259
osa-miR6247	21	TGGCTGATTGACCTAATGGCA	6.8423	0.4174		0.7224	1.73071	0.3666	0.878294	0.7127	1.70747		1.4181		0.7387	0.520908	1.7084	1.20471	0.758	0.534518
osa-miR1880	24	TTCCAAGCGGGCCACTTAAGCATT	5.3641	0.01		0.7224	72.24	0.9166	91.66	0.4276	42.76		0.4727		1.108	2.34398	0.7593	1.6063	0.9475	2.00444
osa-miR5830	24	ATGTAGATGAGGTGATGTTACACA	4.5024	0.01		0.7224	72.24	0.01	1	0.01	1		1.1817		0.8618	0.729288	0.5695	0.481933	1.137	0.962173
osa-miR1874-5p	24	TAGGGCTACTACACCATCCATAAG	7.7211	1.8782		0.01	0.00532425	1.2832	0.683207	0.9978	0.531253		1.4181		0.9849	0.694521	1.1389	0.803117	0.01	0.00705169
osa-miR398a	21	TGTGTTCTCAGGTCACCCCTT	1.5875	0.01		0.01	1	1.0999	109.99	0.4276	42.76		0.01		0.01	1	0.01	1	0.01	1
osa-miR5079a	22	TTTGGATCTGTTATTTTGGTAT	2.4623	0.01		0.5418	54.18	0.3666	36.66	0.01	1		0.9454		0.01	0.0105775	0.01	0.0105775	0.5685	0.601333
osa-miR5079b	22	TTTGGATCTGTTATTTTGGTAT	2.4623	0.01		0.5418	54.18	0.3666	36.66	0.01	1		0.9454		0.01	0.0105775	0.01	0.0105775	0.5685	0.601333
osa-miR5801	24	ACCAAATCGTTTTCGATCGTTGGA	5.7249	0.8348		0.3612	0.432678	0.01	0.0119789	0.7127	0.853737		1.4181		0.4925	0.347296	0.3796	0.267682	1.516	1.06904
osa-miR395t	21	GTGAAGTGTTTGGGGAAACTC	8.3763	0.8348		0.3612	0.432678	1.4665	1.75671	0.4276	0.512218		0.9454		0.7387	0.781362	0.9491	1.00391	2.653	2.80622
osa-miR5149	22	GAGGAGCTGTGACGATTTGGGA	4.5433	1.0435		0.01	0.00958313	1.0999	1.05405	0.8552	0.81955		0.709		0.2462	0.34725	0.5695	0.803244	0.01	0.0141044
osa-miR5148b	24	TGAGGGGTAGAAATGTCATATCAT	4.275	0.01		0.01	1	0.01	1	0.9978	99.78		1.1817		1.108	0.937632	0.01	0.00846238	0.9475	0.801811
osa-miR5148a	24	TGAGGGGTAGAAATGTCATATCAT	4.275	0.01		0.01	1	0.01	1	0.9978	99.78		1.1817		1.108	0.937632	0.01	0.00846238	0.9475	0.801811
osa-miR5148c	24	TGAGGGGTAGAAATGTCATATCAT	4.275	0.01		0.01	1	0.01	1	0.9978	99.78		1.1817		1.108	0.937632	0.01	0.00846238	0.9475	0.801811
osa-miR166k-5p	21	GGTTTGTTGTCTGGCTCGAGG	4.3597	2.0869		0.01	0.0047918	0.01	0.0047918	0.01	0.0047918		1.4181		0.2462	0.173613	0.01	0.00705169	0.5685	0.400889
osa-miR396b-3p	20	GTTCAATAAAGCTGTGGGAA	4.263	0.6261		0.01	0.0159719	0.01	0.0159719	0.01	0.0159719		1.8908		0.01	0.00528877	0.3796	0.200762	1.3265	0.701555
osa-miR396a-3p	20	GTTCAATAAAGCTGTGGGAA	4.263	0.6261		0.01	0.0159719	0.01	0.0159719	0.01	0.0159719		1.8908		0.01	0.00528877	0.3796	0.200762	1.3265	0.701555
osa-miR2120	24	AAAGATCTTTAGTCCCGGTTGTTC	3.7266	0.01		0.01	1	0.01	1	0.2851	28.51		0.4727		1.2311	2.6044	1.3287	2.81087	0.379	0.801777
osa-miR5154	24	AGCACCAGTTGACGTGACGCTGAG	3.2421	0.8348		0.01	0.0119789	0.01	0.0119789	0.2851	0.341519		0.709		0.2462	0.34725	0.01	0.0141044	1.137	1.60367
osa-miR1429-5p	21	GTAATATACTAATCCGTGCAT	2.3414	0.4174		0.01	0.0239578	0.3666	0.878294	0.7127	1.70747		0.01		0.2462	24.62	0.01	1	0.5685	56.85
osa-miR171f-5p	21	TGTTGGCATGGTTCAATCAAA	5.1078	1.2521		0.01	0.00798658	0.7332	0.585576	1.2829	1.0246		0.01		0.4925	49.25	0.3796	37.96	0.9475	94.75
osa-miR814c	22	CACTTCATAGTACAACGAATCT	3.8899	0.6261		0.01	0.0159719	0.7332	1.17106	0.2851	0.455359		0.4727		0.2462	0.520838	0.3796	0.803046	1.137	2.40533
osa-miR2867-5p	22	TGTGCCATCCCACACATCCCGA	4.5379	0.4174		0.01	0.0239578	2.383	5.70915	0.8552	2.04887		0.4727		0.01	0.0211551	0.3796	0.803046	0.01	0.0211551
osa-miR814a	22	CACTTCATAGTACAACGAATCT	3.8899	0.6261		0.01	0.0159719	0.7332	1.17106	0.2851	0.455359		0.4727		0.2462	0.520838	0.3796	0.803046	1.137	2.40533
osa-miR814b	22	CACTTCATAGTACAACGAATCT	3.8899	0.6261		0.01	0.0159719	0.7332	1.17106	0.2851	0.455359		0.4727		0.2462	0.520838	0.3796	0.803046	1.137	2.40533
osa-miR1872	24	GAACTGTAAGTCTGTGACGGGTAA	2.5537	1.4608		0.01	0.00684556	0.01	0.00684556	0.5702	0.390334		0.4727		0.01	0.0211551	0.01	0.0211551	0.01	0.0211551
osa-miR5815	24	AATGTTATGGACACTAGATGACAT	3.7155	0.6261		0.01	0.0159719	0.01	0.0159719	0.4276	0.682958		0.9454		0.3693	0.390628	0.3796	0.401523	0.9475	1.00222
osa-miR1861c	22	CGATCTTGTAGCAAGAACTGAG	5.3002	0.01		0.01	1	0.01	1	0.2851	28.51		0.9454		0.2462	0.260419	2.088	2.20859	1.7055	1.804
osa-miR2118r	22	TTCCCAATGCCTCCCATGCCTA	4.1774	0.01		0.01	1	0.01	1	0.4276	42.76		1.8908		0.4925	0.260472	0.01	0.00528877	1.3265	0.701555
osa-miR2118e	22	TTCCCAATGCCTCCCATGCCTA	4.1774	0.01		0.01	1	0.01	1	0.4276	42.76		1.8908		0.4925	0.260472	0.01	0.00528877	1.3265	0.701555
osa-miR5824	24	AGTCTGATAAGAAGTCAATGGCGT	3.2251	0.8348		0.7224	0.865357	0.5499	0.658721	0.01	0.0119789		0.709		0.01	0.0141044	0.01	0.0141044	0.379	0.534556
osa-miR5337a	21	AAATTACTTGTCGTTCTAGCT	3.643	0.4174		0.01	0.0239578	0.01	0.0239578	1.2829	3.07355		0.4727		0.4925	1.04189	0.01	0.0211551	0.9475	2.00444
osa-miR5505	22	GAGGATTCGGTATTGATCGCTA	2.1988	1.0435		0.01	0.00958313	0.3666	0.351318	0.01	0.00958313		0.01		0.7387	73.87	0.01	1	0.01	1
osa-miR1866-5p	24	GAGGGATTTTGCGGGAATTTCACG	2.7687	0.01		0.01	1	0.01	1	0.01	1		0.4727		0.7387	1.56272	0.7593	1.6063	0.758	1.60355
osa-miR5523	22	TGAGGAGGAACATATTTACTAG	3.8886	1.0435		0.3612	0.346143	0.01	0.00958313	0.5702	0.54643		0.709		0.2462	0.34725	0.5695	0.803244	0.379	0.534556
osa-miR5817	24	ATCGAATTTGAAAGAAAAAGGTAT	4.4123	0.4174		0.01	0.0239578	0.3666	0.878294	1.7105	4.09799		0.01		0.3693	36.93	1.5185	151.85	0.01	1
osa-miR167c-3p	23	GGTCATGCTGCGGCAGCCTCACT	3.7068	0.01		0.01	1	0.01	1	0.2851	28.51		0.709		1.7236	2.43103	0.9491	1.33865	0.01	0.0141044
osa-miR399h	21	TGCCAAAGGAGACTTGCCCAG	0.08	0.01		0.01	1	0.01	1	0.01	1		0.01		0.01	1	0.01	1	0.01	1
osa-miR171i-5p	21	AGGTATTGGCGTGCCTCAATC	1.1302	0.01		0.3612	36.12	0.01	1	0.01	1		0.709		0.01	0.0141044	0.01	0.0141044	0.01	0.0141044
osa-miR5158	24	TGAGCCACTGGGATGAGGATGAAT	3.4986	0.4174		0.01	0.0239578	0.9166	2.19598	1.2829	3.07355		0.4727		0.01	0.0211551	0.01	0.0211551	0.379	0.801777
osa-miR439i	21	TGTCGAACCGCGGTTGTTCGA	0.6856	0.01		0.01	1	0.01	1	0.01	1		0.01		0.6156	61.56	0.01	1	0.01	1
osa-miR5532	22	ATGGAATATATGACAAAGGTGG	1.085	0.01		0.3612	36.12	0.01	1	0.4276	42.76		0.01		0.2462	24.62	0.01	1	0.01	1
osa-miR5803	24	ACCACTGTAGACGCTACGTGTGAG	1.544	0.01		0.01	1	0.3666	36.66	0.2851	28.51		0.4727		0.01	0.0211551	0.3796	0.803046	0.01	0.0211551
osa-miR5525	22	TGAACCTTGGGAGCGATCTGAA	2.7221	0.4174		0.01	0.0239578	0.3666	0.878294	1.4254	3.41495		0.4727		0.01	0.0211551	0.01	0.0211551	0.01	0.0211551
osa-miR3981-5p	21	TGGGACGTATCCTATTACTAT	2.1992	0.01		0.01	1	0.5499	54.99	0.2851	28.51		0.709		0.2462	0.34725	0.01	0.0141044	0.379	0.534556
osa-miR172c	21	TGAATCTTGATGATGCTGCAC	2.2619	0.01		0.3612	36.12	0.01	1	0.8552	85.52		0.01		0.2462	24.62	0.7593	75.93	0.01	1
osa-miR5795	22	ATGTCGAGGTCGAGTTCCCGGC	0.8467	0.4174		0.01	0.0239578	0.01	0.0239578	0.01	0.0239578		0.01		0.3693	36.93	0.01	1	0.01	1
osa-miR5808	24	ACTAAATCGTTTCTGATCGTTGGA	1.6039	0.4174		0.01	0.0239578	0.01	0.0239578	0.4276	1.02444		0.4727		0.2462	0.520838	0.01	0.0211551	0.01	0.0211551
osa-miR821a	24	AAGTCATCAACAAAAAAGTTGAAT	1.5825	0.01		0.01	1	0.3666	36.66	0.4276	42.76		0.01		0.3693	36.93	0.01	1	0.379	37.9
osa-miR821b	24	AAGTCATCAACAAAAAAGTTGAAT	1.5825	0.01		0.01	1	0.3666	36.66	0.4276	42.76		0.01		0.3693	36.93	0.01	1	0.379	37.9
osa-miR821c	24	AAGTCATCAACAAAAAAGTTGAAT	1.5825	0.01		0.01	1	0.3666	36.66	0.4276	42.76		0.01		0.3693	36.93	0.01	1	0.379	37.9
osa-miR1852	21	ATATGGATTCAGAATGCAGGT	2.5038	1.2521		0.01	0.00798658	0.9166	0.73205	0.2851	0.227697		0.01		0.01	1	0.01	1	0.01	1
osa-miR5152-5p	21	GTAGGGATAGGCATGATCTCT	2.0267	0.6261		0.01	0.0159719	0.3666	0.585529	0.2851	0.455359		0.4727		0.2462	0.520838	0.01	0.0211551	0.01	0.0211551
osa-miR1866-3p	22	TGAAATTCCTGTAAAATTCTTG	2.0664	0.01		0.01	1	0.01	1	0.01	1		0.709		0.3693	0.520874	0.3796	0.535402	0.5685	0.801834
osa-miR6252	23	ATTCGTTGTATTAAGAGAGGGTT	1.541	0.01		0.01	1	0.7332	73.32	0.2851	28.51		0.4727		0.01	0.0211551	0.01	0.0211551	0.01	0.0211551
osa-miR5162	24	AAATGACCAAAATACCCCTAGAAC	1.5588	0.01		0.01	1	0.5499	54.99	0.7127	71.27		0.01		0.2462	24.62	0.01	1	0.01	1
osa-miR6253	22	GAGGAAAGTGGGCAGTTGGGTT	0.08	0.01		0.01	1	0.01	1	0.01	1		0.01		0.01	1	0.01	1	0.01	1
osa-miR1428d	21	TAAGATAATGCCATGAATTCG	2.6735	0.01		0.01	1	0.01	1	0.2851	28.51		0.4727		0.7387	1.56272	0.01	0.0211551	1.137	2.40533
osa-miR5539b	22	AAGAAAACGGATGCGCGTGCTA	0.8764	0.01		0.01	1	0.01	1	0.5702	57.02		0.01		0.2462	24.62	0.01	1	0.01	1
osa-miR1428b	21	TAAGATAATGCCATGAATTCG	2.6735	0.01		0.01	1	0.01	1	0.2851	28.51		0.4727		0.7387	1.56272	0.01	0.0211551	1.137	2.40533
osa-miR1428c	21	TAAGATAATGCCATGAATTCG	2.6735	0.01		0.01	1	0.01	1	0.2851	28.51		0.4727		0.7387	1.56272	0.01	0.0211551	1.137	2.40533
osa-miR5539a	22	AAGAAAACGGATGCGCGTGCTA	0.8764	0.01		0.01	1	0.01	1	0.5702	57.02		0.01		0.2462	24.62	0.01	1	0.01	1
osa-miR5503	22	TTCGGATCTTTCTAGAGGCATT	1.5298	0.6261		0.3612	0.576905	0.01	0.0159719	0.01	0.0159719		0.01		0.4925	49.25	0.01	1	0.01	1
osa-miR5819	21	AGGACGAGGGGAACGGCGGCG	1.969	0.6261		0.01	0.0159719	0.01	0.0159719	1.2829	2.04903		0.01		0.01	1	0.01	1	0.01	1
osa-miR5816	24	TAGGAGTGTTTGTAGGAGCGCCAC	0.6674	0.01		0.3612	36.12	0.01	1	0.01	1		0.01		0.2462	24.62	0.01	1	0.01	1
osa-miR5502	22	TACGGATACGGATACGCGATAC	1.7774	0.01		0.5418	54.18	0.01	1	0.4276	42.76		0.01		0.01	1	0.01	1	0.758	75.8
osa-miR5340	23	TGATGACGTGGATGAATTTCAAA	0.3551	0.01		0.01	1	0.01	1	0.2851	28.51		0.01		0.01	1	0.01	1	0.01	1
osa-miR5152-3p	21	AGACCATGCCTATACCTACCA	0.857	0.4174		0.01	0.0239578	0.01	0.0239578	0.01	0.0239578		0.01		0.01	1	0.3796	37.96	0.01	1
osa-miR395f	21	GTGAATTGTTTGGGGGAACTC	1.5658	0.01		0.01	1	0.01	1	0.2851	28.51		0.4727		0.01	0.0211551	0.01	0.0211551	0.758	1.60355
osa-miR2096-5p	21	TGCCGATTTCCCCCTCGGGCG	1.0548	0.01		0.01	1	0.01	1	0.01	1		0.01		0.2462	24.62	0.3796	37.96	0.379	37.9
osa-miR2868	20	TTGGTTTTGTGTAGTAGAAA	0.6728	0.01		0.01	1	0.3666	36.66	0.01	1		0.01		0.2462	24.62	0.01	1	0.01	1
osa-miR5538	22	ACTGAACTCAATCACTTGCTGC	1.3094	0.4174		0.01	0.0239578	0.01	0.0239578	0.01	0.0239578		0.4727		0.3693	0.781257	0.01	0.0211551	0.01	0.0211551
osa-miR529a	20	CTGTACCCTCTCTCTTCTTC	1.6944	0.6261		0.01	0.0159719	0.7332	1.17106	0.2851	0.455359		0.01		0.01	1	0.01	1	0.01	1
osa-miR5541	21	TCAAGTGGTGTACTCTAAAGA	1.9365	0.4174		0.3612	0.865357	0.01	0.0239578	0.01	0.0239578		0.01		0.3693	36.93	0.3796	37.96	0.379	37.9
osa-miR1428a-3p	21	TAAGATAAAGCCGTGAATTTG	0.8757	0.01		0.01	1	0.01	1	0.01	1		0.01		0.2462	24.62	0.5695	56.95	0.01	1
osa-miR160d-3p	21	GCGTGCGAGGAGCCAAGCATG	1.7395	1.6695		0.01	0.00598982	0.01	0.00598982	0.01	0.00598982		0.01		0.01	1	0.01	1	0.01	1
osa-miR1861d	22	TGGTCTTGAGGCAGGAACTGAG	1.7463	0.01		0.01	1	0.01	1	0.2851	28.51		0.4727		0.01	0.0211551	0.5695	1.20478	0.379	0.801777
osa-miR319a-3p	21	ACTGGATGACGCGGGAGCTAA	0.6402	0.01		0.01	1	0.01	1	0.5702	57.02		0.01		0.01	1	0.01	1	0.01	1
osa-miR5157a-5p	24	AACTTTTTAATAGCTACAACTTCT	0.08	0.01		0.01	1	0.01	1	0.01	1		0.01		0.01	1	0.01	1	0.01	1
osa-miR1850.2	21	TTGTGTGTGAACTAAACGTGG	0.3162	0.01		0.01	1	0.01	1	0.01	1		0.01		0.2462	24.62	0.01	1	0.01	1
osa-miR5157b-5p	24	AACTTTTTAATAGCTACAACTTCT	0.08	0.01		0.01	1	0.01	1	0.01	1		0.01		0.01	1	0.01	1	0.01	1
osa-miR5526	21	AAAGGTAGAGTCAGGTATGAG	0.6852	0.01		0.01	1	0.01	1	0.01	1		0.01		0.2462	24.62	0.01	1	0.379	37.9
osa-miR5810	24	ACGGAACCCTAATGGCGATGGCAT	1.148	0.01		0.01	1	0.01	1	0.01	1		0.709		0.01	0.0141044	0.01	0.0141044	0.379	0.534556
osa-miR2096-3p	21	CCTGAGGGGAAATCGGCGGGA	1.8431	0.4174		0.903	2.16339	0.01	0.0239578	0.01	0.0239578		0.4727		0.01	0.0211551	0.01	0.0211551	0.01	0.0211551
osa-miR531c	24	CTCGCCGGGGCTGCGTGCCGCCAT	0.08	0.01		0.01	1	0.01	1	0.01	1		0.01		0.01	1	0.01	1	0.01	1
osa-miR443	22	ATCACAATACAATAAATCTGGA	1.0085	0.01		0.01	1	0.01	1	0.01	1		0.01		0.01	1	0.5695	56.95	0.379	37.9
osa-miR531a	24	CTCGCCGGGGCTGCGTGCCGCCAT	0.08	0.01		0.01	1	0.01	1	0.01	1		0.01		0.01	1	0.01	1	0.01	1
osa-miR5792	24	GATGACAGCGGTGGTTCGGACATC	0.7789	0.01		0.01	1	0.01	1	0.01	1		0.4727		0.2462	0.520838	0.01	0.0211551	0.01	0.0211551
osa-miR1847.2	24	TGGCCCACATGTTAGTGCCACAAC	0.08	0.01		0.01	1	0.01	1	0.01	1		0.01		0.01	1	0.01	1	0.01	1
osa-miR1319a	24	AACCGGCATCTGTAATATATTATA	0.779	0.01		0.01	1	0.01	1	0.01	1		0.709		0.01	0.0141044	0.01	0.0141044	0.01	0.0141044
osa-miR5077	19	GTTCGCGTCGGGTTCACCA	0.8186	0.01		0.01	1	0.01	1	0.01	1		0.01		0.01	1	0.3796	37.96	0.379	37.9
osa-miR1442	20	ATTCATAGTACTAGATGTGT	0.08	0.01		0.01	1	0.01	1	0.01	1		0.01		0.01	1	0.01	1	0.01	1
osa-miR1861n	22	CGATCTTGTGGCAGGAGCTGAG	1.0469	0.4174		0.01	0.0239578	0.01	0.0239578	0.01	0.0239578		0.01		0.01	1	0.5695	56.95	0.01	1
osa-miR816	20	GTGACATATTTTACTACAAC	0.08	0.01		0.01	1	0.01	1	0.01	1		0.01		0.01	1	0.01	1	0.01	1
osa-miR5799	24	AAGACGAATAATCAAACGTTGGAC	0.6852	0.01		0.01	1	0.01	1	0.01	1		0.01		0.2462	24.62	0.01	1	0.379	37.9
osa-miR160e-3p	21	GCGTGCGAGGTGCCAAGCATG	0.08	0.01		0.01	1	0.01	1	0.01	1		0.01		0.01	1	0.01	1	0.01	1
osa-miR3979-3p	20	CTTCGGGGGAGGAGAGAAGC	0.6852	0.01		0.01	1	0.01	1	0.01	1		0.01		0.2462	24.62	0.01	1	0.379	37.9
osa-miR5534b	21	CGATGACAACAGCTAGAATGG	0.3551	0.01		0.01	1	0.01	1	0.2851	28.51		0.01		0.01	1	0.01	1	0.01	1
osa-miR417	21	GAATGTAGTGAATTTGTTCCA	0.3162	0.01		0.01	1	0.01	1	0.01	1		0.01		0.2462	24.62	0.01	1	0.01	1
osa-miR6255	22	TGGGAAAAATGGGCAGTTGAGT	0.4366	0.01		0.01	1	0.3666	36.66	0.01	1		0.01		0.01	1	0.01	1	0.01	1
osa-miR5078	21	CCTCGTTCGACCGTGGCATTT	0.779	0.01		0.01	1	0.01	1	0.01	1		0.709		0.01	0.0141044	0.01	0.0141044	0.01	0.0141044
osa-miR2118m	22	TTCCTGATGCCTCCCATTCCTA	0.08	0.01		0.01	1	0.01	1	0.01	1		0.01		0.01	1	0.01	1	0.01	1
osa-miR2118f	22	TTCCTGATGCCTCCCATTCCTA	0.08	0.01		0.01	1	0.01	1	0.01	1		0.01		0.01	1	0.01	1	0.01	1
osa-miR2118j	22	TTCCTGATGCCTCCCATTCCTA	0.08	0.01		0.01	1	0.01	1	0.01	1		0.01		0.01	1	0.01	1	0.01	1
osa-miR2118h	22	TTCCTGATGCCTCTCATTCCTA	0.08	0.01		0.01	1	0.01	1	0.01	1		0.01		0.01	1	0.01	1	0.01	1
osa-miR160c-3p	21	GCGTGCACGGAGCCAAGCATA	0.08	0.01		0.01	1	0.01	1	0.01	1		0.01		0.01	1	0.01	1	0.01	1
osa-miR7692-5p	24	GATCCAAAAAAGTGCCACGTGAGC	0.08	0.01		0.01	1	0.01	1	0.01	1		0.01		0.01	1	0.01	1	0.01	1
osa-miR5543	21	TATGAATGGTATATTTTCTTG	0.08	0.01		0.01	1	0.01	1	0.01	1		0.01		0.01	1	0.01	1	0.01	1
osa-miR2931	20	CTTTATTGTTGATGTCAAAA	0.08	0.01		0.01	1	0.01	1	0.01	1		0.01		0.01	1	0.01	1	0.01	1
osa-miR5829	24	ATCAGGACCAGTAGGCGATGGTAA	0.08	0.01		0.01	1	0.01	1	0.01	1		0.01		0.01	1	0.01	1	0.01	1
osa-miR5081	22	TAATTTGTAGCAAATTGATAGT	0.08	0.01		0.01	1	0.01	1	0.01	1		0.01		0.01	1	0.01	1	0.01	1
osa-miR2092-3p	22	ACCAGCATTCCATTGGCAGAGG	0.08	0.01		0.01	1	0.01	1	0.01	1		0.01		0.01	1	0.01	1	0.01	1
osa-miR2105	20	TTGTGATGTGAATGATTCAT	0.08	0.01		0.01	1	0.01	1	0.01	1		0.01		0.01	1	0.01	1	0.01	1
osa-miR2118k	22	TTCCTGATGCCTCTCATTCCTA	0.08	0.01		0.01	1	0.01	1	0.01	1		0.01		0.01	1	0.01	1	0.01	1
osa-miR2118c	22	TTCCCGATGCCTCCTATTCCTA	0.08	0.01		0.01	1	0.01	1	0.01	1		0.01		0.01	1	0.01	1	0.01	1
osa-miR5337b	21	CTAGAACGGCAAGCAATTTGA	0.08	0.01		0.01	1	0.01	1	0.01	1		0.01		0.01	1	0.01	1	0.01	1
osa-miR531b	20	CTCGCCGGGGCTGCGTGCCG	0.08	0.01		0.01	1	0.01	1	0.01	1		0.01		0.01	1	0.01	1	0.01	1
osa-miR2101-3p	22	ATTTAACTCAAGTGAGCATTGT	0.08	0.01		0.01	1	0.01	1	0.01	1		0.01		0.01	1	0.01	1	0.01	1
osa-miR1877	24	AGATGACATGTGAATGATGAGGGG	0.08	0.01		0.01	1	0.01	1	0.01	1		0.01		0.01	1	0.01	1	0.01	1
osa-miR5498	21	TGAGCTGTAACACTTGAAGAC	0.3162	0.01		0.01	1	0.01	1	0.01	1		0.01		0.2462	24.62	0.01	1	0.01	1
osa-miR2097-5p	22	AGAGATGGGACGGGCAGGGAAG	0.08	0.01		0.01	1	0.01	1	0.01	1		0.01		0.01	1	0.01	1	0.01	1
osa-miR1882e-3p	24	GAAATGATCTTGGACGTAATCTAG	0.08	0.01		0.01	1	0.01	1	0.01	1		0.01		0.01	1	0.01	1	0.01	1
osa-miR1440b	21	TTTAGGAGAGTGGTATTTGAG	0.08	0.01		0.01	1	0.01	1	0.01	1		0.01		0.01	1	0.01	1	0.01	1
osa-miR2118q	22	TTCCCGATGCCTCCTATTCCTA	0.08	0.01		0.01	1	0.01	1	0.01	1		0.01		0.01	1	0.01	1	0.01	1
osa-miR418	21	TAATGTGATGATGAAATGACG	0.08	0.01		0.01	1	0.01	1	0.01	1		0.01		0.01	1	0.01	1	0.01	1
miR9774-y	23	AGCAAGATATTGGGTATTTCTTT	82255.5	5335.18		1591.93	0.298383	6718.87	1.25935	6629.09	1.24252		16411.2		13173.2	0.802691	18324.7	1.11659	14071.4	0.857422
miR159-y	20	TTTGGATTGAAGGGAGCTTG	9423.04	675.115		2084.4	3.08748	861.192	1.27562	918.097	1.35991		750.864		1830.35	2.43765	1704	2.26938	599.019	0.797773
miR396-x	20	TCCACAGGCTTCTTGAACTG	6261.89	897.371		304.118	0.338899	789.701	0.880016	629.74	0.701761		1164.7		672.822	0.577678	647.09	0.555584	1156.35	0.992827
miR168-x	20	TCGCTTGTGCAGATCGGGAC	5252.94	707.045		623.948	0.882474	351.589	0.497266	572.154	0.809219		651.6		650.292	0.997993	609.317	0.935108	1086.99	1.66819
miR5139-x	18	AACCTGGCTCTGATACCA	6210.77	729.792		135.987	0.186336	849.827	1.16448	683.905	0.937123		1183.37		553.894	0.468063	611.784	0.516983	1462.21	1.23563
miR812-y	24	GAACGGTCAAACGTTGGACACGGA	4713.53	868.572		255.9	0.294622	402.916	0.463884	656.11	0.755389		875.654		413.789	0.472549	516.306	0.589623	724.281	0.827132
miR5072-x	20	TCTCCCCAGCGGAGTCGCCA	4227.4	709.549		193.776	0.273098	458.642	0.646386	366.042	0.515879		950.811		503.047	0.529071	370.905	0.390093	674.631	0.709532
miR8155-y	18	AACCTGGCTCTGATACCA	5843.56	704.332		121.72	0.172816	793.001	1.12589	602.23	0.855037		1175.1		495.906	0.422012	543.07	0.462147	1408.2	1.19836
miR894-x	19	TTTCACGTCGGGTTCACCA	5226.33	880.467		173.911	0.197521	679.898	0.772202	524.403	0.595597		1124.29		335.365	0.298291	532.061	0.473242	975.941	0.868053
miR1511-y	18	AACCTGGCTCTGATACCA	3596.8	378.565		80.5444	0.212762	559.646	1.47834	258.282	0.682265		738.811		297.692	0.402933	307.316	0.41596	975.941	1.32096
miR5054-y	19	TTCCCCACGGACGGCGCCA	2567.76	237.281		491.213	2.07017	345.173	1.4547	116.027	0.488985		407.457		360.357	0.884406	260.431	0.639161	349.823	0.858552
miR166-y	21	TCGGATTAGGCTTCATTCCCC	2569.83	438.251		36.2992	0.0828274	461.942	1.05406	295.057	0.67326		446.454		223.823	0.501335	229.49	0.514029	438.51	0.982208
miR8175-y	19	ATCCCCGGCAACGGCGCCA	2392.41	256.064		172.466	0.673529	236.837	0.924914	395.12	1.54305		339.626		315.174	0.928003	359.516	1.05856	317.607	0.935167
miR9773-y	26	TTTTTTTTTATGTTATTTTGTGAAGG	1691.51	232.064		52.7331	0.227235	265.433	1.14379	339.814	1.46431		245.798		237.365	0.965694	189.439	0.77071	128.862	0.524261
miR6225-x	21	AGACTCAAAAGATTCGTCTCG	1510.72	235.195		65.9164	0.280263	172.862	0.734973	205.399	0.873317		237.762		143.798	0.604799	173.494	0.729696	276.296	1.16207
miR169-x	24	TGGTGATAAGGGTGTAGCTCTGGA	1825.17	296.132		318.205	1.07454	247.836	0.836908	216.945	0.732595		178.203		183.318	1.0287	244.676	1.37302	139.853	0.784797
miR167-x	20	TGAAGCTGCCAGCATGATGA	1550.7	383.574		103.119	0.268836	169.196	0.441103	161.782	0.421776		244.852		122.253	0.499293	112.372	0.45894	253.555	1.03554
miR169-y	22	TGAGTCGCTCTTATCACTCATT	1119.15	156.727		161.811	1.03244	187.893	1.19886	170.05	1.08501		99.7371		129.024	1.29364	90.5433	0.90782	123.367	1.23692
miR7767-x	20	CCCAAGATGAGTGCTCTCCC	746.821	40.486		236.215	5.8345	74.0574	1.82921	70.8422	1.74979		56.2498		143.552	2.55204	94.3397	1.67716	31.0785	0.552509
miR818-y	24	AAATCCCTTATATTATAGGACGGG	703.402	112.067		34.1321	0.304569	64.8919	0.579046	94.3612	0.842007		118.645		91.3512	0.769957	93.96	0.791945	93.9935	0.792227
miR168-y	21	CTTGCCTTGCACCAAGTGAAT	857.7	85.3546		24.5606	0.287748	109.803	1.28643	229.631	2.69032		89.8107		101.2	1.12682	101.553	1.13074	115.786	1.28923
miR9664-y	22	ATGCAGTCCTCGATGTCGTAGG	597.401	65.5289		84.3369	1.28702	77.9069	1.18889	84.526	1.2899		51.7593		94.3059	1.82201	79.344	1.53294	59.6935	1.15329
miR5794-y	23	TGAGGAATCACTAGTAGTCGTTT	634.573	102.05		37.2021	0.364548	95.8713	0.939456	96.4993	0.94561		76.5754		60.4494	0.78941	66.816	0.872552	99.1101	1.29428
miR397-x	22	TTGAGTGCAGCGTTGATGAACT	279.443	7.0955		10.2938	1.45075	7.1491	1.00755	7.9822	1.12497		47.9778		84.9492	1.77059	62.8298	1.30956	51.1658	1.06645
miR165-y	18	TCGGACCAGGCTTCACCC	443.815	84.7285		3.4313	0.0404976	69.8412	0.824294	40.6238	0.479459		91.2287		42.844	0.469633	41.5702	0.45567	69.5476	0.762343
miR5160-y	24	GCGAGATCGACGTTATATTTCTGC	439.298	151.927		20.5876	0.13551	129.784	0.85425	131.707	0.866907		1.1817		2.2161	1.87535	0.3796	0.321232	1.516	1.2829
miR812-x	20	TTTGTGTCCAACGTTTGACT	386.282	32.3471		13.0027	0.401974	22.5472	0.697039	23.3765	0.722677		74.212		65.4971	0.882568	58.2742	0.78524	97.0256	1.30741
miR827-y	22	TTAGATGACCATCAGCAAACAG	46.7238	2.9217		0.7224	0.247253	4.9494	1.69401	3.2784	1.12209		8.5084		7.7562	0.911593	9.6807	1.13778	8.9066	1.0468
miR171-y	22	TTGAGCCGTGCCAATATCACGA	347.917	59.2682		33.0485	0.557609	42.8946	0.723737	53.7374	0.906682		33.0881		41.4897	1.25392	37.2044	1.1244	47.1863	1.42608
miR5145-x	24	CCACCTGTTTGGATCCTTGAGAGC	286.506	22.1212		38.8275	1.75522	18.1477	0.820376	36.0625	1.63022		34.0335		47.7685	1.40357	59.7927	1.75688	29.752	0.874197
miR160-x	21	TGCCTGGCTCCCTGTATGCTT	350.128	35.2688		31.062	0.880722	83.9561	2.38046	49.6038	1.40645		35.2152		43.3364	1.23062	32.2691	0.91634	39.4166	1.11931
miR444-y	21	TGCAGTTGTTGTCTCAAGCAG	316.824	41.3208		30.3396	0.734245	29.8796	0.723113	38.7708	0.938288		38.524		54.5399	1.41574	41.0007	1.06429	42.4487	1.10188
miR6478-x	20	CCGACCTTAGCTCAGTTGGA	244.168	25.8777		7.4043	0.286127	61.409	2.37305	11.9733	0.462688		34.0335		25.731	0.756049	26.0051	0.764103	51.7344	1.5201
miR5801-x	21	AATTGTTTCCGATCGTTGGAT	323.648	52.7988		23.1159	0.437811	34.829	0.659655	46.0403	0.871995		48.4505		23.0225	0.475176	42.7091	0.8815	52.6819	1.08733
miR820-x	23	TCGGCCTCGTGGATGGACCAGGT	268.749	38.6078		11.0162	0.285336	42.3447	1.09679	26.5124	0.686711		40.1784		33.8566	0.842657	31.5098	0.784247	44.7227	1.1131
miR393-x	20	TCCAAGGGATCGCATTGATC	230.472	28.5907		21.8517	0.764294	33.3625	1.1669	20.8108	0.727887		25.0524		38.0425	1.51852	21.4495	0.856185	41.3117	1.64901
miR435-y	22	TTATCCGGTATTGGAGTTGATT	214.323	29.8428		15.7116	0.526479	19.6142	0.657251	33.0692	1.10811		27.6522		23.3918	0.845929	24.8662	0.899249	40.1747	1.45286
miR156-y	23	GCTCACTGCTCTGTCTGTCATCC	162.29	28.7993		5.779	0.200665	33.1792	1.15208	18.5301	0.643422		18.9075		13.2964	0.703234	13.8567	0.732868	29.9415	1.58358
miR5168-y	21	TCGGATTAGGCTTCAATCCCT	269.354	50.0858		4.1536	0.0829297	36.2955	0.724666	31.3587	0.6261		47.7415		21.7913	0.456444	25.4356	0.532778	52.4924	1.09951
miR5799-x	21	ATAAGACGAATAGTCAAACGA	187.95	28.5907		13.7251	0.480055	16.6812	0.583448	23.0914	0.807654		32.8518		18.5903	0.565884	19.1716	0.583578	35.2476	1.07293
miR5809-y	21	CTCGTCGCCGGCGACCACAGC	188.256	37.7731		14.8086	0.392041	22.9138	0.606617	19.6705	0.520754		27.8886		17.6054	0.631276	18.6022	0.667018	28.994	1.03964
miR319-y	23	TTTGGATTGAAGGGAGCTCTTTC	146.335	8.765		23.6577	2.69911	17.0479	1.945	17.8174	2.03279		13.7079		31.7636	2.31717	20.1207	1.46782	13.4547	0.981529
miR5802-x	24	ATGGACTGTAGTTTGTAAAACGGA	97.6476	11.8954		19.6846	1.65481	4.5828	0.385258	13.3987	1.12638		9.9264		12.9271	1.30229	17.2735	1.74016	7.9591	0.801811
miR1130-y	24	CTCTTATATTATGGGACAGAGGGA	160.775	34.434		3.0701	0.089159	10.9986	0.319411	23.234	0.67474		25.7615		12.0653	0.468346	27.3338	1.06103	23.8774	0.926864
miR156-x	22	CTTGACAGAAGAGAGTGAGCAC	115.176	19.1996		2.1671	0.112872	22.5472	1.17436	21.9511	1.14331		18.4348		8.1256	0.440775	6.264	0.339792	16.4868	0.89433
miR5073-x	25	GTTTGGTGAATCGGAAACTTTTTTC	107.995	8.3476		45.3288	5.43016	4.9494	0.592913	9.6927	1.16114		5.9086		16.4974	2.7921	15.3753	2.60219	1.895	0.320719
miR5169-x	24	AGTTTGACCAAGTTTGTAGAAAAA	118.911	18.3648		5.9596	0.324512	13.1983	0.718674	15.6794	0.853775		20.3256		14.2813	0.702626	14.2364	0.700417	16.8658	0.829781
miR1425-x	23	TAGGATTCAATCCTTGCTGCTTT	119.364	14.191		15.3504	1.0817	5.316	0.374604	21.666	1.52674		8.5084		22.6531	2.66244	19.3615	2.27557	12.3177	1.44771
miR2873-y	21	TTTGGACTTGAGATTTGGTGA	65.2289	6.4694		1.9865	0.307061	8.4323	1.30341	6.2717	0.969441		7.3267		12.9271	1.76438	13.4771	1.83945	8.3381	1.13804
miR5825-y	24	AAAACATCTTATAATCTGAAACGG	126.575	18.7822		2.8895	0.153842	17.9644	0.956459	25.372	1.35085		20.3256		10.711	0.526971	12.3382	0.607028	18.1923	0.895044
miR5788-x	22	TGGATGTGACATACTCTAGTTT	91.7153	16.4866		9.9326	0.602465	8.9822	0.544818	9.6927	0.587914		12.7626		7.8793	0.617374	10.44	0.818015	15.5393	1.21757
miR2679-x	21	CTTTTCACTTTCGACCGGGTA	114.725	15.2344		3.2507	0.213379	39.2284	2.57499	19.813	1.30054		9.6901		9.1105	0.940186	9.8705	1.01862	8.5276	0.880032
miR1862-y	24	ACTAGGTTTGTTTATTTTGGGAAA	107.858	19.8256		5.0566	0.255054	18.5143	0.933858	20.0981	1.01374		13.2353		10.8341	0.818576	10.2502	0.774459	10.0437	0.758857
miR5808-x	21	AATTGTTTCCGATCGTTGGAT	116.286	13.7736		9.3908	0.681797	9.5321	0.692056	11.4032	0.827903		20.5619		10.0954	0.490976	16.8938	0.821607	24.6354	1.19811
miR5150-y	24	AGAAGCTGCAGCTGTTAGAAACTC	86.3786	12.5215		5.779	0.461526	6.0492	0.483105	10.4054	0.831003		14.6533		9.8492	0.672149	13.2873	0.906779	13.8337	0.944067
miR5810-y	21	ACGGAACCCTAACGGCGATGT	82.0909	8.765		9.752	1.11261	2.383	0.271877	7.5546	0.861905		7.7993		14.1582	1.81532	19.1716	2.45812	12.5072	1.60363
miR6300-y	18	GTCGTTGTAGTATAGTGA	45.7771	1.8782		6.6819	3.55761	13.9316	7.41753	2.4232	1.29017		3.0725		8.4949	2.76482	5.5047	1.7916	3.7901	1.23356
miR1878-y	24	ATTTGTAGTGTTCAGATTGAGTTC	40.9739	8.1389		1.9865	0.244075	6.5992	0.810822	6.9844	0.85815		5.9086		3.201	0.541753	3.9862	0.674644	4.1691	0.705599
miR2871-y	20	TATTTTAGTTTCTATGGTTT	59.1651	8.765		3.4313	0.391477	8.6156	0.982955	8.6949	0.992002		5.1996		11.9421	2.29673	5.6945	1.09518	6.8221	1.31204
miR396-y	20	TCCACAGGCTTTCTTGACTG	62.5642	11.2693		3.7925	0.336534	13.1983	1.17117	3.9911	0.354157		12.9989		4.8015	0.369377	3.2269	0.248244	9.2857	0.714345
miR437-x	21	TTTGTCCTAAGTCAAACTTCT	74.1927	12.1041		4.3342	0.358077	8.4323	0.696648	14.254	1.17762		9.4538		6.6482	0.70323	9.4909	1.00392	9.4752	1.00226
miR1120-y	24	AAAAATTCTTATATTCTGGGACGG	48.3839	5.0086		3.4313	0.685082	2.383	0.475782	5.8441	1.16681		8.0357		5.6633	0.704767	9.1113	1.13385	8.9066	1.10838
miR394-x	20	TTGGCATTCTGTCCATTTCC	56.6529	6.8868		1.2642	0.183569	7.699	1.11794	5.8441	0.848594		7.3267		9.2336	1.26027	10.0604	1.37311	8.3381	1.13804
miR399-y	19	TGCCAAAGGAGAGTTGCTT	6.2362	1.0435		0.01	0.00958313	5.1327	4.91874	0.01	0.00958313		0.01		0.01	1	0.01	1	0.01	1
miR5827-x	21	TTTGTTGCACTTTGGACCACC	43.9402	7.5129		2.1671	0.288451	8.0657	1.07358	5.274	0.701993		6.3813		4.6784	0.733142	3.9862	0.624669	5.8746	0.920596
miR171-z	21	TTGAGCCGCGTCAATATCTCC	57.9131	11.8954		3.2507	0.273274	9.1655	0.770508	11.6882	0.982582		7.0903		3.4472	0.486185	3.4167	0.481884	7.9591	1.12253
miR477-x	20	TCTCCCTCAAAGGTCTCCAA	79.3496	13.3562		3.2507	0.243385	36.1121	2.70377	13.1136	0.981836		6.3813		2.5854	0.405153	1.3287	0.208218	3.2216	0.50485
miR1871-y	24	ATGGCTCTGATATCATGTTGGTGA	29.2906	6.4694		1.2642	0.195412	2.7497	0.425032	2.7083	0.418632		6.3813		3.0779	0.482331	4.3658	0.684155	2.274	0.356354
miR5083-y	21	GACTACAATTATCTGATCAGA	33.6164	7.7216		0.01	0.00129507	5.1327	0.66472	3.2784	0.424575		5.1996		4.309	0.828718	3.6065	0.693611	4.3586	0.838257
miR5078-y	19	TAGTTCGACCGTGGAATTT	79.1032	12.5215		1.8059	0.144224	8.4323	0.673426	5.559	0.443956		18.1985		8.1256	0.446498	8.7316	0.479798	15.7288	0.864291
miR6220-y	24	GCCTTATATTTTGGGATGGAGGGA	39.0072	4.3825		1.9865	0.45328	0.7332	0.167302	4.2762	0.975744		6.854		5.7864	0.844237	10.6298	1.55089	4.3586	0.635921
miR7782-y	18	AAACCTGCTCTGATACCA	59.0257	8.1389		1.0836	0.133138	6.7825	0.833344	8.2673	1.01578		14.6533		4.5552	0.310865	3.4167	0.233169	12.1282	0.827677
miR5077-x	21	TTCTTCACGTCGGGTTCACCA	52.717	9.8085		1.8059	0.184116	6.2326	0.635428	4.9889	0.50863		12.5262		3.3241	0.265372	4.5556	0.363686	9.4752	0.756431
miR395-y	20	TGAAGTGTTTGGGGAACTCT	73.0034	2.713		2.8895	1.06506	2.7497	1.01353	1.853	0.683008		27.8886		11.2034	0.40172	11.0095	0.394767	12.6967	0.455265
miR5536-y	24	AATGATAGTGACATTATGGTAGAA	34.2126	1.8782		1.4447	0.769194	1.8331	0.975988	4.4187	2.35262		6.3813		5.1708	0.810305	6.0742	0.951875	7.0116	1.09877
miR2121-y	24	GAAAACGGAGTGGTCCATTAGTGC	36.1005	6.2607		2.8895	0.46153	3.1163	0.497756	5.8441	0.933458		4.2542		4.0628	0.955009	4.9353	1.1601	4.7376	1.11363
miR2275-y	22	TTCAGTTTCCTCTAATATCTCG	45.8919	5.0086		2.1671	0.432676	14.1149	2.81813	9.9778	1.99213		4.7269		3.4472	0.729273	3.7964	0.803148	2.653	0.561256
miR398-y	21	TGTGTTCTCAGGTCGCTTCTG	54.1177	3.3391		2.3477	0.703094	5.4993	1.64694	4.9889	1.49409		6.854		9.8492	1.437	9.1113	1.32934	12.1282	1.76951
miR6149-x	21	TTGATACGCACCTGAATCGGC	25.2009	0.01		0.5418	54.18	8.9822	898.22	2.8508	285.08		0.01		10.3416	1034.16	0.5695	56.95	1.895	189.5
miR2863-y	20	TTAGTAGGACTAGAATGGTT	26.0658	3.5477		3.2507	0.916284	2.933	0.826733	2.5657	0.723201		0.9454		5.0477	5.33922	3.6065	3.81479	4.1691	4.40988
miR443-x	24	ATATCATAGTACAATAAATCTGGA	33.4785	7.0955		0.3612	0.0509055	4.2161	0.594194	6.2717	0.883898		4.9632		1.8467	0.372078	4.176	0.841393	4.5481	0.916364
miR384-x	20	TTGGCATTCTGTCCATTTCC	39.7089	3.9651		1.2642	0.318832	4.0328	1.01707	2.4232	0.611132		6.1449		6.8944	1.12197	8.1622	1.32829	6.8221	1.11021
miR1863-y	21	CTCTGATACCATGTGAGGTTT	23.227	3.5477		2.8895	0.814471	2.383	0.671703	2.9933	0.84373		2.5998		3.6934	1.42065	2.2778	0.876144	2.8425	1.09335
miR162-y	22	CTCGATAAACCTCTGCATCCAG	41.6025	5.0086		0.01	0.00199657	8.249	1.64697	5.8441	1.16681		4.0178		4.0628	1.0112	4.7455	1.18112	9.6647	2.40547
miR1846-x	23	TCCCACCGAGCAGCCGGATCTTT	51.5845	7.7216		2.3477	0.304043	5.316	0.688458	7.5546	0.978372		9.6901		4.9246	0.508209	3.9862	0.411368	10.0437	1.03649
miR5795-x	24	GGATGTCGAGATCGAGTTCCCGGC	31.2212	0.8348		0.01	0.0119789	0.3666	0.439147	0.4276	0.512218		8.272		6.8944	0.833462	8.1622	0.986726	6.2536	0.755996
miR5816-x	24	AGGAGCGTTTGTAGGAGTGCCACG	36.4822	5.2173		1.2642	0.242309	2.383	0.45675	3.2784	0.628371		8.0357		4.9246	0.61284	5.3149	0.661411	6.0641	0.754645
miR1441-y	21	ACCGGATGTCGGAAGGGGTTT	29.9144	2.5043		3.4313	1.37016	4.0328	1.61035	5.8441	2.33363		4.2542		2.8316	0.665601	2.6575	0.624677	4.3586	1.02454
miR5162-x	21	ATGACCAAAATACCCCTGGGA	36.2041	6.4694		0.3612	0.0558321	10.0821	1.55843	3.5635	0.550824		6.1449		3.3241	0.540953	3.2269	0.525135	3.032	0.493417
miR5368-y	18	AGGGACAGTCTCAGGTAA	45.2688	5.2173		4.6954	0.899967	16.4979	3.16215	0.7127	0.136603		4.7269		3.9397	0.833464	2.2778	0.48188	7.2011	1.52343
miR2878-x	22	TACATGTATAAAATTCTGAGTT	22.6447	3.9651		3.0701	0.774281	2.5663	0.647222	1.7105	0.431389		1.8908		1.4774	0.781362	3.2269	1.70663	4.7376	2.50561
miR9777-y	20	AGCAAATATATCTGAGCACA	32.6843	6.4694		0.3612	0.0558321	6.4159	0.99173	4.4187	0.683015		4.9632		2.093	0.421704	2.2778	0.458938	5.6851	1.14545
miR814-x	21	TTCATAGGACAACGAATCTGC	35.6468	7.0955		1.9865	0.279966	6.7825	0.955888	3.421	0.482137		6.1449		3.201	0.52092	2.2778	0.370681	4.7376	0.770981
miR399-x	21	GGCAGCTCTCCTCTGGCAGGA	0.08	0.01		0.01	1	0.01	1	0.01	1		0.01		0.01	1	0.01	1	0.01	1
miR5081-y	20	TTGTAGCATACTGATAGTTT	22.5576	3.5477		1.4447	0.407222	0.9166	0.258365	2.5657	0.723201		1.4181		3.9397	2.77815	4.7455	3.34638	3.9796	2.80629
miR166-x	22	AATGACGTCCGGTCTGAAGATT	30.1662	5.2173		1.4447	0.276906	3.6662	0.702701	2.8508	0.546413		5.4359		5.2939	0.973877	2.2778	0.419029	3.9796	0.732096
miR5831-y	24	AGTCAAACTTAGAGTAGTTTGACT	22.0567	3.5477		2.5283	0.712659	1.6498	0.465034	3.2784	0.924092		2.3634		3.5703	1.51066	1.3287	0.562199	3.7901	1.60366
miR5817-x	24	ACATCGAATTTGAAAGAAAAAGGT	30.4373	3.5477		0.01	0.00281873	4.7661	1.34343	5.7016	1.60713		6.3813		3.201	0.501622	4.5556	0.713898	2.274	0.356354
miR393-y	22	CTCAGTGCAATCCCTTTGGAAT	34.2763	4.5912		2.8895	0.629356	6.2326	1.35751	3.5635	0.776159		4.7269		4.309	0.911591	2.6575	0.562208	5.3061	1.12253
miR5815-x	24	AATGCTATGGACACTAGATGATAT	29.2634	3.9651		0.01	0.002522	1.0999	0.277395	3.706	0.934655		6.1449		2.5854	0.420739	1.7084	0.278019	10.0437	1.63448
miR1430-y	21	TGGTGAGCCTTCATGGCTAAA	26.2097	2.0869		9.2102	4.41334	1.8331	0.878384	3.5635	1.70756		1.4181		2.2161	1.56272	4.3658	3.07863	1.516	1.06904
miR164-x	23	TGGAGAAGCAGGGCACGTTTTTT	22.1643	2.0869		1.2642	0.605779	3.2996	1.5811	1.9956	0.956251		3.5452		2.9548	0.833465	3.7964	1.07086	3.2216	0.908722
miR166-z	23	TCGGACCAGGCTTCATTCCTTCT	23.294	2.2956		0.7224	0.314689	6.9658	3.03441	1.7105	0.745121		4.2542		1.8467	0.434089	1.8982	0.446194	3.6006	0.846364
miR5049-y	24	ACTACACTTATTTTGGAACGGAGG	25.1909	3.9651		1.6253	0.409901	3.8495	0.970846	2.2806	0.575168		6.6176		1.3543	0.204651	1.7084	0.25816	3.7901	0.57273
miR528-x	19	TGGAAGGGGCATGCAGATT	19.625	0.01		2.3477	234.77	1.4665	146.65	1.7105	171.05		2.3634		6.402	2.70881	5.3149	2.24884	0.01	0.00423119
miR5540-y	24	GGTTGTGCAAGATCGACGGTATAT	20.343	1.6695		1.0836	0.649057	0.5499	0.32938	1.4254	0.853789		3.5452		2.5854	0.729268	5.3149	1.49918	4.1691	1.17598
miR408-y	21	CTGCACTGCCTCTTCTTTGGC	16.3819	0.01		0.01	1	1.0999	109.99	0.2851	28.51		5.4359		4.8015	0.883294	1.1389	0.209515	3.6006	0.662374
miR5567-x	24	AATGCTTCATGCATGTGTCCAAAG	21.6054	0.8348		0.7224	0.865357	1.4665	1.75671	2.9933	3.58565		4.0178		4.5552	1.13375	2.2778	0.566927	4.7376	1.17915
miR6476-x	18	AGTGGGGATGAAACATGC	25.6475	3.5477		3.973	1.11988	2.7497	0.775066	3.8486	1.08482		2.3634		2.3392	0.989761	2.2778	0.963781	4.5481	1.92439
miR7695-x	21	TTGCCTACGTGGCACGTCACG	21.3963	0.8348		10.8356	12.9799	1.2832	1.53713	1.853	2.21969		0.01		2.2161	221.61	3.0371	303.71	1.3265	132.65
miR810-y	21	AACACCGATATGCGTCATCAA	25.4778	5.426		0.3612	0.0665684	4.2161	0.777018	3.2784	0.604202		4.7269		1.9698	0.416721	2.2778	0.48188	3.2216	0.681546
miR4995-x	20	GGCAGTGGCTTGGTTAAGGA	2.3387	0.01		0.01	1	1.2832	128.32	0.01	1		0.01		0.2462	24.62	0.7593	75.93	0.01	1
miR6485-x	20	CCTAGGATGTAGAAGATCAT	17.7584	1.2521		4.3342	3.46154	0.9166	0.73205	0.5702	0.455395		2.1271		3.8166	1.79427	2.4676	1.16008	2.274	1.06906
miR1879-y	24	GTGTTTGGTTTATGGATCAGGTGG	19.1715	1.6695		3.0701	1.83893	1.0999	0.65882	2.7083	1.62222		1.4181		3.3241	2.34405	4.176	2.94479	1.7055	1.20267
miR6251-x	22	CTGTGTAGCCACATTGTAAGGG	23.3668	3.5477		4.6954	1.32351	1.2832	0.361699	1.5679	0.441948		0.9454		4.309	4.55786	3.9862	4.21642	3.032	3.20711
miR815-y	24	AGGAGTGGATTGAGGAGATTGGGA	18.8645	4.1738		1.0836	0.25962	2.933	0.702717	5.7016	1.36605		1.4181		1.8467	1.30224	1.3287	0.936958	0.379	0.267259
miR1432-x	22	ATCAGGAGAGATGACATTGACA	22.8961	2.713		0.01	0.00368596	1.0999	0.405418	4.4187	1.62871		2.8361		2.3392	0.824795	2.4676	0.870068	7.0116	2.47227
miR394-y	22	AGGTGGGCATACTGCCAATGGT	7.2966	0.4174		1.8059	4.32655	0.01	0.0239578	0.2851	0.683038		0.01		1.3543	135.43	1.7084	170.84	1.7055	170.55
miR1883-x	21	TGACGGGCCGAGAATGGAACT	13.9408	2.9217		1.4447	0.494472	2.0164	0.690146	1.5679	0.53664		0.4727		1.7236	3.64629	2.2778	4.8187	1.516	3.20711
miR2103-x	21	TTTTTCCCTCTCCGAGCGTGC	18.5322	0.4174		0.7224	1.73071	6.2326	14.932	2.9933	7.1713		1.1817		3.5703	3.02133	2.088	1.76695	1.3265	1.12254
miR159-x	20	AGCTCCCTTCGATCCAATCT	14.2435	1.6695		0.01	0.00598982	1.2832	0.768613	0.7127	0.426894		2.8361		1.4774	0.520927	0.5695	0.200804	5.6851	2.00455
miR2880-x	24	GGAATCCCGTTGGGACAGGATGAT	14.7086	1.8782		2.5283	1.34613	0.9166	0.48802	2.1381	1.13838		1.1817		2.4623	2.08369	1.7084	1.44571	1.895	1.60362
miR5144-x	21	TCTTTGTGCTGCTGAAGAGAC	15.1176	5.6347		2.8895	0.512805	0.3666	0.0650611	1.7105	0.303565		1.6544		1.7236	1.04183	0.7593	0.458958	0.379	0.229086
miR5568-y	24	ATGTCTTATATTTTGGAATGGAGG	11.3907	0.8348		0.5418	0.649018	1.2832	1.53713	1.2829	1.53678		0.9454		2.7085	2.86492	2.4676	2.61011	1.3265	1.40311
miR2120-y	24	AAGATCTTTAGTCCCGATTGTTGT	12.6274	0.4174		1.0836	2.59607	1.0999	2.63512	1.853	4.43939		2.3634		2.5854	1.09393	1.8982	0.803165	1.3265	0.561268
miR845-x	20	TCTGATACCAATTGTTGGAC	10.8983	0.01		4.876	487.6	0.5499	54.99	0.5702	57.02		0.01		1.8467	184.67	2.088	208.8	0.9475	94.75
miR1320-y	22	GTAAAATTCATTCGTTCCAATT	15.145	1.4608		1.0836	0.741785	2.1997	1.50582	2.4232	1.65882		1.1817		1.108	0.937632	1.7084	1.44571	3.9796	3.36769
miR2090-x	24	AACTCTGATTCTAGAATTTTTGCA	10.8403	1.0435		0.01	0.00958313	0.5499	0.526977	1.4254	1.36598		2.1271		2.4623	1.15759	0.3796	0.178459	2.8425	1.33633
miR1873-x	24	TCAACATGGTATCAGAGCTGGATT	20.4246	4.1738		0.7224	0.17308	1.8331	0.439192	1.2829	0.30737		5.4359		1.4774	0.271786	2.088	0.384113	3.4111	0.627513
miR1850-x	22	CTGGAAAGTTGGGAGATTGGGG	13.464	2.0869		3.4313	1.64421	0.7332	0.351335	0.2851	0.136614		1.4181		2.4623	1.73634	3.0371	2.14167	0.01	0.00705169
miR1444-x	20	TCGAACGTTGACCGGATGTC	12.6642	2.713		0.01	0.00368596	0.9166	0.337855	1.4254	0.525396		0.9454		1.7236	1.82314	1.8982	2.00783	3.032	3.20711
miR2876-y	23	TTCCTATATGAACACTGTTGCCT	9.3911	0.4174		0.5418	1.29804	1.4665	3.51342	1.2829	3.07355		0.709		3.0779	4.34118	0.3796	0.535402	1.516	2.13822
miR5147-y	24	GTACAACTTTTGTGGATGGAGGGA	9.4893	2.713		2.5283	0.93192	0.3666	0.135127	0.8552	0.315223		0.01		1.108	110.8	1.8982	189.82	0.01	1
miR3980-x	23	AATCGACGGCCTCAGTCAGGGGA	7.066	0.4174		3.4313	8.22065	2.7497	6.58769	0.4276	1.02444		0.01		0.01	1	0.01	1	0.01	1
miR1423-y	23	AGCGCCCAAGCGGTAGTTGTCTT	14.4481	1.8782		0.3612	0.192312	0.7332	0.390374	1.853	0.986583		2.8361		1.4774	0.520927	1.7084	0.602377	3.6006	1.26956
miR5150-x	24	AGCTTCTGTCAGCTGCAGCTTCTC	13.453	2.0869		0.3612	0.17308	1.8331	0.878384	0.7127	0.341511		1.6544		0.7387	0.446506	1.1389	0.688407	4.9271	2.97818
miR6225-y	21	ACGAATCTTTTGAGACTAATT	14.6151	2.0869		0.01	0.0047918	0.9166	0.439216	2.1381	1.02453		2.1271		2.2161	1.04184	2.2778	1.07085	2.8425	1.33633
miR5239-x	21	TGGGAGAAAAGATAGAATGTG	32.2818	0.01		0.01	1	21.0807	2108.07	0.2851	28.51		0.01		0.2462	24.62	10.6298	1062.98	0.01	1
miR5752-y	21	CATTGTTTGGTTTAGTACAAA	11.5722	0.01		0.01	1	6.9658	696.58	0.5702	57.02		0.01		0.01	1	3.9862	398.62	0.01	1
miR5833-x	22	CTTCCTCCTCGGGCTCATCGGG	13.4049	1.0435		1.8059	1.73062	2.0164	1.93234	3.5635	3.41495		0.4727		1.8467	3.90671	1.8982	4.01565	0.758	1.60355
miR172-y	23	AGAATCTTGATGATGCTGCATTT	6.629	0.01		3.973	397.3	0.01	1	0.01	1		0.01		1.8467	184.67	0.7593	75.93	0.01	1
miR6224-y	24	GCCTTATATTATAGGACGGAGGGA	9.0407	0.4174		2.8895	6.92262	0.01	0.0239578	0.7127	1.70747		1.4181		0.3693	0.260419	1.3287	0.936958	1.895	1.3363
miR5384-y	21	GGTGAGTGCGCCGCCGTCGAG	7.4276	1.0435		3.4313	3.28826	0.5499	0.526977	0.9978	0.956205		0.01		0.2462	24.62	1.1389	113.89	0.01	1
miR7694-y	24	GTCCAGATTCGTAGTTCTAGGTGG	10.7337	4.1738		1.0836	0.25962	0.7332	0.175667	2.4232	0.580574		0.9454		0.9849	1.04178	0.3796	0.401523	0.01	0.0105775
miR5205-x	24	CCTATAATTTGGGACGGAGGGAGT	9.6258	1.8782		0.7224	0.384624	0.3666	0.195187	1.9956	1.06251		0.4727		1.7236	3.64629	1.8982	4.01565	0.5685	1.20267
miR5154-y	24	AGCGCCAGTTGACGTGACGTTGAG	6.4599	1.2521		1.2642	1.00966	0.01	0.00798658	0.8552	0.683013		0.709		1.2311	1.73639	0.7593	1.07094	0.379	0.534556
[truncated: 1,323 more rows]

## Sheet: original-rep2
Original data of miRNAs expression (replicate 2)
[truncated: 2,032 more rows]

[truncated: 1 more sheets: original-rep3]
