# Supplementary material for: Identification of miRNAs Contributing to the Broad-Spectrum and Durable Blast Resistance in the Yunnan Local Rice Germplasm
Source: Front Plant Sci. 2021 Oct 14;12:749919. doi: 10.3389/fpls.2021.749919 (PMC8551726; doi:10.3389/fpls.2021.749919)
Supplement: Supplementary file 3 [file Table_3.XLSX]

## Sheet: MSU
Table S3 Target prediction of significantly differentially expressed miRNAs
miRNA ID	sequence	Expect a	rice gene ID (MSU) b	rice gene ID (RAP) c	alignment							Target Description	Inhibition	Multiplicity d
up-regulated
osa-miR2877	TTGCATCCTCTGCACTTTGGGCCT	2	LOC_Os03g50500.1	Os03g0712900	miRNA 24 UCCGGGUUUCACGUCUCCUACGUU 1 ::.:: :::::::.::::: Target 1675 AUUGACAGAGGGCAGAGGGUGCAA 1698							cDNA|PPR repeat domain containing protein, putative, expressed	Cleavage	1
			/	Os06g0188550-01	miRNA 24 UCCGGGUUUCACGUCUCCUACGUU 1 ::.::::: :::::::::. Target 2017 UACUACAGAGUGCUGAGGAUGCAG 2040							Conserved hypothetical protein.	Translation
		2.5	LOC_Os03g12950.1	Os03g0232200	miRNA 24 UCCGGGUUUCACGUCUCCUACGUU 1 ::: ::::. ::::::::::::: Target 620 AGGGCCAAGAAGCAGAGGAUGCAA 643							cDNA|AP2-like ethylene-responsive transcription factor AINTEGUMENTA, putative, expressed	Cleavage	1
			/	Os08g0157100-01	miRNA 24 UCCGGGUUUCACGUCUCCUACGUU 1 ....:::::::::: :::::: Target 1548 AAUUUUGAAGUGCAGAGUAUGCAA 1571							RNA polymerase II-associated, Paf1 domain containing protein.	Cleavage
		2.5	LOC_Os03g44484.1	Os03g0646800	miRNA 24 UCCGGGUUUCACGUCUCCUACGUU 1 :.. .::::::::::.::::: Target 1622 UUCCUUUGAGUGCAGAGGGUGCAA 1645							cDNA|DNA-directed RNA polymerase II subunit RPB2, putative, expressed	Cleavage	1
			/	Os12g0566050-00	miRNA 24 UCCGGGUUUCACGUCUCCUACGUU 1 : : :::::::::: :::::: : Target 1572 UGCCACAAAGUGCAGUGGAUGCCA 1595							Hypothetical protein.	Translation
		2.5	LOC_Os08g06070.1	Os08g0157100	miRNA 24 UCCGGGUUUCACGUCUCCUACGUU 1 ....:::::::::: :::::: Target 1548 AAUUUUGAAGUGCAGAGUAUGCAA 1571							cDNA|ELF7, putative, expressed	Cleavage	1
		2.5	LOC_Os03g44484.2	Os03g0646800	miRNA 24 UCCGGGUUUCACGUCUCCUACGUU 1 :.. .::::::::::.::::: Target 1005 UUCCUUUGAGUGCAGAGGGUGCAA 1028							cDNA|DNA-directed RNA polymerase II subunit RPB2, putative, expressed	Cleavage	1
		2.5	LOC_Os05g47970.1	Os05g0552900	miRNA 24 UCCGGGUUUCACGUCUCCUACGUU 1 : ::: :::::::::::::. Target 887 GAAACAAAAAUGCAGAGGAUGCAG 910							cDNA|microtubule associated protein, putative, expressed	Cleavage	1
			/	Os02g0777800-01	miRNA 24 UCCGGGUUUCACGUCUCCUACGUU 1 .: . ::::::::::. :.::::. Target 2850 GGAUGCAAAGUGCAGGAGGUGCAG 2873							Protein kinase, catalytic domain domain containing protein.	Cleavage
osa-miR1432-3p	CAGGTGTCATCTCCCCTGAAC	2.5	LOC_Os03g53990.1	/	miRNA 21 CAAGUCCCCUCUACUGUGGAC 1 ..::::::::::.::::: Target 3362 GGAUGGGGGAGAUGAUACCUG 3382							cDNA|expressed protein	Cleavage	1
		2.5	LOC_Os09g36810.1	Os09g0539200	miRNA 21 CAAGUCCCCUCUACUGUGGAC 1 : : ::: :::::::::.::: Target 2133 GGUGAGGAGAGAUGACAUCUG 2153							cDNA|beta-galactosidase precursor, putative, expressed	Cleavage	1
			/	Os07g0296000-01	miRNA 21 CAAGUCCCCUCUACUGUGGAC 1 :::::::::::.::::: Target 2815 AGGAAGGGGAGAUGAUACCUG 2835							Conserved hypothetical protein.	Cleavage
osa-miR7695-5p	TGCCTATGTGGCACGCCACGTGAA	1.5	LOC_Os04g47555.1	Os04g0563350	miRNA 24 AAGUGCACCGCACGGUGUAUCCGU 1 : :::::::: ::::::.:::::: Target 971 UCCACGUGGCAUGCCACGUAGGCA 994							cDNA|expressed protein	Cleavage	1
		2	LOC_Os12g30170.1	Os12g0486800	miRNA 24 AAGUGCACCGCACGGUGUAUCCGU 1 :...::::::::::::.: :::: Target 2264 CUUGUGUGGCGUGCCACGUCGGCA 2287							cDNA|expressed protein	Cleavage	1
		2	LOC_Os05g19540.1	/	miRNA 19 CACCGCACGGUGUAUCCGU 1 :::: ::::::::::::: Target 1 AUGGCAUGCCACAUAGGCA 19							cDNA|retrotransposon protein, putative, Ty1-copia subclass, expressed	Cleavage	1
		2.5	LOC_Os01g17300.1	Os01g0280200	miRNA 24 AAGUGCACCGCACGGUGUAUCCGU 1 : ::: : :::::::::.:::::: Target 1366 UCCACAUUGCGUGCCACGUAGGCA 1389							cDNA|expressed protein	Cleavage	1
		2.5	LOC_Os07g14280.1	Os07g0246300	miRNA 24 AAGUGCACCGCACGGUGUAUCCGU 1 ...::::::::.:.:::.::: Target 363 CCUGUGUGGCGUGUCGCAUGGGCC 386							cDNA|WD domain, G-beta repeat domain containing protein, expressed	Cleavage	1
			/	Os01g0310550-01	miRNA 24 AAGUGCACCGCACGGUGUAUCCGU 1 : :::::: .:::::::.:::::: Target 20 UCCACGUGAUGUGCCACGUAGGCA 43							Non-protein coding transcript.	Cleavage
			/	Os09g0545051-00	miRNA 24 AAGUGCACCGCACGGUGUAUCCGU 1 : :::::::::::::::.:: :.: Target 821 UCCACGUGGCGUGCCACGUAUGUA 844							Conserved hypothetical protein.	Cleavage
			/	Os09g0491740-01	miRNA 24 AAGUGCACCGCACGGUGUAUCCGU 1 :.::::: : ::::.:::::: Target 1617 CCGAUGUGGCAUUCCACGUAGGCA 1640							Auxin efflux carrier domain containing protein.	Cleavage
osa-miR5082	TGCGATGATGGCCGCGCGGGTTCA	1	LOC_Os05g49480.1	Os05g0569900	miRNA 24 ACUUGGGCGCGCCGGUAGUAGCGU 1 :::::::::::::.::::. Target 65 CGCCGCCGCGCGGCCAUCGUCGCG 88							cDNA|transcription factor-related, putative, expressed	Cleavage	1
		2.5	LOC_Os04g56370.1	Os04g0658800	miRNA 24 ACUUGGGCGCGCCGGUAGUAGCGU 1 ::. :.:::::::::.::.:::: Target 16 UGGUCUCGCGCGGCCGUCGUCGCC 39							cDNA|expressed protein	Cleavage	1
		2.5	LOC_Os10g36770.1	/	miRNA 24 ACUUGGGCGCGCCGGUAGUAGCGU 1 ::::::: ::.:::::::. Target 238 CCCGGCCGCGCGACCGUCAUCGCG 261							cDNA|expressed protein	Cleavage	1
			/	Os07g0409400-01	miRNA 24 ACUUGGGCGCGCCGGUAGUAGCGU 1 ::::.:: ::::::::::: Target 540 CUCCCCCGUGCCGCCAUCAUCGCC 563							Mitochodrial transcription termination factor-related family protein.	Cleavage
osa-miR159f	CTTGGATTGAAGGGAGCTCTA	1.5	LOC_Os01g12700.1	Os01g0226800	miRNA 21 AUCUCGAGGGAAGUUAGGUUC 1 :.::::::::::.::::::: Target 803 UGGAGCUCCCUUUAAUCCAAU 823							cDNA|MYB family transcription factor, putative	Cleavage	1
		1.5	LOC_Os05g41166.1	Os05g0490600	miRNA 21 AUCUCGAGGGAAGUUAGGUUC 1 :.::::::::::.::::::: Target 1068 UGGAGCUCCCUUUAAUCCAAU 1088							cDNA|MYB family transcription factor, putative, expressed	Cleavage	1
		1.5	LOC_Os01g59660.1	Os01g0812000	miRNA 21 AUCUCGAGGGAAGUUAGGUUC 1 :.:::::::::::: :::::: Target 1260 UGGAGCUCCCUUCACUCCAAG 1280							cDNA|MYB family transcription factor, putative, expressed	Cleavage	1
		1.5	LOC_Os01g59660.4	Os01g0812000	miRNA 21 AUCUCGAGGGAAGUUAGGUUC 1 :.:::::::::::: :::::: Target 1180 UGGAGCUCCCUUCACUCCAAG 1200							cDNA|MYB family transcription factor, putative, expressed	Cleavage	1
		1.5	LOC_Os01g59660.3	Os01g0812000	miRNA 21 AUCUCGAGGGAAGUUAGGUUC 1 :.:::::::::::: :::::: Target 1258 UGGAGCUCCCUUCACUCCAAG 1278							cDNA|MYB family transcription factor, putative, expressed	Cleavage	1
		1.5	LOC_Os01g59660.2	Os01g0812000	miRNA 21 AUCUCGAGGGAAGUUAGGUUC 1 :.:::::::::::: :::::: Target 1348 UGGAGCUCCCUUCACUCCAAG 1368							cDNA|MYB family transcription factor, putative, expressed	Cleavage	1
		2	LOC_Os10g05230.2	Os10g0142100	miRNA 21 AUCUCGAGGGAAGUUAGGUUC 1 ::::::::::::::::: Target 335 UUUUGCUCCCUUCAAUCCAAG 355							cDNA|zinc finger, C3HC4 type domain containing protein, expressed	Cleavage	1
		2.5	LOC_Os06g40330.1	Os06g0605600	miRNA 21 AUCUCGAGGGAAGUUAGGUUC 1 :::::::::::::: ::::: Target 1418 UAGAGCUCCCUUCACUCCAAU 1438							cDNA|MYB family transcription factor, putative, expressed	Cleavage	1
		2.5	LOC_Os09g36650.1	/	miRNA 21 AUCUCGAGGGAAGUUAGGUUC 1 .::::::: :::::::::: Target 699 CGGAGCUCCAUUCAAUCCAAC 719							cDNA|expressed protein	Cleavage	1
		2.5	LOC_Os03g38210.1	Os03g0578900	miRNA 21 AUCUCGAGGGAAGUUAGGUUC 1 ::::::::::::: :::: Target 938 CCGAGCUCCCUUCAAGCCAAU 958							cDNA|MYB family transcription factor, putative, expressed	Cleavage	1
			/	Os01g0507000-02	miRNA 21 AUCUCGAGGGAAGUUAGGUUC 1 : :::::::.:::..::::: Target 448 UUGAGCUCCUUUCGGUCCAAA 468							Conserved hypothetical protein.	Cleavage
			/	Os09g0570900-01	miRNA 21 AUCUCGAGGGAAGUUAGGUUC 1 :::: .::: ::::::::: Target 158 GCGAGCGUCCUCCAAUCCAAG 178							Amino acid-binding ACT domain containing protein.	Translation
			/	Os05g0492100-01	miRNA 21 AUCUCGAGGGAAGUUAGGUUC 1 : ::::.::: :::::::: Target 1824 GCGUGCUCUCUUAAAUCCAAG 1844							Hypothetical protein.	Translation
osa-miR399j	TGCCAAAGGAGAGTTGCCCTA	1.5	LOC_Os05g48390.1	Os05g0557700	miRNA 21 AUCCCGUUGAGAGGAAACCGU 1 :::::::: :::::::::::: Target 821 UAGGGCAAAUCUCCUUUGGCA 841							cDNA|ubiquitin conjugating enzyme protein, putative, expressed	Cleavage	6
		1.5	LOC_Os05g48390.1	Os05g0557700	miRNA 21 AUCCCGUUGAGAGGAAACCGU 1 : :::::: :::::::::::: Target 950 UCGGGCAAAUCUCCUUUGGCA 970							cDNA|ubiquitin conjugating enzyme protein, putative, expressed	Cleavage	6
		1.5	LOC_Os05g48390.1	Os05g0557700	miRNA 21 AUCCCGUUGAGAGGAAACCGU 1 : :::::: :::::::::::: Target 1033 UUGGGCAAAUCUCCUUUGGCA 1053							cDNA|ubiquitin conjugating enzyme protein, putative, expressed	Cleavage	6
		1.5	LOC_Os05g48390.1	Os05g0557700	miRNA 21 AUCCCGUUGAGAGGAAACCGU 1 :::::: :::::::::::: Target 988 CCGGGCAAAUCUCCUUUGGCA 1008							cDNA|ubiquitin conjugating enzyme protein, putative, expressed	Cleavage	6
		1.5	LOC_Os05g48390.1	Os05g0557700	miRNA 21 AUCCCGUUGAGAGGAAACCGU 1 :::::: :::::::::::: Target 904 CUGGGCAAAUCUCCUUUGGCA 924							cDNA|ubiquitin conjugating enzyme protein, putative, expressed	Cleavage	6
		1.5	LOC_Os08g45000.1	Os08g0564000	miRNA 21 AUCCCGUUGAGAGGAAACCGU 1 :::::::::::.::::::: Target 292 CAGGGCAACUCUUCUUUGGCU 312							cDNA|inorganic phosphate transporter, putative, expressed	Cleavage	1
		2	LOC_Os05g48390.1	Os05g0557700	miRNA 21 AUCCCGUUGAGAGGAAACCGU 1 ::.::.:::::::::::: Target 1147 CGUGGUAAUUCUCCUUUGGCA 1167							cDNA|ubiquitin conjugating enzyme protein, putative, expressed	Cleavage	6
		2	LOC_Os05g45350.2	Os05g0529700	miRNA 21 AUCCCGUUGAGAGGAAACCGU 1 .:::::: :.:::::::::: Target 1110 CGGGGCAAAUUUCCUUUGGCA 1130							cDNA|dnaJ domain containing protein, expressed	Cleavage	1
		2	LOC_Os10g31864.1	Os10g0456950	miRNA 21 AUCCCGUUGAGAGGAAACCGU 1 :::::.:.:::::::::: Target 4083 GCAGGCAAUUUUCCUUUGGCA 4103							cDNA|expressed protein	Cleavage	1
		2.5	LOC_Os04g55230.1	Os04g0645100	miRNA 21 AUCCCGUUGAGAGGAAACCGU 1 : ::.::::::::::::: Target 4032 CUAGCCAGCUCUCCUUUGGCA 4052							cDNA|tetratricopeptide repeat domain containing protein, putative, expressed	Cleavage	1
osa-miR393b-3p	TCAGTGCAATCCCTTTGGAAT	2	LOC_Os11g13910.1	Os11g0243100	miRNA 21 UAAGGUUUCCCUAACGUGACU 1 : ::..:::::::::..:::: Target 305 AAUCUGAAGGGAUUGUGCUGA 325							cDNA|expressed protein	Cleavage	1
		2	LOC_Os04g58734.1	Os04g0684100	miRNA 21 UAAGGUUUCCCUAACGUGACU 1 : ::::::::::: :::.::: Target 209 ACUCCAAAGGGAUCGCAUUGA 229							cDNA|expressed protein	Cleavage	1
		2.5	LOC_Os08g09860.1	Os08g0198700	miRNA 21 UAAGGUUUCCCUAACGUGACU 1 :.:::.: ::::::::::: Target 317 GGUUCAAGGCGAUUGCACUGA 337							cDNA|hydroxyacid oxidase 1, putative, expressed	Cleavage	1
			/	Os11g0209300-00	miRNA 21 UAAGGUUUCCCUAACGUGACU 1 :::.:::: ::::::.::: Target 691 GAUCCGAAGGCAUUGCAUUGA 711							Hypothetical protein.	Translation
			/	Os08g0198700-01	miRNA 21 UAAGGUUUCCCUAACGUGACU 1 :.:::.: ::::::::::: Target 975 GGUUCAAGGCGAUUGCACUGA 995							Similar to Glycolate oxidase (EC 1.1.3.15) (Fragment)	Cleavage
			/	Os05g0495250-00	miRNA 21 UAAGGUUUCCCUAACGUGACU 1 ::...:::::: :::::::: Target 127 UUUUUGAAGGGACUGCACUGA 147							Non-protein coding transcript	Translation
			/	Os04g0395651-00	miRNA 21 UAAGGUUUCCCUAACGUGACU 1 ::::::::::: :::.:: Target 81 CAUCCAAAGGGAUCGCAUUGU 101							Hypothetical protein	Cleavage
			/	Os03g0116700-01	miRNA 21 UAAGGUUUCCCUAACGUGACU 1 ::::::: : :::.::::: Target 1556 GCUCCAAAGUGCUUGUACUGA 1576							Cyclin-like F-box domain containing protein.	Translation
		2.5	LOC_Os07g01540.1	Os07g0106000	miRNA 21 UAAGGUUUCCCUAACGUGACU 1 : ::::. ::::::::.:::. Target 2354 ACUCCAGCGGGAUUGCGCUGG 2374							cDNA|Ser/Thr protein phosphatase family protein, putative, expressed	Cleavage	1
osa-miR408-3p	CTGCACTGCCTCTTCCCTGGC	0	LOC_Os03g15340.1	Os03g0259100	miRNA 21 CGGUCCCUUCUCCGUCACGUC 1 :::::::::::::::::::: Target 85 CCCAGGGAAGAGGCAGUGCAG 105							cDNA|plastocyanin-like domain containing protein, putative, expressed	Cleavage	1
		1.5	LOC_Os06g15600.1	Os06g0266400	miRNA 21 CGGUCCCUUCUCCGUCACGUC 1 :::.:::::::::::::::: Target 54 GCCGGGGAAGAGGCAGUGCAA 74							cDNA|plastocyanin-like domain containing protein, putative, expressed	Cleavage	1
		1.5	LOC_Os01g03530.1	Os01g0126100	miRNA 21 CGGUCCCUUCUCCGUCACGUC 1 :::. :::::::::::::::: Target 1551 GCCGAGGAAGAGGCAGUGCAG 1571							cDNA|multicopper oxidase domain containing protein, expressed	Cleavage	1
		1.5	LOC_Os01g03530.2	Os01g0126100	miRNA 21 CGGUCCCUUCUCCGUCACGUC 1 :::. :::::::::::::::: Target 1379 GCCGAGGAAGAGGCAGUGCAG 1399							cDNA|multicopper oxidase domain containing protein, expressed	Cleavage	1
		1.5	LOC_Os03g50140.1	Os03g0709100	miRNA 21 CGGUCCCUUCUCCGUCACGUC 1 .:.:::::::::::::::: Target 252 CUCGGGGAAGAGGCAGUGCAA 272							cDNA|plastocyanin-like domain containing protein, putative, expressed	Cleavage	1
		1.5	LOC_Os02g49850.1	Os02g0731400	miRNA 21 CGGUCCCUUCUCCGUCACGUC 1 .:.:::::::::::::::: Target 130 CUCGGGGAAGAGGCAGUGCAU 150							cDNA|plastocyanin-like domain containing protein, putative, expressed	Cleavage	1
		2	LOC_Os03g49820.1	Os03g0705433	miRNA 21 CGGUCCCUUCUCCGUCACGUC 1 ::.::: ::::::.:::::: Target 131 ACCGGGGCAGAGGCGGUGCAG 151							cDNA|expressed protein	Cleavage	1
		2	LOC_Os03g50160.1	Os03g0709300	miRNA 21 CGGUCCCUUCUCCGUCACGUC 1 .::::::::.:::::::: : Target 117 CUCAGGGAAGGGGCAGUGCUG 137							cDNA|plastocyanin-like domain containing protein, putative, expressed	Cleavage	1
		2	LOC_Os01g02110.1	Os01g0111500	miRNA 21 CGGUCCCUUCUCCGUCACGUC 1 :.::::::: ::::::::: Target 730 AGCGGGGAAGAAGCAGUGCAG 750							cDNA|helix-loop-helix DNA-binding domain containing protein, expressed	Translation	1
		2	LOC_Os07g43540.1	Os07g0628600	miRNA 21 CGGUCCCUUCUCCGUCACGUC 1 : ::::: ::::::.::::.: Target 184 GACAGGGCAGAGGCGGUGCGG 204							cDNA|ORC6 - Putative origin recognition complex subunit 6, expressed	Cleavage	1
		2.5	LOC_Os04g22990.1	Os04g0296034	miRNA 21 CGGUCCCUUCUCCGUCACGUC 1 .::: :.:::::::::::: Target 4552 UUCAGCGGAGAGGCAGUGCAA 4572							cDNA|retrotransposon protein, putative, unclassified, expressed	Cleavage	1
		2.5	ChrSy.fgenesh.mRNA.77	/	miRNA 21 CGGUCCCUUCUCCGUCACGUC 1 .::: :.:::::::::::: Target 1606 UUCAGCGGAGAGGCAGUGCAA 1626							cDNA|expressed protein	Cleavage	1
		2.5	LOC_Os05g42010.2	Os05g0499450	miRNA 21 CGGUCCCUUCUCCGUCACGUC 1 : :.:::.:::::..::::.: Target 323 GGCGGGGGAGAGGUGGUGCGG 343							cDNA|TraB family protein, putative, expressed	Cleavage	1
		2.5	LOC_Os05g42010.1	Os05g0499450	miRNA 21 CGGUCCCUUCUCCGUCACGUC 1 : :.:::.:::::..::::.: Target 323 GGCGGGGGAGAGGUGGUGCGG 343							cDNA|TraB family protein, putative, expressed	Cleavage	1
		2.5	LOC_Os05g01790.1	Os05g0108400	miRNA 21 CGGUCCCUUCUCCGUCACGUC 1 : :.: ::.:::::.:::::: Target 844 GACGGCGAGGAGGCGGUGCAG 864							cDNA|expressed protein	Cleavage	1
			/	Os07g0628600-00	miRNA 21 CGGUCCCUUCUCCGUCACGUC 1 : ::::: ::::::.::::.: Target 192 GACAGGGCAGAGGCGGUGCGG 212							Origin recognition complex subunit 6 family protein.	Cleavage
			/	Os04g0538800-01	miRNA 21 CGGUCCCUUCUCCGUCACGUC 1 : :.:::: ::::..:::::: Target 293 GGCGGGGAUGAGGUGGUGCAG 313							Similar to Kinesin heavy chain (Fragment)	Cleavage
			/	Os02g0550500-00	miRNA 21 CGGUCCCUUCUCCGUCACGUC 1 :: ::.:::::::::::: Target 43 AGAAGAGAGGAGGCAGUGCAG 63							Hypothetical conserved gene	Cleavage
			/	Os08g0337601-00	miRNA 21 CGGUCCCUUCUCCGUCACGUC 1 :: ::.:::::::::::: Target 19 AGAAGAGAGGAGGCAGUGCAG 39							Hypothetical conserved gene	Cleavage
			/	Os04g0195400-00	miRNA 21 CGGUCCCUUCUCCGUCACGUC 1 :: ::.:::::::::::: Target 19 AGAAGAGAGGAGGCAGUGCAG 39							Transposase, MuDR, plant domain containing protein.	Cleavage
			/	Os07g0152200-01	miRNA 21 CGGUCCCUUCUCCGUCACGUC 1 :::::::: ::.:::::: Target 2482 AGCAGGGAAGCAGCGGUGCAG 2502							Similar to predicted protein	Translation
			/	Os03g0742300-01	miRNA 21 CGGUCCCUUCUCCGUCACGUC 1 :.::::.: :::.:::::: Target 142 AACGGGGAGGUGGCGGUGCAG 162							Signal transduction response regulator, receiver region domain containing protein	Translation
osa-miR528-5p	TGGAAGGGGCATGCAGAGGAG	2	LOC_Os06g06050.1	Os06g0154200	miRNA 21 GAGGAGACGUACGGGGAAGGU 1 .:::::::: ::::.:::::: Target 2648 UUCCUCUGCUUGCCUCUUCCA 2668							cDNA|OsFBL27 - F-box domain and LRR containing protein, expressed	Cleavage	1
		2	LOC_Os08g42640.1	Os08g0539300	miRNA 21 GAGGAGACGUACGGGGAAGGU 1 :::: ::::::.::::::.: Target 630 AUCCUGUGCAUGUCCCUUCUA 650							cDNA|zinc finger, C3HC4 type domain containing protein, expressed	Cleavage	1
		2.5	LOC_Os08g04310.1	Os08g0137400	miRNA 21 GAGGAGACGUACGGGGAAGGU 1 :::.::::: ::::.:::::: Target 247 CUCUUCUGCUUGCCUCUUCCA 267							cDNA|plastocyanin-like domain containing protein, putative, expressed	Cleavage	1
		2.5	LOC_Os06g37150.1	Os06g0567900	miRNA 21 GAGGAGACGUACGGGGAAGGU 1 :::::: :::::::: ::::: Target 2000 CUCCUCAGCAUGCCCAUUCCA 2020							cDNA|L-ascorbate oxidase precursor, putative, expressed	Cleavage	1
			/	Os07g0570550-00	miRNA 21 GAGGAGACGUACGGGGAAGGU 1 ::::::::: ::::::::::: Target 180 CUCCUCUGC-UGCCCCUUCCA 199							Cupredoxin domain containing protein	Cleavage
			/	Os01g0583700-00	miRNA 21 GAGGAGACGUACGGGGAAGGU 1 ::::::::..: .:::::::: Target 3012 CUCCUCUGUGUCUCCCUUCCA 3032							Similar to predicted protein	Translation
			/	Os08g0561700-01	miRNA 21 GAGGAGACGUACGGGGAAGGU 1 .:::::::: ::::.::::: Target 167 UUCCUCUGCCCGCCCUUUCCA 187							Similar to Superoxide dismutase	Translation
			/	Os07g0160800-00	miRNA 21 GAGGAGACGUACGGGGAAGGU 1 ::. :::::::::::::: Target 153 UCACUUGGCAUGCCCCUUCCA 173							Hypothetical protein	Cleavage
			/	Os07g0693400-00	miRNA 21 GAGGAGACGUACGGGGAAGGU 1 : :.:.:: ::::.::::::: Target 1394 CCCUUUUGAAUGCUCCUUCCA 1414							Importin-beta, N-terminal domain containing protein	Cleavage
			/	Os01g0278900-01	miRNA 21 GAGGAGACGUACGGGGAAGGU 1 :::::: ::::..:::.:: Target 191 GCCCUCUGAAUGCUUCUUUCA 211							Similar to 50S ribosomal protein L40	Cleavage
		2.5	LOC_Os03g59350.1	Os03g0808200	miRNA 21 GAGGAGACGUACGGGGAAGGU 1 :::.::.::::..:::::. Target 1571 GACCUUUGUAUGCUUCUUCCG 1591							cDNA|anthocyanin 3-O-beta-glucosyltransferase, putative, expressed	Cleavage	1
		2.5	LOC_Os10g33104.2	Os10g0469100	miRNA 21 GAGGAGACGUACGGGGAAGGU 1 ..::: ::::.:::::::: Target 668 AGUUUCUUCAUGUCCCUUCCA 688							cDNA|expressed protein	Cleavage	1
		2.5	LOC_Os10g33104.1	Os10g0469100	miRNA 21 GAGGAGACGUACGGGGAAGGU 1 ..::: ::::.:::::::: Target 679 AGUUUCUUCAUGUCCCUUCCA 699							cDNA|expressed protein	Cleavage	1
osa-miR5811	CCTAACCTAGGAGTTCGATGGGAC	2.5	LOC_Os06g46690.1	Os06g0680900	miRNA 24 CAGGGUAGCUUGAGGAUCCAAUCC 1 : :. ::: ::::::::::::.: Target 1 GACUGAUCCAACUCCUAGGUUGGU 24							cDNA|exostosin family protein, putative, expressed	Cleavage	1
			/	Os03g0704901-01	miRNA 24 CAGGGUAGCUUGAGGAUCCAAUCC 1 .::::::::::: ::::::: Target 1011 CCAUCAUCGAACUCCAAGGUUAGC 1034							Non-protein coding transcript.	Translation
miR7767-3p	CCCAAGATGAGTGCTCTCCC	2.5	LOC_Os02g01490.1	Os02g0105100	miRNA 20 CCCUCUCGUGAGUAGAACCC 1 ::::::::.:.::: :::: Target 575 UGGAGAGCAUUUAUCCUGGG 594							cDNA|expressed protein	Cleavage	1
miR9664-3p	ATGCAGTCCTCGATGTCGTAGG	0	LOC_Os05g40150.1	Os05g0479700	miRNA 22 GGAUGCUGUAGCUCCUGACGUA 1 :::::::::::::::::::::: Target 209 CCUACGACAUCGAGGACUGCAU 230							cDNA|RGH2B, putative, expressed. NB-ARC domain containing protein	Cleavage	1
		0	LOC_Os06g06850.1	Os06g0163701	miRNA 22 GGAUGCUGUAGCUCCUGACGUA 1 :::::::::::::::::::::: Target 301 CCUACGACAUCGAGGACUGCAU 322							cDNA|resistance protein LR10, putative, expressed. NB-ARC domain containing protein	Cleavage	1
		0	LOC_Os11g13410.1	Os11g0237600	miRNA 22 GGAUGCUGUAGCUCCUGACGUA 1 :::::::::::::::::::::: Target 253 CCUACGACAUCGAGGACUGCAU 274							cDNA|mla1, putative, expressed. NB-ARC domain containing protein	Cleavage	1
		0	LOC_Os12g13550.1	Os12g0237900	miRNA 22 GGAUGCUGUAGCUCCUGACGUA 1 :::::::::::::::::::::: Target 422 CCUACGACAUCGAGGACUGCAU 443							cDNA|NBS-LRR disease resistance protein, putative, expressed. NB-ARC domain containing protein	Cleavage	1
		0	LOC_Os06g06860.1	Os06g0163900	miRNA 22 GGAUGCUGUAGCUCCUGACGUA 1 :::::::::::::::::::::: Target 276 CCUACGACAUCGAGGACUGCAU 297							cDNA|MLA1, putative, expressed. NB-ARC domain containing protein	Cleavage	1
		0	LOC_Os11g45970.1	Os11g0686900	miRNA 22 GGAUGCUGUAGCUCCUGACGUA 1 :::::::::::::::::::::: Target 251 CCUACGACAUCGAGGACUGCAU 272							cDNA|NBS-LRR disease resistance protein, putative, expressed. NB-ARC domain containing protein	Cleavage	1
		0	LOC_Os11g46080.1	Os11g0687900	miRNA 22 GGAUGCUGUAGCUCCUGACGUA 1 :::::::::::::::::::::: Target 564 CCUACGACAUCGAGGACUGCAU 585							cDNA|NB-ARC domain containing protein, expressed.	Cleavage	1
		0	LOC_Os11g45780.1	/	miRNA 22 GGAUGCUGUAGCUCCUGACGUA 1 :::::::::::::::::::::: Target 200 CCUACGACAUCGAGGACUGCAU 221							cDNA|RGH2B, putative, expressed. NB-ARC domain containing protein	Cleavage	1
		0	LOC_Os11g39260.1	Os11g0605900	miRNA 22 GGAUGCUGUAGCUCCUGACGUA 1 :::::::::::::::::::::: Target 47 CCUACGACAUCGAGGACUGCAU 68							cDNA|NBS-LRR disease resistance protein, putative, expressed. NB-ARC domain containing protein	Cleavage	1
		0	LOC_Os12g28100.1	Os12g0467300	miRNA 22 GGAUGCUGUAGCUCCUGACGUA 1 .::::::::::::::::::::: Target 1200 UCUACGACAUCGAGGACUGCAU 1221							cDNA|NBS-LRR disease resistance protein, putative, expressed. NB-ARC domain containing protein	Cleavage	2
		0.5	LOC_Os11g39320.1	Os11g0606500	miRNA 22 GGAUGCUGUAGCUCCUGACGUA 1 ::::::::::::::::::::.: Target 419 CCUACGACAUCGAGGACUGCGU 440							cDNA|LZ-NBS-LRR class, putative, expressed. NB-ARC domain containing protein	Cleavage	1
		0.5	LOC_Os08g10440.1	Os08g0205150	miRNA 22 GGAUGCUGUAGCUCCUGACGUA 1 ::::.::::::::::::::::: Target 594 CCUAUGACAUCGAGGACUGCAU 615							cDNA|NBS-LRR disease resistance protein, putative, expressed. NB-ARC domain containing protein	Cleavage	1
		0.5	LOC_Os02g17304.1	Os02g0272900	miRNA 22 GGAUGCUGUAGCUCCUGACGUA 1 ::::::::::::::::.::::: Target 392 CCUACGACAUCGAGGAUUGCAU 413							cDNA|resistance protein, putative, expressed. NB-ARC domain containing protein	Cleavage	1
		0.5	LOC_Os08g10430.1	Os08g0205100	miRNA 22 GGAUGCUGUAGCUCCUGACGUA 1 ::::.::::::::::::::::: Target 470 CCUAUGACAUCGAGGACUGCAU 491							cDNA|NBS-LRR disease resistance protein, putative, expressed. NB-ARC domain containing protein	Cleavage	1
		0.5	LOC_Os10g04342.1	Os10g0132700	miRNA 22 GGAUGCUGUAGCUCCUGACGUA 1 ::::.::::::::::::::::: Target 1035 CCUAUGACAUCGAGGACUGCAU 1056							cDNA|stripe rust resistance protein Yr10, putative, expressed. NB-ARC domain containing protein	Cleavage	1
		0.5	LOC_Os10g04110.1	Os10g0131000	miRNA 22 GGAUGCUGUAGCUCCUGACGUA 1 ::::.::::::::::::::::: Target 224 CCUAUGACAUCGAGGACUGCAU 245							cDNA|MLA6 protein, putative, expressed. NB-ARC domain containing protein	Cleavage	1
		0.5	LOC_Os11g15190.1	Os11g0258500	miRNA 22 GGAUGCUGUAGCUCCUGACGUA 1 :::::::.:::::::::::::: Target 218 CCUACGAUAUCGAGGACUGCAU 239							cDNA|RGH1A, putative, expressed. NB-ARC domain containing protein	Cleavage	1
		0.5	LOC_Os11g15500.1	Os11g0261400	miRNA 22 GGAUGCUGUAGCUCCUGACGUA 1 ::::::::::::::::.::::: Target 227 CCUACGACAUCGAGGAUUGCAU 248							cDNA|stripe rust resistance protein Yr10, putative, expressed. NB-ARC domain containing protein	Cleavage	1
		0.5	LOC_Os07g27370.1	/	miRNA 22 GGAUGCUGUAGCUCCUGACGUA 1 ::::::::::::::::.::::: Target 5 CCUACGACAUCGAGGAUUGCAU 26							cDNA|resistance protein, putative, expressed. NB-ARC domain containing protein	Cleavage	1
		0.5	LOC_Os08g31780.1	Os08g0411850	miRNA 22 GGAUGCUGUAGCUCCUGACGUA 1 :.::::::::.::::::::::: Target 227 CUUACGACAUUGAGGACUGCAU 248							cDNA|MLA1, putative, expressed. NB-ARC domain containing protein	Cleavage	1
				Os08g0411900
		0.5	LOC_Os11g11790.1	Os11g0225100	miRNA 22 GGAUGCUGUAGCUCCUGACGUA 1 :: :::.::::::::::::::: Target 521 CCCACGGCAUCGAGGACUGCAU 542							cDNA|NBS-LRR type disease resistance protein, putative, expressed. NB-ARC domain containing protein	Cleavage	1
		0.5	LOC_Os03g46550.1	/	miRNA 22 GGAUGCUGUAGCUCCUGACGUA 1 : ::::::.::::::::::::: Target 312 CGUACGACGUCGAGGACUGCAU 333							cDNA|RGH1A, putative, expressed. NB-ARC domain containing protein	Cleavage	1
		0.5	LOC_Os11g45930.1	Os11g0686500	miRNA 22 GGAUGCUGUAGCUCCUGACGUA 1 :::::::::::::::::.: Target 302 CGCACGACAUCGAGGACUGCGU 323							cDNA|NBS-LRR type disease resistance protein, putative, expressed. NB-ARC domain containing protein	Cleavage	1
		0.5	LOC_Os11g45790.1	Os11g0684700	miRNA 22 GGAUGCUGUAGCUCCUGACGUA 1 :::::::::::::::::.: Target 333 AGCACGACAUCGAGGACUGCGU 354							cDNA|NB-ARC domain containing protein, expressed. NB-ARC domain containing protein	Cleavage	1
		0.5	/	Os11g0629550-00	miRNA 22 GGAUGCUGUAGCUCCUGACGUA 1 :::.::::::::::::::::: Target 766 GCUAUGACAUCGAGGACUGCAU 787							Similar to Disease resistance protein RPM1 homolog.	Cleavage
		1	LOC_Os11g39160.1	Os11g0604900	miRNA 22 GGAUGCUGUAGCUCCUGACGUA 1 :::::::::::::::::::..: Target 224 CCUACGACAUCGAGGACUGUGU 245							cDNA|NBS-LRR disease resistance protein, putative, expressed. NB-ARC domain containing protein	Cleavage	1
		1	LOC_Os11g45750.1	Os11g0684100	miRNA 22 GGAUGCUGUAGCUCCUGACGUA 1 :.::.:::::::::::.::::: Target 804 CUUAUGACAUCGAGGAUUGCAU 825							cDNA|WRKY125, expressed. NB-ARC domain containing protein	Cleavage	1
		1	LOC_Os11g45750.2	Os11g0684100	miRNA 22 GGAUGCUGUAGCUCCUGACGUA 1 :.::.:::::::::::.::::: Target 333 CUUAUGACAUCGAGGAUUGCAU 354							cDNA|WRKY125, expressed. NB-ARC domain containing protein	Cleavage	1
		1	LOC_Os11g11810.1	Os11g0225300	miRNA 22 GGAUGCUGUAGCUCCUGACGUA 1 ::::: :::::::::::::::: Target 241 CCUACCACAUCGAGGACUGCAU 262							cDNA|NBS-LRR disease resistance protein, putative, expressed. NB-ARC domain containing protein	Cleavage	1
		1	LOC_Os11g14380.1	Os11g0249000	miRNA 22 GGAUGCUGUAGCUCCUGACGUA 1 : ::::::::.:::::.::::: Target 359 CAUACGACAUUGAGGAUUGCAU 380							cDNA|resistance protein LR10, putative, expressed. NB-ARC domain containing protein	Cleavage	1
		1	LOC_Os12g28250.1	Os12g0468300	miRNA 22 GGAUGCUGUAGCUCCUGACGUA 1 : ::.:::::.::::::::::: Target 86 CGUAUGACAUUGAGGACUGCAU 107							cDNA|disease resistance protein RPM1, putative, expressed. NB-ARC domain containing protein	Cleavage	1
		1.5	LOC_Os12g28100.1	Os12g0467300	miRNA 22 GGAUGCUGUAGCUCCUGACGUA 1 :::::::.::.::::::::.:: Target 3990 CCUACGAUAUUGAGGACUGUAU 4011							cDNA|NBS-LRR disease resistance protein, putative, expressed. NB-ARC domain containing protein	Cleavage	2
		1.5	LOC_Os10g22484.2	Os10g0370100	miRNA 22 GGAUGCUGUAGCUCCUGACGUA 1 :::::::::::::::::: ::: Target 432 CCUACGACAUCGAGGACUACAU 453							cDNA|RGH2B, putative, expressed. NB-ARC domain containing protein	Cleavage	1
		1.5	LOC_Os10g22484.1	Os10g0370100	miRNA 22 GGAUGCUGUAGCUCCUGACGUA 1 :::::::::::::::::: ::: Target 432 CCUACGACAUCGAGGACUACAU 453							cDNA|RGH2B, putative, expressed. NB-ARC domain containing protein	Cleavage	1
		1.5	LOC_Os11g46210.1	Os11g0689100	miRNA 22 GGAUGCUGUAGCUCCUGACGUA 1 ::::.:::.:.::::::::::: Target 621 CCUAUGACGUUGAGGACUGCAU 642							cDNA|NB-ARC domain containing protein, expressed. NB-ARC domain containing protein	Cleavage	1
		1.5	LOC_Os11g27430.1	Os11g0462500	miRNA 22 GGAUGCUGUAGCUCCUGACGUA 1 :::::::::: ::::::::::: Target 224 CCUACGACAUGGAGGACUGCAU 245							cDNA|NB-ARC domain containing protein, expressed. NB-ARC domain containing protein	Cleavage	1
		1.5	LOC_Os10g22484.3	Os10g0370100	miRNA 22 GGAUGCUGUAGCUCCUGACGUA 1 :::::::::::::::::: ::: Target 336 CCUACGACAUCGAGGACUACAU 357							cDNA|RGH2B, putative, expressed. NB-ARC domain containing protein	Cleavage	1
		1.5	LOC_Os01g23380.1	Os01g0335700	miRNA 22 GGAUGCUGUAGCUCCUGACGUA 1 ::::::::::::::::::: :: Target 380 CCUACGACAUCGAGGACUGGAU 401							cDNA|stripe rust resistance protein Yr10, putative, expressed. NB-ARC domain containing protein	Cleavage	1
		1.5	LOC_Os08g07774.1	Os08g0174800	miRNA 22 GGAUGCUGUAGCUCCUGACGUA 1 :.::.::.:::::::::::.:: Target 331 CUUAUGAUAUCGAGGACUGUAU 352							cDNA|disease resistance protein RPM1, putative, expressed. NB-ARC domain containing protein	Cleavage	1
		1.5	LOC_Os12g37770.1	Os12g0565200	miRNA 22 GGAUGCUGUAGCUCCUGACGUA 1 :.::.:::::::::::.::.:: Target 386 CUUAUGACAUCGAGGAUUGUAU 407							cDNA|RGH1A, putative, expressed. NB-ARC domain containing protein	Cleavage	1
		1.5	LOC_Os12g17490.1	Os12g0273300	miRNA 22 GGAUGCUGUAGCUCCUGACGUA 1 :::.::.::::::::.::::: Target 230 GCUAUGAUAUCGAGGAUUGCAU 251							cDNA|stripe rust resistance protein Yr10, putative, expressed. NB-ARC domain containing protein	Cleavage	1
		1.5	LOC_Os12g37760.1	Os12g0565100	miRNA 22 GGAUGCUGUAGCUCCUGACGUA 1 .::.:::::.::::::::.:: Target 615 AUUAUGACAUUGAGGACUGUAU 636							cDNA|RGH1A, putative, expressed. NB-ARC domain containing protein	Cleavage	1
		1.5	LOC_Os11g11550.1	Os11g0222900	miRNA 22 GGAUGCUGUAGCUCCUGACGUA 1 ::::::::::::::::: : Target 394 CGCACGACAUCGAGGACUGCCU 415							cDNA|NBS-LRR disease resistance protein, putative, expressed. NB-ARC domain containing protein	Cleavage	1
		1.5	LOC_Os11g11550.2	Os11g0222900	miRNA 22 GGAUGCUGUAGCUCCUGACGUA 1 ::::::::::::::::: : Target 394 CGCACGACAUCGAGGACUGCCU 415							cDNA|NBS-LRR disease resistance protein, putative, expressed. NB-ARC domain containing protein	Cleavage	1
		1.5	LOC_Os08g30660.1	/	miRNA 22 GGAUGCUGUAGCUCCUGACGUA 1 ::::::: ::::::::::: Target 221 CGCACGACAUGGAGGACUGCAU 242							cDNA|NB-ARC domain containing protein, expressed	Cleavage	1
		2	LOC_Os11g45924	Os11g0686400-00	miRNA 22 GGAUGCUGUAGCUCCUGACGUA 1 :.::::::::::::::: :.:: Target 212 CUUACGACAUCGAGGACAGUAU 233							Similar to WRKY transcription factor 41. NB-ARC domain containing protein	Cleavage
		2	LOC_Os08g42710.1	Os08g0539900	miRNA 22 GGAUGCUGUAGCUCCUGACGUA 1 ::::::::.::::::::::: : Target 227 CCUACGACGUCGAGGACUGCCU 248							cDNA|NB-ARC domain containing protein, expressed	Cleavage	1
		2	LOC_Os09g34150.2	Os09g0517100	miRNA 22 GGAUGCUGUAGCUCCUGACGUA 1 ::::::::.::::::::::: : Target 251 CCUACGACGUCGAGGACUGCCU 272							cDNA|NBS-LRR disease resistance protein, putative, expressed	Cleavage	1
		2	LOC_Os08g07940.1	/	miRNA 22 GGAUGCUGUAGCUCCUGACGUA 1 :::::::::: :::::.::::: Target 233 CCUACGACAUGGAGGAUUGCAU 254							cDNA|disease resistance protein RPM1, putative, expressed. NB-ARC domain containing protein	Cleavage	1
		2	LOC_Os06g06390.1	Os06g0158400	miRNA 22 GGAUGCUGUAGCUCCUGACGUA 1 ::::::::. :::::::::::: Target 258 CCUACGACGCCGAGGACUGCAU 279							cDNA|NBS-LRR type disease resistance protein, putative, expressed	Cleavage	1
		2	LOC_Os09g34150.1	Os09g0517100	miRNA 22 GGAUGCUGUAGCUCCUGACGUA 1 ::::::::.::::::::::: : Target 251 CCUACGACGUCGAGGACUGCCU 272							cDNA|NBS-LRR disease resistance protein, putative, expressed	Cleavage	1
		2	LOC_Os12g09710.1	Os12g0198900	miRNA 22 GGAUGCUGUAGCUCCUGACGUA 1 ::::.::::::::::::::: : Target 257 CCUAUGACAUCGAGGACUGCCU 278							cDNA|NBS-LRR disease resistance protein, putative, expressed	Cleavage	1
		2	LOC_Os02g19750.1	Os02g0300500	miRNA 22 GGAUGCUGUAGCUCCUGACGUA 1 ::::::::. :::::::::::: Target 188 CCUACGACGCCGAGGACUGCAU 209							cDNA|NBS-LRR type disease resistance protein, putative, expressed	Cleavage	1
		2	LOC_Os12g37290.1	Os12g0559400	miRNA 22 GGAUGCUGUAGCUCCUGACGUA 1 ::::::::.::::::::::: : Target 227 CCUACGACGUCGAGGACUGCCU 248							cDNA|resistance protein T10rga2-1A, putative, expressed. NB-ARC domain containing protein	Cleavage	1
		2	LOC_Os07g09940.1	Os07g0197500	miRNA 22 GGAUGCUGUAGCUCCUGACGUA 1 ::::::::. :::::::::::: Target 233 CCUACGACGCCGAGGACUGCAU 254							cDNA|NBS-LRR resistance protein, putative, expressed. NB-ARC domain containing protein	Cleavage	1
		2	LOC_Os07g09910.1	Os07g0197300	miRNA 22 GGAUGCUGUAGCUCCUGACGUA 1 ::::::::. :::::::::::: Target 221 CCUACGACGCCGAGGACUGCAU 242							cDNA|stripe rust resistance protein Yr10, putative, expressed. NB-ARC domain containing protein	Cleavage	1
		2	LOC_Os11g29030.1	Os11g0480000	miRNA 22 GGAUGCUGUAGCUCCUGACGUA 1 :::::::::: :::::::::.: Target 233 CCUACGACAUGGAGGACUGCGU 254							cDNA|disease resistance protein RPM1, putative, expressed. NB-ARC domain containing protein	Cleavage	1
		2	LOC_Os12g17090.2	Os12g0270300	miRNA 22 GGAUGCUGUAGCUCCUGACGUA 1 :.::.::.::.:::::.::::: Target 566 CUUAUGAUAUUGAGGAUUGCAU 587							cDNA|stripe rust resistance protein Yr10, putative, expressed. NB-ARC domain containing protein	Cleavage	1
		2	LOC_Os12g17090.1	Os12g0270300	miRNA 22 GGAUGCUGUAGCUCCUGACGUA 1 :.::.::.::.:::::.::::: Target 456 CUUAUGAUAUUGAGGAUUGCAU 477							cDNA|stripe rust resistance protein Yr10, putative, expressed. NB-ARC domain containing protein	Cleavage	1
		2	LOC_Os12g17140.1	Os12g0270600	miRNA 22 GGAUGCUGUAGCUCCUGACGUA 1 :.::.::.::.:::::.::::: Target 230 CUUAUGAUAUUGAGGAUUGCAU 251							cDNA|mla1, putative, expressed	Cleavage	1
		2	LOC_Os08g01560.1	/	miRNA 22 GGAUGCUGUAGCUCCUGACGUA 1 .:: :::.::.::::::::::: Target 172 UCUCCGAUAUUGAGGACUGCAU 193							cDNA|expressed protein. Coiled-coil domain containing.	Cleavage	1
		2	LOC_Os07g40810.1	Os07g0599100	miRNA 22 GGAUGCUGUAGCUCCUGACGUA 1 : ::.::.::::::::.::.:: Target 227 CAUAUGAUAUCGAGGAUUGUAU 248							cDNA|NBS-LRR type disease resistance protein, putative, expressed	Cleavage	1
		2	LOC_Os08g28600.1	Os08g0373400	miRNA 22 GGAUGCUGUAGCUCCUGACGUA 1 :::::::::: ::::::.: Target 209 CACACGACAUCGAAGACUGCGU 230							cDNA|resistance protein, putative, expressed. NB-ARC domain containing ptotein	Cleavage	1
		2	LOC_Os07g07530.1	Os07g0170900	miRNA 22 GGAUGCUGUAGCUCCUGACGUA 1 :::.:::::::::: :::: Target 488 UUGACGGCAUCGAGGACGGCAU 509							cDNA|expressed protein	Cleavage	1
		2.5	LOC_Os08g42670.2	Os08g0539400	miRNA 22 GGAUGCUGUAGCUCCUGACGUA 1 :::::::..::::::::::: : Target 334 CCUACGAUGUCGAGGACUGCCU 355							cDNA|resistance protein, putative, expressed. NB-ARC domain containing ptotein	Cleavage	1
		2.5	LOC_Os08g42670.1	Os08g0539400	miRNA 22 GGAUGCUGUAGCUCCUGACGUA 1 :::::::..::::::::::: : Target 339 CCUACGAUGUCGAGGACUGCCU 360							cDNA|resistance protein, putative, expressed. NB-ARC domain containing ptotein	Cleavage	1
		2.5	LOC_Os10g22510.1	Os10g0370400	miRNA 22 GGAUGCUGUAGCUCCUGACGUA 1 :::.:::::: :::::::::.: Target 343 CCUGCGACAUGGAGGACUGCGU 364							cDNA|MLA1, putative, expressed. NB-ARC domain containing ptotein	Cleavage	1
		2.5	LOC_Os12g06920.1	Os12g0166600	miRNA 22 GGAUGCUGUAGCUCCUGACGUA 1 ::::::::. ::::::::::.: Target 209 CCUACGACGCCGAGGACUGCGU 230							cDNA|NBS-LRR disease resistance protein, putative, expressed	Cleavage	1
		2.5	LOC_Os07g12680.1	/	miRNA 22 GGAUGCUGUAGCUCCUGACGUA 1 ::::::::::::::::.: .:: Target 140 CCUACGACAUCGAGGAUUCUAU 161							cDNA|LZ-NBS-LRR class RGA, putative, expressed	Cleavage	1
		2.5	LOC_Os11g11920.1	Os11g0226400	miRNA 22 GGAUGCUGUAGCUCCUGACGUA 1 :.::.:::::.::::::: ::: Target 233 CUUAUGACAUUGAGGACUACAU 254							cDNA|resistance protein, putative, expressed. NB-ARC domain containing protein	Cleavage	1
		2.5	LOC_Os11g34970.1	/	miRNA 22 GGAUGCUGUAGCUCCUGACGUA 1 ::::: ::::::::::: :::: Target 177 CCUACAACAUCGAGGACAGCAU 198							cDNA|NB-ARC domain containing protein, expressed	Cleavage	1
		2.5	LOC_Os04g12830.1	/	miRNA 22 GGAUGCUGUAGCUCCUGACGUA 1 :.::.:::. :::::::::::: Target 227 CUUAUGACGCCGAGGACUGCAU 248							cDNA|expressed protein. NB-ARC domain containing protein	Cleavage	1
		2.5	LOC_Os04g45420.1	/	miRNA 22 GGAUGCUGUAGCUCCUGACGUA 1 ::::: :::.:::::.:::.: Target 3281 GCUACGCCAUUGAGGAUUGCGU 3302							cDNA|retrotransposon protein, putative, unclassified, expressed	Cleavage	1
		2.5	LOC_Os11g16530.1	Os11g0266500	miRNA 22 GGAUGCUGUAGCUCCUGACGUA 1 : ::.:::::.::::::: ::: Target 390 CAUAUGACAUUGAGGACUCCAU 411							cDNA|mal, putative, expressed. NB-ARC domain containing protein	Cleavage	1
		2.5	LOC_Os11g16530.2	Os11g0266500	miRNA 22 GGAUGCUGUAGCUCCUGACGUA 1 : ::.:::::.::::::: ::: Target 611 CAUAUGACAUUGAGGACUCCAU 632							cDNA|mal, putative, expressed. NB-ARC domain containing protein	Cleavage	1
		2.5	LOC_Os11g34880.1	Os11g0550100	miRNA 22 GGAUGCUGUAGCUCCUGACGUA 1 : ::.:::::::::::: ::.: Target 443 CGUAUGACAUCGAGGACAGCGU 464							cDNA|NB-ARC domain containing protein, expressed	Cleavage	1
		2.5	LOC_Os04g11760.1	Os04g0193950	miRNA 22 GGAUGCUGUAGCUCCUGACGUA 1 : ::.::.:::::::::: ::: Target 227 CGUAUGAUAUCGAGGACUACAU 248							cDNA|disease resistance protein, putative, expressed	Cleavage	1
		2.5	LOC_Os11g11940.1	Os11g0226700	miRNA 22 GGAUGCUGUAGCUCCUGACGUA 1 :. .:::::: :::::::::.: Target 303 CUCGCGACAUAGAGGACUGCGU 324							cDNA|MLA10, putative, expressed. NB-ARC domain containing protein	Cleavage	1
		2.5	LOC_Os03g19690.1	Os03g0310500	miRNA 22 GGAUGCUGUAGCUCCUGACGUA 1 .: :::::.:::::::: ::.: Target 231 UCCACGACGUCGAGGACAGCGU 252							cDNA|expressed protein	Cleavage	1
		2.5	LOC_Os03g19690.2	Os03g0310500	miRNA 22 GGAUGCUGUAGCUCCUGACGUA 1 .: :::::.:::::::: ::.: Target 131 UCCACGACGUCGAGGACAGCGU 152							cDNA|expressed protein	Cleavage	1
		2.5	LOC_Os08g07920.1	/	miRNA 22 GGAUGCUGUAGCUCCUGACGUA 1 : : ::::::::: :::::::: Target 230 CAUUCGACAUCGACGACUGCAU 251							cDNA|disease resistance protein RPM1, putative, expressed. NB-ARC domain containing protein	Cleavage	1
		2.5	LOC_Os11g45980.1	/	miRNA 22 GGAUGCUGUAGCUCCUGACGUA 1 :.::::::::::::: :.: Target 230 CGCAUGACAUCGAGGACUACGU 251							cDNA|NBS-LRR type disease resistance protein, putative, expressed	Cleavage	1
		2.5	LOC_Os05g40160.1	Os05g0479800	miRNA 22 GGAUGCUGUAGCUCCUGACGUA 1 :::::.::::::: :::.: Target 239 CGCACGACGUCGAGGAGUGCGU 260							cDNA|NB-ARC domain containing protein, expressed	Cleavage	1
		2.5	LOC_Os03g59050.1	Os03g0805200	miRNA 22 GGAUGCUGUAGCUCCUGACGUA 1 :: : :. :::::::::::::: Target 953 CCAAGGGGAUCGAGGACUGCAU 974							cDNA|DEAD-box ATP-dependent RNA helicase, putative, expressed	Cleavage	1
		2.5	LOC_Os06g38090.1	/	miRNA 22 GGAUGCUGUAGCUCCUGACGUA 1 :::::. .::::::::::: Target 941 AUGACGACGAUGAGGACUGCAU 962							cDNA|transposon protein, putative, unclassified, expressed	Cleavage	1
		2.5	/	Os06g0130100-02	miRNA 22 GGAUGCUGUAGCUCCUGACGUA 1 :.:: ::.:.::::::::: Target 403 CAGAUGAGAUUGGGGACUGCAU 424							Oryza sativa stress-induced protein kinase gene 1., Drought and salt stress tolerance., Receptor-like kinase (RLK)	Cleavage	1
		2.5	/	Os06g0130100-01	miRNA 22 GGAUGCUGUAGCUCCUGACGUA 1 :.:: ::.:.::::::::: Target 347 CAGAUGAGAUUGGGGACUGCAU 368							Receptor-like kinase (RLK), Drought and salt stress tolerance	Cleavage	1
		3	/	Os02g0180000-01	miRNA 22 GGAUGCUGUAGCUCCUGACGUA 1 :::.:::. .::::::::: Target 1146 GUGACGGCAUUUGGGACUGCAU 1167							Similar to Protein phosphatase type-2C	Translation	1
		3	/	Os06g0651600-01	miRNA 22 GGAUGCUGUAGCUCCUGACGUA 1 :.:.:::: .::::::::: Target 1101 GUGAUGGCAUCUGGGACUGCAU 1122							Similar to Protein phosphatase type-2C	Translation	1
		3	/	Os04g0207501-01	miRNA 22 GGAUGCUGUAGCUCCUGACGUA 1 :::::::::::.::.:: Target 2555 UUCUGGACAUCGAGGAUUGUAU 2576							Hypothetical gene.	Cleavage	1
		3	/	Os11g0611100-00	miRNA 22 GGAUGCUGUAGCUCCUGACGUA 1 ::::::::::::.:: :: Target 316 CGGACGACAUCGAGGGCUUCAA 337							Hypothetical conserved gene	Cleavage	1
		3	/	Os02g0138000-00	miRNA 22 GGAUGCUGUAGCUCCUGACGUA 1 .: ::::: ::::::.:: ::: Target 749 UCAACGACUUCGAGGGCUCCAU 770							Leucine-rich repeat, plant specific containing protein.	Cleavage	1
		3	LOC_Os06g06400.1	Os06g0158500	miRNA 22 GGAUGCUGUAGCUCCUGACGUA 1 ::::.::.. :::::::::::: Target 1938 CCUAUGAUGCCGAGGACUGCAU 1959							cDNA|NBS-LRR type disease resistance protein, putative, expressed.	Cleavage	1
		3	LOC_Os11g32170.1	Os11g0524400	miRNA 22 GGAUGCUGUAGCUCCUGACGUA 1 ::::::::::::::::: ::: Target 242 CCUACGACAUCGAGGACGCCAU 263							cDNA|stripe rust resistance protein Yr10, putative, expressed. NB-ARC domain containing protein	Cleavage	1
				Os11g0524601
		3	LOC_Os11g16470.3	Os11g0265900	miRNA 22 GGAUGCUGUAGCUCCUGACGUA 1 ::::::::::::::::: ::: Target 1276 CCUACGACAUCGAGGACACCAU 1297							cDNA|MLA10, putative, expressed. NB-ARC domain containing protein	Cleavage	1
		3	LOC_Os11g16470.1	Os11g0265900	miRNA 22 GGAUGCUGUAGCUCCUGACGUA 1 ::::::::::::::::: ::: Target 1166 CCUACGACAUCGAGGACACCAU 1187							cDNA|MLA10, putative, expressed. NB-ARC domain containing protein	Cleavage	1
		3	LOC_Os11g34920.1	Os11g0550500	miRNA 22 GGAUGCUGUAGCUCCUGACGUA 1 ::::::::::::::::: ::: Target 579 CCUACGACAUCGAGGACACCAU 600							cDNA|stripe rust resistance protein Yr10, putative, expressed. NB-ARC domain containing protein	Cleavage	1
		3	LOC_Os11g16470.2	Os11g0265900	miRNA 22 GGAUGCUGUAGCUCCUGACGUA 1 ::::::::::::::::: ::: Target 330 CCUACGACAUCGAGGACACCAU 351							cDNA|MLA10, putative, expressed. NB-ARC domain containing protein	Cleavage	1
		3	LOC_Os12g09240.1	/	miRNA 22 GGAUGCUGUAGCUCCUGACGUA 1 ::::.:::::.:: ::.::::: Target 218 CCUAUGACAUUGAAGAUUGCAU 239							cDNA|NBS-LRR disease resistance protein, putative, expressed	Cleavage	1
		3	LOC_Os08g28470.1	/	miRNA 22 GGAUGCUGUAGCUCCUGACGUA 1 ::::::::::::::::: :: : Target 899 CCUACGACAUCGAGGACAGCCU 920							cDNA|disease resistance protein RPM1, putative, expressed. NB-ARC domain containing protein	Cleavage	1
		3	LOC_Os11g16510.1	/	miRNA 22 GGAUGCUGUAGCUCCUGACGUA 1 ::::::::::::::::: ::: Target 329 CCUACGACAUCGAGGACACCAU 350							cDNA|disease resistance protein RPM1, putative, expressed	Cleavage	1
		3	LOC_Os08g29809.1	Os08g0387700	miRNA 22 GGAUGCUGUAGCUCCUGACGUA 1 ::::::: .:::::::: :::: Target 312 CCUACGAAGUCGAGGACGGCAU 333							cDNA|resistance protein LR10, putative, expressed. NB-ARC domain containing protein	Cleavage	1
		3	LOC_Os03g30910.1	Os03g0422900	miRNA 22 GGAUGCUGUAGCUCCUGACGUA 1 :.::.:::. .::::::::::: Target 227 CUUAUGACGCUGAGGACUGCAU 248							cDNA|disease resistance protein RPM1, putative, expressed. NB-ARC domain containing protein	Cleavage	1
		3	LOC_Os06g37840.1	/	miRNA 22 GGAUGCUGUAGCUCCUGACGUA 1 ::::.::. :.::::::::.:: Target 227 CCUAUGAUCUUGAGGACUGUAU 248							cDNA|resistance protein, putative, expressed. NB-ARC domain containing protein	Cleavage	1
		3	LOC_Os12g17480.1	/	miRNA 22 GGAUGCUGUAGCUCCUGACGUA 1 :::.::.::.:: :::::::: Target 230 GCUAUGAUAUUGAAGACUGCAU 251							cDNA|MLA12, putative, expressed. NB-ARC domain containing protein	Cleavage	1
		3	LOC_Os12g17410.1	Os12g0272800	miRNA 22 GGAUGCUGUAGCUCCUGACGUA 1 :::.::.::.:: :::::::: Target 230 GCUAUGAUAUUGAAGACUGCAU 251							cDNA|NB-ARC domain containing protein, expressed	Cleavage	1
		3	LOC_Os05g05220.1	Os05g0144200	miRNA 22 GGAUGCUGUAGCUCCUGACGUA 1 :: ::::::::::::::: : : Target 156 CCGACGACAUCGAGGACUUCUU 177							cDNA|glioma tumor suppressor candidate region gene 2 protein, putative, expressed	Cleavage	1
		3	LOC_Os11g07225.1	Os11g0173432	miRNA 22 GGAUGCUGUAGCUCCUGACGUA 1 .: :::.::::::::.. :::: Target 599 UCAACGGCAUCGAGGGUGGCAU 620							cDNA|expressed protein	Cleavage	1
		3	LOC_Os03g57640.1	Os03g0790500	miRNA 22 GGAUGCUGUAGCUCCUGACGUA 1 : :::: :.:::::::::::. Target 124 CGUACGUCGUCGAGGACUGCGG 145							cDNA|gibberellin receptor GID1L2, putative, expressed	Cleavage	1
		3	LOC_Os02g45160.1	Os02g0673100	miRNA 22 GGAUGCUGUAGCUCCUGACGUA 1 :: .:: :.::::::.::::.: Target 1047 CCGGCGCCGUCGAGGGCUGCGU 1068							cDNA|aluminum-activated malate transporter, putative, expressed	Cleavage	1
		3	LOC_Os03g57630.1	/	miRNA 22 GGAUGCUGUAGCUCCUGACGUA 1 : :::: :.:::::::::::. Target 29 CGUACGUCGUCGAGGACUGCGG 50							cDNA|hypothetical protein	Cleavage	1
		3	LOC_Os05g05440.1	Os05g0147100	miRNA 22 GGAUGCUGUAGCUCCUGACGUA 1 :. .::: ::::.:::::::: Target 1415 CUGGCGAAAUCGGGGACUGCAA 1436							cDNA|expressed protein	Cleavage	1
				Os05g0147133
		3	LOC_Os10g18150.1	Os10g0328700	miRNA 22 GGAUGCUGUAGCUCCUGACGUA 1 : :.:.:.:::::::: :::: Target 1148 GCCAUGGCGUCGAGGACAGCAU 1169							cDNA|crooked neck, putative, expressed	Cleavage	1
		3	LOC_Os12g18374.2	Os12g0281600	miRNA 22 GGAUGCUGUAGCUCCUGACGUA 1 ::::::: ::::::: ::: Target 267 CGCACGACAUGGAGGACUCCAU 288							cDNA|NB-ARC domain containing protein, expressed	Cleavage	1
		3.5	LOC_Os11g11580.1	Os11g0223201	miRNA 22 GGAUGCUGUAGCUCCUGACGUA 1 ::::.::::: ::::::::: : Target 221 CCUAUGACAUGGAGGACUGCCU 242							cDNA|NB-ARC domain containing protein, expressed	Cleavage	1
				Os11g0223400
		3.5	LOC_Os08g31800.1	Os08g0412100	miRNA 22 GGAUGCUGUAGCUCCUGACGUA 1 ::::.::..: :::::.::::: Target 780 CCUAUGAUGUAGAGGAUUGCAU 801							cDNA|RGH1A, putative, expressed. NB-ARC domain containing protein	Cleavage	1
		3.5	LOC_Os09g34160.1	Os09g0517200	miRNA 22 GGAUGCUGUAGCUCCUGACGUA 1 ::::::::.::::::::: : : Target 227 CCUACGACGUCGAGGACUCCCU 248							cDNA|resistance protein, putative, expressed. NB-ARC domain containing protein	Cleavage	1
		3.5	LOC_Os08g01580.1	/	miRNA 22 GGAUGCUGUAGCUCCUGACGUA 1 ::::.::::: :: :::::::: Target 215 CCUAUGACAUGGAAGACUGCAU 236							cDNA|NBS-LRR disease resistance protein, putative, expressed	Cleavage	1
		3.5	LOC_Os11g37850.1	Os11g0590400	miRNA 22 GGAUGCUGUAGCUCCUGACGUA 1 ::::::::::.:::::: ::: Target 218 CCUACGACAUUGAGGACAACAU 239							cDNA|stripe rust resistance protein Yr10, putative, expressed. NB-ARC domain containing protein	Cleavage	1
		3.5	LOC_Os11g13510.1	Os11g0238700	miRNA 22 GGAUGCUGUAGCUCCUGACGUA 1 :::::::::: :::::. :::: Target 239 CCUACGACAUGGAGGAUAGCAU 260							cDNA|stripe rust resistance protein Yr10, putative, expressed. NB-ARC domain containing protein	Cleavage	1
		3.5	LOC_Os07g39810.1	Os07g0586800	miRNA 22 GGAUGCUGUAGCUCCUGACGUA 1 :::::::::::::::.: ::: Target 37 CCUACGACAUCGAGGGCGUCAU 58							cDNA|lipase class 3 family protein, putative, expressed	Cleavage	1
		3.5	LOC_Os12g33160.1	Os12g0516300	miRNA 22 GGAUGCUGUAGCUCCUGACGUA 1 :.::::::::::::::. ::: Target 484 CUUACGACAUCGAGGAUGCCAU 505							cDNA|RGH1A, putative, expressed. NB-ARC domain containing protein	Cleavage	1
		3.5	LOC_Os12g36720.1	Os12g0553200	miRNA 22 GGAUGCUGUAGCUCCUGACGUA 1 :.::::::::::::::. ::: Target 473 CUUACGACAUCGAGGAUGCCAU 494							cDNA|RGH1A, putative, expressed. NB-ARC domain containing protein	Cleavage	1
		3.5	LOC_Os12g36730.1	Os12g0553600	miRNA 22 GGAUGCUGUAGCUCCUGACGUA 1 :.::::::::::::::. ::: Target 488 CUUACGACAUCGAGGAUGCCAU 509							cDNA|stripe rust resistance protein Yr10, putative, expressed. NB-ARC domain containing protein	Cleavage	1
		3.5	LOC_Os03g21890.1	Os03g0337500	miRNA 22 GGAUGCUGUAGCUCCUGACGUA 1 :::::::::: ::::: ::.: Target 1976 GCUACGACAUCCAGGACAGCGU 1997							cDNA|potassium transporter, putative, expressed	Cleavage	1
		3.5	LOC_Os06g23070.1	/	miRNA 22 GGAUGCUGUAGCUCCUGACGUA 1 .:: ::.:::::: ::::::.: Target 11 UCUCCGGCAUCGACGACUGCGU 32							cDNA|retrotransposon protein, putative, Ty3-gypsy subclass, expressed	Cleavage	1
		3.5	LOC_Os10g17690.1	Os10g0324100	miRNA 22 GGAUGCUGUAGCUCCUGACGUA 1 :.::.:: ::.:::::::: :: Target 5 CUUAUGAGAUUGAGGACUGGAU 26							cDNA|NB-ARC domain containing protein, expressed. NB-ARC domain containing protein	Cleavage	1
		3.5	LOC_Os09g39760.1	Os09g0571100	miRNA 22 GGAUGCUGUAGCUCCUGACGUA 1 ::.: :::::::::.:: ::: Target 791 GCUGCUACAUCGAGGGCUCCAU 812							cDNA|pectinesterase, putative, expressed	Cleavage	1
		3.5	LOC_Os04g46740.2	Os04g0553500	miRNA 22 GGAUGCUGUAGCUCCUGACGUA 1 ::.: :::::::::.:: ::: Target 1204 ACUGCUACAUCGAGGGCUCCAU 1225							cDNA|pectinesterase, putative, expressed	Cleavage	1
				Os04g0553650
		3.5	LOC_Os01g41310.1	Os01g0596300	miRNA 22 GGAUGCUGUAGCUCCUGACGUA 1 : :::::::: ::::::: Target 373 UCGUCCACAUCGAGCACUGCAU 394							cDNA|OsFBX18 - F-box domain containing protein, expressed	Cleavage	2
		3.5	LOC_Os04g46740.1	Os04g0553500	miRNA 22 GGAUGCUGUAGCUCCUGACGUA 1 ::.: :::::::::.:: ::: Target 761 ACUGCUACAUCGAGGGCUCCAU 782							cDNA|pectinesterase, putative, expressed	Cleavage	1
				Os04g0553650
		3.5	LOC_Os01g16400.1	Os01g0269800	miRNA 22 GGAUGCUGUAGCUCCUGACGUA 1 : ::::::. ::::::::::: Target 233 CGUACGACGCGGAGGACUGCAU 254							cDNA|NB-ARC domain containing protein, expressed	Cleavage	1
		3.5	LOC_Os01g16390.1	Os01g0269700	miRNA 22 GGAUGCUGUAGCUCCUGACGUA 1 : ::::::. ::::::::::: Target 233 CGUACGACGCGGAGGACUGCAU 254							cDNA|NB-ARC domain containing protein, expressed	Cleavage	1
		3.5	LOC_Os08g10260.1	Os08g0202400	miRNA 22 GGAUGCUGUAGCUCCUGACGUA 1 : ::.::.::.:: ::.::::: Target 227 CAUAUGAUAUUGAAGAUUGCAU 248							cDNA|NBS-LRR disease resistance protein, putative, expressed	Cleavage	1
		3.5	LOC_Os03g06139.1	Os03g0157400	miRNA 22 GGAUGCUGUAGCUCCUGACGUA 1 :: .::::.:::: :.::::.: Target 922 CCGGCGACGUCGAAGGCUGCGU 943							cDNA|ABC-2 type transporter domain containing protein, expressed	Cleavage	1
		3.5	LOC_Os01g61060.1	Os01g0825900	miRNA 22 GGAUGCUGUAGCUCCUGACGUA 1 ::::::.:::::::: ::. Target 1767 UGUACGACGUCGAGGACGGCGG 1788							cDNA|SAG20, putative, expressed	Cleavage	2
		3.5	LOC_Os10g02380.1	Os10g0113000	miRNA 22 GGAUGCUGUAGCUCCUGACGUA 1 ..:::: :: :::::.::::.: Target 211 UUUACGCCACCGAGGGCUGCGU 232							cDNA|oxidoreductase, aldo/keto reductase family protein, putative, expressed	Cleavage	1
				Os10g0113100
		3.5	LOC_Os03g19200.1	Os03g0304500	miRNA 22 GGAUGCUGUAGCUCCUGACGUA 1 :: ::: ::::: :::::::: Target 1372 CCGACGCCAUCGCGGACUGCAA 1393							cDNA|DNAJ heat shock N-terminal domain-containing protein, putative, expressed	Translation	1
		3.5	LOC_Os05g34330.1	Os05g0415900	miRNA 22 GGAUGCUGUAGCUCCUGACGUA 1 .: .:::.:::::::.: ::.: Target 599 UCCGCGAUAUCGAGGGCGGCGU 620							cDNA|retrotransposon protein, putative, unclassified, expressed	Cleavage	1
		4	LOC_Os11g27440.1	Os11g0462900	miRNA 22 GGAUGCUGUAGCUCCUGACGUA 1 ::::.::.::::::::.: :: Target 3137 CCUAUGAUAUCGAGGAUUACAC 3158							cDNA|MLA7, putative, expressed. NB-ARC domain caontaining protein	Cleavage	1
		4	LOC_Os11g19160.1	Os11g0297300	miRNA 22 GGAUGCUGUAGCUCCUGACGUA 1 :::::::::::::::: :: : Target 878 CCUACGACAUCGAGGAGUGGAA 899							cDNA|beta-D-xylosidase, putative, expressed	Cleavage	1
		4	LOC_Os11g37774.1	Os11g0589100	miRNA 22 GGAUGCUGUAGCUCCUGACGUA 1 ::::.:::::.:::::: ::: Target 296 CCUAUGACAUUGAGGACAACAU 317							cDNA|stripe rust resistance protein Yr10, putative, expressed. NB-ARC domain caontaining protein	Cleavage	1
		4	LOC_Os11g13430.1	Os11g0237900	miRNA 22 GGAUGCUGUAGCUCCUGACGUA 1 ::::.::::: :::::. :::: Target 239 CCUAUGACAUGGAGGAUAGCAU 260							cDNA|RGH1A, putative, expressed. NB-ARC domain caontaining protein	Cleavage	1
		4	LOC_Os11g37780.1	Os11g0589200	miRNA 22 GGAUGCUGUAGCUCCUGACGUA 1 :::::::.::.:::::: ::: Target 218 CCUACGAUAUUGAGGACACCAU 239							cDNA|stripe rust resistance protein Yr10, putative, expressed. NB-ARC domain caontaining protein	Cleavage	1
				Os11g0589401
		4		Os06g0158300-01	miRNA 22 GGAUGCUGUAGCUCCUGACGUA 1 :::::::: .:::::.::.:: Target 980 CCUACGACUCUGAGGAUUGUAU 1001							NB-ARC domain containing protein	Cleavage	1
		4		Os07g0607400-01	miRNA 22 GGAUGCUGUAGCUCCUGACGUA 1 ::.::::::: :::.:: ::: Target 747 ACUGCGACAUCCAGGGCUCCAU 768							Pectin lyase fold/virulence factor domain containing protein	Translation	1
		4		Os01g0948900-01	miRNA 22 GGAUGCUGUAGCUCCUGACGUA 1 ::::: :.::::: :::::: Target 1431 ACUACGCCGUCGAGAACUGCAG 1452							Ankyrin repeat containing protein	Cleavage	1
		4		Os01g0948900-02	miRNA 22 GGAUGCUGUAGCUCCUGACGUA 1 ::::: :.::::: :::::: Target 557 ACUACGCCGUCGAGAACUGCAG 578							Ankyrin repeat containing protein	Cleavage	1
		4		Os08g0246100-01	miRNA 22 GGAUGCUGUAGCUCCUGACGUA 1 : ::.::.::::: :::: ::: Target 276 CGUAUGAUAUCGAAGACUUCAU 297							Hypothetical conserved gene	Translation	1
		4		Os11g0588600-01	miRNA 22 GGAUGCUGUAGCUCCUGACGUA 1 :.::.:::::.:::::: ::: Target 478 CUUAUGACAUUGAGGACAACAU 499							NB-ARC domain containing protein	Cleavage	1
		4		Os02g0286850-00	miRNA 22 GGAUGCUGUAGCUCCUGACGUA 1 ::: ::::::::::::: ::: Target 218 CCUUCGACAUCGAGGACACCAU 239							Similar to Stripe rust resistance protein Yr10	Cleavage	1
		4		Os05g0521600-01	miRNA 22 GGAUGCUGUAGCUCCUGACGUA 1 ::.: :::::::::.:: :.: Target 762 ACUGCUACAUCGAGGGCUCCGU 783							Pectin lyase fold/virulence factor domain containing protein	Cleavage
		4.5		Os11g0652100-01	miRNA 22 GGAUGCUGUAGCUCCUGACGUA 1 :::::: :. ::: :::::::: Target 398 CCUACGUCGCCGACGACUGCAU 419							NB-ARC domain containing protein	Translation	1
		4.5		Os11g0653300-01	miRNA 22 GGAUGCUGUAGCUCCUGACGUA 1 :::::: :. ::: :::::::: Target 375 CCUACGUCGCCGACGACUGCAU 396							Conserved hypothetical protein	Translation	1
		4.5		Os11g0654800-01	miRNA 22 GGAUGCUGUAGCUCCUGACGUA 1 :::::: :. ::: :::::::: Target 358 CCUACGUCGCCGACGACUGCAU 379							Conserved hypothetical protein	Translation	1
		4.5		Os06g0287700-01	miRNA 22 GGAUGCUGUAGCUCCUGACGUA 1 ::::.:::::.:: ::.::: : Target 416 CCUAUGACAUUGAAGAUUGCCU 437							Similar to NBS-LRR disease resistance protein homologue (Fragment)	Cleavage	1
		4.5		Os06g0125000-00	miRNA 22 GGAUGCUGUAGCUCCUGACGUA 1 ::::::::::.:: ::.::. : Target 251 CCUACGACAUUGAAGAUUGUCU 272							Similar to NBS-LRR disease resistance protein homologue.	Cleavage	1
		4.5	LOC_Os08g42700	Os08g0539700-01	miRNA 22 GGAUGCUGUAGCUCCUGACGUA 1 ::::::::.: :: :::::: : Target 313 CCUACGACGUGGAAGACUGCCU 334							NB-ARC domain containing protein	Translation	1
		4.5	LOC_Os08g42700	Os08g0539700-02	miRNA 22 GGAUGCUGUAGCUCCUGACGUA 1 ::::::::.: :: :::::: : Target 309 CCUACGACGUGGAAGACUGCCU 330							NB-ARC domain containing protein	Translation	1
		4.5		Os03g0624800-01	miRNA 22 GGAUGCUGUAGCUCCUGACGUA 1 :.:: :..::: ::::::::: Target 2609 CUUAAGGUAUCAAGGACUGCAG 2630							Pentatricopeptide repeat domain containing protein	Translation	1
		4.5		Os07g0574600-00	miRNA 22 GGAUGCUGUAGCUCCUGACGUA 1 ::::::::: :::::: ::. Target 471 GCUACGACAUGGAGGACGGCGA 492							Hypothetical conserved gene	Cleavage	1
		4.5		Os03g0208700-00	miRNA 22 GGAUGCUGUAGCUCCUGACGUA 1 .:: .::.::::: ::.::.:: Target 1058 UCUCUGAUAUCGAAGAUUGUAU 1079							Similar to cyclin-A2	Cleavage	1
		4.5		Os07g0687900-01	miRNA 22 GGAUGCUGUAGCUCCUGACGUA 1 .::::: :.:: :::::::: : Target 510 UCUACGCCGUCAAGGACUGCUU 531							WSI76 protein induced by water stress.	Translation	1
		4.5		Os08g0246300-01	miRNA 22 GGAUGCUGUAGCUCCUGACGUA 1 :::: :::.: :::::.::::: Target 298 CCUA-GACGUGGAGGAUUGCAU 318							NB-ARC domain containing protein	Cleavage	1
		5		Os08g0109100-01	miRNA 22 GGAUGCUGUAGCUCCUGACGUA 1 ::::.:.::::: :..::::: Target 355 CCUAUGGCAUCGCUGGUUGCAU 376							Similar to SAC domain protein 1 (FIG4-like protein AtFIG4)	Translation	1
osa-miR159a.1	TTTGGATTGAAGGGAGCTCTG	1.5	LOC_Os01g12700.1	Os01g0226800	miRNA 21 GUCUCGAGGGAAGUUAGGUUU 1 ..::::::::::.::::::: Target 803 UGGAGCUCCCUUUAAUCCAAU 823							cDNA|MYB family transcription factor, putative	Cleavage	1
		1.5	LOC_Os05g41166.1	Os05g0490600	miRNA 21 GUCUCGAGGGAAGUUAGGUUU 1 ..::::::::::.::::::: Target 1068 UGGAGCUCCCUUUAAUCCAAU 1088							cDNA|MYB family transcription factor, putative, expressed	Cleavage	1
		1.5	/	Os01g0507000-02	miRNA 21 GUCUCGAGGGAAGUUAGGUUU 1 :::::::.:::..:::::: Target 448 UUGAGCUCCUUUCGGUCCAAA 468							Conserved hypothetical protein	Cleavage	1
		2	LOC_Os04g46384.1	Os04g0549500	miRNA 21 GUCUCGAGGGAAGUUAGGUUU 1 ..::::::: :::.::::::: Target 160 UGGAGCUCCAUUCGAUCCAAA 180							cDNA|MYB family transcription factor, putative, expressed	Cleavage	1
		2	LOC_Os01g59660.1	Os01g0812000	miRNA 21 GUCUCGAGGGAAGUUAGGUUU 1 ..:::::::::::: :::::. Target 1260 UGGAGCUCCCUUCACUCCAAG 1280							cDNA|MYB family transcription factor, putative, expressed	Cleavage	1
		2	LOC_Os01g59660.4	Os01g0812000	miRNA 21 GUCUCGAGGGAAGUUAGGUUU 1 ..:::::::::::: :::::. Target 1180 UGGAGCUCCCUUCACUCCAAG 1200							cDNA|MYB family transcription factor, putative, expressed	Cleavage	1
		2	LOC_Os01g59660.3	Os01g0812000	miRNA 21 GUCUCGAGGGAAGUUAGGUUU 1 ..:::::::::::: :::::. Target 1258 UGGAGCUCCCUUCACUCCAAG 1278							cDNA|MYB family transcription factor, putative, expressed	Cleavage	1
		2	LOC_Os01g59660.2	Os01g0812000	miRNA 21 GUCUCGAGGGAAGUUAGGUUU 1 ..:::::::::::: :::::. Target 1348 UGGAGCUCCCUUCACUCCAAG 1368							cDNA|MYB family transcription factor, putative, expressed	Cleavage	1
		2	LOC_Os03g21380.1	Os03g0331700	miRNA 21 GUCUCGAGGGAAGUUAGGUUU 1 :::.:::::::: :::::: Target 1516 UUGAGUUCCCUUCAUUCCAAA 1536							cDNA|OsCML27 - Calmodulin-related calcium sensor protein, expressed	Cleavage	1
		2.5	LOC_Os09g36650.1	/	miRNA 21 GUCUCGAGGGAAGUUAGGUUU 1 :.::::::: :::::::::: Target 699 CGGAGCUCCAUUCAAUCCAAC 719							cDNA|expressed protein	Cleavage	1
		2.5	LOC_Os06g40330.1	Os06g0605600	miRNA 21 GUCUCGAGGGAAGUUAGGUUU 1 .::::::::::::: ::::: Target 1418 UAGAGCUCCCUUCACUCCAAU 1438							cDNA|MYB family transcription factor, putative, expressed	Cleavage	1
		2.5	LOC_Os05g42240.1	Os05g0501800	miRNA 21 GUCUCGAGGGAAGUUAGGUUU 1 :::::: :::::::: ::::: Target 626 CAGAGCACCCUUCAAGCCAAA 646							cDNA|expressed protein	Cleavage	1
		2.5	LOC_Os01g11430.1	Os01g0212500	miRNA 21 GUCUCGAGGGAAGUUAGGUUU 1 :.:::: :::::::: ::::: Target 1112 CGGAGCCCCCUUCAAACCAAA 1132							cDNA|expressed protein	Cleavage	1
		2.5	LOC_Os10g05230.2	Os10g0142100	miRNA 21 GUCUCGAGGGAAGUUAGGUUU 1 ::::::::::::::::. Target 335 UUUUGCUCCCUUCAAUCCAAG 355							cDNA|zinc finger, C3HC4 type domain containing protein, expressed	Cleavage	1
		2.5	LOC_Os03g38210.1	Os03g0578900	miRNA 21 GUCUCGAGGGAAGUUAGGUUU 1 : ::::::::::::: :::: Target 938 CCGAGCUCCCUUCAAGCCAAU 958							cDNA|MYB family transcription factor, putative, expressed	Cleavage	1
		2.5	LOC_Os04g46490.1	Os04g0550800	miRNA 21 GUCUCGAGGGAAGUUAGGUUU 1 :.:::.::::..:::.::: Target 1126 AUGGGCUUCCUUUGAUCUAAA 1146							cDNA|aquaporin protein, putative, expressed	Cleavage	1
osa-miR398b	TGTGTTCTCAGGTCGCCCCTG	2	LOC_Os07g46990.1	Os07g0665200	miRNA 21 GUCCCCGCUGGACUCUUGUGU 1 ::::::. .:::::::::::: Target 124 CAGGGGUCGCCUGAGAACACA 144							cDNA|copper/zinc superoxide dismutase, putative, expressed	Cleavage	1
		2.5	LOC_Os01g68770.1	Os01g0916400	miRNA 21 GUCCCCGCUGGACUCUUGUGU 1 :::.::.::::::.:::: Target 133 UCAGGGUGAUCUGAGAGCACA 153							cDNA|selenium-binding protein, putative, expressed	Cleavage	1
down-regulated
osa-miR156b-3p	GCTCACTCTCTATCTGTCAGC		/	/
osa-miR156h-3p	GCTCACTTCTCTTTCTGTCAGC	2.5	LOC_Os07g37580.1	Os07g0563000	miRNA 22 CGACUGUCUUUCUCUUCACUCG 1 ::...::::::::.:::.:: Target 481 UAUGGUGGAAAGAGAGGUGGGC 502							cDNA|diacylglycerol kinase, putative, expressed	Cleavage	1
osa-miR156f-3p
osa-miR156l-3p
		2.5	LOC_Os07g37580.2	Os07g0563000	miRNA 22 CGACUGUCUUUCUCUUCACUCG 1 ::...::::::::.:::.:: Target 368 UAUGGUGGAAAGAGAGGUGGGC 389							cDNA|diacylglycerol kinase, putative, expressed	Cleavage	1
		2.5	/	Os11g0592550-00	miRNA 22 CGACUGUCUUUCUCUUCACUCG 1 :::::.:::::::::::. Target 147 AUACACAGAGAGAGAAGUGAGU 168							Hypothetical protein.	Cleavage	1
		2.5	LOC_Os03g57569.1	Os03g0789600	miRNA 22 CGACUGUCUUUCUCUUCACUCG 1 ::::.:.:::.::::::: Target 1769 CCAAACAGGAGGAGGAGUGAGC 1790							cDNA|expressed protein	Cleavage	1
		2.5	LOC_Os07g40390.1	/	miRNA 22 CGACUGUCUUUCUCUUCACUCG 1 ::::: :.:::::.:::.:: Target 537 AAUGACAAAGAGAGAGGUGGGC 558							cDNA|expressed protein	Cleavage	1
		2.5	LOC_Os10g37020.1	Os10g0514300	miRNA 22 CGACUGUCUUUCUCUUCACUCG 1 :::.:.:::.::.:::.:: Target 79 AGCGACGGGAAGGGAGGUGGGC 100							cDNA|transposon protein, putative, unclassified, expressed	Cleavage	1
		2.5	LOC_Os09g25330.1	Os09g0420900	miRNA 22 CGACUGUCUUUCUCUUCACUCG 1 :: ::::::::.:::::: Target 58 GGAGAGAGAAAGAGGAGUGAGA 79							cDNA|BTBN19 - Bric-a-Brac, Tramtrack, Broad Complex BTB domain with non-phototropic hypocotyl 3 NPH3 domain, expressed	Cleavage	1
		2.5	LOC_Os03g44540.1	Os03g0647600	miRNA 22 CGACUGUCUUUCUCUUCACUCG 1 :: :::.::::..:::::: Target 110 CUAGAGAGAGAGAGGGGUGAGC 131							cDNA|nuclear transcription factor Y subunit, putative, expressed	Cleavage	1
		2.5	LOC_Os07g43070.1	Os07g0623600	miRNA 22 CGACUGUCUUUCUCUUCACUCG 1 :: ::::::::::: :::: Target 41 AGAGAGAGAAAGAGAAGAGAGC 62							cDNA|expressed protein	Cleavage	1
		2.5	LOC_Os02g17280.1	Os02g0272600	miRNA 22 CGACUGUCUUUCUCUUCACUCG 1 :: :::::::::::::: : Target 712 GACGAGAGAAAGAGAAGUGAUC 733							cDNA|gamma-secretase subunit APH-1B, putative, expressed	Cleavage	1
		2.5	LOC_Os11g41150.1	Os11g0629400	miRNA 22 CGACUGUCUUUCUCUUCACUCG 1 :: ::.:::::..:::::: Target 90 GGGGAGAGGAAGAGGGGUGAGC 111							cDNA|nitrilase-associated protein, putative, expressed	Cleavage	1
		2.5	/	Os05t0151150-00	miRNA 22 CGACUGUCUUUCUCUUCACUCG 1 ::: ::.:::::.:::::. Target 1030 CGAGACCGAGAGAGAGGUGAGU 1051							Hypothetical gene.	Cleavage	1
osa-miR156b-5p	TGACAGAAGAGAGTGAGCAC	1	LOC_Os11g30370.1	Os11g0496600	miRNA 20 CACGAGUGAGAGAAGACAGU 1 :::::: ::::::::::::: Target 1091 GUGCUCUCUCUCUUCUGUCA 1110							cDNA|OsSPL19 - SBP-box gene family member, expressed	Cleavage	1
osa-miR156g-5p
osa-miR156c-5p
		1	/	Os02g0445200-00	miRNA 20 CACGAGUGAGAGAAGACAGU 1 :::::: ::::::::::::: Target 464 GUGCUCUCUCUCUUCUGUCA 483							Similar to SLP16.	Cleavage	1
		1	LOC_Os09g32944.1	Os09g0507100	miRNA 20 CACGAGUGAGAGAAGACAGU 1 :::::: ::::::::::::: Target 1034 GUGCUCUCUCUCUUCUGUCA 1053							cDNA|OsSPL18 - SBP-box gene family member, expressed	Cleavage	1
		1	LOC_Os09g31438.1	Os09g0491532	miRNA 20 CACGAGUGAGAGAAGACAGU 1 :::::: ::::::::::::: Target 809 GUGCUCUCUCUCUUCUGUCA 828							cDNA|OsSPL17 - SBP-box gene family member, expressed	Cleavage	1
		1	LOC_Os06g45310.1	Os06g0663500	miRNA 20 CACGAGUGAGAGAAGACAGU 1 :::::: ::::::::::::: Target 854 GUGCUCUCUCUCUUCUGUCA 873							cDNA|OsSPL11 - SBP-box gene family member, expressed	Cleavage	1
		1	LOC_Os04g46580.1	Os04g0551500	miRNA 20 CACGAGUGAGAGAAGACAGU 1 :::::: ::::::::::::: Target 818 GUGCUCUCUCUCUUCUGUCA 837							cDNA|OsSPL7 - SBP-box gene family member, expressed	Cleavage	1
		1	LOC_Os02g07780.1	Os02g0174100	miRNA 20 CACGAGUGAGAGAAGACAGU 1 :::::: ::::::::::::: Target 987 GUGCUCUCUCUCUUCUGUCA 1006							cDNA|OsSPL4 - SBP-box gene family member, expressed	Cleavage	1
		1	LOC_Os08g41940.1	Os08g0531600	miRNA 20 CACGAGUGAGAGAAGACAGU 1 :::::: ::::::::::::: Target 1054 GUGCUCUCUCUCUUCUGUCA 1073							cDNA|OsSPL16 - SBP-box gene family member, expressed	Cleavage	1
		1	LOC_Os08g39890.1	Os08g0509600	miRNA 20 CACGAGUGAGAGAAGACAGU 1 :::::: ::::::::::::: Target 992 GUGCUCUCUCUCUUCUGUCA 1011							cDNA|OsSPL14 - SBP-box gene family member, expressed	Cleavage	1
		1	LOC_Os01g69830.1	Os01g0922600	miRNA 20 CACGAGUGAGAGAAGACAGU 1 :::::: ::::::::::::: Target 1153 GUGCUCUCUCUCUUCUGUCA 1172							cDNA|OsSPL2 - SBP-box gene family member, expressed	Cleavage	1
		1	LOC_Os06g49010.3	Os06g0703500	miRNA 20 CACGAGUGAGAGAAGACAGU 1 :::::: ::::::::::::: Target 1439 GUGCUCUCUCUCUUCUGUCA 1458							cDNA|OsSPL12 - SBP-box gene family member, expressed	Cleavage	1
		1	LOC_Os06g49010.2	Os06g0703500	miRNA 20 CACGAGUGAGAGAAGACAGU 1 :::::: ::::::::::::: Target 1494 GUGCUCUCUCUCUUCUGUCA 1513							cDNA|OsSPL12 - SBP-box gene family member, expressed	Cleavage	1
		1	LOC_Os06g49010.4	Os06g0703500	miRNA 20 CACGAGUGAGAGAAGACAGU 1 :::::: ::::::::::::: Target 1638 GUGCUCUCUCUCUUCUGUCA 1657							cDNA|OsSPL12 - SBP-box gene family member, expressed	Cleavage	1
		1	LOC_Os06g49010.1	Os06g0703500	miRNA 20 CACGAGUGAGAGAAGACAGU 1 :::::: ::::::::::::: Target 1686 GUGCUCUCUCUCUUCUGUCA 1705							cDNA|OsSPL12 - SBP-box gene family member, expressed	Cleavage	1
		1	LOC_Os06g49010.6	Os06g0703500	miRNA 20 CACGAGUGAGAGAAGACAGU 1 :::::: ::::::::::::: Target 1842 GUGCUCUCUCUCUUCUGUCA 1861							cDNA|OsSPL12 - SBP-box gene family member, expressed	Cleavage	1
		1	LOC_Os06g49010.5	Os06g0703500	miRNA 20 CACGAGUGAGAGAAGACAGU 1 :::::: ::::::::::::: Target 2018 GUGCUCUCUCUCUUCUGUCA 2037							cDNA|OsSPL12 - SBP-box gene family member, expressed	Cleavage	1
		1	LOC_Os02g07780.2	Os02g0174100	miRNA 20 CACGAGUGAGAGAAGACAGU 1 :::::: ::::::::::::: Target 2221 GUGCUCUCUCUCUUCUGUCA 2240							cDNA|OsSPL4 - SBP-box gene family member, expressed	Cleavage	1
		1	LOC_Os07g32170.2	Os07g0505200	miRNA 20 CACGAGUGAGAGAAGACAGU 1 ::::: ::::::::::::: Target 664 AUGCUCCCUCUCUUCUGUCA 683							cDNA|OsSPL13 - SBP-box gene family member, expressed	Cleavage	1
		1	LOC_Os07g32170.1	Os07g0505200	miRNA 20 CACGAGUGAGAGAAGACAGU 1 ::::: ::::::::::::: Target 852 AUGCUCCCUCUCUUCUGUCA 871							cDNA|OsSPL13 - SBP-box gene family member, expressed	Cleavage	1
		1	LOC_Os02g04680.2	Os02g0139400	miRNA 20 CACGAGUGAGAGAAGACAGU 1 ::::: ::::::::::::: Target 1962 AUGCUCUCUCUCUUCUGUCA 1981							cDNA|OsSPL3 - SBP-box gene family member, expressed	Cleavage	1
		1	LOC_Os02g04680.1	Os02g0139400	miRNA 20 CACGAGUGAGAGAAGACAGU 1 ::::: ::::::::::::: Target 1965 AUGCUCUCUCUCUUCUGUCA 1984							cDNA|OsSPL3 - SBP-box gene family member, expressed	Cleavage	1
		2	LOC_Os09g03670.1	/	miRNA 20 CACGAGUGAGAGAAGACAGU 1 ::.::::::::::: :::: Target 324 CUGUUCACUCUCUUCGGUCA 343							cDNA|retrotransposon protein, putative, unclassified, expressed	Cleavage	1
		2.5	LOC_Os05g05170.1	Os05g0143600	miRNA 20 CACGAGUGAGAGAAGACAGU 1 ::: . ::::::::::::: Target 572 AUGCGUUCUCUCUUCUGUCA 591							cDNA|jacalin-like lectin domain containing protein, expressed	Cleavage	1
osa-miR156c-3p	GCTCACTTCTCTCTCTGTCAGC	1.5	/	Os11g0592550-00	miRNA 22 CGACUGUCUCUCUCUUCACUCG 1 :::::::::::::::::. Target 147 AUACACAGAGAGAGAAGUGAGU 168							Hypothetical protein	Cleavage	1
osa-miR156g-3p
		2	LOC_Os07g40390.1	/	miRNA 22 CGACUGUCUCUCUCUUCACUCG 1 ::::: :::::::.:::.:: Target 537 AAUGACAAAGAGAGAGGUGGGC 558							cDNA|expressed protein	Cleavage	1
		2	LOC_Os03g44540.1	Os03g0647600	miRNA 22 CGACUGUCUCUCUCUUCACUCG 1 :: ::::::::..:::::: Target 110 CUAGAGAGAGAGAGGGGUGAGC 131							cDNA|nuclear transcription factor Y subunit, putative, expressed	Cleavage	1
		2	/	Os05g0151150-00	miRNA 22 CGACUGUCUCUCUCUUCACUCG 1 ::: ::::::::.:::::. Target 1030 CGAGACCGAGAGAGAGGUGAGU 1051							Hypothetical gene	Cleavage	1
		2.5	LOC_Os09g16710.1	Os09g0336500	miRNA 22 CGACUGUCUCUCUCUUCACUCG 1 :: :: ::::::.:::::::: Target 835 GCAGAGAGAGAGGGAAGUGAGG 856							cDNA|expressed protein	Cleavage	1
		2.5	LOC_Os08g42960.1	Os08g0542700	miRNA 22 CGACUGUCUCUCUCUUCACUCG 1 ::.::::::::::: :.:: Target 93 GGAGAUAGAGAGAGAAGAGGGC 114							cDNA|ankyrin repeat-containing protein, putative, expressed	Cleavage	1
		2.5	LOC_Os06g37085.1	Os06g0567666	miRNA 22 CGACUGUCUCUCUCUUCACUCG 1 ::: :::::::::::.:: Target 1318 CCAAACAAAGAGAGAAGUGGGC 1339							cDNA|transposon protein, putative, unclassified, expressed	Cleavage	1
		2.5	LOC_Os07g13319.1	/	miRNA 22 CGACUGUCUCUCUCUUCACUCG 1 ::::::::::..:::::. Target 153 GAAAACAGAGAGAGGGGUGAGU 174							cDNA|hypothetical protein	Cleavage	1
		2.5	LOC_Os04g39240.1	Os04g0467100	miRNA 22 CGACUGUCUCUCUCUUCACUCG 1 :: :::::::::::::: : Target 206 AGAGAAAGAGAGAGAAGUGAAC 227							cDNA|expressed protein	Cleavage	1
		2.5	LOC_Os01g25450.1	Os01g0356800	miRNA 22 CGACUGUCUCUCUCUUCACUCG 1 :: : ::::.::::::::: Target 4594 UUGGAGACAGAGGGAAGUGAGC 4615							cDNA|AIG1 family protein, expressed	Cleavage	1
		2.5	LOC_Os10g37620.1	/	miRNA 22 CGACUGUCUCUCUCUUCACUCG 1 :: ::::::.:.::::.:: Target 75 CGGGAGAGAGAGGGGAGUGGGC 96							cDNA|retrotransposon protein, putative, unclassified, expressed	Cleavage	1
		2.5	LOC_Os04g08776.1	/	miRNA 22 CGACUGUCUCUCUCUUCACUCG 1 :: ::::.:.::::::.:: Target 928 CGGGAGAGAGGGGGAAGUGGGC 949							cDNA|retrotransposon protein, putative, Ty3-gypsy subclass, expressed	Cleavage	1
		2.5	LOC_Os12g04800.1	/	miRNA 22 CGACUGUCUCUCUCUUCACUCG 1 :: ::::::.:.::::.:: Target 390 CGGGAGAGAGAGGGGAGUGGGC 411							cDNA|retrotransposon protein, putative, Ty3-gypsy subclass, expressed	Cleavage	1
osa-miR156l-5p	CGACAGAAGAGAGTGAGCATA	2	LOC_Os11g30370.1	Os11g0496600	miRNA 21 AUACGAGUGAGAGAAGACAGC 1 :.::::: :::::::::::: Target 1090 UGUGCUCUCUCUCUUCUGUCA 1110							cDNA|OsSPL19 - SBP-box gene family member, expressed	Cleavage	1
		2	/	Os02g0445200-00	miRNA 21 AUACGAGUGAGAGAAGACAGC 1 :.::::: :::::::::::: Target 463 UGUGCUCUCUCUCUUCUGUCA 483							Similar to SLP16	Cleavage	1
		2	LOC_Os09g32944.1	Os09g0507100	miRNA 21 AUACGAGUGAGAGAAGACAGC 1 :.::::: :::::::::::: Target 1033 UGUGCUCUCUCUCUUCUGUCA 1053							cDNA|OsSPL18 - SBP-box gene family member, expressed	Cleavage	1
		2	LOC_Os09g31438.1	Os09g0491532	miRNA 21 AUACGAGUGAGAGAAGACAGC 1 :.::::: :::::::::::: Target 808 UGUGCUCUCUCUCUUCUGUCA 828							cDNA|OsSPL17 - SBP-box gene family member, expressed	Cleavage	1
		2	LOC_Os08g41940.1	Os08g0531600	miRNA 21 AUACGAGUGAGAGAAGACAGC 1 :.::::: :::::::::::: Target 1053 UGUGCUCUCUCUCUUCUGUCA 1073							cDNA|OsSPL16 - SBP-box gene family member, expressed	Cleavage	1
		2	LOC_Os08g39890.1	Os08g0509600	miRNA 21 AUACGAGUGAGAGAAGACAGC 1 :.::::: :::::::::::: Target 991 UGUGCUCUCUCUCUUCUGUCA 1011							cDNA|OsSPL14 - SBP-box gene family member, expressed	Cleavage	1
		2	LOC_Os01g69830.1	Os01g0922600	miRNA 21 AUACGAGUGAGAGAAGACAGC 1 :.::::: :::::::::::: Target 1152 UGUGCUCUCUCUCUUCUGUCA 1172							cDNA|OsSPL2 - SBP-box gene family member, expressed	Cleavage	1
		2	LOC_Os07g32170.2	Os07g0505200	miRNA 21 AUACGAGUGAGAGAAGACAGC 1 :::::: :::::::::::: Target 663 CAUGCUCCCUCUCUUCUGUCA 683							cDNA|OsSPL13 - SBP-box gene family member, expressed	Cleavage	1
		2	LOC_Os07g32170.1	Os07g0505200	miRNA 21 AUACGAGUGAGAGAAGACAGC 1 :::::: :::::::::::: Target 851 CAUGCUCCCUCUCUUCUGUCA 871							cDNA|OsSPL13 - SBP-box gene family member, expressed	Cleavage	1
		2	LOC_Os02g04680.2	Os02g0139400	miRNA 21 AUACGAGUGAGAGAAGACAGC 1 :::::: :::::::::::: Target 1961 CAUGCUCUCUCUCUUCUGUCA 1981							cDNA|OsSPL3 - SBP-box gene family member, expressed	Cleavage	1
		2	LOC_Os02g04680.1	Os02g0139400	miRNA 21 AUACGAGUGAGAGAAGACAGC 1 :::::: :::::::::::: Target 1964 CAUGCUCUCUCUCUUCUGUCA 1984							cDNA|OsSPL3 - SBP-box gene family member, expressed	Cleavage	1
		2	LOC_Os06g45310.1	Os06g0663500	miRNA 21 AUACGAGUGAGAGAAGACAGC 1 .::::: :::::::::::: Target 853 CGUGCUCUCUCUCUUCUGUCA 873							cDNA|OsSPL11 - SBP-box gene family member, expressed	Cleavage	1
		2	LOC_Os04g46580.1	Os04g0551500	miRNA 21 AUACGAGUGAGAGAAGACAGC 1 .::::: :::::::::::: Target 817 GGUGCUCUCUCUCUUCUGUCA 837							cDNA|OsSPL7 - SBP-box gene family member, expressed	Cleavage	1
		2	LOC_Os02g07780.1	Os02g0174100	miRNA 21 AUACGAGUGAGAGAAGACAGC 1 .::::: :::::::::::: Target 986 CGUGCUCUCUCUCUUCUGUCA 1006							cDNA|OsSPL4 - SBP-box gene family member, expressed	Cleavage	1
		2	LOC_Os06g49010.3	Os06g0703500	miRNA 21 AUACGAGUGAGAGAAGACAGC 1 .::::: :::::::::::: Target 1438 CGUGCUCUCUCUCUUCUGUCA 1458							cDNA|OsSPL12 - SBP-box gene family member, expressed	Cleavage	1
		2	LOC_Os06g49010.2	Os06g0703500	miRNA 21 AUACGAGUGAGAGAAGACAGC 1 .::::: :::::::::::: Target 1493 CGUGCUCUCUCUCUUCUGUCA 1513							cDNA|OsSPL12 - SBP-box gene family member, expressed	Cleavage	1
		2	LOC_Os06g49010.4	Os06g0703500	miRNA 21 AUACGAGUGAGAGAAGACAGC 1 .::::: :::::::::::: Target 1637 CGUGCUCUCUCUCUUCUGUCA 1657							cDNA|OsSPL12 - SBP-box gene family member, expressed	Cleavage	1
		2	LOC_Os06g49010.1	Os06g0703500	miRNA 21 AUACGAGUGAGAGAAGACAGC 1 .::::: :::::::::::: Target 1685 CGUGCUCUCUCUCUUCUGUCA 1705							cDNA|OsSPL12 - SBP-box gene family member, expressed	Cleavage	1
		2	LOC_Os06g49010.6	Os06g0703500	miRNA 21 AUACGAGUGAGAGAAGACAGC 1 .::::: :::::::::::: Target 1841 CGUGCUCUCUCUCUUCUGUCA 1861							cDNA|OsSPL12 - SBP-box gene family member, expressed	Cleavage	1
		2	LOC_Os06g49010.5	Os06g0703500	miRNA 21 AUACGAGUGAGAGAAGACAGC 1 .::::: :::::::::::: Target 2017 CGUGCUCUCUCUCUUCUGUCA 2037							cDNA|OsSPL12 - SBP-box gene family member, expressed	Cleavage	1
		2	LOC_Os02g07780.2	Os02g0174100	miRNA 21 AUACGAGUGAGAGAAGACAGC 1 .::::: :::::::::::: Target 2220 CGUGCUCUCUCUCUUCUGUCA 2240							cDNA|OsSPL4 - SBP-box gene family member, expressed	Cleavage	1
		2.5	LOC_Os02g04450.3	Os02g0137100	miRNA 21 AUACGAGUGAGAGAAGACAGC 1 ::::::: ::.:.::.::::: Target 670 UAUGCUCUCUUUUUUUUGUCG 690							cDNA|plant-specific domain TIGR01589 family protein, putative, expressed	Cleavage	1
		2.5	LOC_Os03g57040.1	Os03g0783700	miRNA 21 AUACGAGUGAGAGAAGACAGC 1 :::.:..:::::::.:::.: Target 587 GAUGUUUGCUCUCUUUUGUUG 607							cDNA|clathrin adaptor complex small chain domain containing protein, expressed	Cleavage	1
		2.5	LOC_Os03g57040.2	Os03g0783700	miRNA 21 AUACGAGUGAGAGAAGACAGC 1 :::.:..:::::::.:::.: Target 801 GAUGUUUGCUCUCUUUUGUUG 821							cDNA|clathrin adaptor complex small chain domain containing protein, expressed	Cleavage	1
		2.5	LOC_Os02g06600.1	Os02g0161450	miRNA 21 AUACGAGUGAGAGAAGACAGC 1 : :::..::.:::::::::: Target 2223 GAGGCUUGCUUUCUUCUGUCG 2243							cDNA|receptor-like protein kinase 2 precursor, putative, expressed	Cleavage	1
				Os02g0161500
		2.5	LOC_Os03g49710.1	Os03g0704000	miRNA 21 AUACGAGUGAGAGAAGACAGC 1 :::: :::::::::::.: Target 827 CUUGCUGUCUCUCUUCUGUUG 847							cDNA|ribosomal protein S13p/S18e, putative, expressed	Cleavage	1
		2.5	/	Os06g0470075-00	miRNA 21 AUACGAGUGAGAGAAGACAGC 1 : .:::.:::.:::::::: Target 1286 CCUCUUCAUUCUUUUCUGUCG 1306							Hypothetical protein	Cleavage	1
		2.5	/	Os04g0632400-04	miRNA 21 AUACGAGUGAGAGAAGACAGC 1 .: : ::::.:::::::::: Target 936 AGUACACACUUUCUUCUGUCG 956							Hypothetical gene	Cleavage	1
osa-miR1883b	ACCTGTGACGGGCCGAGAATGGAA	2	LOC_Os10g12110.1	/	miRNA 24 AAGGUAAGAGCCGGGCAGUGUCCA 1 ::.. :::.::::.::::::::: Target 46 UUUUCCUCUUGGCCUGUCACAGGU 69							cDNA|transposon protein, putative, CACTA, En/Spm sub-class, expressed	Cleavage	1
osa-miR1883a
		2.5	LOC_Os11g12450.1	/	miRNA 24 AAGGUAAGAGCCGGGCAGUGUCCA 1 .: .: :::::::::::::: Target 3235 CAGAGUGUUGGGCCCGUCACAGGU 3258							cDNA|transposon protein, putative, CACTA, En/Spm sub-class, expressed	Cleavage	1
		2.5	LOC_Os04g08150.1	/	miRNA 24 AAGGUAAGAGCCGGGCAGUGUCCA 1 ::.: ::: ::::.:::::::::: Target 188 UUUCCUUC-CGGCUCGUCACAGGU 210							cDNA|transposon protein, putative, CACTA, En/Spm sub-class, expressed	Cleavage	1
		2.5	LOC_Os01g39385.1	Os01g0575901	miRNA 24 AAGGUAAGAGCCGGGCAGUGUCCA 1 ::.::::::.:::::: :: Target 5991 GGCGUUUUUCGGCCUGUCACACGU 6014							cDNA|expressed protein	Cleavage	1
		2.5	LOC_Os07g16880.1	/	miRNA 24 AAGGUAAGAGCCGGGCAGUGUCCA 1 :.: :::::::::::::: Target 21 UGAGGGUUUGGGCCCGUCACAGGU 44							cDNA|retrotransposon protein, putative, unclassified, expressed	Cleavage	1
osa-miR1862c	ACGAGGTTGGTTTATTTTGGGACG	1.5	LOC_Os02g37694.1	Os02g0589600	miRNA 24 GCAGGGUUUUAUUUGGUUGGAGCA 1 :::::::::::::::::::: : Target 1090 UAUCCCAAAAUAAACCAACCUCAU 1113							cDNA|expressed protein	Cleavage	1
osa-miR1862a
osa-miR1862b
		1.5	LOC_Os07g37560.3	Os07g0562800	miRNA 24 GCAGGGUUUUAUUUGGUUGGAGCA 1 ::.::.::::::.::::::.:: Target 1133 AUUCUCAGAAUAAAUCAACCUUGU 1156							cDNA|myosin-Vb, putative, expressed	Cleavage	1
		1.5	LOC_Os07g37560.2	Os07g0562800	miRNA 24 GCAGGGUUUUAUUUGGUUGGAGCA 1 ::.::.::::::.::::::.:: Target 2301 AUUCUCAGAAUAAAUCAACCUUGU 2324							cDNA|myosin-Vb, putative, expressed	Cleavage	1
		1.5	LOC_Os07g37560.1	Os07g0562800	miRNA 24 GCAGGGUUUUAUUUGGUUGGAGCA 1 ::.::.::::::.::::::.:: Target 2301 AUUCUCAGAAUAAAUCAACCUUGU 2324							cDNA|myosin-Vb, putative, expressed	Cleavage	1
			/	Os08g0498600-02	miRNA 24 GCAGGGUUUUAUUUGGUUGGAGCA 1 :::.::::::::: ::::::::: Target 1736 GGUCUCAAAAUAAAACAACCUCGU 1759							Similar to Caffeoyl-CoA 3-O-methyltransferase (Fragment).	Translation	1
			/	Os08g0498600-01	miRNA 24 GCAGGGUUUUAUUUGGUUGGAGCA 1 :::.::::::::: ::::::::: Target 1839 GGUCUCAAAAUAAAACAACCUCGU 1862							Similar to Caffeoyl-CoA 3-O-methyltransferase (Fragment).	Translation	1
		2	LOC_Os07g28260.1	Os07g0466200	miRNA 24 GCAGGGUUUUAUUUGGUUGGAGCA 1 .::.::::::::::::::: :.:: Target 1810 UGUUCCAAAAUAAACCAACAUUGU 1833							cDNA|expressed protein	Cleavage	1
		2	LOC_Os07g28260.6	Os07g0466200	miRNA 24 GCAGGGUUUUAUUUGGUUGGAGCA 1 .::.::::::::::::::: :.:: Target 1946 UGUUCCAAAAUAAACCAACAUUGU 1969							cDNA|expressed protein	Cleavage	1
		2	LOC_Os07g28260.5	Os07g0466200	miRNA 24 GCAGGGUUUUAUUUGGUUGGAGCA 1 .::.::::::::::::::: :.:: Target 2064 UGUUCCAAAAUAAACCAACAUUGU 2087							cDNA|expressed protein	Cleavage	1
		2	LOC_Os07g28260.4	Os07g0466200	miRNA 24 GCAGGGUUUUAUUUGGUUGGAGCA 1 .::.::::::::::::::: :.:: Target 2161 UGUUCCAAAAUAAACCAACAUUGU 2184							cDNA|expressed protein	Cleavage	1
		2	LOC_Os03g52280.1	Os03g0733000	miRNA 24 GCAGGGUUUUAUUUGGUUGGAGCA 1 ::. :::::::::::::.:: :: Target 700 AGUUGCAAAAUAAACCAAUCUAGU 723							cDNA|expressed protein	Cleavage	1
		2.5	LOC_Os04g31360.1	/	miRNA 24 GCAGGGUUUUAUUUGGUUGGAGCA 1 :.::.::::::..::.::.:: Target 71 GCCCUCAGAAUAAAUUAAUCUUGU 94							cDNA|hypothetical protein	Cleavage	1
		2.5	/	Os09g0296450-00	miRNA 24 GCAGGGUUUUAUUUGGUUGGAGCA 1 .:::.::::::::::: :: Target 171 GUUGAUAAAGUAAACCAACCUAGU 194							Hypothetical protein.	Cleavage	1
		2.5	/	Os02g0165200-01	miRNA 24 GCAGGGUUUUAUUUGGUUGGAGCA 1 ::::.::::.:::..:.:: Target 2438 UCAGACAAAGUAAAUCAAUUUUGU 2461							Hypothetical protein.	Cleavage	1
		2.5	/	Os02t0179250-01	miRNA 24 GCAGGGUUUUAUUUGGUUGGAGCA 1 .:::::: :::::::::: :: Target 523 CCGUCCAAAAAAAACCAACCUAGU 546							Hypothetical gene.	Cleavage	1
		2.5	/	Os03t0818700-00	miRNA 24 GCAGGGUUUUAUUUGGUUGGAGCA 1 :.:.:: :::::::::::: Target 135 GGCGGCGAGAUCAACCAACCUCGU 158							Similar to MYB transcription factor.	Cleavage	1
osa-miR1862d	ACTAGGTTTGTTTATTTTGGGACG	1.5	LOC_Os02g39070.1	Os02g0602800	miRNA 24 GCAGGGUUUUAUUUGUUUGGAUCA 1 : :: .::::::::.::::.:::: Target 1001 CAUCGUAAAAUAAAUAAACUUAGU 1024							cDNA|vesicle transport protein GOT1B, putative, expressed	Cleavage	1
		1.5	LOC_Os02g39070.2	Os02g0602800	miRNA 24 GCAGGGUUUUAUUUGUUUGGAUCA 1 : :: .::::::::.::::.:::: Target 1083 CAUCGUAAAAUAAAUAAACUUAGU 1106							cDNA|vesicle transport protein GOT1B, putative, expressed	Cleavage	1
		2	LOC_Os03g52280.1	Os03g0733000	miRNA 24 GCAGGGUUUUAUUUGUUUGGAUCA 1 ::. :::::::::: ::.::::: Target 700 AGUUGCAAAAUAAACCAAUCUAGU 723							cDNA|expressed protein	Cleavage	1
		2	LOC_Os05g25890.1	Os05g0324300	miRNA 24 GCAGGGUUUUAUUUGUUUGGAUCA 1 : : .::.:::::::::: ::::: Target 802 CAUAUCAGAAUAAACAAAACUAGU 825							cDNA|expressed protein	Cleavage	1
			/	Os09g0296450-00	miRNA 24 GCAGGGUUUUAUUUGUUUGGAUCA 1 .:::.::::: :::::::: Target 171 GUUGAUAAAGUAAACCAACCUAGU 194							Hypothetical protein.	Translation
		2.5	LOC_Os10g40960.1	Os10g0558900	miRNA 24 GCAGGGUUUUAUUUGUUUGGAUCA 1 : :::.::::::::.:::: :::: Target 989 CAUCCUAAAAUAAAUAAACAUAGU 1012							cDNA|oxidoreductase, 2OG-Fe oxygenase family protein, putative, expressed	Cleavage	1
		2.5	LOC_Os02g30730.1	Os02g0511500	miRNA 24 GCAGGGUUUUAUUUGUUUGGAUCA 1 .:::::: :: :::::::.::::: Target 2708 UGUCCCAUAAAAAACAAAUCUAGU 2731							cDNA|SART-1 family protein, putative, expressed	Cleavage	1
		2.5	LOC_Os02g30730.2	Os02g0511500	miRNA 24 GCAGGGUUUUAUUUGUUUGGAUCA 1 .:::::: :: :::::::.::::: Target 2784 UGUCCCAUAAAAAACAAAUCUAGU 2807							cDNA|SART-1 family protein, putative, expressed	Cleavage	1
		2.5	LOC_Os03g17634.1	Os03g0284900	miRNA 24 GCAGGGUUUUAUUUGUUUGGAUCA 1 ... :::::::.:::.::::: Target 3436 UUAUUUUAAAUAAAUAAAUCUAGU 3459							cDNA|PPR repeat domain containing protein, putative, expressed	Cleavage	1
		2.5	/	Os06g0667300-01	miRNA 24 GCAGGGUUUUAUUUGUUUGGAUCA 1 .::::::::: :::::::.::::: Target 1946 UGUCCCAAAA-AAACAAAUCUAGU 1968							Non-protein coding transcript.	Cleavage	1
osa-miR167h-3p	AGGTCATGCTGTAGTTTCATC	1	LOC_Os01g20900.7	Os01g0310800	miRNA 21 CUACUUUGAUGUCGUACUGGA 1 : :::::::::::::::::: Target 610 CAAGAAACUACAGCAUGACCU 630							cDNA|OsWAK4 - OsWAK receptor-like cytoplasmic kinase OsWAK-RLCK, expressed	Cleavage	1
		1	LOC_Os01g20900.6	Os01g0310800	miRNA 21 CUACUUUGAUGUCGUACUGGA 1 : :::::::::::::::::: Target 610 CAAGAAACUACAGCAUGACCU 630							cDNA|OsWAK4 - OsWAK receptor-like cytoplasmic kinase OsWAK-RLCK, expressed	Cleavage	1
		1	LOC_Os01g20900.2	Os01g0310800	miRNA 21 CUACUUUGAUGUCGUACUGGA 1 : :::::::::::::::::: Target 610 CAAGAAACUACAGCAUGACCU 630							cDNA|OsWAK4 - OsWAK receptor-like cytoplasmic kinase OsWAK-RLCK, expressed	Cleavage	1
		1	LOC_Os01g20900.1	Os01g0310800	miRNA 21 CUACUUUGAUGUCGUACUGGA 1 : :::::::::::::::::: Target 610 CAAGAAACUACAGCAUGACCU 630							cDNA|OsWAK4 - OsWAK receptor-like cytoplasmic kinase OsWAK-RLCK, expressed	Cleavage	1
		1	LOC_Os01g20900.5	Os01g0310800	miRNA 21 CUACUUUGAUGUCGUACUGGA 1 : :::::::::::::::::: Target 610 CAAGAAACUACAGCAUGACCU 630							cDNA|OsWAK4 - OsWAK receptor-like cytoplasmic kinase OsWAK-RLCK, expressed	Cleavage	1
		1	LOC_Os01g20900.3	Os01g0310800	miRNA 21 CUACUUUGAUGUCGUACUGGA 1 : :::::::::::::::::: Target 610 CAAGAAACUACAGCAUGACCU 630							cDNA|OsWAK4 - OsWAK receptor-like cytoplasmic kinase OsWAK-RLCK, expressed	Cleavage	1
		2.5	/	Os07g0495250-01	miRNA 21 CUACUUUGAUGUCGUACUGGA 1 ::::.: :::::::::.:: Target 953 CUUGAAGCAACAGCAUGAUCU 973							Hypothetical gene.	Cleavage	1
		2.5	/	Os04g0538800-01	miRNA 21 CUACUUUGAUGUCGUACUGGA 1 ::::..::::::.:::..: Target 1525 AUUGAAGUUACAGCGUGAUUU 1545							Similar to Kinesin heavy chain (Fragment)	Cleavage	1
		2.5	/	Os02g0280400-01	miRNA 21 CUACUUUGAUGUCGUACUGGA 1 :: ::::.:::::::::: Target 1036 UCUGUAACUGCAGCAUGACCA 1056							Similar to casein kinase I isoform delta-like.	Cleavage	1
osa-miR167b	TGAAGCTGCCAGCATGATCTA	1	LOC_Os01g20900.4	Os01g0310800	miRNA 21 CUACUUUGAUGUCGUACUGGA 1 : :::::::::::::::::: Target 610 CAAGAAACUACAGCAUGACCU 630							cDNA|OsWAK4 - OsWAK receptor-like cytoplasmic kinase OsWAK-RLCK, expressed	Cleavage	1
osa-miR167a-5p
osa-miR167c-5p
		2	LOC_Os03g25950.1	/	miRNA 21 CUACUUUGAUGUCGUACUGGA 1 .:::::::.:::: :::::: Target 510 AGUGAAACUGCAGCUUGACCU 530							cDNA|expressed protein	Cleavage	1
		2.5	LOC_Os04g45580.1	Os04g0538800	miRNA 21 CUACUUUGAUGUCGUACUGGA 1 ::::..::::::.:::..: Target 1557 AUUGAAGUUACAGCGUGAUUU 1577							cDNA|kinesin motor domain containing protein, expressed	Cleavage	1
		2.5	/	Os06g0129100	miRNA 21 AUCUAGUACGACCGUCGAAGU 1 : :::::: :::::::::: Target 1084 GUGUUCAUGCCGGCAGCUUCA 1104							Short-chain dehydrogenase/reductase SDR family protein.	Translation	1
		2.5	/	Os07g0522600	miRNA 21 AUCUAGUACGACCGUCGAAGU 1 :. : :::::::::::::: Target 3397 CUGGGCUUGCUGGCAGCUUCA 3417							Similar to Glutamate receptor 3.4 precursor (Ligand-gated ion channel 3.4) (AtGLR4). Splice isoform 2.	Cleavage	1
osa-miR167h-5p	TGAAGCTGCCAGCATGATCTG	2.5	LOC_Os06g03830.1	Os06g0129100	miRNA 21 GUCUAGUACGACCGUCGAAGU 1 : :::::: :::::::::: Target 1087 GUGUUCAUGCCGGCAGCUUCA 1107							cDNA|retinol dehydrogenase, putative, expressed	Translation	1
osa-miR167f
osa-miR167d-5p
osa-miR167g
osa-miR167j		2.5	LOC_Os06g03830.2	Os06g0129100	miRNA 21 GUCUAGUACGACCGUCGAAGU 1 : :::::: :::::::::: Target 1495 GUGUUCAUGCCGGCAGCUUCA 1515							cDNA|retinol dehydrogenase, putative, expressed	Translation	1
		2.5	LOC_Os07g33790.1	Os07g0522600	miRNA 21 GUCUAGUACGACCGUCGAAGU 1 : :. : :::::::::::::: Target 3419 CUGGGCUUGCUGGCAGCUUCA 3439							cDNA|glutamate receptor 3.4 precursor, putative, expressed	Cleavage	1
osa-miR167e-3p/i-3p	AGATCATGTTGCAGCTTCACT	2	LOC_Os08g12760.3	Os08g0224200	miRNA 21 UCACUUCGACGUUGUACUAGA 1 .::::::::: ::::::.::: Target 1450 GGUGAAGCUGGAACAUGGUCU 1470							cDNA|YT521-B, putative, expressed	Translation	1
		2	LOC_Os08g12760.4	Os08g0224200	miRNA 21 UCACUUCGACGUUGUACUAGA 1 .::::::::: ::::::.::: Target 1472 GGUGAAGCUGGAACAUGGUCU 1492							cDNA|YT521-B, putative, expressed	Translation	1
		2	LOC_Os08g12760.2	Os08g0224200	miRNA 21 UCACUUCGACGUUGUACUAGA 1 .::::::::: ::::::.::: Target 1504 GGUGAAGCUGGAACAUGGUCU 1524							cDNA|YT521-B, putative, expressed	Translation	1
		2	LOC_Os08g12760.1	Os08g0224200	miRNA 21 UCACUUCGACGUUGUACUAGA 1 .::::::::: ::::::.::: Target 1525 GGUGAAGCUGGAACAUGGUCU 1545							cDNA|YT521-B, putative, expressed	Translation	1
		2.5	LOC_Os12g32120.1	/	miRNA 21 UCACUUCGACGUUGUACUAGA 1 :::::::::..::: :::: Target 1527 UUUGAAGCUGCGGCAUAAUCU 1547							cDNA|transposon protein, putative, CACTA, En/Spm sub-class, expressed	Cleavage	1
		2.5	LOC_Os08g17030.1	/	miRNA 21 UCACUUCGACGUUGUACUAGA 1 :::::::::..::: :::: Target 1404 UUUGAAGCUGCGGCAUAAUCU 1424							cDNA|transposon protein, putative, CACTA, En/Spm sub-class, expressed	Cleavage	1
		2.5	LOC_Os10g11250.1	/	miRNA 21 UCACUUCGACGUUGUACUAGA 1 :::::::::..::: :::: Target 1827 UUUGAAGCUGCGGCAUAAUCU 1847							cDNA|transposon protein, putative, CACTA, En/Spm sub-class, expressed	Cleavage	1
		2.5	/	Os01g0809450	miRNA 21 UCACUUCGACGUUGUACUAGA 1 : :: ::::::.::::::: Target 3438 UCUUAAUCUGCAAUAUGAUCU 3458							Hypothetical gene	Cleavage	1
osa-miR1878	ACTTAATCTGGACACTATAAAAGA	2	LOC_Os03g60820.1	Os03g0823100	miRNA 24 AGAAAAUAUCACAGGUCUAAUUCA 1 ::.:.::::..::::::::: Target 275 AAAAUUGUGGUGUUUAGAUUAAGU 298							cDNA|transporter, major facilitator superfamily domain containing protein, expressed	Cleavage	1
				Os03g0823200
				Os03g0823301
		2	LOC_Os08g37380.1	Os08g0478800	miRNA 24 AGAAAAUAUCACAGGUCUAAUUCA 1 ::::::::::::::::: Target 1072 CUAGGAAUAGUGUCCAGAUUAAGG 1095							cDNA|glucose-6-phosphate isomerase, putative, expressed	Cleavage	1
		2	LOC_Os08g37380.2	Os08g0478800	miRNA 24 AGAAAAUAUCACAGGUCUAAUUCA 1 ::::::::::::::::: Target 1072 CUAGGAAUAGUGUCCAGAUUAAGG 1095							cDNA|glucose-6-phosphate isomerase, putative, expressed	Cleavage	1
osa-miR166i-3p	TCGGATCAGGCTTCATTCCTC	0	LOC_Os03g44835.1	Os03g0651201	miRNA 21 CUCCUUACUUCGGACUAGGCU 1 ::::::::::::::::::::: Target 1245 GAGGAAUGAAGCCUGAUCCGA 1265							cDNA|expressed protein	Cleavage	1
		1.5	LOC_Os03g01890.1	Os03g0109400	miRNA 21 CUCCUUACUUCGGACUAGGCU 1 ::.::::::::::.::::. Target 1089 CUGGGAUGAAGCCUGGUCCGG 1109							cDNA|START domain containing protein, expressed	Cleavage	1
		1.5	LOC_Os10g33960.1	Os10g0480200	miRNA 21 CUCCUUACUUCGGACUAGGCU 1 ::.::::::::::.::::. Target 924 CUGGGAUGAAGCCUGGUCCGG 944							cDNA|START domain containing protein, expressed	Cleavage	1
		1.5	LOC_Os12g41860.1	Os12g0612700	miRNA 21 CUCCUUACUUCGGACUAGGCU 1 ::.::::::::::.::::. Target 877 UUGGGAUGAAGCCUGGUCCGG 897							cDNA|START domain containing protein, expressed	Cleavage	1
		1.5	LOC_Os03g43930.1	Os03g0640800	miRNA 21 CUCCUUACUUCGGACUAGGCU 1 ::.::::::::::.::::. Target 955 UUGGGAUGAAGCCUGGUCCGG 975							cDNA|START domain containing protein, expressed	Cleavage	1
		1.5	LOC_Os03g43930.2	Os03g0640800	miRNA 21 CUCCUUACUUCGGACUAGGCU 1 ::.::::::::::.::::. Target 955 UUGGGAUGAAGCCUGGUCCGG 975							cDNA|START domain containing protein, expressed	Cleavage	1
		1.5	LOC_Os10g33960.2	Os10g0480200	miRNA 21 CUCCUUACUUCGGACUAGGCU 1 ::.::::::::::.::::. Target 696 CUGGGAUGAAGCCUGGUCCGG 716							cDNA|START domain containing protein, expressed	Cleavage	1
		1.5	LOC_Os03g01890.2	Os03g0109400	miRNA 21 CUCCUUACUUCGGACUAGGCU 1 ::.::::::::::.::::. Target 1089 CUGGGAUGAAGCCUGGUCCGG 1109							cDNA|START domain containing protein, expressed	Cleavage	1
		1.5	LOC_Os05g34460.1	Os05g0417100	miRNA 21 CUCCUUACUUCGGACUAGGCU 1 ::.::::::::::::..:: Target 1127 UUGGGAUGAAGCCUGAUUUGA 1147							cDNA|OsDegp7 - Putative Deg protease homologue, expressed	Cleavage	1
		1.5	LOC_Os10g33960.4	Os10g0480200	miRNA 21 CUCCUUACUUCGGACUAGGCU 1 ::.::::::::::.::::. Target 924 CUGGGAUGAAGCCUGGUCCGG 944							cDNA|START domain containing protein, expressed	Cleavage	1
		1.5	LOC_Os10g33960.3	Os10g0480200	miRNA 21 CUCCUUACUUCGGACUAGGCU 1 ::.::::::::::.::::. Target 924 CUGGGAUGAAGCCUGGUCCGG 944							cDNA|START domain containing protein, expressed	Cleavage	1
		2	LOC_Os02g49670.1	Os02g0729300	miRNA 21 CUCCUUACUUCGGACUAGGCU 1 .::.: ::::::::.::::: Target 2815 CGGGGAAGAAGCCUGGUCCGA 2835							cDNA|zinc knuckle family protein, expressed	Cleavage	1
		2.5	LOC_Os04g44380.1	Os04g0525400	miRNA 21 CUCCUUACUUCGGACUAGGCU 1 :::: :::::::::.:.::. Target 255 UAGGACUGAAGCCUGGUUCGG 275							cDNA|expressed protein	Cleavage	1
		2.5	LOC_Os04g46570.2	Os04g0551300	miRNA 21 CUCCUUACUUCGGACUAGGCU 1 .::.: ::::::::::::: Target 194 UGGGGAGGAAGCCUGAUCCGU 214							cDNA|growth regulator related protein, putative, expressed	Cleavage	1
		2.5	LOC_Os04g46570.1	Os04g0551300	miRNA 21 CUCCUUACUUCGGACUAGGCU 1 .::.: ::::::::::::: Target 194 UGGGGAGGAAGCCUGAUCCGU 214							cDNA|growth regulator related protein, putative, expressed	Cleavage	1
		2.5	LOC_Os04g05700.1	Os04g0142600	miRNA 21 CUCCUUACUUCGGACUAGGCU 1 .::.:: .:::::::::.:: Target 1838 AGGGGAUUGAGCCUGAUCUGA 1858							cDNA|expressed protein	Cleavage	1
		2.5	LOC_Os03g56920.1	Os03g0782100	miRNA 21 CUCCUUACUUCGGACUAGGCU 1 .::: :::::::::.:.::. Target 1533 UGGGACUGAAGCCUGGUUCGG 1553							cDNA|expressed protein	Cleavage	1
osa-miR166b-3p	TCGGACCAGGCTTCATTCCCC	1	LOC_Os03g01890.1	Os03g0109400	miRNA 21 CCCCUUACUUCGGACCAGGCU 1 ::.:::::::::::::::. Target 1089 CUGGGAUGAAGCCUGGUCCGG 1109							cDNA|START domain containing protein, expressed	Cleavage	1
osa-miR166a-3p
osa-miR166f
osa-miR166d-3p
osa-miR166j-3p		1	LOC_Os10g33960.1	Os10g0480200	miRNA 21 CCCCUUACUUCGGACCAGGCU 1 ::.:::::::::::::::. Target 924 CUGGGAUGAAGCCUGGUCCGG 944							cDNA|START domain containing protein, expressed	Cleavage	1
osa-miR166c-3p
osa-miR166g-3p	TCGGACCAGGCTTCATTCCTC
osa-miR166h-3p		1	LOC_Os12g41860.1	Os12g0612700	miRNA 21 CCCCUUACUUCGGACCAGGCU 1 ::.:::::::::::::::. Target 877 UUGGGAUGAAGCCUGGUCCGG 897							cDNA|START domain containing protein, expressed	Cleavage	1
		1	LOC_Os03g43930.1	Os03g0640800	miRNA 21 CCCCUUACUUCGGACCAGGCU 1 ::.:::::::::::::::. Target 955 UUGGGAUGAAGCCUGGUCCGG 975							cDNA|START domain containing protein, expressed	Cleavage	1
		1	LOC_Os03g43930.2	Os03g0640800	miRNA 21 CCCCUUACUUCGGACCAGGCU 1 ::.:::::::::::::::. Target 955 UUGGGAUGAAGCCUGGUCCGG 975							cDNA|START domain containing protein, expressed	Cleavage	1
		1	LOC_Os10g33960.2	Os10g0480200	miRNA 21 CCCCUUACUUCGGACCAGGCU 1 ::.:::::::::::::::. Target 696 CUGGGAUGAAGCCUGGUCCGG 716							cDNA|START domain containing protein, expressed	Cleavage	1
		1	LOC_Os03g01890.2	Os03g0109400	miRNA 21 CCCCUUACUUCGGACCAGGCU 1 ::.:::::::::::::::. Target 1089 CUGGGAUGAAGCCUGGUCCGG 1109							cDNA|START domain containing protein, expressed	Cleavage	1
		1	LOC_Os10g33960.4	Os10g0480200	miRNA 21 CCCCUUACUUCGGACCAGGCU 1 ::.:::::::::::::::. Target 924 CUGGGAUGAAGCCUGGUCCGG 944							cDNA|START domain containing protein, expressed	Cleavage	1
		1	LOC_Os10g33960.3	Os10g0480200	miRNA 21 CCCCUUACUUCGGACCAGGCU 1 ::.:::::::::::::::. Target 924 CUGGGAUGAAGCCUGGUCCGG 944							cDNA|START domain containing protein, expressed	Cleavage	1
		1.5	LOC_Os02g49670.1	Os02g0729300	miRNA 21 CCCCUUACUUCGGACCAGGCU 1 :::.: :::::::::::::: Target 2815 CGGGGAAGAAGCCUGGUCCGA 2835							cDNA|zinc knuckle family protein, expressed	Cleavage	1
		1.5	LOC_Os03g44835.1	Os03g0651201	miRNA 21 CCCCUUACUUCGGACCAGGCU 1 : ::::::::::::: ::::: Target 1245 GAGGAAUGAAGCCUGAUCCGA 1265							cDNA|expressed protein	Cleavage	1
		2	LOC_Os03g56920.1	Os03g0782100	miRNA 21 CCCCUUACUUCGGACCAGGCU 1 :::: :::::::::::.::. Target 1533 UGGGACUGAAGCCUGGUUCGG 1553							cDNA|expressed protein	Cleavage	1
		2	LOC_Os04g44380.1	Os04g0525400	miRNA 21 CCCCUUACUUCGGACCAGGCU 1 ::: :::::::::::.::. Target 255 UAGGACUGAAGCCUGGUUCGG 275							cDNA|expressed protein	Cleavage	1
		2.5	LOC_Os03g10290.1	Os03g0199900	miRNA 21 CCCCUUACUUCGGACCAGGCU 1 ::::::::::::::::::: Target 1041 GGGGAAUGAAGCCUGGUCCAU 1061							cDNA|expressed protein	Cleavage	1
		2.5	LOC_Os12g43900.1	Os12g0635850	miRNA 21 CCCCUUACUUCGGACCAGGCU 1 ::::::::::::: :::::: Target 1329 GGGGAAUGAAGCCCGGUCCGC 1349							cDNA|retrotransposon protein, putative, LINE subclass, expressed	Cleavage	1
				Os12g0635901
		2.5	LOC_Os01g33740.1	/	miRNA 21 CCCCUUACUUCGGACCAGGCU 1 :::: ::::::::::::::. Target 1554 GGGGCCUGAAGCCUGGUCCGG 1574							cDNA|retrotransposon protein, putative, unclassified, expressed	Cleavage	1
		2.5	LOC_Os03g35380.1	/	miRNA 21 CCCCUUACUUCGGACCAGGCU 1 ::::: ::::::::: :::: Target 2004 AGGGAAAGAAGCCUGGGCCGA 2024							cDNA|retrotransposon protein, putative, unclassified, expressed	Cleavage	1
osa-miR166k-3p	TCGGACCAGGCTTCAATCCCT	2	LOC_Os04g49300.1	Os04g0582500	miRNA 21 UCCCUAACUUCGGACCAGGCU 1 :::::: ::::::::::::: Target 333 AGGGAUGGAAGCCUGGUCCGU 353							cDNA|retrotransposon protein, putative, LINE subclass, expressed	Cleavage	1
osa-miR166l-3p
osa-miR166m	TCGGACCAGGCTTCATTCCCT
		2	LOC_Os03g56920.1	Os03g0782100	miRNA 21 UCCCUAACUUCGGACCAGGCU 1 :::: :::::::::::.::. Target 1533 UGGGACUGAAGCCUGGUUCGG 1553							cDNA|expressed protein	Cleavage	1
		2	LOC_Os01g50230.1	Os01g0697325	miRNA 21 UCCCUAACUUCGGACCAGGCU 1 :::::::::::::::.: : Target 1368 GAGGAUUGAAGCCUGGUUCCA 1388							cDNA|expressed protein	Cleavage	1
		2	LOC_Os04g50840.1	Os04g0594966	miRNA 21 UCCCUAACUUCGGACCAGGCU 1 :::::::::::::::.: : Target 1536 GAGGAUUGAAGCCUGGUUCCA 1556							cDNA|expressed protein	Cleavage	1
				Os04g0596100
		2	LOC_Os03g16320.1	Os03g0269800	miRNA 21 UCCCUAACUUCGGACCAGGCU 1 :::::::::::::::.: : Target 1536 GAGGAUUGAAGCCUGGUUCCA 1556							cDNA|expressed protein	Cleavage	1
		2	LOC_Os04g44380.1	Os04g0525400	miRNA 21 UCCCUAACUUCGGACCAGGCU 1 ::: :::::::::::.::. Target 255 UAGGACUGAAGCCUGGUUCGG 275							cDNA|expressed protein	Cleavage	1
		2	LOC_Os10g33960.3	Os10g0480200	miRNA 21 UCCCUAACUUCGGACCAGGCU 1 ::. ::::::::::::::. Target 924 CUGGGAUGAAGCCUGGUCCGG 944							cDNA|START domain containing protein, expressed	Cleavage	1
		2	LOC_Os10g33960.4	Os10g0480200	miRNA 21 UCCCUAACUUCGGACCAGGCU 1 ::. ::::::::::::::. Target 924 CUGGGAUGAAGCCUGGUCCGG 944							cDNA|START domain containing protein, expressed	Cleavage	1
		2	LOC_Os03g01890.2	Os03g0109400	miRNA 21 UCCCUAACUUCGGACCAGGCU 1 ::. ::::::::::::::. Target 1089 CUGGGAUGAAGCCUGGUCCGG 1109							cDNA|START domain containing protein, expressed	Cleavage	1
		2	LOC_Os10g33960.2	Os10g0480200	miRNA 21 UCCCUAACUUCGGACCAGGCU 1 ::. ::::::::::::::. Target 696 CUGGGAUGAAGCCUGGUCCGG 716							cDNA|START domain containing protein, expressed	Cleavage	1
		2	LOC_Os03g43930.2	Os03g0640800	miRNA 21 UCCCUAACUUCGGACCAGGCU 1 ::. ::::::::::::::. Target 955 UUGGGAUGAAGCCUGGUCCGG 975							cDNA|START domain containing protein, expressed	Cleavage	1
		2	LOC_Os03g43930.1	Os03g0640800	miRNA 21 UCCCUAACUUCGGACCAGGCU 1 ::. ::::::::::::::. Target 955 UUGGGAUGAAGCCUGGUCCGG 975							cDNA|START domain containing protein, expressed	Cleavage	1
		2	LOC_Os12g41860.1	Os12g0612700	miRNA 21 UCCCUAACUUCGGACCAGGCU 1 ::. ::::::::::::::. Target 877 UUGGGAUGAAGCCUGGUCCGG 897							cDNA|START domain containing protein, expressed	Cleavage	1
		2	LOC_Os10g33960.1	Os10g0480200	miRNA 21 UCCCUAACUUCGGACCAGGCU 1 ::. ::::::::::::::. Target 924 CUGGGAUGAAGCCUGGUCCGG 944							cDNA|START domain containing protein, expressed	Cleavage	1
		2	LOC_Os03g01890.1	Os03g0109400	miRNA 21 UCCCUAACUUCGGACCAGGCU 1 ::. ::::::::::::::. Target 1089 CUGGGAUGAAGCCUGGUCCGG 1109							cDNA|START domain containing protein, expressed	Cleavage	1
		2.5	LOC_Os11g45899.1	/	miRNA 21 UCCCUAACUUCGGACCAGGCU 1 .:::::::::::::::::: Target 192 GGGGAUUGAAGCCUGGUCCUC 212							cDNA|retrotransposon protein, putative, unclassified, expressed	Cleavage	1
		2.5	LOC_Os08g36660.1	Os08g0470500	miRNA 21 UCCCUAACUUCGGACCAGGCU 1 :::::::::::: :::::: Target 1332 UGGGAUUGAAGCCCGGUCCGC 1352							cDNA|expressed protein	Cleavage	1
				Os08g0470533
				Os08g0470540
		2.5	LOC_Os01g33740.1	/	miRNA 21 UCCCUAACUUCGGACCAGGCU 1 .::: ::::::::::::::. Target 1554 GGGGCCUGAAGCCUGGUCCGG 1574							cDNA|retrotransposon protein, putative, unclassified, expressed	Cleavage	1
		2.5	LOC_Os02g49670.1	Os02g0729300	miRNA 21 UCCCUAACUUCGGACCAGGCU 1 :::. :::::::::::::: Target 2815 CGGGGAAGAAGCCUGGUCCGA 2835							cDNA|zinc knuckle family protein, expressed	Cleavage	1
		2.5	LOC_Os03g44835.1	Os03g0651201	miRNA 21 UCCCUAACUUCGGACCAGGCU 1 ::: ::::::::: ::::: Target 1245 GAGGAAUGAAGCCUGAUCCGA 1265							cDNA|expressed protein	Cleavage	1
osa-miR166a-5p	GGAATGTTGTCTGGTTCAAGG	1.5	LOC_Os09g08440.1	Os09g0258700	miRNA 21 GGAACUUGGUCUGUUGUAAGG 1 ::::.::::::::::::: Target 1065 AGAUGAAUCAGACAACAUUCC 1085							cDNA|nodulin MtN3 family protein, putative, expressed	Cleavage	1
osa-miR166e-5p	GGAATGTTGTCTGGTTCAAGG
		1.5	LOC_Os12g24410.1	/	miRNA 21 GGAACUUGGUCUGUUGUAAGG 1 ::::.::::::::::::: Target 1884 AGAUGAAUCAGACAACAUUCC 1904							cDNA|expressed protein	Cleavage	1
		1.5	LOC_Os09g25520.1	/	miRNA 21 GGAACUUGGUCUGUUGUAAGG 1 ::::.::::::::::::: Target 1878 AGAUGAAUCAGACAACAUUCC 1898							cDNA|expressed protein	Cleavage	1
		1.5	LOC_Os06g36960.1	/	miRNA 21 GGAACUUGGUCUGUUGUAAGG 1 ::::.::::::::::::: Target 1812 AGAUGAAUCAGACAACAUUCC 1832							cDNA|expressed protein	Cleavage	1
		2	LOC_Os08g14940.1	Os08g0247600	miRNA 21 GGAACUUGGUCUGUUGUAAGG 1 :: ::::::.::::::::. Target 2415 UAUUAAACCAGGCAACAUUCU 2435							cDNA|receptor kinase, putative, expressed	Cleavage	1
		2.5	LOC_Os09g10960.1	Os09g0281900	miRNA 21 GGAACUUGGUCUGUUGUAAGG 1 ::::::::::::...::: Target 3403 UGUUGAACCAGACAGUGUUCA 3423							cDNA|SWP, putative, expressed	Cleavage	1
		2.5	LOC_Os09g06230.1	Os09g0237600	miRNA 21 GGAACUUGGUCUGUUGUAAGG 1 :: ::::::::::..:::. Target 837 GGUUAAACCAGACAAUGUUCU 857							cDNA|serine/threonine-protein kinase 16, putative, expressed	Cleavage	1
osa-miR396e-3p	ATGGTTCAAGAAAGCCCATGGAAA	2.5	/	Os03g0289850-01	miRNA 24 AAAGGUACCCGAAAGAACUUGGUA 1 .:::: .:::.:::::::.: Target 1157 CCAGUAUGGCUUUUUUUGAACCGU 1180							Hypothetical gene	Cleavage	1
		2.5	/	Os11g0481150-00	miRNA 24 AAAGGUACCCGAAAGAACUUGGUA 1 :: : :::::::::::::.:: Target 1817 ACUCAAGAGGCUUUCUUGAACUAU 1840							NB-ARC domain containing protein.	Cleavage	1
osa-miR396f-3p	ATAGTTCAAGAAAGTCCTTGGAAA	1.5	LOC_Os03g29340.1	Os03g0406900	miRNA 24 AAAGGUUCCUGAAAGAACUUGAUA 1 : :.:: :::::::::::::: Target 1808 ACACAAGGGUCUUUCUUGAACUAU 1831							cDNA|domain of unknown function domain containing protein, expressed	Cleavage	1
				Os03g0407050
		1.5	LOC_Os03g29340.2	Os03g0406900	miRNA 24 AAAGGUUCCUGAAAGAACUUGAUA 1 : :.:: :::::::::::::: Target 1844 ACACAAGGGUCUUUCUUGAACUAU 1867							cDNA|domain of unknown function domain containing protein, expressed	Cleavage	1
				Os03g0407050
		2.5	LOC_Os01g63610.1	/	miRNA 24 AAAGGUUCCUGAAAGAACUUGAUA 1 :::::::::.:::.: ::: Target 594 AAUGAAAGGACUUUUUUGGAAUAU 617							cDNA|retrotransposon protein, putative, unclassified, expressed	Cleavage	1
osa-miR396c-5p	TTCCACAGCTTTCTTGAACTT	1.5	LOC_Os01g32750.1	Os01g0510800	miRNA 21 UUCAAGUUCUUUCGACACCUU 1 .:::.::::.::::::::.: Target 579 CGGUUUAAGAGAGCUGUGGGA 599							cDNA|TATA binding protein-associated factor, putative, expressed	Cleavage	1
		2	LOC_Os04g57050.1	Os04g0666100	miRNA 21 UUCAAGUUCUUUCGACACCUU 1 .::::::::.:.:::::::: Target 853 GAGUUCAAGGAGGCUGUGGAC 873							cDNA|jasmonate O-methyltransferase, putative, expressed	Cleavage	1
		2.5	LOC_Os04g57070.1	Os04g0666233	miRNA 21 UUCAAGUUCUUUCGACACCUU 1 .::::::::.:.:.:::::: Target 598 GAGUUCAAGGAGGUUGUGGAC 618							cDNA|jasmonate O-methyltransferase, putative, expressed	Cleavage	1
		2.5	LOC_Os12g10180.1	/	miRNA 21 UUCAAGUUCUUUCGACACCUU 1 :.::: :.:.::::::::::. Target 460 AGGUUGAGGGAAGCUGUGGAG 480							cDNA|NBS-LRR type disease resistance protein Rps1-k-2, putative, expressed	Cleavage	1
		2.5	LOC_Os04g52040.3	Os04g0609900	miRNA 21 UUCAAGUUCUUUCGACACCUU 1 ::::::.:::::::::: Target 2854 UCCUUCAAGGAAGCUGUGGAU 2874							cDNA|TNP1, putative, expressed	Cleavage	1
		2.5	LOC_Os04g52040.1	Os04g0609900	miRNA 21 UUCAAGUUCUUUCGACACCUU 1 ::::::.:::::::::: Target 2906 UCCUUCAAGGAAGCUGUGGAU 2926							cDNA|TNP1, putative, expressed	Cleavage	1
		2.5	LOC_Os04g52040.4	Os04g0609900	miRNA 21 UUCAAGUUCUUUCGACACCUU 1 ::::::.:::::::::: Target 2854 UCCUUCAAGGAAGCUGUGGAU 2874							cDNA|TNP1, putative, expressed	Cleavage	1
		2.5	LOC_Os01g52640.3	Os01g0725800	miRNA 21 UUCAAGUUCUUUCGACACCUU 1 .:::::. .::::::::::: Target 2356 UGGUUCAGUGAAGCUGUGGAA 2376							cDNA|suppressor of phythchrome A, putative, expressed	Cleavage	1
		2.5	LOC_Os07g40820.1	Os07g0599201	miRNA 21 UUCAAGUUCUUUCGACACCUU 1 : ::::::::.:: ::::::. Target 955 AUGUUCAAGAGAGGUGUGGAG 975							cDNA|PPR repeat domain containing protein, putative, expressed	Cleavage	1
		2.5	LOC_Os01g08560.2	Os01g0180800	miRNA 21 UUCAAGUUCUUUCGACACCUU 1 .:::: ::::.::::::::: Target 1991 GAGUUGCAGAAGGCUGUGGAA 2011							cDNA|DnaK family protein, putative, expressed	Cleavage	1
		2.5	LOC_Os01g08560.1	Os01g0180800	miRNA 21 UUCAAGUUCUUUCGACACCUU 1 .:::: ::::.::::::::: Target 1995 GAGUUGCAGAAGGCUGUGGAA 2015							cDNA|DnaK family protein, putative, expressed	Cleavage	1
		2.5	LOC_Os09g34980.1	Os09g0521700	miRNA 21 UUCAAGUUCUUUCGACACCUU 1 :::.:::..::.:::::.: Target 780 UUGUUUAAGGGAGUUGUGGGA 800							cDNA|zinc knuckle family protein, expressed	Cleavage	1
		2.5	LOC_Os04g48240.1	/	miRNA 21 UUCAAGUUCUUUCGACACCUU 1 :::::::.:.:: :::::: Target 7 UUGUUCAAGGAGGCGGUGGAA 27							cDNA|retrotransposon protein, putative, unclassified, expressed	Cleavage	1
		2.5	LOC_Os08g40230.1	Os08g0513300	miRNA 21 UUCAAGUUCUUUCGACACCUU 1 : : :::::::.:::::::: Target 585 AUGAUCAAGAAGGCUGUGGAU 605							cDNA|expressed protein	Cleavage	1
		2.5	LOC_Os11g19810.1	Os11g0303500	miRNA 21 UUCAAGUUCUUUCGACACCUU 1 :: ::::::.:::::::: Target 1603 CUGUCCAAGAAGGCUGUGGAU 1623							cDNA|PWWP domain containing protein, expressed	Cleavage	1
		2.5	LOC_Os11g19810.2	Os11g0303500	miRNA 21 UUCAAGUUCUUUCGACACCUU 1 :: ::::::.:::::::: Target 1801 CUGUCCAAGAAGGCUGUGGAU 1821							cDNA|PWWP domain containing protein, expressed	Cleavage	1
		2.5	LOC_Os12g04070.1	/	miRNA 21 UUCAAGUUCUUUCGACACCUU 1 : ::: :.::::::::::: Target 52 GCGCUCAUGGAAGCUGUGGAA 72							cDNA|expressed protein	Cleavage	1
osa-miR396e-5p	TCCACAGGCTTTCTTGAACTG	0	LOC_Os02g45570.1	Os02g0678800	miRNA 21 GUCAAGUUCUUUCGGACACCU 1 : ::::::::::::::::::: Target 629 CCGUUCAAGAAAGCCUGUGGA 649							cDNA|growth regulating factor protein, putative, expressed	Cleavage	1
		0	LOC_Os02g45570.2	Os02g0678800	miRNA 21 GUCAAGUUCUUUCGGACACCU 1 : ::::::::::::::::::: Target 838 CCGUUCAAGAAAGCCUGUGGA 858							cDNA|growth regulating factor protein, putative, expressed	Cleavage	1
		0	LOC_Os06g10310.1	Os06g0204800	miRNA 21 GUCAAGUUCUUUCGGACACCU 1 : ::::::::::::::::::: Target 423 CCGUUCAAGAAAGCCUGUGGA 443							cDNA|growth regulating factor protein, putative, expressed	Cleavage	1
		0	LOC_Os06g02560.2	Os06g0116200	miRNA 21 GUCAAGUUCUUUCGGACACCU 1 : ::::::::::::::::::: Target 605 CCGUUCAAGAAAGCCUGUGGA 625							cDNA|growth-regulating factor, putative, expressed	Cleavage	1
		0	LOC_Os04g51190.3	Os04g0600900	miRNA 21 GUCAAGUUCUUUCGGACACCU 1 : ::::::::::::::::::: Target 535 CCGUUCAAGAAAGCCUGUGGA 555							cDNA|growth-regulating factor, putative, expressed	Cleavage	1
		0	LOC_Os04g51190.1	Os04g0600900	miRNA 21 GUCAAGUUCUUUCGGACACCU 1 : ::::::::::::::::::: Target 535 CCGUUCAAGAAAGCCUGUGGA 555							cDNA|growth-regulating factor, putative, expressed	Cleavage	1
		0	LOC_Os04g51190.2	Os04g0600900	miRNA 21 GUCAAGUUCUUUCGGACACCU 1 : ::::::::::::::::::: Target 535 CCGUUCAAGAAAGCCUGUGGA 555							cDNA|growth-regulating factor, putative, expressed	Cleavage	1
		0	LOC_Os02g47280.2	Os02g0701300	miRNA 21 GUCAAGUUCUUUCGGACACCU 1 : ::::::::::::::::::: Target 570 CCGUUCAAGAAAGCCUGUGGA 590							cDNA|growth-regulating factor, putative, expressed	Cleavage	1
		0	LOC_Os06g02560.3	Os06g0116200	miRNA 21 GUCAAGUUCUUUCGGACACCU 1 : ::::::::::::::::::: Target 625 CCGUUCAAGAAAGCCUGUGGA 645							cDNA|growth-regulating factor, putative, expressed	Cleavage	1
		0	LOC_Os06g02560.1	Os06g0116200	miRNA 21 GUCAAGUUCUUUCGGACACCU 1 : ::::::::::::::::::: Target 605 CCGUUCAAGAAAGCCUGUGGA 625							cDNA|growth-regulating factor, putative, expressed	Cleavage	1
		0	LOC_Os02g47280.1	Os02g0701300	miRNA 21 GUCAAGUUCUUUCGGACACCU 1 : ::::::::::::::::::: Target 667 CCGUUCAAGAAAGCCUGUGGA 687							cDNA|growth-regulating factor, putative, expressed	Cleavage	1
		0	LOC_Os02g53690.1	Os02g0776900	miRNA 21 GUCAAGUUCUUUCGGACACCU 1 : ::::::::::::::::::: Target 570 CCGUUCAAGAAAGCCUGUGGA 590							cDNA|growth regulating factor protein, putative, expressed	Cleavage	1
		0	LOC_Os03g47140.1	Os03g0674700	miRNA 21 GUCAAGUUCUUUCGGACACCU 1 : ::::::::::::::::::: Target 947 CCGUUCAAGAAAGCCUGUGGA 967							cDNA|growth regulating factor protein, putative, expressed	Cleavage	1
		1	LOC_Os04g24190.1	Os04g0307300	miRNA 21 GUCAAGUUCUUUCGGACACCU 1 :::::::::::::::::: Target 827 CCUUUCAAGAAAGCCUGUGGA 847							cDNA|growth-regulating factor 11, putative, expressed	Cleavage	1
		1.5	LOC_Os04g48510.1	Os04g0574500	miRNA 21 GUCAAGUUCUUUCGGACACCU 1 : :::::::::::::: :::: Target 858 CCGUUCAAGAAAGCCUAUGGA 878							cDNA|growth regulating factor protein, putative, expressed	Cleavage	1
		1.5	LOC_Os03g51970.1	Os03g0729500	miRNA 21 GUCAAGUUCUUUCGGACACCU 1 : :::::::::::: :::::: Target 419 CCGUUCAAGAAAGCAUGUGGA 439							cDNA|growth-regulating factor, putative, expressed	Cleavage	1
		1.5	LOC_Os12g29980.2	Os12g0484900	miRNA 21 GUCAAGUUCUUUCGGACACCU 1 : :::::::::::: :::::: Target 732 CCGUUCAAGAAAGCAUGUGGA 752							cDNA|growth regulating factor protein, putative, expressed	Cleavage	1
		1.5	LOC_Os12g29980.1	Os12g0484900	miRNA 21 GUCAAGUUCUUUCGGACACCU 1 : :::::::::::: :::::: Target 774 CCGUUCAAGAAAGCAUGUGGA 794							cDNA|growth regulating factor protein, putative, expressed	Cleavage	1
		1.5	LOC_Os11g35030.1	Os11g0551900	miRNA 21 GUCAAGUUCUUUCGGACACCU 1 :::::::::::: :::::: Target 869 UCGUUCAAGAAAGCAUGUGGA 889							cDNA|growth regulating factor protein, putative, expressed	Cleavage	1
		1.5	LOC_Os11g35030.2	Os11g0551900	miRNA 21 GUCAAGUUCUUUCGGACACCU 1 :::::::::::: :::::: Target 1556 UCGUUCAAGAAAGCAUGUGGA 1576							cDNA|growth regulating factor protein, putative, expressed	Cleavage	1
		2.5	LOC_Os01g69950.1	Os01g0924000	miRNA 21 GUCAAGUUCUUUCGGACACCU 1 ::.:::.::::.:::::: Target 1704 UUCUUUAAGGAAGCUUGUGGA 1724							cDNA|ribosomal protein L27, putative, expressed	Cleavage	1
				Os01g0924100
osa-miR396f-5p	TCTCCACAGGCTTTCTTGAACT	1.5	LOC_Os06g10310.1	Os06g0204800	miRNA 22 UCAAGUUCUUUCGGACACCUCU 1 ::::::::::::::::::: : Target 424 CGUUCAAGAAAGCCUGUGGAAA 445							cDNA|growth regulating factor protein, putative, expressed	Cleavage	1
		1.5	LOC_Os02g47280.2	Os02g0701300	miRNA 22 UCAAGUUCUUUCGGACACCUCU 1 ::::::::::::::::::: : Target 571 CGUUCAAGAAAGCCUGUGGAAA 592							cDNA|growth-regulating factor, putative, expressed	Cleavage	1
		1.5	LOC_Os02g47280.1	Os02g0701300	miRNA 22 UCAAGUUCUUUCGGACACCUCU 1 ::::::::::::::::::: : Target 668 CGUUCAAGAAAGCCUGUGGAAA 689							cDNA|growth-regulating factor, putative, expressed	Cleavage	1
		1.5	LOC_Os02g53690.1	Os02g0776900	miRNA 22 UCAAGUUCUUUCGGACACCUCU 1 ::::::::::::::::::: : Target 571 CGUUCAAGAAAGCCUGUGGAAA 592							cDNA|growth regulating factor protein, putative, expressed	Cleavage	1
		1.5	LOC_Os03g47140.1	Os03g0674700	miRNA 22 UCAAGUUCUUUCGGACACCUCU 1 ::::::::::::::::::: : Target 948 CGUUCAAGAAAGCCUGUGGAAA 969							cDNA|growth regulating factor protein, putative, expressed	Cleavage	1
		1.5	LOC_Os04g24190.1	Os04g0307300	miRNA 22 UCAAGUUCUUUCGGACACCUCU 1 :::::::::::::::::: : Target 828 CUUUCAAGAAAGCCUGUGGAAA 849							cDNA|growth-regulating factor 11, putative, expressed	Cleavage	1
		2.5	LOC_Os02g45570.1	Os02g0678800	miRNA 22 UCAAGUUCUUUCGGACACCUCU 1 ::::::::::::::::::: Target 630 CGUUCAAGAAAGCCUGUGGAAG 651							cDNA|growth regulating factor protein, putative, expressed	Cleavage	1
		2.5	LOC_Os02g45570.2	Os02g0678800	miRNA 22 UCAAGUUCUUUCGGACACCUCU 1 ::::::::::::::::::: Target 839 CGUUCAAGAAAGCCUGUGGAAG 860							cDNA|growth regulating factor protein, putative, expressed	Cleavage	1
		2.5	LOC_Os06g02560.2	Os06g0116200	miRNA 22 UCAAGUUCUUUCGGACACCUCU 1 ::::::::::::::::::: Target 606 CGUUCAAGAAAGCCUGUGGAAU 627							cDNA|growth-regulating factor, putative, expressed	Cleavage	1
		2.5	LOC_Os04g51190.3	Os04g0600900	miRNA 22 UCAAGUUCUUUCGGACACCUCU 1 ::::::::::::::::::: Target 536 CGUUCAAGAAAGCCUGUGGAAG 557							cDNA|growth-regulating factor, putative, expressed	Cleavage	1
		2.5	LOC_Os04g51190.1	Os04g0600900	miRNA 22 UCAAGUUCUUUCGGACACCUCU 1 ::::::::::::::::::: Target 536 CGUUCAAGAAAGCCUGUGGAAG 557							cDNA|growth-regulating factor, putative, expressed	Cleavage	1
		2.5	LOC_Os04g51190.2	Os04g0600900	miRNA 22 UCAAGUUCUUUCGGACACCUCU 1 ::::::::::::::::::: Target 536 CGUUCAAGAAAGCCUGUGGAAG 557							cDNA|growth-regulating factor, putative, expressed	Cleavage	1
		2.5	LOC_Os06g02560.3	Os06g0116200	miRNA 22 UCAAGUUCUUUCGGACACCUCU 1 ::::::::::::::::::: Target 626 CGUUCAAGAAAGCCUGUGGAAU 647							cDNA|growth-regulating factor, putative, expressed	Cleavage	1
		2.5	LOC_Os06g02560.1	Os06g0116200	miRNA 22 UCAAGUUCUUUCGGACACCUCU 1 ::::::::::::::::::: Target 606 CGUUCAAGAAAGCCUGUGGAAU 627							cDNA|growth-regulating factor, putative, expressed	Cleavage	1
		2.5	LOC_Os08g28410.1	Os08g0371608	miRNA 22 UCAAGUUCUUUCGGACACCUCU 1 ::::.::::.:::::.:: Target 28 GAGGCAAGGAAGCUUGUGGGGA 49							cDNA|retinal pigment epithelial membrane protein, expressed	Cleavage	1
osa-miR162a	TCGATAAACCTCTGCATCCAG	2	LOC_Os03g15230.1	Os03g0257600	miRNA 21 GACCUACGUCUCCAAAUAGCU 1 ::: ::::::::::.:.:: Target 727 GGGGAGGCAGAGGUUUGUUGA 747							cDNA|DUF292 domain containing protein, expressed	Cleavage	1
osa-miR169e	TAGCCAAGGATGACTTGCCGG	1.5	LOC_Os07g06470.2	Os07g0158500	miRNA 21 GGCCGUUCAGUAGGAACCGAU 1 .::::: ::::::::::::. Target 1214 GUGGCAAUUCAUCCUUGGCUG 1234							cDNA|nuclear transcription factor Y subunit, putative, expressed	Cleavage	1
		1.5	LOC_Os07g06470.1	Os07g0158500	miRNA 21 GGCCGUUCAGUAGGAACCGAU 1 .::::: ::::::::::::. Target 1425 GUGGCAAUUCAUCCUUGGCUG 1445							cDNA|nuclear transcription factor Y subunit, putative, expressed	Cleavage	1
		2	LOC_Os03g07880.3	Os03g0174900	miRNA 21 GGCCGUUCAGUAGGAACCGAU 1 .::::: :::::::::::: Target 756 AUGGCAAAUCAUCCUUGGCUU 776							cDNA|nuclear transcription factor Y subunit, putative, expressed	Cleavage	1
		2	LOC_Os03g07880.1	Os03g0174900	miRNA 21 GGCCGUUCAGUAGGAACCGAU 1 .::::: :::::::::::: Target 844 AUGGCAAAUCAUCCUUGGCUU 864							cDNA|nuclear transcription factor Y subunit, putative, expressed	Cleavage	1
		2	LOC_Os03g07880.2	Os03g0174900	miRNA 21 GGCCGUUCAGUAGGAACCGAU 1 .::::: :::::::::::: Target 993 AUGGCAAAUCAUCCUUGGCUU 1013							cDNA|nuclear transcription factor Y subunit, putative, expressed	Cleavage	1
		2	LOC_Os07g41720.1	Os07g0608200	miRNA 21 GGCCGUUCAGUAGGAACCGAU 1 .::::: :::::::::::: Target 1169 GUGGCAAUUCAUCCUUGGCUU 1189							cDNA|nuclear transcription factor Y subunit, putative, expressed	Cleavage	1
		2	LOC_Os07g41720.2	Os07g0608200	miRNA 21 GGCCGUUCAGUAGGAACCGAU 1 .::::: :::::::::::: Target 1302 GUGGCAAUUCAUCCUUGGCUU 1322							cDNA|nuclear transcription factor Y subunit, putative, expressed	Cleavage	1
		2	LOC_Os03g29760.3	Os03g0411100	miRNA 21 GGCCGUUCAGUAGGAACCGAU 1 .::::: :::::::::::: Target 1264 GUGGCAAUUCAUCCUUGGCUU 1284							cDNA|nuclear transcription factor Y subunit, putative, expressed	Cleavage	1
		2	LOC_Os03g29760.1	Os03g0411100	miRNA 21 GGCCGUUCAGUAGGAACCGAU 1 .::::: :::::::::::: Target 1284 GUGGCAAUUCAUCCUUGGCUU 1304							cDNA|nuclear transcription factor Y subunit, putative, expressed	Cleavage	1
		2	LOC_Os03g29760.2	Os03g0411100	miRNA 21 GGCCGUUCAGUAGGAACCGAU 1 .::::: :::::::::::: Target 1364 GUGGCAAUUCAUCCUUGGCUU 1384							cDNA|nuclear transcription factor Y subunit, putative, expressed	Cleavage	1
		2	LOC_Os02g53620.1	Os02g0776400	miRNA 21 GGCCGUUCAGUAGGAACCGAU 1 ::::: :::::::::::: Target 988 UAGGCAAUUCAUCCUUGGCUU 1008							cDNA|nuclear transcription factor Y subunit, putative, expressed	Cleavage	1
		2	LOC_Os12g42400.2	Os12g0618600	miRNA 21 GGCCGUUCAGUAGGAACCGAU 1 ::::: ::::.:::::::. Target 1202 UAGGCAACUCAUUCUUGGCUG 1222							cDNA|nuclear transcription factor Y subunit, putative, expressed	Cleavage	1
		2	LOC_Os12g42400.3	Os12g0618600	miRNA 21 GGCCGUUCAGUAGGAACCGAU 1 ::::: ::::.:::::::. Target 1247 UAGGCAACUCAUUCUUGGCUG 1267							cDNA|nuclear transcription factor Y subunit, putative, expressed	Cleavage	1
		2	LOC_Os12g42400.1	Os12g0618600	miRNA 21 GGCCGUUCAGUAGGAACCGAU 1 ::::: ::::.:::::::. Target 1256 UAGGCAACUCAUUCUUGGCUG 1276							cDNA|nuclear transcription factor Y subunit, putative, expressed	Cleavage	1
		2.5	LOC_Os02g19970.1	Os02g0302700	miRNA 21 GGCCGUUCAGUAGGAACCGAU 1 : :.:::::::.:::::.:: Target 1575 ACUGUAAGUCAUUCUUGGUUA 1595							cDNA|aminotransferase, classes I and II, domain containing protein, expressed	Cleavage	1
		2.5	LOC_Os02g19970.2	Os02g0302700	miRNA 21 GGCCGUUCAGUAGGAACCGAU 1 : :.:::::::.:::::.:: Target 1659 ACUGUAAGUCAUUCUUGGUUA 1679							cDNA|aminotransferase, classes I and II, domain containing protein, expressed	Cleavage	1
		2.5	LOC_Os10g20990.1	Os10g0350200	miRNA 21 GGCCGUUCAGUAGGAACCGAU 1 ..::.: :::::::::::.:. Target 1084 UUGGUACGUCAUCCUUGGUUG 1104							cDNA|ribosomal protein S12 containing protein, expressed	Cleavage	1
				Os10g0350400
				Os10g0350450
		2.5	LOC_Os03g48970.4	Os03g0696300	miRNA 21 GGCCGUUCAGUAGGAACCGAU 1 : ::::: ::::.::::::: Target 1228 CAGGCAAUUCAUUCUUGGCUU 1248							cDNA|nuclear transcription factor Y subunit, putative, expressed	Cleavage	1
		2.5	LOC_Os03g48970.1	Os03g0696300	miRNA 21 GGCCGUUCAGUAGGAACCGAU 1 : ::::: ::::.::::::: Target 1236 CAGGCAAUUCAUUCUUGGCUU 1256							cDNA|nuclear transcription factor Y subunit, putative, expressed	Cleavage	1
		2.5	LOC_Os03g48970.2	Os03g0696300	miRNA 21 GGCCGUUCAGUAGGAACCGAU 1 : ::::: ::::.::::::: Target 1765 CAGGCAAUUCAUUCUUGGCUU 1785							cDNA|nuclear transcription factor Y subunit, putative, expressed	Cleavage	1
		2.5	LOC_Os03g48970.3	Os03g0696300	miRNA 21 GGCCGUUCAGUAGGAACCGAU 1 : ::::: ::::.::::::: Target 1935 CAGGCAAUUCAUUCUUGGCUU 1955							cDNA|nuclear transcription factor Y subunit, putative, expressed	Cleavage	1
		2.5	LOC_Os03g44540.1	Os03g0647600	miRNA 21 GGCCGUUCAGUAGGAACCGAU 1 ::::: ::::.::::::: Target 1718 UAGGCAAAUCAUUCUUGGCUC 1738							cDNA|nuclear transcription factor Y subunit, putative, expressed	Cleavage	1
osa-miR395i	GTGAAGTGTTTGGGGGAACTC	1	LOC_Os03g09940.1	Os03g0195450	miRNA 21 CUCAAGGGGGUUUGUGAAGUG 1 :::::::::::::::::::: Target 318 GAGUUCCCCCAAACACUUCAG 338							cDNA|sulfate transporter, putative, expressed	Cleavage	1
osa-miR395h				Os03g0195500
osa-miR395p
osa-miR395y
osa-miR395k		1.5	LOC_Os03g53230.1	Os03g0743900	miRNA 21 CUCAAGGGGGUUUGUGAAGUG 1 :::::::.::::.:::::::. Target 595 GAGUUCCUCCAAGCACUUCAU 615							cDNA|bifunctional 3-phosphoadenosine 5-phosphosulfate synthetase, putative, expressed	Cleavage	1
osa-miR395d
osa-miR395n
osa-miR395j
osa-miR395g		2	LOC_Os03g09930.1	Os03g0195300	miRNA 21 CUCAAGGGGGUUUGUGAAGUG 1 :::::: ::::::::::::: Target 111 GAGUUCACCCAAACACUUCAG 131							cDNA|sulfate transporter, putative, expressed	Cleavage	1
osa-miR395q
osa-miR395e
osa-miR395l
osa-miR395r		2.5	LOC_Os03g19750.1	Os03g0311200	miRNA 21 CUCAAGGGGGUUUGUGAAGUG 1 : ::..::::::.::::::: Target 831 AAAUUUUCCCAAAUACUUCAC 851							cDNA|transposon protein, putative, unclassified, expressed	Cleavage	1
osa-miR395s				Os03g0311250
osa-miR395m
osa-miR395b
		2.5	LOC_Os11g44580.1	Os11g0668100	miRNA 21 CUCAAGGGGGUUUGUGAAGUG 1 .:: ::.::.::.::::::: Target 1170 UGGUGCCUCCGAAUACUUCAC 1190							cDNA|go35 NBS-LRR, putative, expressed	Cleavage	1
		2.5	LOC_Os10g42439.1	Os10g0575200	miRNA 21 CUCAAGGGGGUUUGUGAAGUG 1 ::::.. :::::::::::: Target 950 UUGUUCUUACAAACACUUCAC 970							cDNA|heat shock protein DnaJ, putative, expressed	Cleavage	1
		2.5	LOC_Os10g35870.1	Os10g0502600	miRNA 21 CUCAAGGGGGUUUGUGAAGUG 1 : : ::::::.:::::::: Target 652 AUGGUGCCCCAAGCACUUCAC 672							cDNA|cytochrome b5-like Heme/Steroid binding domain containing protein, expressed	Cleavage	1
osa-miR1870-3p	TTTAGGGCTAATTCAGCATGAACA	2	LOC_Os01g17050.1	Os01g0278000	miRNA 24 ACAAGUACGACUUAAUCGGGAUUU 1 .::::: ::::::..::::: Target 1000 AUGAUAUGCUUAAUUAGUUCUAAA 1023							cDNA|VQ domain containing protein, putative, expressed	Cleavage	1
		2.5	LOC_Os11g41490.1	/	miRNA 24 ACAAGUACGACUUAAUCGGGAUUU 1 : :::::::::::..::.: Target 1558 UUGCAACGCUGAAUUAGCUUUAGA 1581							cDNA|retrotransposon protein, putative, Ty3-gypsy subclass, expressed	Cleavage	1
		2.5	LOC_Os09g15250.1	/	miRNA 24 ACAAGUACGACUUAAUCGGGAUUU 1 ::: ::::::::::::.: Target 3387 AGAAGAUGGUGAAUUAGCCCUGAU 3410							cDNA|retrotransposon protein, putative, unclassified, expressed	Cleavage	1
osa-miR1846d-5p	TCCCACCGAGCAGCCGGATCTC		/	/
osa-miR1849	TATCGTATCCTAGGTTGGTTT	2.5	LOC_Os01g44110.1	Os01g0631700	miRNA 21 UUUGGUUGGAUCCUAUGCUAU 1 .:.::.:::.:::::.:::. Target 2145 UGAUCAGCCUGGGAUAUGAUG 2165							cDNA|serine/threonine-protein kinase, putative, expressed	Cleavage	1
		2.5	LOC_Os03g60200.1	Os03g0816600	miRNA 21 UUUGGUUGGAUCCUAUGCUAU 1 ::::::::::::: .:::. Target 629 UCACCAACCUAGGAUUUGAUG 649							cDNA|pentatricopeptide, putative, expressed	Cleavage	1
osa-miR1856	TATGCGTAAGACGGATTCGTA	2.5	LOC_Os09g10274.1	Os09g0274900	miRNA 21 AUGCUUAGGCAGAAUGCGUAU 1 : :::::.::.::::::::. Target 645 AAAGAAUCUGUUUUACGCAUG 665							cDNA|expressed protein	Cleavage	1
osa-miR1863a	AGCTCTGATACCATGTTAGATTAG	1	LOC_Os05g13804.1	/	miRNA 24 GAUUAGAUUGUACCAUAGUCUCGA 1 :::::::::::::::::::: Target 35 ACUAUCUAACAUGGUAUCAGAGCG 58							cDNA|expressed protein	Cleavage	1
		1.5	LOC_Os06g38480.2	/	miRNA 24 GAUUAGAUUGUACCAUAGUCUCGA 1 : .: :::::::::::::::: Target 14 CACAAUUCACAUGGUAUCAGAGCU 37							cDNA|retrotransposon protein, putative, unclassified, expressed	Cleavage	1
		1.5	LOC_Os06g38480.1	/	miRNA 24 GAUUAGAUUGUACCAUAGUCUCGA 1 : .: :::::::::::::::: Target 14 CACAAUUCACAUGGUAUCAGAGCU 37							cDNA|retrotransposon protein, putative, unclassified, expressed	Cleavage	1
		2	LOC_Os10g37090.1	/	miRNA 24 GAUUAGAUUGUACCAUAGUCUCGA 1 ::: :::::::::::::::: Target 37 ACUAUCCAACAUGGUAUCAGAGCG 60							cDNA|expressed protein	Cleavage	1
		2	LOC_Os04g28234.1	Os04g0350000	miRNA 24 GAUUAGAUUGUACCAUAGUCUCGA 1 ::::::::::::::::: Target 3082 UGUUCAUAACAUGGUAUCAGAGCA 3105							cDNA|Rf1, mitochondrial precursor, putative, expressed	Cleavage	1
		2	LOC_Os05g02350.1	Os05g0114100	miRNA 24 GAUUAGAUUGUACCAUAGUCUCGA 1 : .: . :.::::::::::::::: Target 582 CAGACUCAGCAUGGUAUCAGAGCU 605							cDNA|endonuclease/exonuclease/phosphatase family domain containing protein, expressed	Cleavage	1
		2	LOC_Os02g34760.1	Os02g0552700	miRNA 24 GAUUAGAUUGUACCAUAGUCUCGA 1 : : ::: :::::::::::::: Target 39 UCACUGUAAGAUGGUAUCAGAGCU 62							cDNA|retrotransposon protein, putative, unclassified, expressed	Cleavage	1
		2	LOC_Os05g50070.1	/	miRNA 24 GAUUAGAUUGUACCAUAGUCUCGA 1 .:.: :::::::::::::: Target 791 CCACAUUGAAAUGGUAUCAGAGCU 814							cDNA|retrotransposon protein, putative, unclassified, expressed	Cleavage	1
		2.5	LOC_Os05g48030.1	Os05g0553800	miRNA 24 GAUU--AGAUUGUACCAUAGUCUCGA 1 :::: : :.::::::::::::::: Target 1229 CUAAAUUGUGACAUGGUAUCAGAGCA 1254							cDNA|anti-silencing protein, ASF1-like domain containing protein, expressed	Cleavage	1
		2.5	LOC_Os01g43340.1	Os01g0621500	miRNA 24 GAUUAGAUUGUACCAUAGUCUCGA 1 .:.: ::::::::::::::: Target 464 UCCGUUUUACAUGGUAUCAGAGCC 487							cDNA|retrotransposon protein, putative, unclassified, expressed	Cleavage	1
		2.5	LOC_Os05g15350.1	Os05g0243100	miRNA 24 GAUUAGAUUGUACCAUAGUCUCGA 1 : :.:::::::::::::: Target 794 UUCGCAUCAUAUGGUAUCAGAGCU 817							cDNA|expressed protein	Cleavage	1
		2.5	LOC_Os01g03230.1	/	miRNA 24 GAUUAGAUUGUACCAUAGUCUCGA 1 .: ::::::::::::::: Target 46 CACGCUUCACAUGGUAUCAGAGCC 69							cDNA|retrotransposon protein, putative, unclassified, expressed	Cleavage	1
osa-miR1863b.2	AGAGACTTGGCTGATGCATTACT	2.5	LOC_Os05g19270.1	Os05g0274200	miRNA 23 UCAUUACGUAGUCGGUUCAGAGA 1 ..::::::.: ::::::::: Target 2387 AAAGGUGCAUCGGACAAGUCUCU 2409							cDNA|MSH-like DNA mismatch repair protein, putative, expressed	Translation	1
		2.5	LOC_Os07g46670.3	Os07g0661400	miRNA 23 UCAUUACGUAGUCGGUUCAGAGA 1 :.:: :: :::.::::::::: Target 1633 GUUGAUUCAGCAGUCAAGUCUCU 1655							cDNA|early response to dehydration 15, putative, expressed	Cleavage	1
		2.5	LOC_Os07g46670.2	Os07g0661400	miRNA 23 UCAUUACGUAGUCGGUUCAGAGA 1 :.:: :: :::.::::::::: Target 1630 GUUGAUUCAGCAGUCAAGUCUCU 1652							cDNA|early response to dehydration 15, putative, expressed	Cleavage	1
		2.5	LOC_Os08g17610.1	Os08g0278100	miRNA 23 UCAUUACGUAGUCGGUUCAGAGA 1 :::::::::...:::.:.: Target 815 CUGUAUGCAUCAGUUGAGUUUUU 837							cDNA|expressed protein	Cleavage	1
osa-miR2864.1	TTTTGCTGCCCTTGTTTTGCA	2	LOC_Os09g07154.1	Os09g0246300	miRNA 21 ACGUUUUGUUCCCGUCGUUUU 1 :::::::::::: ::::::.: Target 267 UGCAAAACAAGGACAGCAAGA 287							cDNA|expressed protein	Cleavage	1
		2	LOC_Os03g55040.1	Os03g0757500	miRNA 21 ACGUUUUGUUCCCGUCGUUUU 1 :::..:.:::::::::::. Target 1616 AUCAAGGCGAGGGCAGCAAAG 1636							cDNA|UDP-glucoronosyl and UDP-glucosyl transferase domain containing protein, expressed	Cleavage	1
		2.5	LOC_Os03g64290.1	Os03g0860700	miRNA 21 ACGUUUUGUUCCCGUCGUUUU 1 ::.::::::::::: ::::.: Target 3997 UGUAAAACAAGGGCUGCAAGA 4017							cDNA|myosin, putative, expressed	Cleavage	1
				Os03g0860801
		2.5	LOC_Os11g06540.1	/	miRNA 21 ACGUUUUGUUCCCGUCGUUUU 1 :::.:.::.:::::.::.::: Target 7 UGCGAGACGAGGGCGGCGAAA 27							cDNA|expressed protein	Cleavage	1
		2.5	LOC_Os02g50040.1	Os02g0733300	miRNA 21 ACGUUUUGUUCCCGUCGUUUU 1 :::.:.:::: ::::::::: Target 74 AGCAGAGCAAGAGCAGCAAAA 94							cDNA|endoglucanase, putative, expressed	Translation	1
		2.5	LOC_Os06g18820.2	Os06g0291500	miRNA 21 ACGUUUUGUUCCCGUCGUUUU 1 : ::.::::::::.::...:: Target 1365 UUCAGAACAAGGGUAGUGGAA 1385							cDNA|serine threonine kinase, putative, expressed	Cleavage	1
		2.5	LOC_Os02g05930.1	Os02g0153400	miRNA 21 ACGUUUUGUUCCCGUCGUUUU 1 ::::::::::: .:.:::: Target 2772 CACAAAACAAGGGAGGUAAAA 2792							cDNA|phytosulfokine receptor precursor, putative, expressed	Cleavage	1
		2.5	LOC_Os03g55130.2	Os03g0758600	miRNA 21 ACGUUUUGUUCCCGUCGUUUU 1 ::::::.::: :::::::. Target 1755 GCCAAAACGAGGCCAGCAAAG 1775							cDNA|expressed protein	Cleavage	1
		2.5	LOC_Os01g72210.2	Os01g0950900	miRNA 21 ACGUUUUGUUCCCGUCGUUUU 1 : ::. :::::::::::::: Target 2650 UUCAGUCCAAGGGCAGCAAAA 2670							cDNA|early-responsive to dehydration protein-related, putative, expressed	Cleavage	1
		2.5	LOC_Os01g72210.1	Os01g0950900	miRNA 21 ACGUUUUGUUCCCGUCGUUUU 1 : ::. :::::::::::::: Target 2643 UUCAGUCCAAGGGCAGCAAAA 2663							cDNA|early-responsive to dehydration protein-related, putative, expressed	Cleavage	1
osa-miR2871a-5p	GACCGTAGAAACTAGCATAGAAAA	2.5	LOC_Os10g02930.2	Os10g0118900	miRNA 24 AAAAGAUACGAUCAAAGAUGCCAG 1 :::::.:::::::.:::. Target 1320 GCCUGGAUGCUGGUUUCUAUGGUU 1343							cDNA|helicase SEN1, putative, expressed	Cleavage	1
osa-miR2874	ATGTGAACAGTGTCAAACAGTGTC	1.5	LOC_Os01g21450.1	Os01g0316900	miRNA 24 CUGUGACAAACUGUGACAAGUGUA 1 :::::::.::::::::..: Target 2303 UGUCGUGUUUGAUACUGUUCAUGU 2326							cDNA|expressed protein	Cleavage	1
		1.5	LOC_Os01g21450.2	Os01g0316900	miRNA 24 CUGUGACAAACUGUGACAAGUGUA 1 :::::::.::::::::..: Target 3053 UGUCGUGUUUGAUACUGUUCAUGU 3076							cDNA|expressed protein	Cleavage	1
		1.5	LOC_Os01g21450.3	Os01g0316900	miRNA 24 CUGUGACAAACUGUGACAAGUGUA 1 :::::::.::::::::..: Target 3345 UGUCGUGUUUGAUACUGUUCAUGU 3368							cDNA|expressed protein	Cleavage	1
		2.5	LOC_Os04g02720.1	Os04g0117500	miRNA 24 CUGUGACAAACUGUGACAAGUGUA 1 : :::: ::::::::::..:.: Target 395 UCCUCUGUGUGACACUGUUUGCGU 418							cDNA|potassium channel KAT2, putative, expressed	Cleavage	1
		2.5	LOC_Os07g07260.1	Os07g0167100	miRNA 24 CUGUGACAAACUGUGACAAGUGUA 1 .: ::: ::::::::.:::: Target 1411 ACGUUUAUUUUACACUGUUUACAU 1434							cDNA|glutamine-dependent NAD, putative, expressed	Cleavage	1
		2.5	LOC_Os07g07260.2	Os07g0167100	miRNA 24 CUGUGACAAACUGUGACAAGUGUA 1 .: ::: ::::::::.:::: Target 1411 ACGUUUAUUUUACACUGUUUACAU 1434							cDNA|glutamine-dependent NAD, putative, expressed	Cleavage	1
osa-miR2878-3p	CAGGATTTTATACATGTAAAGAAT	2	LOC_Os04g49420.1	Os04g0583550	miRNA 24 UAAGAAAUGUACAUAUUUUAGGAC 1 : :::::::::::::.::.: Target 911 UCACAUUACAUGUAUAAAGUCUUA 934							cDNA|Core histone H2A/H2B/H3/H4 domain containing protein, putative, expressed	Cleavage	1
				Os04g0583600
		2.5	LOC_Os04g04410.1	Os04g0133200	miRNA 24 UAAGAAAUGUACAUAUUUUAGGAC 1 :::.::::::.:::::.: Target 517 AAGGCUUAUAUGUAUGAAAUCUUC 540							cDNA|expressed protein	Cleavage	1
osa-miR2905	TACATGTCAGTGACAAAGGCA	0.5	LOC_Os09g23725.1	Os09g0402001	miRNA 21 ACGGAAACAGUGACUGUACAU 1 : ::::::::::::::::::. Target 1355 UACCUUUGUCACUGACAUGUG 1375							cDNA|expressed protein	Cleavage	1
		1	LOC_Os06g39840.1	Os06g0599700	miRNA 21 ACGGAAACAGUGACUGUACAU 1 :::.::::::::::::::::. Target 4245 UGCUUUUGUCACUGACAUGUG 4265							cDNA|retrotransposon protein, putative, unclassified, expressed	Cleavage	1
		1.5	LOC_Os08g30780.1	Os08g0398350	miRNA 21 ACGGAAACAGUGACUGUACAU 1 :: :::::::::::::::::. Target 1899 UGACUUUGUCACUGACAUGUG 1919							cDNA|ABC transporter, ATP-binding protein, putative, expressed	Cleavage	1
		1.5	LOC_Os01g14100.3	Os01g0243200	miRNA 21 ACGGAAACAGUGACUGUACAU 1 : :::::::::::::::::. Target 1556 GGACUUUGUCACUGACAUGUG 1576							cDNA|BT1 family protein, putative, expressed	Cleavage	1
		1.5	LOC_Os02g50470.1	Os02g0738300	miRNA 21 ACGGAAACAGUGACUGUACAU 1 ..::::::.:::::::::: Target 1072 AUUUUUUGUCGCUGACAUGUA 1092							cDNA|expressed protein	Cleavage	1
		2	LOC_Os08g33710.1	Os08g0434100	miRNA 21 ACGGAAACAGUGACUGUACAU 1 ::::::::::::::: ::. Target 1084 GUCCUUUGUCACUGACACGUG 1104							cDNA|ribonuclease T2 family domain containing protein, expressed	Cleavage	1
		2	LOC_Os10g33484.1	/	miRNA 21 ACGGAAACAGUGACUGUACAU 1 : ::::: :::.:::.::::: Target 432 UACCUUUAUCAUUGAUAUGUA 452							cDNA|hypothetical protein	Cleavage	1
		2.5	LOC_Os05g40170.1	Os05g0479900	miRNA 21 ACGGAAACAGUGACUGUACAU 1 :::::::::::.: ::::::. Target 1359 UGCCUUUGUCAUUAACAUGUG 1379							cDNA|expressed protein	Cleavage	1
		2.5	LOC_Os06g12820.1	Os06g0234600	miRNA 21 ACGGAAACAGUGACUGUACAU 1 :::::::::: ::::::: Target 1628 UAACUUUGUCACUUACAUGUA 1648							cDNA| proteins of unknown function domain containing protein, expressed	Cleavage	1
		2.5	LOC_Os02g55300.1	Os02g0796300	miRNA 21 ACGGAAACAGUGACUGUACAU 1 .:::::::.:::.::::: Target 1352 CUGUUUUGUCAUUGAUAUGUA 1372							cDNA|CAF1 family ribonuclease containing protein, putative, expressed	Cleavage	1
		2.5	LOC_Os01g09450.1	Os01g0190300	miRNA 21 ACGGAAACAGUGACUGUACAU 1 :::::::::.::::: ::. Target 1428 GUCCUUUGUCAUUGACAGGUG 1448							cDNA|OsIAA2 - Auxin-responsive Aux/IAA gene family member, expressed	Cleavage	1
		2.5	LOC_Os01g09450.2	Os01g0190300	miRNA 21 ACGGAAACAGUGACUGUACAU 1 :::::::::.::::: ::. Target 1500 GUCCUUUGUCAUUGACAGGUG 1520							cDNA|OsIAA2 - Auxin-responsive Aux/IAA gene family member, expressed	Cleavage	1
		2.5	LOC_Os10g35500.1	Os10g0498100	miRNA 21 ACGGAAACAGUGACUGUACAU 1 :: ::: ::::::::::::. Target 1343 CGCGUUUAUCACUGACAUGUG 1363							cDNA|epoxide hydrolase, putative, expressed	Cleavage	1
		2.5	LOC_Os10g35500.2	Os10g0498100	miRNA 21 ACGGAAACAGUGACUGUACAU 1 :: ::: ::::::::::::. Target 1981 CGCGUUUAUCACUGACAUGUG 2001							cDNA|epoxide hydrolase, putative, expressed	Cleavage	1
		2.5	LOC_Os06g49970.2	Os06g0713800	miRNA 21 ACGGAAACAGUGACUGUACAU 1 : :.:: ::::::::.::::. Target 1736 UACUUUCGUCACUGAUAUGUG 1756							cDNA|alpha-amylase precursor, putative, expressed	Cleavage	1
osa-miR5542	TTTGAGAAGGTATCATGAGAT	1.5	LOC_Os06g20879.2	Os06g0314300	miRNA 21 UAGAGUACUAUGGAAGAGUUU 1 ::::::: .:::::::::::: Target 1355 AUCUCAUAGUACCUUCUCAAA 1375							cDNA|expressed protein	Cleavage	1
		1.5	LOC_Os06g20879.1	Os06g0314300	miRNA 21 UAGAGUACUAUGGAAGAGUUU 1 ::::::: .:::::::::::: Target 1355 AUCUCAUAGUACCUUCUCAAA 1375							cDNA|expressed protein	Cleavage	1
		1.5	LOC_Os12g03720.2	Os12g0131100	miRNA 21 UAGAGUACUAUGGAAGAGUUU 1 : ::::::::::: ::::::: Target 971 ACCUCAUGAUACCAUCUCAAA 991							cDNA|glucosamine--fructose-6-phosphate aminotransferase 1, putative, expressed	Cleavage	1
				Os12g0131150
		2	LOC_Os03g45410.1	Os03g0657000	miRNA 21 UAGAGUACUAUGGAAGAGUUU 1 :::::::.:.:.:::::::. Target 459 UUCUCAUGGUGCUUUCUCAAG 479							cDNA|TATA-binding protein, putative, expressed	Cleavage	1
		2	LOC_Os12g39070.1	Os12g0580300	miRNA 21 UAGAGUACUAUGGAAGAGUUU 1 :::::::.:.:.:::::::. Target 579 UUCUCAUGGUGCUUUCUCAAG 599							cDNA|TATA-binding protein, putative, expressed	Cleavage	1
		2	LOC_Os05g35130.1	/	miRNA 21 UAGAGUACUAUGGAAGAGUUU 1 : ::::::.::::: :::::: Target 79 ACCUCAUGGUACCUACUCAAA 99							cDNA|retrotransposon protein, putative, unclassified	Cleavage	1
		2	LOC_Os04g31390.1	Os04g0382700	miRNA 21 UAGAGUACUAUGGAAGAGUUU 1 ::.::::::::::::: :: Target 1881 UGCUUAUGAUACCUUCUCCAA 1901							cDNA|vacuolar protein sorting-associated protein 11, putative, expressed	Cleavage	1
		2.5	LOC_Os01g66760.1	Os01g0891700	miRNA 21 UAGAGUACUAUGGAAGAGUUU 1 ::::::::.::::: :::::. Target 1352 AUCUCAUGGUACCUCCUCAAG 1372							cDNA|inactive receptor kinase At2g26730 precursor, putative, expressed	Cleavage	1
		2.5	LOC_Os09g32220.1	Os09g0497400	miRNA 21 UAGAGUACUAUGGAAGAGUUU 1 .:::::.:::.::::::: Target 691 CGUUCAUGGUACUUUCUCAAU 711							cDNA|pob, putative, expressed	Cleavage	1
		2.5	LOC_Os03g42230.1	Os03g0619600	miRNA 21 UAGAGUACUAUGGAAGAGUUU 1 : ::::::.::::: :::::. Target 645 ACCUCAUGGUACCUCCUCAAG 665							cDNA|B3 DNA binding domain containing protein, expressed	Cleavage	1
		2.5	LOC_Os09g03750.1	Os09g0124800	miRNA 21 UAGAGUACUAUGGAAGAGUUU 1 ::..::::.::::.:::.: Target 1241 UGCUUGUGAUGCCUUUUCAGA 1261							cDNA|ankyrin, putative, expressed	Cleavage	1
		2.5	LOC_Os05g15150.1	Os05g0241100	miRNA 21 UAGAGUACUAUGGAAGAGUUU 1 : ::::::.::::: :::::. Target 1553 ACCUCAUGGUACCUCCUCAAG 1573							cDNA|leucyl-tRNA synthetase, cytoplasmic, putative, expressed	Cleavage	1
osa-miR5788	TGGATGTGACATACTCTAGTA	1	LOC_Os12g02330.2	Os12g0115300	miRNA 21 AUGAUCUCAUACAGUGUAGGU 1 ::::::: ::::::::::::: Target 888 UACUAGAAUAUGUCACAUCCA 908							cDNA|LTPL13 - Protease inhibitor/seed storage/LTP family protein precursor, expressed	Cleavage	1
		1	LOC_Os11g02400.1	Os11g0116000	miRNA 21 AUGAUCUCAUACAGUGUAGGU 1 ::::::: ::::::::::::: Target 932 UACUAGAAUAUGUCACAUCCA 952							cDNA|LTPL8 - Protease inhibitor/seed storage/LTP family protein precursor, expressed	Cleavage	1
		1	LOC_Os11g02400.2	Os11g0116000	miRNA 21 AUGAUCUCAUACAGUGUAGGU 1 ::::::: ::::::::::::: Target 1030 UACUAGAAUAUGUCACAUCCA 1050							cDNA|LTPL8 - Protease inhibitor/seed storage/LTP family protein precursor, expressed	Cleavage	1
		1.5	LOC_Os03g19480.1	Os03g0307800	miRNA 21 AUGAUCUCAUACAGUGUAGGU 1 ::::::: :::::::::::.: Target 3192 UACUAGAAUAUGUCACAUCUA 3212							cDNA|SET domain containing protein, expressed	Cleavage	1
		2	LOC_Os05g45820.1	Os05g0534500	miRNA 21 AUGAUCUCAUACAGUGUAGGU 1 ::::::: :::::.::::::. Target 1264 UACUAGAAUAUGUUACAUCCG 1284							cDNA|heavy metal-associated domain containing protein, expressed	Cleavage	1
		2	LOC_Os01g44140.1	Os01g0632000	miRNA 21 AUGAUCUCAUACAGUGUAGGU 1 ::::::: :::::::.:::.: Target 27 UACUAGAAUAUGUCAUAUCUA 47							cDNA|expressed protein	Cleavage	1
		2	LOC_Os06g06490.3	Os06g0159900	miRNA 21 AUGAUCUCAUACAGUGUAGGU 1 :.::::: :::::::.:::.: Target 903 UGCUAGAAUAUGUCAUAUCUA 923							cDNA|U-box domain containing heat shock protein, putative, expressed	Cleavage	1
		2	LOC_Os04g43350.1	Os04g0513000	miRNA 21 AUGAUCUCAUACAGUGUAGGU 1 : ::::. ::::::::::::. Target 1022 UUCUAGGAUAUGUCACAUCCG 1042							cDNA|expressed protein	Cleavage	1
		2.5	LOC_Os01g51800.1	Os01g0715800	miRNA 21 AUGAUCUCAUACAGUGUAGGU 1 ::::::: ::::::: ::::: Target 1028 UACUAGAAUAUGUCAAAUCCA 1048							cDNA|expressed protein	Cleavage	1
		2.5	LOC_Os04g32540.2	Os04g0396800	miRNA 21 AUGAUCUCAUACAGUGUAGGU 1 ::::::: ::::::::::: : Target 1543 UACUAGAAUAUGUCACAUCGA 1563							cDNA|OsSCP24 - Putative Serine Carboxypeptidase homologue, expressed	Cleavage	1
		2.5	LOC_Os04g32540.1	Os04g0396800	miRNA 21 AUGAUCUCAUACAGUGUAGGU 1 ::::::: ::::::::::: : Target 1817 UACUAGAAUAUGUCACAUCGA 1837							cDNA|OsSCP24 - Putative Serine Carboxypeptidase homologue, expressed	Cleavage	1
		2.5	LOC_Os12g44010.1	Os12g0636900	miRNA 21 AUGAUCUCAUACAGUGUAGGU 1 ::.:::: ::::::.:::::. Target 1685 UAUUAGAAUAUGUCGCAUCCG 1705							cDNA|purple acid phosphatase precursor, putative, expressed	Cleavage	1
				Os12g0637000
		2.5	LOC_Os03g07430.3	Os03g0170400	miRNA 21 AUGAUCUCAUACAGUGUAGGU 1 ::.:::. ::::::::::.:: Target 2384 UAUUAGGAUAUGUCACAUUCA 2404							cDNA|protein kinase domain containing protein, expressed	Cleavage	1
		2.5	LOC_Os03g07430.5	Os03g0170400	miRNA 21 AUGAUCUCAUACAGUGUAGGU 1 ::.:::. ::::::::::.:: Target 2411 UAUUAGGAUAUGUCACAUUCA 2431							cDNA|protein kinase domain containing protein, expressed	Cleavage	1
		2.5	LOC_Os03g07430.2	Os03g0170400	miRNA 21 AUGAUCUCAUACAGUGUAGGU 1 ::.:::. ::::::::::.:: Target 2487 UAUUAGGAUAUGUCACAUUCA 2507							cDNA|protein kinase domain containing protein, expressed	Cleavage	1
		2.5	LOC_Os03g07430.1	Os03g0170400	miRNA 21 AUGAUCUCAUACAGUGUAGGU 1 ::.:::. ::::::::::.:: Target 2490 UAUUAGGAUAUGUCACAUUCA 2510							cDNA|protein kinase domain containing protein, expressed	Cleavage	1
		2.5	LOC_Os01g36350.3	Os01g0544200	miRNA 21 AUGAUCUCAUACAGUGUAGGU 1 ::.:::. :::::::.::::: Target 1357 UAUUAGGAUAUGUCAUAUCCA 1377							cDNA|cytochrome P450, putative, expressed	Cleavage	1
		2.5	LOC_Os03g07430.4	Os03g0170400	miRNA 21 AUGAUCUCAUACAGUGUAGGU 1 ::.:::. ::::::::::.:: Target 3235 UAUUAGGAUAUGUCACAUUCA 3255							cDNA|protein kinase domain containing protein, expressed	Cleavage	1
		2.5	LOC_Os05g39540.1	Os05g0472400	miRNA 21 AUGAUCUCAUACAGUGUAGGU 1 :::::: ::::::::.:::: Target 1505 UACUAGCAUAUGUCACGUCCA 1525							cDNA|metal cation transporter, putative, expressed	Cleavage	1
		2.5	LOC_Os09g22505.1	Os09g0392666	miRNA 21 AUGAUCUCAUACAGUGUAGGU 1 :::: : :::::::.::::: Target 963 CACUAUAAUAUGUCAUAUCCA 983							cDNA|expressed protein	Cleavage	1
osa-miR7694-5p	AACCTAGTACTGGATTAGTCACCA	2.5	LOC_Os03g27420.1	Os03g0392000	miRNA 24 ACCACUGAUUAGGUCAUGAUCCAA 1 :::: ::::::::::::: :: Target 953 AUAUGACCAAUCCAGUACUAGAUU 976							cDNA|retrotransposon protein, putative, unclassified, expressed	Cleavage	1
		2.5	LOC_Os09g11850.1	Os09g0290500	miRNA 24 ACCACUGAUUAGGUCAUGAUCCAA 1 :: ::::::.:::::::.:: : Target 637 AGGCCACUAAUUCAGUACUGGGAU 660							cDNA|ulp1 protease family, C-terminal catalytic domain containing protein, expressed	Cleavage	1
		2.5	LOC_Os04g25120.1	Os04g0317000	miRNA 24 ACCACUGAUUAGGUCAUGAUCCAA 1 :: ::::::.:::::::.:: : Target 796 AGGCCACUAAUUCAGUACUGGGAU 819							cDNA|expressed protein	Cleavage	1
osa-miR810b.1	TGAACACCGATATGCGTCATC	2.5	LOC_Os04g43740.1	Os04g0517900	miRNA 21 CUACUGCGUAUAGCCACAAGU 1 : :::.::::.::: :::::: Target 456 GCUGAUGCAUGUCGUUGUUCA 476							cDNA|OsSAUR18 - Auxin-responsive SAUR gene family member, expressed	Cleavage	1
osa-miR812r	ACGTTAGACACGAATTTCTACGGC	1.5	LOC_Os11g09260.1	Os11g0199000	miRNA 24 CGGCAUCUUUAAGCACAGAUUGCA 1 ::: :.:: ::::::::::::::: Target 883 GCCAUGGAUAUUCGUGUCUAACGU 906							cDNA|expressed protein	Cleavage	1
osa-miR827	TTAGATGACCATCAGCAAACA	0.5	LOC_Os02g45520.1	Os02g0678200	miRNA 21 ACAAACGACUACCAGUAGAUU 1 ::::.:::::::::::::: Target 395 GAUUUGUUGAUGGUCAUCUAA 415							cDNA|uncharacterized membrane protein, putative, expressed	Cleavage	1
		1.5	LOC_Os04g48390.1	Os04g0573000	miRNA 21 ACAAACGACUACCAGUAGAUU 1 ::::::::::: :::::::: Target 334 AGUUUGCUGAUGUUCAUCUAA 354							cDNA|uncharacterized membrane protein, putative, expressed	Cleavage	1
		2.5	LOC_Os02g56370.1	Os02g0807800	miRNA 21 ACAAACGACUACCAGUAGAUU 1 ::::.::::: ::::::.: Target 2387 GUUUUGUUGAUGUUCAUCUGA 2407							cDNA|OsWAK20 - OsWAK receptor-like protein kinase, expressed	Cleavage	1
no accumulation in Ziyu44
osa-miR1882a/b/c/d/e-5p/f/g/h	AGATTGCTTTCAAGGTCATTTCTT	2.5	LOC_Os03g02010.4	Os03g0110800	miRNA 24 UUCUUUACUGGAACUUUCGUUAGA 1 :::::::::.:::::::::.::. Target 397 AAGAAAUGAUCUUGAAAGCGAUUA 420							cDNA|DNA methyltransferase protein, putative, expressed	Cleavage	1
osa-miR812g	AAGACGGATGATTAAAGTTGGACA	0.5	LOC_Os02g07960.4	Os02g0176100	miRNA 24 ACAGGUUGAAAUUAGUAGGCAGAA 1 :: ::::::::::::.:::::::: Target 3484 UGCCCAACUUUAAUCGUCCGUCUU 3507							cDNA|STRUBBELIG-RECEPTOR FAMILY 3 precursor, putative, expressed	Cleavage	2
osa-miR812i
osa-miR812h
osa-miR812j
		0.5	LOC_Os04g47140.1	Os04g0558700	miRNA 24 ACAGGUUGAAAUUAGUAGGCAGAA 1 : ::::::::.:::::::::::: Target 658 CGCCCAACUUUGAUCAUCCGUCUU 681							cDNA|expressed protein	Cleavage	1
		1	LOC_Os02g53180.2	Os02g0771600	miRNA 24 ACAGGUUGAAAUUAGUAGGCAGAA 1 ::::::::::.:::.:::::::: Target 1368 CGUCCAACUUUGAUCGUCCGUCUU 1391							cDNA|1-aminocyclopropane-1-carboxylate oxidase protein, putative, expressed	Cleavage	1
		1	LOC_Os11g25510.1	Os11g0441900	miRNA 24 ACAGGUUGAAAUUAGUAGGCAGAA 1 :: ::::::::::.::.:::::: Target 1471 UGCACAACUUUAAUUAUUCGUCUU 1494							cDNA|protein kinase domain containing protein, expressed	Cleavage	1
		2	LOC_Os03g50620.1	Os03g0714400	miRNA 24 ACAGGUUGAAAUUAGUAGGCAGAA 1 ::.:::::::.: :::::::::: Target 1115 CGUUCAACUUUGACCAUCCGUCUU 1138							cDNA|ATP binding protein, putative, expressed	Translation	1
		2	LOC_Os03g16220.4	Os03g0269000	miRNA 24 ACAGGUUGAAAUUAGUAGGCAGAA 1 : ::::::::::::. :::::::: Target 1102 UAUCCAACUUUAAUUUUCCGUCUU 1125							cDNA|oxidoreductase, short chain dehydrogenase/reductase family domain containing protein, expressed	Cleavage	1
		2	LOC_Os03g16220.6	Os03g0269000	miRNA 24 ACAGGUUGAAAUUAGUAGGCAGAA 1 : ::::::::::::. :::::::: Target 1214 UAUCCAACUUUAAUUUUCCGUCUU 1237							cDNA|oxidoreductase, short chain dehydrogenase/reductase family domain containing protein, expressed	Cleavage	1
		2	LOC_Os03g16220.1	Os03g0269000	miRNA 24 ACAGGUUGAAAUUAGUAGGCAGAA 1 : ::::::::::::. :::::::: Target 1242 UAUCCAACUUUAAUUUUCCGUCUU 1265							cDNA|oxidoreductase, short chain dehydrogenase/reductase family domain containing protein, expressed	Cleavage	1
		2	LOC_Os03g16220.2	Os03g0269000	miRNA 24 ACAGGUUGAAAUUAGUAGGCAGAA 1 : ::::::::::::. :::::::: Target 1379 UAUCCAACUUUAAUUUUCCGUCUU 1402							cDNA|oxidoreductase, short chain dehydrogenase/reductase family domain containing protein, expressed	Cleavage	1
		2	LOC_Os03g16220.3	Os03g0269000	miRNA 24 ACAGGUUGAAAUUAGUAGGCAGAA 1 : ::::::::::::. :::::::: Target 1925 UAUCCAACUUUAAUUUUCCGUCUU 1948							cDNA|oxidoreductase, short chain dehydrogenase/reductase family domain containing protein, expressed	Cleavage	1
		2	LOC_Os03g16220.5	Os03g0269000	miRNA 24 ACAGGUUGAAAUUAGUAGGCAGAA 1 : ::::::::::::. :::::::: Target 2085 UAUCCAACUUUAAUUUUCCGUCUU 2108							cDNA|oxidoreductase, short chain dehydrogenase/reductase family domain containing protein, expressed	Cleavage	1
		2.5	LOC_Os02g07960.4	Os02g0176100	miRNA 24 ACAGGUUGAAAUUAGUAGGCAGAA 1 ::::::::::::::. ::::.:: Target 5379 CGUCCAACUUUAAUCGACCGUUUU 5402							cDNA|STRUBBELIG-RECEPTOR FAMILY 3 precursor, putative, expressed	Cleavage	2
		2.5	LOC_Os02g07960.3	Os02g0176100	miRNA 24 ACAGGUUGAAAUUAGUAGGCAGAA 1 ::::::::::::::. ::::.:: Target 3641 CGUCCAACUUUAAUCGACCGUUUU 3664							cDNA|STRUBBELIG-RECEPTOR FAMILY 3 precursor, putative, expressed	Cleavage	1
		2.5	LOC_Os02g07960.2	Os02g0176100	miRNA 24 ACAGGUUGAAAUUAGUAGGCAGAA 1 ::::::::::::::. ::::.:: Target 3745 CGUCCAACUUUAAUCGACCGUUUU 3768							cDNA|STRUBBELIG-RECEPTOR FAMILY 3 precursor, putative, expressed	Cleavage	1
		2.5	LOC_Os10g02380.1	Os10g0113000	miRNA 24 ACAGGUUGAAAUUAGUAGGCAGAA 1 :.:::.::::::: ::.::::: Target 1089 AAUUCAAUUUUAAUCUUCUGUCUU 1112							cDNA|oxidoreductase, aldo/keto reductase family protein, putative, expressed	Cleavage	1
				Os10g0113100
		2.5	LOC_Os01g66650.1	Os01g0890300	miRNA 24 ACAGGUUGAAAUUAGUAGGCAGAA 1 :::::::.:.::::::.: Target 1147 UAGUAAACUUUAGUUAUCCGUUUA 1170							cDNA|expressed protein	Cleavage	1
		2.5	LOC_Os03g33430.1	/	miRNA 24 ACAGGUUGAAAUUAGUAGGCAGAA 1 :.:: :::::::..::::: Target 286 AAAGAAGCUAUAAUCAUUUGUCUU 309							cDNA|retrotransposon protein, putative, unclassified, expressed	Cleavage	1
osa-miR812p	GACGGACGATTAAAGTTGGGCATG	0	LOC_Os02g07960.4	Os02g0176100	miRNA 24 GUACGGGUUGAAAUUAGCAGGCAG 1 :.:::::::::::::::::::::: Target 3482 CGUGCCCAACUUUAAUCGUCCGUC 3505							cDNA|STRUBBELIG-RECEPTOR FAMILY 3 precursor, putative, expressed	Cleavage	2
		0.5	LOC_Os02g53180.2	Os02g0771600	miRNA 24 GUACGGGUUGAAAUUAGCAGGCAG 1 :. :.::::::::.:::::::::: Target 1366 CGCGUCCAACUUUGAUCGUCCGUC 1389							cDNA|1-aminocyclopropane-1-carboxylate oxidase protein, putative, expressed	Cleavage	1
		2	LOC_Os02g07960.4	Os02g0176100	miRNA 24 GUACGGGUUGAAAUUAGCAGGCAG 1 :.::::::::::::: ::::. Target 5377 UGCGUCCAACUUUAAUCGACCGUU 5400							cDNA|STRUBBELIG-RECEPTOR FAMILY 3 precursor, putative, expressed	Cleavage	2
		2	LOC_Os04g47140.1	Os04g0558700	miRNA 24 GUACGGGUUGAAAUUAGCAGGCAG 1 ::::::::::.::: :::::: Target 656 AGCGCCCAACUUUGAUCAUCCGUC 679							cDNA|expressed protein	Cleavage	1
		2	LOC_Os03g16220.4	Os03g0269000	miRNA 24 GUACGGGUUGAAAUUAGCAGGCAG 1 ..: .:::::::::::. :::::: Target 1100 UGUAUCCAACUUUAAUUUUCCGUC 1123							cDNA|oxidoreductase, short chain dehydrogenase/reductase family domain containing protein, expressed	Cleavage	1
		2	LOC_Os03g16220.6	Os03g0269000	miRNA 24 GUACGGGUUGAAAUUAGCAGGCAG 1 ..: .:::::::::::. :::::: Target 1212 UGUAUCCAACUUUAAUUUUCCGUC 1235							cDNA|oxidoreductase, short chain dehydrogenase/reductase family domain containing protein, expressed	Cleavage	1
		2	LOC_Os03g16220.1	Os03g0269000	miRNA 24 GUACGGGUUGAAAUUAGCAGGCAG 1 ..: .:::::::::::. :::::: Target 1240 UGUAUCCAACUUUAAUUUUCCGUC 1263							cDNA|oxidoreductase, short chain dehydrogenase/reductase family domain containing protein, expressed	Cleavage	1
		2	LOC_Os03g16220.2	Os03g0269000	miRNA 24 GUACGGGUUGAAAUUAGCAGGCAG 1 ..: .:::::::::::. :::::: Target 1377 UGUAUCCAACUUUAAUUUUCCGUC 1400							cDNA|oxidoreductase, short chain dehydrogenase/reductase family domain containing protein, expressed	Cleavage	1
		2	LOC_Os03g16220.3	Os03g0269000	miRNA 24 GUACGGGUUGAAAUUAGCAGGCAG 1 ..: .:::::::::::. :::::: Target 1923 UGUAUCCAACUUUAAUUUUCCGUC 1946							cDNA|oxidoreductase, short chain dehydrogenase/reductase family domain containing protein, expressed	Cleavage	1
		2	LOC_Os03g16220.5	Os03g0269000	miRNA 24 GUACGGGUUGAAAUUAGCAGGCAG 1 ..: .:::::::::::. :::::: Target 2083 UGUAUCCAACUUUAAUUUUCCGUC 2106							cDNA|oxidoreductase, short chain dehydrogenase/reductase family domain containing protein, expressed	Cleavage	1
		2	LOC_Os02g07960.3	Os02g0176100	miRNA 24 GUACGGGUUGAAAUUAGCAGGCAG 1 :.::::::::::::: ::::. Target 3639 UGCGUCCAACUUUAAUCGACCGUU 3662							cDNA|STRUBBELIG-RECEPTOR FAMILY 3 precursor, putative, expressed	Cleavage	1
		2	LOC_Os02g07960.2	Os02g0176100	miRNA 24 GUACGGGUUGAAAUUAGCAGGCAG 1 :.::::::::::::: ::::. Target 3743 UGCGUCCAACUUUAAUCGACCGUU 3766							cDNA|STRUBBELIG-RECEPTOR FAMILY 3 precursor, putative, expressed	Cleavage	1
		2.5	LOC_Os03g12610.1	Os03g0227300	miRNA 24 GUACGGGUUGAAAUUAGCAGGCAG 1 :.::.::::::::.: .::::::: Target 2102 CGUGUCCAACUUUGACUGUCCGUC 2125							cDNA|DNA polymerase I, putative, expressed	Cleavage	1
		2.5	LOC_Os06g38210.2	Os06g0580100	miRNA 24 GUACGGGUUGAAAUUAGCAGGCAG 1 :.::.::::::::.: .::::::: Target 2505 CGUGUCCAACUUUGACUGUCCGUC 2528							cDNA|expressed protein	Cleavage	1
		2.5	LOC_Os06g40784.1	Os06g0610400	miRNA 24 GUACGGGUUGAAAUUAGCAGGCAG 1 ..: .::::::::.: :::.:::: Target 328 UGUAUCCAACUUUGAACGUUCGUC 351							cDNA|expressed protein	Cleavage	1
osa-miR439a/b/c/e/f/g/h	TGTCGAACCGCGGTTGTTCGA	0	LOC_Os01g26340.1	/	miRNA 21 AGCUUGUUGGCGCCAAGCUGU 1 ::::::::::::::::::::: Target 568 UCGAACAACCGCGGUUCGACA 588							cDNA|dirigent, putative	Cleavage	1
		1.5	LOC_Os09g02805.1	Os09g0116100	miRNA 21 AGCUUGUUGGCGCCAAGCUGU 1 :::::::::::: :::::::: Target 351 UCGAACAACCGCAGUUCGACA 371							cDNA|expressed protein	Cleavage	1
		1.5	LOC_Os06g19250.1	/	miRNA 21 AGCUUGUUGGCGCCAAGCUGU 1 :::::::::::: :::::::: Target 579 UCGAACAACCGCAGUUCGACA 599							cDNA|expressed protein	Cleavage	2
		2	LOC_Os06g19250.1	/	miRNA 21 AGCUUGUUGGCGCCAAGCUGU 1 :::::.: :::.::::::::: Target 549 UCGAAUAUCCGUGGUUCGACA 569							cDNA|expressed protein	Cleavage	2
		2.5	LOC_Os06g16200.1	Os06g0273200	miRNA 21 AGCUUGUUGGCGCCAAGCUGU 1 :::.: .::::::::::::. Target 594 GCGAGCUGCCGCGGUUCGACG 614							cDNA| proteins of unknown function domain containing protein, expressed	Cleavage	1
		2.5	LOC_Os01g39720.1	/	miRNA 21 AGCUUGUUGGCGCCAAGCUGU 1 : :::::::::::: ::::.. Target 731 UAGAACAACCGCGGAUCGAUG 751							cDNA|retrotransposon protein, putative, unclassified, expressed	Cleavage	1
		2.5	LOC_Os03g14010.3	Os03g0243700	miRNA 21 AGCUUGUUGGCGCCAAGCUGU 1 :..::.:.::::::::::. Target 999 CGGGGCAGCUGCGGUUCGACG 1019							cDNA|glycosyl hydrolase family 10 protein, putative, expressed	Cleavage	1
		2.5	LOC_Os03g14010.1	Os03g0243700	miRNA 21 AGCUUGUUGGCGCCAAGCUGU 1 :..::.:.::::::::::. Target 887 CGGGGCAGCUGCGGUUCGACG 907							cDNA|glycosyl hydrolase family 10 protein, putative, expressed	Cleavage	1
		2.5	LOC_Os03g14010.2	Os03g0243700	miRNA 21 AGCUUGUUGGCGCCAAGCUGU 1 :..::.:.::::::::::. Target 872 CGGGGCAGCUGCGGUUCGACG 892							cDNA|glycosyl hydrolase family 10 protein, putative, expressed	Cleavage	1
		2.5	LOC_Os12g11340.1	Os12g0215700	miRNA 21 AGCUUGUUGGCGCCAAGCUGU 1 .::.:: :.::::::::.:: Target 53 AUGAGCACCUGCGGUUCGGCA 73							cDNA|transposon protein, putative, CACTA, En/Spm sub-class, expressed	Cleavage	1
no accumulation in JNXN
osa-miR3980a/b-5p	AATCGACGGCCTCAGTCAGGG	1.5	LOC_Os08g01390.1	Os08g0104700	miRNA 21 GGGACUGACUCCGGCAGCUAA 1 :..::.::::::.:::::::: Target 312 CUUUGGCUGAGGUCGUCGAUU 332							cDNA|phosphatidylinositol-4-phosphate 5-Kinase, putative, expressed	Cleavage	1
osa-miR3980a/b-3p	CTGGCCGAGGCCGTCGATTCT	2	LOC_Os11g06934.2	Os11g0170400	miRNA 21 UCUUAGCUGCCGGAGCCGGUC 1 .:::::::.::.:::::::: Target 2511 GGAAUCGAUGGUCUCGGCCAU 2531							cDNA|expressed protein	Cleavage	1
		2	LOC_Os11g03160.1	Os11g0124900	miRNA 21 UCUUAGCUGCCGGAGCCGGUC 1 :::::.::::: ::::::: Target 131 GCAAUCGGCGGCCACGGCCAG 151							cDNA|glycosyl transferase, family 8, putative, expressed	Cleavage	1
		2	LOC_Os08g34900.1	Os08g0450100	miRNA 21 UCUUAGCUGCCGGAGCCGGUC 1 : :::::::::::::::: Target 602 CUCACCGACGGCCUCGGCCAG 622							cDNA|pectinesterase, putative, expressed	Cleavage	1
		2.5	LOC_Os10g04074.1	Os10g0130701	miRNA 21 UCUUAGCUGCCGGAGCCGGUC 1 :::::::::.::::::: Target 7415 UUCAUCGACGGCUUCGGCCAC 7435							cDNA|retrotransposon protein, putative, unclassified, expressed	Cleavage	1
		2.5	LOC_Os07g42740.1	Os07g0619500	miRNA 21 UCUUAGCUGCCGGAGCCGGUC 1 :..:::::::: :::::::: Target 1117 CGGGUCGACGGCGUCGGCCAG 1137							cDNA|DUF1645 domain containing protein, putative, expressed	Cleavage	1
		2.5	LOC_Os01g19020.1	Os01g0294700	miRNA 21 UCUUAGCUGCCGGAGCCGGUC 1 :.::::.::::: ::::::: Target 154 CGGAUCGGCGGCCGCGGCCAG 174							cDNA|peroxidase precursor, putative, expressed	Cleavage	1
		2.5	LOC_Os08g35860.1	Os08g0460600	miRNA 21 UCUUAGCUGCCGGAGCCGGUC 1 :::.::::::::::::: Target 734 GUCCUCGGCGGCCUCGGCCAG 754							cDNA|cytokinin dehydrogenase precursor, putative, expressed	Cleavage	1
		2.5	LOC_Os05g51510.1	Os05g0592800	miRNA 21 UCUUAGCUGCCGGAGCCGGUC 1 :.:::::::::::: ::.: Target 901 GCAGUCGACGGCCUCGACCGG 921							cDNA|protein phosphatase 2C, putative, expressed	Cleavage	1
		2.5	LOC_Os05g51510.2	Os05g0592800	miRNA 21 UCUUAGCUGCCGGAGCCGGUC 1 :.:::::::::::: ::.: Target 901 GCAGUCGACGGCCUCGACCGG 921							cDNA|protein phosphatase 2C, putative, expressed	Cleavage	1
		2.5	LOC_Os05g03920.1	Os05g0130100	miRNA 21 UCUUAGCUGCCGGAGCCGGUC 1 .:: :::::::::::::: Target 380 ACCGUCUACGGCCUCGGCCAG 400							cDNA|TKL_IRAK_DUF26-lf.3 - DUF26 kinases have homology to DUF26 containing loci, expressed	Cleavage	1
both up-regulated
osa-miR1320-5p	TGGAACGGAGGAATTTTATAG	1.5	LOC_Os05g47550.1	Os05g0549000	miRNA 21 GAUAUUUUAAGGAGGCAAGGU 1 ::::.::::::::..:::::: Target 2223 CUAUGAAAUUCCUUUGUUCCA 2243							cDNA|ANTH/ENTH domain containing protein, putative, expressed	Cleavage	1
		2	LOC_Os07g12330.3	Os07g0225100	miRNA 21 GAUAUUUUAAGGAGGCAAGGU 1 ::::::::.::::::.:: Target 14 CACUAAAAUUCUUCCGUUUCA 34							cDNA|tryptophan/tyrosine permease family protein, putative, expressed	Cleavage	1
		2	LOC_Os07g12330.2	Os07g0225100	miRNA 21 GAUAUUUUAAGGAGGCAAGGU 1 ::::::::.::::::.:: Target 14 CACUAAAAUUCUUCCGUUUCA 34							cDNA|tryptophan/tyrosine permease family protein, putative, expressed	Cleavage	1
		2	LOC_Os06g06760.3	Os06g0163000	miRNA 21 GAUAUUUUAAGGAGGCAAGGU 1 : ::.:::::::::::::. Target 46 GGAGAAGAUUCCUCCGUUCCG 66							cDNA|protein kinase, putative, expressed	Cleavage	1
		2	LOC_Os06g06760.2	Os06g0163000	miRNA 21 GAUAUUUUAAGGAGGCAAGGU 1 : ::.:::::::::::::. Target 46 GGAGAAGAUUCCUCCGUUCCG 66							cDNA|protein kinase, putative, expressed	Cleavage	1
		2	LOC_Os06g06760.1	Os06g0163000	miRNA 21 GAUAUUUUAAGGAGGCAAGGU 1 : ::.:::::::::::::. Target 46 GGAGAAGAUUCCUCCGUUCCG 66							cDNA|protein kinase, putative, expressed	Cleavage	1
		2.5	LOC_Os06g10980.1	Os06g0212600	miRNA 21 GAUAUUUUAAGGAGGCAAGGU 1 ::::.:::::: :.::::::: Target 1805 CUAUGAAAUUCAUUCGUUCCA 1825							cDNA|xyloglucan fucosyltransferase, putative, expressed	Translation	1
		2.5	LOC_Os12g42220.1	Os12g0616800	miRNA 21 GAUAUUUUAAGGAGGCAAGGU 1 .:.:::::::::: ::::.:: Target 1209 UUGUAAAAUUCCUACGUUUCA 1229							cDNA|expressed protein	Cleavage	1
		2.5	LOC_Os09g39910.2	Os09g0572400	miRNA 21 GAUAUUUUAAGGAGGCAAGGU 1 ::: : ::::::::::.:: Target 2153 AGAUAUACUUCCUCCGUUUCA 2173							cDNA|ABC transporter, ATP-binding protein, putative, expressed	Cleavage	1
		2.5	LOC_Os09g39910.1	Os09g0572400	miRNA 21 GAUAUUUUAAGGAGGCAAGGU 1 ::: : ::::::::::.:: Target 2178 AGAUAUACUUCCUCCGUUUCA 2198							cDNA|ABC transporter, ATP-binding protein, putative, expressed	Cleavage	1
		2.5	LOC_Os09g39910.3	Os09g0572400	miRNA 21 GAUAUUUUAAGGAGGCAAGGU 1 ::: : ::::::::::.:: Target 2240 AGAUAUACUUCCUCCGUUUCA 2260							cDNA|ABC transporter, ATP-binding protein, putative, expressed	Cleavage	1
osa-miR1320-3p	TGTAAAATTCATTCGTTCCAA	1.5	LOC_Os03g13800.1	Os03g0241200	miRNA 21 AACCUUGCUUACUUAAAAUGU 1 ::::::.:.:::::::::.:: Target 878 UUGGAAUGGAUGAAUUUUGCA 898							cDNA|ribosomal protein L7Ae, putative, expressed	Cleavage	1
		1.5	LOC_Os05g38590.3	Os05g0460800	miRNA 21 AACCUUGCUUACUUAAAAUGU 1 ::::::::.:::::::::.:. Target 512 UUGGAACGGAUGAAUUUUGCG 532							cDNA|expressed protein	Cleavage	1
		2.5	LOC_Os06g10980.1	Os06g0212600	miRNA 21 AACCUUGCUUACUUAAAAUGU 1 ::::::.:.:::::::::: : Target 1757 UUGGAAUGGAUGAAUUUUAAA 1777							cDNA|xyloglucan fucosyltransferase, putative, expressed	Cleavage	1
osa-miR169i-5p.2	TGGTGATAAGGGTGTAGCTCTG	2.5	LOC_Os11g34110.1	Os11g0543500	miRNA 22 GUCUCGAUGUGGGAAUAGUGGU 1 : ::::::::::. :.:::::: Target 1225 CUGAGCUACACCUGUGUCACCA 1246							cDNA|heparan-alpha-glucosaminide N-acetyltransferase, putative, expressed	Cleavage	1
		2.5	LOC_Os05g27710.1	/	miRNA 22 GUCUCGAUGUGGGAAUAGUGGU 1 ::::::::.:::.:::: : Target 616 ACCAGCUACACUCUUGUCACGA 637							cDNA|transposon protein, putative, CACTA, En/Spm sub-class	Cleavage	1
both down-regulated
osa-miR166j-5p	GAATGACGTCCGGTCTGAAGA		/	/
a Expect: Maximum cutoff of score based on given scoring schema
b Gene ID in Michigan State University - Rice Genome Annotation Project Database (MSU)
c Gene ID in Rice Annotation Project Database (RAP-DB)
d Multiplicity: The number of target regions between a given small RNA and target candidate
