# Supplementary material for: Identification of miRNAs Contributing to the Broad-Spectrum and Durable Blast Resistance in the Yunnan Local Rice Germplasm
Source: Front Plant Sci. 2021 Oct 14;12:749919. doi: 10.3389/fpls.2021.749919 (PMC8551726; doi:10.3389/fpls.2021.749919)
Supplement: Supplementary file 4 [file Table_4.XLSX]

## Sheet: different expression genes
Significantly differentially expressed prsdicted target genes of miRNAs
target gene ID（MSU）	target gene ID（RAP）	miRNA ID	Expression level of predicted target genes									Gene product name
			Ziyu44					JNXN
			0 hpi	3 hpi	10 hpi	22 hpi		0 hpi	3 hpi	10 hpi	22 hpi
LOC_Os02g39070	Os02g0602800	osa-miR1862d	21.7567	21.6367	30.62	47.0567		21.4233	21.0733	28.6733	33.3433	vesicle transport protein GOT1B, putative, expressed
LOC_Os08g01390	Os08g0104700	osa-miR3980a/b-5p	15.7633	29.7267	35.0033	33.8867		15.1767	24.7933	28.64	24.8267	phosphatidylinositol-4-phosphate 5-Kinase, putative, expressed
LOC_Oso8g30780	Os08g0398350	osa-miR2905	0.423333	0.81	0.546667	10.4167		0.576667	0.673333	0.103333	3.08	ABC transporter, ATP-binding protein, putative, expressed
LOC_Os05g40170	Os05g0479900		1.42333	3.06	2.86333	2.20667		2.00667	3.14667	2.57667	3.33333	expressed protein
LOC_Os01g14100	Os01g0243200		5.68333	10.9967	13.5233	15.46		5.55667	7.28333	9.61	10.2	BT1 family protein, putative, expressed
LOC_Os02g50470	Os02g0738300		10.0467	65.8933	52.2033	28.8133		12.1133	25.5033	27.0567	28.6333	expressed protein
LOC_Os08g33710	Os08g0434100		8.86	12.5767	0.63	0.806667		5.62667	5.25333	0.556667	1.03667	ribonuclease T2 family domain containing protein, expressed
LOC_Os01g09450	Os01g0190300		4.06667	7.56	3.68333	3.33		7.92667	8.01667	5.05	2.89	OsIAA2 - Auxin-responsive Aux/IAA gene family member, expressed
LOC_Oso8g31780	Os08g0411900	miR9664-3p	0.0166667	0	0	0		2.38	2.72333	2.53667	3.48667	MLA1, NB-ARC domain containing protein, putative, expressed.
LOC_Os02g18510	Os02g0286850		0.703333	1.04667	1.15	1.40333		0.92	0.786667	1.13333	1.24667	Similar to Stripe rust resistance protein Yr10. NB-ARC domain containing protein
LOC_Os11g45924	Os11g0686400		2.30667	5.89	9.24	9.92		2.28	2.80333	3.01333	3.2	WRKY41, NB-ARC domain containing protein, expressed
LOC_Os02g17304	Os02g0272900		1.63333	2.78333	3.70667	2.75333		2.53333	3.23333	3.77667	4.31667	resistance protein, putative, NB-ARC domain containing protein, expressed
LOC_Os11g34920	Os11g0550500		2.76333	5.24333	6.74667	6.55667		2.71	2.63333	3.75	3.07	stripe rust resistance protein Yr10, NB-ARC domain containing protein, putative, expressed
LOC_Os08g42700	Os08g0539700		93.9533	104.787	170.793	257.377		49.5833	50.1333	51.74	66.2733	resistance protein, NB-ARC domain containing protein, putative, expressed
LOC_Os08g29809	Os08g0387700		2.73333	7.07667	10.5133	8.99		4.23333	7.29667	9.84333	13.3833	resistance protein LR10, NB-ARC domain containing protein, putative, expressed
LOC_Os02g08364	Os02g0180000		39.71	59.95	143.043	160.087		36.3533	54.5867	154.277	111.863	protein phosphatase 2C, NB-ARC domain containing protein, putative, expressed
LOC_Os10g02380	Os10g0113000		0.243333	0.25	0.853333	0.756667		2.28333	4.33	11.96	22.25	Probable NAD(P)H-dependent oxidoreductase 1
LOC_Os12g36720	Os12g0553200		5.65	8.29333	12.0133	10.9267		8.59	12.85	18.4633	16.1767	RGH1A, NB-ARC domain containing protein, putative, expressed
LOC_Os12g37760	Os12g0565100		3.60333	7.01333	10.97	8.25		4.08	7.69	11.34	9.00333	RGH1A, NB-ARC domain containing protein, putative, expressed
LOC_Os06g17970	Os06g0287700		35.02	28.1067	7.33	16.1067		20.9733	13.8533	6.09667	8.56	NBS-LRR disease resistance protein, putative, expressed
LOC_Os08g07774	Os08g0174800		50.8233	56.6533	24.68	43.31		57.3433	61.1867	26.14	43.7233	disease resistance protein RPM1, NB-ARC domain containing protein, putative, expressed
LOC_Os12g17090	Os12g0270300		3.17333	4.02333	1.28667	1.95		5.06667	5.40333	1.85	2.43667	stripe rust resistance protein Yr10, NB-ARC domain containing protein, putative, expressed
LOC_Os01g68770	Os01g0916400	osa-miR398b	506.89	468.89	1019.79	805.913		558.283	684.473	965.283	593.79	selenium-binding protein, putative, expressed
LOC_Os07g46990	Os07g0665200		119.967	165.493	313.4	365.597		106.59	122.643	238.83	308.553	copper/zinc superoxide dismutase, putative, expressed
LOC_Os01g66760	Os01g0891700	osa-miR5542	13.5967	12.77	18.7267	9.57		0.1	0.25	0.313333	0.336667	inactive receptor kinase At2g26730 precursor, putative, expressed
LOC_Os03g45410	Os03g0657000		25.2133	29.5567	53.3433	48.9833		25.24	28.4267	42.2133	36.5867	TATA-binding protein, putative, expressed
LOC_Os04g45580	Os04g0538800	osa-miR167h-3p	5.87	8.11667	12.48	12.9667		8.53	8.09333	9.7	11.22	kinesin motor domain containing protein, expressed
LOC_Os08g40230	Os08g0513300	osa-miR396c-5p	4.92667	7.01	10.0967	7		5.70667	7.45667	8.35333	7.83333	expressed protein
LOC_Oso1g59660	Os01g0812000	osa-miR159f/a.1	0.533333	1.00667	0.896667	1.05333		0.6	0.693333	0.88	0.91	MYB family transcription factor, putative, expressed
LOC_Os03g21380	Os03g0331700		3.43333	17.4	13.79	20.2767		3.84333	8.68333	8.34667	22.0967	OsCML27 - Calmodulin-related calcium sensor protein, expressed
LOC_Os09g39740	Os09g0570900		3.52333	6.16333	8.44	6.10667		5.7	8.44667	9.92667	6.87667	ACT domain containing protein, expressed
LOC_Os07g07260	Os07g0167100	osa-miR2874	71.1267	44.7233	25.9	34.69		56.7733	48.02	31.7467	33.2867	glutamine-dependent NAD, putative, expressed
LOC_Os02g53180	Os02g0771600	osa-miR812g	71.3333	46.7833	22.99	25.6967		22.48	22.0633	10.23	12.32	1-aminocyclopropane-1-carboxylate oxidase protein, putative, expressed
LOC_Os08g04310	Os08g0137400	osa-miR528-5p	34.2367	32.88	43.6367	15.54		23.5533	16.59	33.3633	23.59	plastocyanin-like domain containing protein, putative, expressed
LOC_Os01g17150	Os01g0278900		46.9967	29.2933	5.93333	11.2133		81.62	63.21	18.06	19.1	plastid-specific 50S ribosomal protein 5, chloroplast precursor, putative, expressed
LOC_Oso4g48390	Os04g0573000	osa-miR827	2.23333	1.82	1.04	2.46		1.23667	0.876667	0.5	0.703333	uncharacterized membrane protein, putative, expressed
LOC_Os02g56370	Os02g0807800		2.35667	12.5433	19.01	11.04		2.61333	11.2067	10.0167	12.3867	OsWAK20 - OsWAK receptor-like protein kinase, expressed
LOC_Os02g45520	Os02g0678200		7.33	6.66	2.04667	2.29333		5.99667	6.74	2.90667	3.49333	uncharacterized membrane protein, putative, expressed
LOC_Os05g34460	Os05g0417100	osa-miR166i-3p	1.80667	3.84667	6.78667	4.83667		1.98	3.18333	6.49333	5.2	OsDegp7 - Putative Deg protease homologue, expressed
LOC_Os03g43930	Os03g0640800		15.38	13.9067	5.54667	6.69333		16.4267	12.06	4.68333	5.82667	START domain containing protein, expressed
LOC_Os04g46570	Os04g0551300		17.8633	13.89	10.3567	8.74		17.7633	14.73	9.96	8.68333	growth regulator related protein, putative, expressed
LOC_Os06g03830	Os06g0129100	osa-miR167a-5p/c-5p/h-5p/b/f/d-5p/g/j	15.4933	59.7033	113.067	67.8733		14.4433	31.4267	75.56	71.0467	retinol dehydrogenase, putative, expressed
LOC_Oso1g51800	Os01g0715800	osa-miR5788	12.1833	18.56	17.5833	16.0233		13.74	17.9933	17.0067	16.37	expressed protein
LOC_Os09g22505	Os09g0392666		115.113	243.457	428.507	449.363		138.643	88.35	248.693	324.167	expressed protein
LOC_Os11g02400	Os11g0116000		264.077	199.057	22.7333	52.2333		414.013	238.41	45.86	194.693	LTPL8 - Protease inhibitor/seed storage/LTP family protein precursor, expressed
LOC_Os09g31478	Os09g0491740	osa-miR7695-5p	46.8033	108.1	389.43	348.73		29.7867	33.41	133.53	142.747	auxin efflux carrier component, putative, expressed
LOC_Os03g02550	Os03g0116700	osa-miR393b-3p	47.8733	66.6367	163.353	91.9967		27.48	32.59	125.6	66.4633	OsFBX76 - F-box domain containing protein, expressed
LOC_Os05g45350	Os05g0529700	osa-miR399j	43.8633	50.2	86.98	411.783		39.92	32.8533	38.7	184.14	dnaJ domain containing protein, expressed
LOC_Os04g55230	Os04g0645100		53.6967	27.14	7.64667	9.44		49.2433	29.0133	6.23667	8.65333	tetratricopeptide repeat domain containing protein, putative, expressed
LOC_Oso6g49010	Os06g0703500	osa-miR156b/g/c/l-5p	0.983333	2.13	1.39667	1.96333		4.08	3.32667	4.34	3.95	OsSPL12 - SBP-box gene family member, expressed
LOC_Os02g04680	Os02g0139400		45.17	24.3433	13.5667	9.84		48.4967	30.1233	15.9667	11.5267	OsSPL3 - SBP-box gene family member, expressed
LOC_Os05g38590	Os05g0460800	osa-miR1320-3p	20.8567	11.7767	7.63333	8.71667		23.81	13.3433	9.12667	10.7	expressed protein
LOC_Os07g41720	Os07g0608200	osa-miR169e	9.18	8.30333	4.65333	4.07		12.42	8.64	5.74667	4.54667	nuclear transcription factor Y subunit, putative, expressed
LOC_Os03g29760	Os03g0411100		23.0267	24.55	20.7733	21.6467		36.92	23.8167	14.9833	16.6433	nuclear transcription factor Y subunit, putative, expressed
LOC_Os03g48970	Os03g0696300		59.3567	38.8367	33.2033	31.4533		75.4233	39.0767	31.98	31.05	nuclear transcription factor Y subunit, putative, expressed
LOC_Os09g10274	Os09g0274900	osa-miR1856	43.1733	58.3733	69.4267	36.7333		39.15	73.46	83.5567	68.9367	expressed protein
Reads are normalized to library size and presented in read per million (RPM).

## Sheet: mRNA-Seq raw data of 468 genes
ID	ZY-CK1_fpkm	ZY-CK2_fpkm	ZY-CK3_fpkm	ZY3-1_fpkm	ZY3-2_fpkm	ZY3-3_fpkm	ZY10-1_fpkm	ZY10-2_fpkm	ZY10-3_fpkm	ZY22-1_fpkm	ZY22-2_fpkm	ZY22-3_fpkm	ZY34-1_fpkm	ZY34-2_fpkm	ZY34-3_fpkm	ZY48-1_fpkm	ZY48-2_fpkm	ZY48-3_fpkm	JNXN-CK1_fpkm	JNXN-CK2_fpkm	JNXN-CK3_fpkm	JNXN3-1_fpkm	JNXN3-2_fpkm	JNXN3-3_fpkm	JNXN10-1_fpkm	JNXN10-2_fpkm	JNXN10-3_fpkm	JNXN22-1_fpkm	JNXN22-2_fpkm	JNXN22-3_fpkm	JNXN34-1_fpkm	JNXN34-2_fpkm	JNXN34-3_fpkm	JNXN48-1_fpkm	JNXN48-2_fpkm	JNXN48-3_fpkm	ZY-CK1_count	ZY-CK2_count	ZY-CK3_count	ZY3-1_count	ZY3-2_count	ZY3-3_count	ZY10-1_count	ZY10-2_count	ZY10-3_count	ZY22-1_count	ZY22-2_count	ZY22-3_count	ZY34-1_count
OS01G0126100	0.19	0.22	0.41	0.74	0.39	0.46	1.74	0.83	0.7	0.5	1.82	1.34	0.84	2.32	0.94	0.49	4.15	1.53	0.45	0.15	0.49	1.23	0.32	0.43	0.43	0.72	0.39	1.39	1.62	1.43	1.8	2.56	0.91	2.06	8.33	2.34	4	4	9	15.34	8.75	10	34	19	14.65	9.8	38.49	27	17
OS01G0180800	39.54	70.67	59.46	103.31	107.48	86.27	92.99	112.99	116.03	99.82	109.88	121.63	93.17	98.49	127.5	136.51	123.54	121.91	44.15	60.88	58.97	63.83	123.53	76.12	63.55	84.19	85.06	71.92	108.71	85.63	73.92	73.57	123.91	118.3	152.12	153.65	683.56	1014	1080	1626	1994.58	1431	1490	2065	1713	1705	2003	1644	1787
OS01G0190300	2.91	3.94	5.35	6.81	11.36	4.51	3.56	4.67	2.82	2.37	5.11	2.51	1.66	1.79	2.19	1.42	3.42	2.19	4.78	10.74	8.26	7.26	9.49	7.3	4.8	6.12	4.23	4	2.66	2.01	0.91	3.19	3.02	3.43	8.69	1.94	51	59	97	118	211	82	58	89	49	39	90	42	28
OS01G0243200	4.48	6.88	5.69	12.85	9.15	10.99	12.89	9.79	17.89	15.85	10.86	19.67	14.35	9.84	15.73	18.31	10.46	20.94	5.74	6.82	4.11	7.34	8.03	6.48	10.79	10.47	7.57	9.97	10.2	10.43	9.78	9.12	11.22	14.25	13.78	15.32	76	103	102	213	163	195	207	176	293.71	254.71	200	310	251.88
OS01G0278900	58.19	28.33	54.47	22.18	34.44	31.26	3.17	7.68	6.95	18.67	8.63	6.34	15.35	76.99	20.03	17.83	92.95	9.52	101.61	55.54	87.71	79.08	56.08	54.47	24.11	20.83	9.24	28.03	18.22	11.05	115.43	234.95	27.53	73.74	84.08	16.69	355	148	344	134	223	198	18	51	42	107	53	37	90
OS01G0294700	10.45	10.86	8.24	0.23	7.68	0.74	0.16	0.71	0	0.98	2.44	0	2.16	2.54	1.22	1.83	49.03	0.98	3.74	24.73	0	3.52	17.27	0	1.69	2.11	0.09	4.23	7.88	0.08	1.48	14.52	0.37	9.15	82.25	2.16	136	121	111	3	106	10	2	10	0	12	32	0	27
OS01G0310800	14.17	12.55	14.68	18.24	8.99	14.4	18.31	14.52	19.04	22.01	12.64	17.72	16.33	8.82	19.19	12.5	7.01	15.31	13.94	11.94	13.95	15.65	10.42	17.86	18	12.97	21.91	17.46	9.87	20.78	13.49	6.38	20.65	11.85	7.04	16.59	401	304	430	511	270	423	483	447	534	585	360	480	444
OS01G0316900	28.44	32.11	35.57	23.94	23.13	32.35	21.94	18.81	30.37	26.78	19.58	31.82	15.96	11.88	19.4	19.53	15.9	23.91	23.76	28.2	33.76	21.88	20.66	34.72	19.95	14.01	25.4	15.23	9.59	19.28	17.87	13.12	15.08	12.64	8.66	11.85	1096.7	1060.32	1419.84	914.06	946.73	1295	788.39	789.45	1160.83	969.93	760	1174.26	591.48
OS01G0335700	4	5.32	3.79	5.61	7.05	5.78	6.16	8.38	6.62	5.6	6.74	3.29	8.83	9.22	8.54	6.09	5.71	6.24	4.7	5.87	4.52	5.69	7.62	6.83	9.83	7.34	8.92	8.47	8.03	7.46	15.83	11.21	7.91	8.5	7.13	6.2	108	123	106	150	202	162	155	246	177	142	183	85	229
OS01G0507000	2.13	5.48	4.41	3.1	4.84	4.58	4.37	3.85	5.81	5.13	3.98	4.91	3.91	2.67	4.39	6.03	7.12	6.84	3.21	11.04	6.61	4.58	5.09	6.08	8.52	10.92	6.47	14.78	11.83	11.17	9.24	5.74	10.44	27.89	13.06	17.36	34	75	73	49	82	76	65	67	92	77	64	75	60
OS01G0510800	43.68	43.64	44.62	47.79	36.84	46.86	36.87	39.32	42.43	38.58	35.22	41.52	31.62	31.05	39.29	35.88	29.36	38.67	45.02	39.86	38.16	40.48	37.59	46.47	33.71	29.74	40.88	31.67	25.21	38.91	27.07	26.06	34.02	31.94	22.41	39.3	886.99	758.99	938	960.98	793.96	987.98	697.94	868.98	854	735.99	719.99	806.99	616.99
OS01G0544200	0.08	1.45	0.62	0.15	2.77	0.37	0.08	0.68	0.25	0.22	1.66	0.16	0.45	1.4	0.71	0.09	2.96	0.92	0.08	1.32	0.22	0.22	0.97	0.21	0.34	1.12	0.23	0.5	1.19	0.14	0.63	1.43	0.55	1.44	1.59	1.36	2	30	11	4	58	9	2	16	4	4	30	4	8
OS01G0631700	1.33	1.02	1.73	0.33	1.08	0.8	0	0.72	0	0.29	0.91	0	0.48	0.72	0.2	0.1	3.23	0.16	0.87	1.95	0.28	1.01	1.19	0.52	0.6	0.74	0.16	0.84	2.45	0.14	0.68	1.48	0.22	1.26	3.59	0	29	19	39	7	25	18	0	17	0	6	20	0	10
OS01G0715800	13.94	11.68	10.93	18.39	21.25	16.04	15.05	21.48	16.22	15.89	20.53	11.65	18.18	29.18	22.13	22.31	26.38	26.2	13.51	13.42	14.29	15.34	23.16	15.48	16.25	18.2	16.57	13.69	19.17	16.25	16.02	23.33	21.15	22.66	19.44	23.13	170	122	138	222	275	203	171	285	196	182	252	136	213
OS01G0725800	57.98	89.52	76.85	58.52	59.67	71.2	26.36	28.56	51.44	57.24	46.17	68.19	21.62	13.58	24.71	48.45	68.48	62.5	63.18	84.29	75.14	51.03	63.55	88.11	25.54	25.59	46.14	46.25	34.8	69.72	21.97	21.24	23.67	66.34	55.67	46.15	1942	2568	2665	1941	2121	2476	823	1041	1708	1801	1557	2186	696
OS01G0812000	0.35	0.76	0.49	1.55	0.71	0.76	0.74	1.02	0.93	1.28	1.09	0.79	1.54	0.84	1.77	1.26	1.39	1.62	0.5	0.23	1.07	0.51	1.1	0.47	0.97	0.53	1.14	0.81	0.39	1.53	0.42	0.48	1.16	0.82	0.68	1.71	8	14	11	34	17	17	15	24	20	26	24	17	32
OS01G0825900	2.5	2.14	1.86	4.47	5.94	4.39	5.85	6.66	4.6	6.19	8.44	6.4	7.17	11.98	9.36	6.28	5.16	5.51	2.23	2.33	2.29	4.26	8.59	3.79	5.64	7.93	5.51	4.63	11.47	7.51	7.06	8.87	9.71	6.74	5.06	8.43	56	41	43	99	141	102	122	162	102	130	190	137	154
OS01G0891700	10.94	18.27	11.58	14.09	11.04	13.18	22.48	16.85	16.85	7.67	7.22	13.82	11.93	8.26	6.89	4.01	2.02	7	0.09	0.21	0	0.23	0.52	0	0.2	0.43	0.31	0.16	0.44	0.41	0.37	2.41	0.47	0.29	1.85	0.46	167	239	183	213	179	209	320	280	255	110	111	202	175
OS01G0916400	829.6	367.52	323.55	800.76	314.38	291.53	1292.6	1079.21	687.55	845.19	942.26	630.29	335.65	374.4	269.99	247.21	244.79	173.63	1105.32	266.47	303.06	1343.8	372.47	337.15	1261.15	867.08	767.62	663.13	466.15	652.09	357.12	267.16	334.6	203.62	127.7	202.77	14526.8	5511.43	5865.11	13884.8	5842.27	5299.5	21097	20565.9	11933.4	13902.6	16611.8	10563.3	5647.82
OS01G0922600	0.83	0.97	1.16	0.99	4.33	2.4	1.21	2.98	0.91	0.72	2.17	1.02	1.26	2.75	1.84	1.28	2.51	1.49	0.81	3.04	0.62	0.8	4.51	1.7	1.06	1.64	1.59	1.26	1.93	1.49	5.56	7.55	1.45	3.21	10.76	2.56	11	11	16	13	61	33	15	43	12	9	29	13	16
OS01G0924000	222.34	111.23	177.16	131.12	142.87	131.47	39.03	32.04	39.62	38.92	24.8	33.61	32.84	139.02	49.21	41.55	171.39	35.85	237.22	102.7	187.98	195.22	148	111.75	49.68	30.24	29.59	40.59	30.74	19.65	144.93	303.02	51.7	109.07	128.14	28.82	1656	714	1369	968	1116	1025	276	258	301	273	188	254	238
OS01G0948900	22.91	9.51	12.19	16.42	7.39	12.03	13.77	9.07	21.66	8.49	6.96	18.26	7.42	6.52	11.35	6.17	6.06	8.77	26.23	14.05	12.14	18.71	9.99	9.99	18.84	10.84	17.86	13.68	8.01	16.23	15.55	9.16	12.73	7.74	4.39	7.59	284	103	157	201	97	156	162	124	270	100	86	221	89
OS02G0105100	12.02	14.88	13.2	19.62	17.74	17.61	20.56	17.96	18.28	19.62	19.87	18.87	21.6	21.33	21.13	20.01	17.05	16.98	14.86	20.6	13.64	18.67	26.85	20.08	21.1	21.93	23.18	18.25	17.07	20.62	18.97	20.77	27.52	21.9	19.48	21.65	349	372	404	530	563	480	564	592	465	695	601	429	793
OS02G0137100	52.15	59.16	57.39	56.88	50.77	49.83	44.46	57.28	50.75	40.05	47.13	36.51	34.45	29.57	40.99	32.79	25.05	34.17	65.85	69.5	46.57	68.63	61.31	65.88	47.84	53.74	60.41	35.81	38	50.38	30.3	30.49	37.85	38.49	22.84	33.16	876	851	998	946	905	869	696	1047	845	632	797	587	556
OS02G0139400	36.51	57.24	41.76	17.53	21.04	34.46	7.95	18.27	14.48	9.08	10.68	9.76	2.76	8.46	5.28	2.04	9.05	5.08	47.86	58.89	38.74	30.2	28.11	32.06	19.13	15.64	13.13	16.62	10.01	7.95	9.49	12.51	8.79	8.19	6.92	5.72	852	1144	1009	405	521	835	173	464	335	199	251	218	62
OS02G0153400	0	1.4	0	0.13	0.58	0	0	0.39	0.62	0	0	0.88	0	0.46	0	0	0.39	0.32	0	1.13	0	0	0	1.13	0	0	1.53	0	0	0	0	0	0.84	1.02	0.56	0.01	0	40.54	0	4.22	20.74	0	0	14.27	20.89	0	0	28.51	0
OS02G0165200	0.23	0.24	0.07	0.61	0.41	0.45	0.3	0.32	0.54	0.41	0.25	0.57	0.24	0.53	0.4	0.4	0.2	0.24	0.35	0.34	0.13	0.34	0.76	0.34	0.31	0.28	0.42	0.15	0.48	0.13	0.18	0.46	0.3	0.31	0.35	0.32	9.68	8.85	3.21	25.7	18.31	19.79	11.79	14.93	22.64	16.39	10.53	22.94	9.72
OS02G0174100	11.65	11.45	15.61	7.5	6.23	14.32	15.21	9.51	20.7	12.29	7.68	20.61	10.11	7.59	11.17	7.19	4.24	15.62	12.06	20.39	18.03	10.4	7.26	23.26	16.5	9.82	16.47	11.39	5.96	23.98	9.9	8.41	13.28	9.27	3.8	10.62	196	147	245	125	116	204	182	178	306	169	119	281	100
OS02G0176100	15.83	13.68	21.44	11.5	8.8	13.25	9.12	9.76	9.06	18.16	8.91	13.02	15.11	8.71	14.4	21.01	7.73	16.06	17.57	17.25	21.99	14.1	7.88	18.67	14.89	10.72	14.14	20.15	7.56	14.18	14.5	13.04	13.6	14	6.26	10.24	424	316	593	293	239	364	222	281	242	439	237	337	367
OS02G0180000	27.32	36.33	55.48	59.82	41.04	78.99	135.77	167.45	125.91	143.44	170.99	165.83	133.31	101.39	178.7	65.2	11.49	95.09	23.2	35.38	50.48	50	49.18	64.58	147.94	177.53	137.36	80.37	101.29	153.93	75.56	60.02	138.86	18.43	6.66	67.39	547	623	1150	1186	872	1642	2534	3649	2499	2698	3447	3178	2565
OS02G0272600	54.95	52.97	63.13	44.3	37.59	45.49	40.4	40.51	49.36	43.82	40.34	48.74	38.26	38.71	43.9	32.21	34.22	37.39	57.57	48.72	46.95	53.9	38.04	46.75	42.67	39.12	46.22	37.96	36.29	43.78	34.71	32.34	43.54	37.1	26.57	36.77	611	514	726	490	451	530	424	495	542	463	449	516	414
OS02G0272900	1.57	1.57	1.76	4.92	1.84	1.59	3.87	4.88	2.37	3.38	3.24	1.64	8.06	6.05	5.87	4.34	4.61	5.51	2.29	1.43	3.88	3.76	2.11	3.83	4.31	3.34	3.68	4.79	3.92	4.24	5.24	5.38	5.06	4.27	3.57	5.19	36	31	42	112	45	38	83	122	54	73	75	36	178
OS02G0280400	15.7	16.23	18.59	22.01	12.79	20.3	17.22	15.7	21.28	21.57	12.86	19.65	21.73	13.55	28.6	19.19	11.53	22.35	18.26	19.1	25.97	20.26	15.73	33.24	17.73	13.98	27.27	18.06	12	22.58	18.77	12.83	30.08	15.86	10.29	23.68	371.45	358.45	483	516.5	348.6	553	358	410	515	454	297	464	435
OS02G0286850	0.88	0.55	0.68	1.53	0.88	0.73	2.19	0.32	0.94	1.74	1.68	0.79	1.82	1.37	1.55	1.26	0.65	0.81	0.79	1.49	0.48	0.77	1.06	0.53	1.81	0.83	0.76	1.32	1.39	1.03	1.86	0.55	0.77	0.77	1.18	0.55	15	8	12	26	16	13	35	6	16	28	29	13	30
OS02G0302700	3.22	3.68	4.39	2.42	2.32	4.13	2.3	1.97	3.18	2.55	1.19	2.44	1.58	2.91	1.94	1.43	1.78	3.66	2.64	3.08	6.6	2.62	3.28	4.14	3.85	2.39	4.37	2.68	1.74	2.36	3.37	5.84	3.41	3.93	1.78	2.95	51	50	72	38	39	68	34	34	50	38	19	37	24
OS02G0511500	50.36	47.24	54.14	50.07	33.72	53.32	46.92	39.11	62.13	42.41	33.37	61.09	39.75	27.87	45.64	36.75	19.07	43.47	52.33	44.55	48.27	54.25	33.8	50.76	57.81	41.03	58.23	57.56	30.29	50.61	43.21	22.25	50.5	34.14	21.73	47.81	646	519	719	636	459	710	561	546	790	511	431	750	490
OS02G0552700	2.3	2.3	2.15	1.99	2.04	2.84	2.89	3.74	2.32	4.19	3.78	2.54	4.44	2.8	7.53	3.49	2.75	5.87	0	0.14	0.67	0.64	0.3	0.3	0.2	0.31	0.31	0.16	0.44	0.2	0.52	0.56	0.55	0.36	0.26	0.15	35	30	34	30	33	45	41	62	35	60	58	37	65
OS02G0602800	23.3	20.25	21.72	23.53	17.11	24.27	29.21	27.39	35.26	45.57	42.52	53.08	28.9	23.92	34.4	37.31	21.78	41.07	22.32	20.15	21.8	21.75	23.25	18.22	28.2	31.09	26.73	30.63	41.44	27.96	23.54	19.97	36.08	29.14	15.5	35.83	172	128	166	172	134	186	201	220	258	316	316	375	205
OS02G0678200	5.67	8.25	8.07	6.76	6.27	6.95	1.82	2.43	1.89	2.9	2.67	1.31	0.19	2.91	0.31	3.04	55.51	5.94	5.56	4.77	7.66	5.26	5.4	9.56	1.36	4.12	3.24	2.76	4.93	2.79	1.34	12.27	1.06	22.82	60.18	13.13	154	192	227	182	181	196	46	72	51	74	73	34	5
OS02G0701300	0.27	0.08	0.78	0.2	0.19	0.52	0	0	0.14	0.21	0	0.07	0.91	0	0.57	0.46	0.11	0.23	0.09	0.43	2.13	0.36	0.68	0.91	0	0.19	0.32	0.34	0.13	0.21	0.31	0.06	1.45	0.22	0	0.39	4	1	12	3	3	8	0	0	2	3	0	1	13
OS02G0729300	10.83	14.54	14.31	10.99	12.07	14.32	9.32	10.9	11.09	13.9	16.79	11.45	18.27	15.3	19.46	19.16	19.87	20.49	15.32	22.08	17.78	13.76	20.78	17.24	17.41	16.67	13.61	20.2	17.84	17.22	19.73	15.23	20.44	25.25	23.35	24.36	399	459	546	401	472	548	320	437	405	481	623	404	647
OS02G0731400	2.55	3.47	3.42	2.43	2.4	3	2.43	4.04	2.29	4.98	2.95	2.52	2.36	4.56	3.61	1.44	2.67	1.65	2.1	3.76	3.63	2	2.4	3.36	2.41	4.16	2.16	3.9	3.23	4.7	4.51	2.54	4.08	5.88	0.57	3.81	18	21	25	17	18	22	16	31	16	33	21	17	16
OS02G0738300	6.93	12.41	10.8	52.13	54.22	91.33	41.57	33.34	81.7	18.84	21.43	46.17	23.94	61.9	41.93	27.43	46.69	34.34	6.2	12.8	17.34	12.38	35.96	28.17	19.78	27.16	34.23	13.72	37.09	35.09	22.37	59.54	29.78	16.02	50.19	46.22	77	118.19	124.23	573.83	639.6	1053.99	430.74	403.33	900.18	196.72	239.89	491.2	255.76
OS02G0771600	77.97	67.77	68.26	36.09	52.72	51.54	23.72	26.89	18.36	29.39	25.12	22.58	21.05	36.76	25.97	18.96	37.81	18.31	18.99	26.76	21.69	19.74	28.84	17.61	12.83	10.93	6.93	18.05	13.22	5.69	19.78	32.8	11.29	14.59	31.32	13.7	1390	1077	1279	590	891	868	384	510	296	485	398	331	360
OS02G0776400	0.8	2.08	0.95	1.44	2.18	1.97	0.95	2.04	1.7	0.85	1.59	1.58	2.31	4.18	1.23	1.01	3.96	1.34	1.2	3.87	0.82	1.26	5.42	1.51	1.6	3.46	1.25	0.96	3.72	1.2	1.62	4.71	1.07	3.11	7.54	2.6	9	20	11	16	26	23	10	25	19	9	18	17	25
OS02G0777800	13.28	26.54	20.95	14.88	19.88	17.23	13.84	22.95	13.5	12.3	22.19	8.28	9.14	8.72	15.95	10.39	17.69	12.78	12.24	25.68	16.7	10.71	13.71	13.45	29.87	28.21	18.73	18.82	20.67	22.28	17.48	12.06	18.05	17.07	23.66	16.03	384	657	627	426	610	517	373	722	387	334	646	229	254
OS02G0796300	16.93	19.47	25.7	17.41	22.73	17.7	12.81	20.22	12.4	15.34	22.91	13.54	15.16	16.46	16.62	19.65	19.72	19.98	17.41	19.13	28.39	13.72	26.61	25.41	16.82	18.93	19.42	17.32	17.55	20.59	20.09	19.43	20.09	19.05	21.89	19.22	260	270	419	262	364	284	180	331	198	215	354	203	220
OS02G0807800	3.29	2.83	0.95	13.11	14.55	9.97	15.29	28.35	13.39	9.1	16.85	7.17	14.92	34.16	20.07	6.75	17.29	8.68	3.83	2.92	1.09	8.8	21.2	3.62	10.19	12.58	7.28	7.54	21.27	8.35	13.34	29.89	14.49	7.58	18.75	14.18	80	59	24	316	376	252	347	751	323	208	413	167	349
OS03G0109400	18.71	21.47	22.91	18.03	15.97	19.83	15.59	19.79	23.7	27.06	25.29	23.07	24.64	13.47	29.45	32.28	18.51	24.95	23.49	30.17	20.56	20.65	19.11	17.73	27.66	17.09	20.2	33.29	21.14	20.12	24.46	14.34	25.31	29.32	15.68	29.4	435	403	486.92	432	347.81	436	354	471.96	418	507.96	476.95	381	483
OS03G0110800	31.24	32.05	34.21	20.95	18.82	25.76	17.17	15	20.05	19.55	22.34	15.87	17.12	14.01	18.12	17.86	16.34	17.34	29.54	32.07	25.72	28.02	20.52	24.54	24.82	16.16	20.62	24.29	16.83	19.61	20.79	14.63	18.74	16.5	13.67	20.23	636.28	559	721.24	422.46	406.73	544.59	325.92	332.5	404.7	374.09	458	309.26	335.04
OS03G0116700	53.57	56.95	33.1	111	46.91	42	197.26	118.51	174.29	101.36	88.99	85.64	65.73	53.4	62.34	82.88	25.8	24.56	37.15	13.34	31.95	36.45	15.82	45.5	108.99	88.49	179.32	56.27	44.05	99.07	60.7	28.14	66.53	54.98	17.41	35	849	773	543	1742	789	691	2914	2044	2738	1509	1420	1299	1001
OS03G0157400	8.9	14.48	14.77	7.22	11.45	8.87	3.33	7.71	2.7	5.01	8.41	3.25	5.35	8.24	7.99	5.85	9.32	8.83	9.89	17.54	14.68	8.36	14.08	13.77	5.26	7.2	4.23	7.42	11.14	7.94	6.23	7.91	6.94	7	9.21	6.06	270	369	450.75	216	358.94	274	93	258	81	148	243	94	154
OS03G0170400	10.55	17.67	16.83	15.29	17.41	17.7	11.91	14.38	13.5	12.79	11.11	13	14.27	15.93	17.67	13.14	10.38	13.1	11.12	17.52	23.99	17.16	22.09	20.46	19.51	17.48	18.71	14.75	14.61	15.26	25.07	15.98	21.67	15.38	11.05	14.64	229	328	382	327	404	399	241	347	288	264	244	260	306
OS03G0174900	31.13	34.64	29.76	19.59	14.44	26.93	21.51	35.8	34.37	17.09	24.53	23.16	19.08	27.29	22.25	15.05	17.77	15.62	34.01	41.29	22.39	24.8	23.01	19.25	26.1	31.99	26.32	19.31	21.37	17.66	22.22	21.64	33.83	17.18	10.86	15.74	382	364	378	238	188	343	246	478	418	197	303	272	225
OS03G0195450	2.09	2.95	2.89	1.28	1.7	2.38	0.39	1.33	0.73	0.77	0.27	0.94	0.94	0.47	0.38	1.84	1.7	0.84	2.44	6.33	2.78	3.35	1.84	1.63	2.17	0.96	0.42	2.56	1.37	0.94	0.82	0.51	0.87	1.78	2.43	1.9	11.55	14	16.58	7	10	13.69	2	8	4	4	1.51	5	5
OS03G0195500	1.97	0.92	1.17	1.97	1.73	1.03	0.42	0.97	0.7	1.08	1.9	0.34	1.27	0.6	0.88	0.95	2.1	2.21	1.57	1.3	1.81	1.19	0.97	1.83	1.49	0.64	0.17	3.77	1.69	0.9	1.99	1.09	1.07	2.37	1.42	0.58	27.56	11	16.91	27.25	25.74	14.95	5.48	14.79	9.65	14.12	26.68	4.56	17.04
OS03G0227300	29.76	18.07	28	20.49	13.56	28.42	8.77	8.75	14.31	7.11	6.68	12.01	15.46	13.01	17.27	13.96	15.36	17.44	22.51	19.19	26.9	20.45	13.68	21.36	9.89	9.03	14.95	8.81	8.01	11.17	15.35	12.47	20.61	18.2	10.8	15.14	575	299	560	392	278	570	158	184	274	129	130	222	287
OS03G0241200	26.68	22.11	22.92	53.38	43.32	45.59	84.67	140.41	112.86	72.76	92.8	90.3	107.98	145.42	152.81	73.28	62.03	74.97	20.92	34.21	40.58	45.98	52.61	39.6	100.88	150.6	131.38	95.08	131.73	130.8	132.93	124.75	207.78	83.37	51.31	122.29	217	154	193	430	374	385	642	1243	910	556	760	703	844
OS03G0257600	29.77	35.67	36.76	40.44	56.38	34.78	42.71	51.84	31.51	28.16	53.81	24.03	33.01	29.24	42.22	25.18	16.29	28.75	18.09	32.76	30.37	23.08	21.84	24.79	53	48.05	25.24	50.29	52.56	31.87	59.55	23.99	29.57	16.39	12.13	13.74	610.91	626.96	780.96	821.78	1227.84	740.91	816.91	1157.77	640.98	542.88	1111.72	471.99	650.91
OS03G0269000	18.49	11.74	21.59	15.69	10.05	18.3	10.24	7.65	12.09	9.84	9.79	9.13	15.75	15.73	16.29	12.43	22.59	14.87	17.7	13.16	17.7	19.71	12.16	14.92	13.21	7.8	9.78	10.85	10.13	7.58	27.23	25.34	10.23	19.41	13.4	11.29	182	99	220	153	105	187	94	82	118	91	97	86	149
OS03G0284900	23.86	20.87	20.4	20.54	14.44	25.75	13.23	11.9	17.85	16.34	12.29	17.06	12.1	11.77	16.08	20.1	11.32	22.37	19.42	20.96	26.71	16.73	12.4	24.85	11.73	10.76	16.95	13.71	10.7	10.41	20.02	23.04	16.31	16.79	9.64	15.82	488	351	442	437	343	556	266	271	344	347	276	310	274
OS03G0304500	0.66	0.82	0.96	0.71	0.39	0.44	0.58	0.53	0.46	1.41	1.77	0.74	0.82	0.4	0.71	0.94	0.89	1.54	1.23	0.84	0.26	0.95	1.12	0.52	0.46	1.02	0.49	1.63	0.91	1.03	0.71	0.27	0.85	0.86	2.12	1.46	16	17	24	17	10	11	13	14	11	32	43	17	19
OS03G0307800	7.9	7.46	8.63	7.49	3.82	7.51	4.42	4.1	5.13	7.71	4.61	3.7	7.68	3.41	5.04	6.07	2.88	6.7	8.16	5.44	8.24	7.51	4.11	8.54	7.97	2.38	7.14	8.08	2.48	5.84	6.75	3.25	4.53	6.15	2.4	4.22	230	186	260	216	118	227	120	130	148	211	135	103	215
OS03G0310500	20.14	24.7	22.9	30.35	26.47	32.47	19.41	22.93	33.49	19.65	16.45	31.86	26.12	27.03	28.29	30.84	20.03	27.12	22.66	26.11	17.43	21.49	23.23	21.36	19.35	22.41	24.76	19.42	18.85	15.74	24.36	29.02	23.1	21.75	22.3	31.08	276	290	325	412	385	462	248	342	455	253	227	418	344
OS03G0331700	2.77	4.67	2.86	12.2	29.5	10.5	15.33	11.1	14.94	16.56	24.23	20.04	14.04	21.38	11.84	20.03	26.69	18.29	3.24	5.74	2.55	4.81	15.13	6.11	7.43	11.54	6.07	21.37	37.51	7.41	6.78	11.95	6.03	13.5	22.65	14.03	59	85	63	257	666	232	304	257	315	331	519	408	287
OS03G0337500	14.48	24.42	19.33	8.32	16.36	10.9	0.84	1.93	2.13	15.26	12.53	9.73	0.97	1.98	1.85	11.66	30.71	22.13	13.24	14.4	13.37	9.51	12.53	14.49	1.5	1.31	3.23	16.74	7.5	16.98	1.76	4.89	1.43	30.29	22.01	17.69	380.31	549.28	525.38	216.46	456.03	297.06	20.46	55.25	55.32	376.41	331.16	244.67	24.54
OS03G0407050	21.69	17.11	17.44	24.47	17.23	14.87	29.83	17.6	17.45	31.2	21.43	11.06	24.55	10.59	16.48	17.62	6.38	16.46	21.85	13.09	16.72	29.03	11.64	20.73	35.33	12.48	28.75	41.08	10.32	25.2	17.08	6.23	12.33	13.95	5.39	14.18	487.24	329.28	405.68	544.34	410.78	346.92	624.72	430.32	388.61	658.49	484.74	237.87	530.09
OS03G0411100	16.96	29	23.12	15.1	20.84	37.71	14.61	24.91	22.8	14.75	24.09	26.1	24	27.3	26.16	21.5	20.98	22.22	14.2	61.7	34.86	15.53	27.24	28.68	14.68	18.88	11.39	17.31	17.57	15.05	27.79	38.53	23.12	19.48	20.36	29.16	262	384	367	233	343	603	209	420	347	213	373	384	354
OS03G0422900	0.26	0.17	0.04	0.26	0.14	0.46	0.6	0.24	0.64	0.12	0.44	0.77	0.54	0.48	0.55	0.42	0.63	0.52	0.25	0.24	0.34	0.52	0.25	1.21	0.67	0.74	0.39	0.37	0.84	1.19	0.55	0.7	1.47	0.4	0.8	1.26	7	4	1	7	4	13	15	7	17	3	12	20	14
OS03G0624800	10.31	12	11.01	10.02	9.93	12.47	8.35	12.62	11.83	9.93	11.03	11.5	10.63	10.06	16.12	7.33	5.23	8.93	13.71	14.06	16.57	13.91	13.2	18.27	13.67	18	20.33	14.82	14.29	20.71	14.21	12.82	20.01	9.58	5.17	12.95	314	313	347	302	321	394	237	418	357	284	338	335	311
OS03G0640800	11.22	16.28	18.64	11.24	12.21	18.27	2.73	5.9	8.01	5.12	5.31	9.65	4.57	4.87	6.33	6.28	11.07	14.31	9.19	20.38	19.71	8.79	12.08	15.31	2.5	4.4	7.15	5.47	5.12	6.89	3.14	3.76	5.44	9.5	12.17	11.03	203	242	336	209	229.8	324	53	97	127	87	98	135	98
OS03G0646800	21.2	21.83	20.34	28.65	19.72	25.14	22	18.54	27.21	16.66	15.72	26.01	20.82	14.54	22.03	19.46	10.09	19.19	22.25	28.41	17.47	23.52	21.1	21.67	18.09	20.49	19.9	17	13.19	17.51	19.9	15.26	27.94	17.9	9.29	19.29	457	400	449	605	444	558	442	424	577	336	341	535	429
OS03G0647600	1.66	3.11	1.89	2.03	4.74	2.57	1.73	3.74	2.79	2.25	4.64	3.99	3.35	4.2	3.42	2.22	5.16	4.03	1.15	6.36	3.25	1.02	3.92	2.33	1.86	2.86	2.07	2.52	5.25	2.24	2.28	3.04	3.14	1.43	3.32	3.3	33	53	39	40	100	53	32	81	55	42	93	76	64
OS03G0657000	21.41	32.12	22.11	30.94	28.63	29.1	45.67	53.03	61.33	35.31	37.61	74.03	31.34	34.22	39.4	29.99	24.72	26.49	23.86	28.48	23.38	27.56	31.65	26.07	37.63	45.56	43.45	33.91	38.12	37.73	29.64	28.13	45	25.95	16.17	28.22	246	316	263	352	349	347	489	663	698.35	381	435	814	346
OS03G0696300	34.66	95.13	48.28	21.31	46.57	48.63	25.04	35.69	38.88	19.39	27.88	47.09	11.93	24.35	22.49	16.92	30.2	17.61	31.88	150.08	44.31	24.54	53.42	39.27	27.53	38.62	29.79	29.81	24.96	38.38	21.54	22.32	21.95	25.34	22.98	26.47	351	834	651	237	564	537	265	453	418	237	342	458	144
OS03G0704000	16.88	17.62	18.28	12.14	25.9	22.04	2.06	1.53	5.8	6.4	4.44	4.68	8.91	30.25	13.31	23.76	48.22	12.18	21.93	28.79	38.14	32.25	38.55	32.95	6.14	7.52	5.86	7.57	6.92	7.16	44	144.24	15.8	48.03	47.33	12.57	132	118	148	94	215	179	15	13	45	47	35	35	67
OS03G0709300	0.95	5.73	2.89	4.68	16.04	7.74	5.41	12.14	5.77	8.84	13.93	5.55	10.2	13.98	10.71	15.9	24.58	18.67	2.58	4.48	2.65	4.93	14.92	4.16	2.59	9.81	4	4.54	15.27	3.67	4.33	9.78	4.9	10.26	35.39	25.34	7	36	22	34	125	59	37	97	42	61	103	39	72
OS03G0712900	4.96	6.79	4.84	4.95	6.38	4.93	3.66	3.53	3.12	2.72	2.44	2.9	2.66	4.73	3.8	2.78	3.83	2.29	4.68	5.15	4.87	4.75	5.24	5.12	4.16	3.39	3.51	2.45	2.23	3.54	5.39	4.59	3.52	2.91	2.01	2.75	93	109	94	92	127	96	64	72	58	48	46	52	48
OS03G0714400	48.89	42.45	43.68	50.35	43.46	53.7	50.52	47.91	57.36	57.43	53.86	62.01	41.01	41.2	47.97	42.14	37.61	49.96	51.44	51.56	54.02	55.09	48	47.28	58.14	65.27	59.77	49.91	56.97	58.31	42.24	45.87	52.91	45.6	33	49.35	706	525	653	720	666	805	680	753	821	779	783	857	569
OS03G0733000	13.87	12.09	14.8	26.35	20.29	21.14	36.21	47.94	40.94	32.62	35.58	38.72	32.75	45.56	40.03	30.5	24.97	25.5	10.91	21.55	14.01	22.28	24.08	19.89	47.03	68.71	49.12	43.88	60.77	53.46	46.09	47.74	58.61	38.21	21.74	37.07	67	50	74	126	104	106	163	252	196	148	173	179	152
OS03G0743900	43.04	34.7	25.66	27.15	32.61	23.92	16.49	21.46	20.18	19.38	29.26	14.65	27.71	34.13	27.88	27.41	30.98	22.42	27.19	28.42	37.13	30.58	29.71	27.7	20.41	29.46	21.83	17.93	40.39	16.61	31.05	41.7	20.37	20.44	27.54	20.78	669	462	413	418	538	386	239	363	311	283	458	218	414
OS03G0757500	1.06	1.51	1.01	0.83	1.87	2.3	1.33	0.85	0.76	1.39	1.76	1.09	1.06	0.68	1.23	0.86	1.36	0.93	1.1	3.19	1.93	0.65	2.29	3.32	3.82	2.19	1.76	1.77	0.82	2.45	2.71	0.89	1.84	2	1.45	1.48	17.36	21.27	17.13	13.53	32.59	39.16	20.4	15.16	12.3	21.36	29.1	17.13	16.74
OS03G0758600	24.03	29.43	26.29	27.31	32.59	28.69	18.65	19.69	16.41	16.55	19.72	15.82	18.89	23.48	20.95	18.27	18.33	21.39	24.81	32.92	31.04	30.79	36.62	31.12	26.12	25.6	19.04	23.53	26.71	19.29	23.88	27.04	22.09	18.74	20.86	24.97	535	561	606	602	770	663	387	477	362	346	442	337	404
OS03G0783700	26.22	23.21	27.22	42.79	40.19	30.83	25.63	40.3	38.79	27.42	26.97	24.77	30.3	40.34	33.41	26.65	28.49	25.26	31.38	27.16	27.46	40.17	51.85	32.91	28.11	41.06	36.39	23.44	31.74	25.94	28.51	33.68	32.02	27.31	33.29	36.26	281	213	302	454	457	343	256	470	412	276	291	254	312
OS03G0789600	0.98	2.34	3.01	1.93	1.54	2.69	2.4	2.14	4.28	3.42	2.22	3.7	2.76	1.34	2.72	1.48	1.59	2.87	1.32	1.93	2.29	0.53	1	1.95	2.89	1.63	3.01	2.53	0.93	4.83	1.59	0.7	2.18	1.53	1.13	1.85	21	43	67	41	35	60	48	50	91	69	48	76	57
OS03G0790500	0.15	1.08	1.12	11.09	20.63	8.35	25.9	22.25	36.45	5.77	14.52	27.32	5.15	15.81	12.99	13.24	2.25	5.03	0.42	0.49	1.19	0.89	5.85	3.41	2.48	7.19	8.45	1.68	12.27	13.32	2.2	6.94	5.29	1.86	10.21	3.35	2	12	15	142	283	112	312	313	467	70	189	338	64
OS03G0805200	54.99	40.73	40.21	47.84	49.35	38.66	30.28	40.05	24.57	38.33	35.14	16.7	52.72	57.35	46.88	32.55	27.13	42.27	50.93	35.95	74.77	51.7	57.21	64.79	37.12	39.39	50.01	34.76	39.9	40.67	49.51	57.55	58.07	33.59	30.77	62.11	1321	838	1000	1138	1258	964	678	1047	585	865	850	384	1217
OS03G0823100	55.35	75.21	66.28	46.75	54.4	58.6	24.93	26.73	26.21	49.38	40.16	37.09	41.89	32.23	38.78	62.83	63.85	56.43	75.37	77.45	47.83	56.41	54.03	55.22	45.32	43.98	32.34	54.8	41.28	30.17	51.02	36.31	37.2	85.32	51.24	58.46	605	704	750	506	631	665	254	318	284	507	442	388	440
OS03G0823200	1.43	3.38	2.22	2.43	2.62	2.32	1.53	1.59	1.21	1.88	1.05	1.34	1.29	1.08	1.48	2.3	1.35	1.7	2.29	2.28	2.08	2.09	2.08	2.72	2.03	1	1.06	2.48	0.61	2.46	0.73	0.85	1.71	2.05	1.06	1.14	38	77	61	64	74	64	38	46	32	47	28	34	33
OS04G0350000	2.3	3.39	2.95	3.26	4.6	4.32	3.41	4.71	3.63	4.76	4.21	3.31	4.81	4.99	5.72	4.71	4.57	4.4	2.08	3.6	3.55	3.12	3.8	4.46	4.86	5.38	5.16	4.65	3.99	5.27	4.77	6.2	5.38	4.6	3.2	4.52	81	97	106	111	165	158	113	185	132	143	142	116	149
OS04G0382700	15.28	13.19	12.06	13.03	10.48	15.86	15.74	12.67	17.68	9.48	11.56	15.49	9.62	11.6	13.57	14.03	11.21	9.4	15.48	13.32	10.16	17.01	13.69	13.51	15.69	17.34	18.81	14.05	13.07	12.41	12.59	15.3	11.14	10.26	10.22	11.04	229	203	232	265	238	250	257	242	229	247	232	207	243
OS04G0467100	4.07	5.97	5.39	5.13	4.24	6.12	4.41	6.59	4.5	6.81	8.55	4.45	7.66	5.12	7.74	5.71	5.5	8.28	3.93	6.26	5.68	5.13	4.86	3.46	7.25	5.55	4.37	7.4	7	8.52	7.66	6.19	4.37	6.05	4.9	6.17	105	132	144	131	116	164	106	185	115	165	222	110	190
OS04G0513000	8.28	9.15	10.62	8.37	11.5	9.43	3.88	5.95	8.66	5.61	3.74	6.14	3.29	7.99	4.48	4.1	7.21	4.55	10.38	9.92	7.26	12.49	11.91	7.66	5.28	8	8.14	4.15	4.44	6.4	7.87	7.12	5.6	6.09	5.68	4.05	55	52	73	55	81	65	24	43	57	35	25	39	21
OS04G0538800	4.76	6.23	6.62	8.73	5.43	10.19	10.83	8.44	18.17	14.3	8.95	15.65	11.36	7.83	14.51	15.36	7.62	11.87	7.25	8.86	9.48	6.61	8.18	9.49	11.5	7.13	10.47	10.52	7.89	15.25	9.61	8.88	15.93	11.39	6.29	12.63	157.05	176	226	285	190	349	333	303	594	443	297	494	360
OS04G0551300	13.44	15.05	25.1	12.2	12.84	16.63	7.15	8.49	15.43	8.08	4.24	13.9	6.82	6.41	8.96	10.37	6.29	9.21	14.64	22.42	16.23	13.88	12.15	18.16	10.6	7.59	11.69	9.64	6.33	10.08	7.02	8.52	16.82	6.24	3.84	10	168	151	312	144	167	203	90	126	180	98	58	158	88
OS04G0558700	0	0	0.22	0.11	2.2	0.32	0.12	0.72	0.22	0	0.22	0	0	1.94	0.35	0	0	0	0	0.12	0.11	0	0	0.38	0.33	0.11	0.13	0.93	1.59	0	0.13	0.53	0	0	0.15	0	0	0	2	1	21	3	1	7	2	0	2	0	0
OS04G0563350	0.39	0.3	0.56	0.71	0.57	0	1.91	0.93	1.03	0.98	0.55	0.36	2.07	2.3	2.03	1.46	0.58	1.01	0	0.51	0.4	0.9	0	0.11	0.68	1.4	1.09	1.38	1.45	1.33	1.02	0.7	0.73	1.11	0.61	0.34	3.99	2.66	6	7.29	6.24	0	18.38	10.46	10.58	9.47	5.67	3.58	20.49
OS04G0573000	1.13	1.37	4.2	2.14	1.5	1.82	1.5	0.17	1.45	3.46	1.35	2.57	2.32	0.82	4.42	4.63	4.04	5.14	0.56	1.25	1.9	0.67	0.85	1.11	0.34	0.18	0.98	1.04	0.25	0.82	0.43	0.5	1.63	5.04	2.75	2.3	30	31	115	56	42	50	37	5	38	86	36	65	59
OS04G0583600	0	0	0	0	0.16	1.16	0	0	0	0.37	0.86	0.18	0.36	0.3	0.91	0.39	0.89	0.4	0	0.18	0.18	0	0.19	0	0.69	1.63	0	0.58	0.98	0.9	1.37	1.31	0.41	0.38	0.23	0.4	0	0	0	0	1	7.01	0	0	0	2	5.01	1	2.01
OS04G0600900	1.12	2.18	2.02	0.3	1.55	1.44	0.32	1.85	1.21	1.03	1.56	1.33	1.17	1.23	1.27	0.34	0.7	0.95	1.31	3.25	1.07	1.38	2.7	0.93	2.32	2.9	0.61	0.62	1.49	0.7	1.1	3.04	0.45	0.57	1.11	0.7	15	25	28	4	22	20	4	27	16	13	21	17	15
OS04G0609900	16.76	14.19	17.12	14.63	12.9	14.85	9.97	11.28	10.64	12.12	10.27	9.06	14.34	8.51	13.56	10.25	7.76	15.87	17.49	13.23	19.9	17.61	10.8	17.98	14.41	8.78	14.12	16.25	8.74	13.88	15.06	9.94	15.94	15.96	9.03	14.58	545	395	576	471	445	501	302	399	343	370	336	282	448
OS04G0632400	0.85	0.73	1.2	0.77	0.92	1.16	0.76	0.9	0.48	0.82	1.46	0.81	2.09	1.3	1.25	1.17	1.04	0.93	1.59	1.07	1.56	1.45	1.14	2.27	1.18	1.51	1.22	1.85	1.64	1.66	3.42	1.54	3.31	3.37	1.24	1.36	33.25	20	49.6	28.56	29.29	39.23	19	29	13.69	26.82	37.05	21.41	57
OS04G0645100	49.47	44.33	67.29	14.53	29.05	37.84	6.62	4.56	11.76	9.29	6.72	12.31	15.06	28.15	17.79	25.98	74.49	25.66	60.64	48.39	38.7	30.64	23.03	33.37	7.11	4.84	6.76	10.06	7.22	8.68	37.66	74.71	17.26	61.13	112.31	28.6	1634	1236	2196	483	1023	1194	186	152	356	305	217	344	506
OS04G0658800	0.25	0.43	1.08	0.75	0.47	0.48	0.27	1.02	0.37	0.4	0.12	0.39	0.52	1.4	0.26	0.56	1.06	0.86	0.5	1.32	1.02	0.76	0	0.28	0.99	0.35	0.15	1.34	0.59	0.77	0.98	0.94	0.3	1.08	0.33	0.14	2	3	9	6	4	4	2	9	3	3	1	3	4
OS04G0684100	26.1	26.02	16	35.77	14.09	27.39	76.73	40.22	36.59	150.38	107.02	85.65	158.52	57.59	88.63	248.84	64.52	168.65	16.72	39.95	11.74	28.74	28.84	13.05	26.2	39.81	16.38	64.86	62.37	22.55	60.36	22.74	58.75	97.75	23.64	77.97	378	320	253	520	208	436	983	624	517	2029	1484	1162	2277
OS05G0130100	39.38	25.18	27.04	78.63	43.88	34.62	103.79	91.11	85.85	75.8	83.63	78.83	60.31	53.86	68.92	39.51	17.64	34.13	47.75	24.99	18.58	56.94	41.74	29.47	73.41	56.89	73.77	72.56	52.84	79.36	48.43	34.21	47.56	24.96	18.81	26.12	882	483	627	1744	1043	805	2167	2221	1906	1595	1886	1690	1298
OS05G0144200	32.82	24.14	25.99	35.33	17.02	36.88	54.25	44.01	56.79	41.3	34.87	49.98	44.22	26.17	59.74	28.98	14.36	32.59	34.45	26.89	37.56	34.56	17.53	31.28	61.55	32.03	53.48	46.38	27.98	53.69	46.67	25.6	62.41	30.63	11.22	35.06	516	325	423	550	284	602	795	753	885	610	552	752	668
OS05G0147100	15.83	10.11	15.56	15.1	14.34	12.7	12.52	16.17	14.67	14.32	14.58	13.56	10.04	11.11	13.76	8.86	10.64	12.58	14.23	12.63	15.02	14.69	18.88	18.55	12.58	16.63	19.55	14.06	18.21	19.17	14.13	14.96	16.14	14.66	11.35	11.28	233	127.44	237	220	224	194	171.77	259	214	197.93	216	190.97	142.02
OS05G0241100	0.38	0.24	0.3	0.78	0.36	0.31	0.74	0.91	0.56	1.05	0.67	0.95	1.13	1.24	1.49	0.87	0.29	2.27	0.61	0.55	0.86	1.24	0.97	0.52	1.42	1.59	1.29	1.1	1.08	0.7	2.12	1.98	2.04	1.31	1.43	0.87	10	9	9	25	13	12	19	27	14	24	17	20	31
OS05G0243100	0.41	0.24	0.33	0.49	0.26	0.4	0.3	1.14	1.25	0.29	0.34	0.58	1	1.2	1.54	1.41	0.65	1.12	0.19	0.22	0.14	0.3	0.31	0.08	0.62	0.59	0.81	0.75	0.52	0.43	0.86	0.59	1.74	1.58	0.28	0.89	6	3	5	7	4	6	4	18	18	4	5	8	14
OS05G0274200	0.25	0.47	0.96	0.91	0.35	1.1	0.43	1.11	1	0.66	0.86	1	2.48	2.69	3.55	2.35	0.98	2.3	0.84	0.95	1.14	0.57	0.31	0.98	1.21	1.2	1.53	0.93	1	1.09	2.29	3.22	3.27	1.83	1.04	1.85	8	13	32	29	12	37	13	39	32	20	28	31	77
OS05G0417100	1.73	1.56	2.13	4.28	2.85	4.41	5.19	7.98	7.19	3.36	5.06	6.09	7.11	10.82	13.54	5.68	4.73	8.33	1.05	1.79	3.1	3.54	2.93	3.08	3.33	8.28	7.87	4.18	5.46	5.96	9.18	10.13	13.37	4.81	3.49	9.91	40	31	51	98	70	106	112	201	165	73	118	135	158
OS05G0460800	21.81	19.96	20.8	10.12	9.77	15.44	6.67	9.05	7.18	13.44	6.53	6.18	10.92	9.21	9.44	13.94	16.05	17.75	28.57	25.23	17.63	16.64	11.71	11.68	12.02	8.25	7.11	15.43	10.5	6.17	12.98	13.89	7.53	23.51	16.88	12.32	206	176	218	99	98	154	62	89	65	118	64	54	102
OS05G0479700	2.17	2.42	2.91	1.35	1.77	3.81	1.17	1.68	1.25	1	1.03	1.65	1.03	0.9	2.78	0.28	0.34	0.75	3.47	2.62	3.8	2.4	1.73	3.85	1.78	2.2	2.09	1.44	0.94	1.9	2.3	1.17	3.5	0.97	0.4	1.68	44	42	61	27	38	80	22	37	25	19	21	32	20
OS05G0479800	0.61	0.33	0.52	0.87	0.6	0.64	0.68	0.85	0.45	0.58	0.51	0.5	1.39	1	0.74	0.94	0.79	0.52	0.86	0.54	0.62	1.29	0.86	0.97	1.12	0.94	1.01	0.56	0.91	0.89	2.14	1.72	1.3	0.87	1.03	1.08	19	9	17	27	20	21	20	29	14	17	16	15	42
OS05G0479900	1.15	2.21	0.91	2.8	2.8	3.58	1.74	3.85	3	1.73	2.28	2.61	1.97	3.65	4.17	1.76	4.16	2.83	1.1	3.81	1.11	3.1	4.35	1.99	2.5	3.72	1.51	2.37	5.46	2.17	4.3	5.3	2.43	3.99	3.19	4.35	17	28	14	41	44	55	24	62	44	24	34	37	28
OS05G0492100	0.25	0.15	0.11	0.16	0.12	0.28	0.3	0.42	0.34	0.54	0.08	0.21	0.75	0.32	0.92	0.57	0.23	0.83	0.45	0.7	0.79	0.38	0.32	0.89	0.33	0.31	0.71	0.28	0.21	0.15	1.04	0.77	1.34	0.77	0.34	0.77	10	5	4.49	6.19	5	11.43	11	18	13.12	20	3	8	28.49
OS05G0499500	17.78	18.6	17.59	22.29	16.89	20.92	23.14	21.2	20.97	28.51	20.36	18.58	26.98	19.32	21.4	29.06	16.07	25.72	17.75	18.81	16.04	23.56	17.02	16.87	26.16	14.83	18.29	25.8	14.11	19.33	17.69	14.78	19.79	20.67	17.5	20.9	249	223	255	309	251	304	302	323	291	375	287	249	363
OS05G0521600	0.99	1.16	1.03	1	1.94	1.76	0.41	0.98	0.38	0.73	1.13	0.48	0.16	0.7	0.24	0.09	2.28	0.35	2.16	5.18	1.25	1.95	3.18	0.34	0.99	0.87	0.72	1.33	1.3	0.39	0.78	1.01	0.64	0.5	1.33	0.62	13	13	14	13	27	24	5	14	5	9	15	6	2
OS05G0529700	32.58	58.72	40.29	48.75	51.28	50.57	130.47	63.45	67.02	526.23	389.99	319.13	187.81	39.91	121.65	789.97	270.56	773.18	32.09	47.99	39.68	24.57	34.7	39.29	41.91	41.96	32.23	225.4	218.71	108.31	43.92	26.76	84.92	383	297.3	419.16	454	715	591	682	757	740	1721	968	927	7170	5656	4329	2626
OS05G0549000	59.11	58.82	56.55	76.35	51.95	61.54	70.82	63.85	80.69	73.99	63.5	85.94	53.5	40.89	60.24	53.04	31.66	58.46	55.46	64.03	75.19	64.22	63.54	78.56	63.01	56.35	93.97	69.15	50.52	102.41	48.6	30.04	60.76	45.4	33.22	53.96	1192	1012	1171	1506	1107	1284	1317	1398	1604	1385	1277	1628	1030
OS05G0553800	5.66	5.94	5.87	6.08	8.63	7.76	4.22	7.77	6.59	5.06	7.08	3.44	6.94	10.53	8.05	8.64	9.58	8.77	6	7.78	7.65	6.29	8.99	6.82	6.29	11.05	9.55	6.71	10.59	8.61	6.24	9.05	8.26	8.4	6.29	6.18	68	61.5	73	72	110	98	47.5	101.5	78.5	58.5	87	40	82
OS05G0557700	12.61	5.14	24.45	20.97	6.73	19.38	22.14	6.49	23.58	18.74	5.68	17.25	20.96	9.5	30.44	12.54	7.27	25.65	17.67	9.67	35.26	30.01	9.18	42.28	34.44	9.69	47.05	29.52	9.26	43.17	30.36	15.01	45.7	30.82	17.24	42.72	507	177	1018	835	287	809	830	284	940	708	230	664	810
OS05G0592800	13.16	18.12	24.82	15.84	16.13	20.7	10.68	11.91	16.89	24.18	23.44	24.6	12.96	12.18	18.54	16	23.72	29.67	15.35	17.48	23.57	12.45	14.17	22.53	10.01	12.84	13.49	22.13	20.07	24.97	13.07	12.93	19.43	19.57	22.96	24.24	279	329	545	325	363	456	211	268	355	461	490	499	264
OS06G0129100	10.43	23.73	12.32	71.96	52.17	54.98	89.25	158.52	91.43	52.7	83.1	67.82	100.83	246.37	113.88	47.76	220.39	72	5.16	10.21	27.96	27.49	41.66	25.13	48.18	128.21	50.29	68.21	93.66	51.27	137.94	171.06	114.67	57.48	77.2	113.71	153	298	187	1045	812	837	1220	2530	1329	726	1227	952	1421
OS06G0154200	49.3	52.36	42.95	46.05	48.1	45.34	54.85	53.17	45.82	58.21	59.59	60.67	44.82	28.1	46.24	44.49	26.02	39.18	54.27	51.34	45.15	54.6	55.15	56.92	49.15	54.8	55.94	55.79	46.59	68.37	42.76	30.17	49.11	42.4	23.77	35.6	1101.78	1006.66	1019.33	993.31	1163	1078.71	1103.7	1235.71	1001.72	1271.04	1391.25	1261.73	1030.01
OS06G0158300	0.91	0.78	1.19	0.84	0.5	1.83	1.9	2.58	2.51	0.97	1.14	2.13	3.65	4.33	3.53	2.16	1.1	1.74	1.09	1	1.48	0.71	1.03	2.09	1.9	2.06	1.92	1.12	1.12	2.03	4.29	3.67	4.72	2.4	0.61	2.01	34	25	46	31	20	71	66	105	93	34	43	76	131
OS06G0158500	0.08	0.02	0.1	0.25	0.02	0.3	0.71	1.12	0.94	0.37	0.25	0.5	1.42	1.4	1.27	0.33	0.23	0.7	0.11	0.11	0.23	0.15	0.12	0.47	0.93	0.55	0.63	0.29	0.33	0.34	1.83	1.15	1.27	0.56	0.17	0.41	4	1	5	12	1	15	32	59	45	17	12	23	66
OS06G0159900	1.48	1.63	2.25	3.3	2.79	3	1.34	3.86	2.43	1.41	3.48	1.87	4.21	2.16	5.12	5.55	7.18	6.14	2.52	2.97	2.39	3.09	6.24	3.96	4.28	2.58	1.92	3.44	3.62	3.79	3.62	1.84	4.11	9.51	7.33	8.19	19	18	30	42	38	40	16	54	31	17	45	23	52
OS06G0163000	3.11	4.09	3.37	3.86	7.14	5.04	4.34	5.51	4.03	5.96	8.45	3.35	8.09	9.12	6.83	5.32	12.23	9.44	4.25	6.81	5.43	6.71	9.25	6.87	14.71	9.29	6.02	14.28	14.59	7.82	23.28	21.83	8.63	14.5	16.21	11.8	92	100	101	112	217	154	118	169.16	117	156	242	96	221
OS06G0188550	6	8.24	8.61	5.8	5.93	8.22	6.84	7.14	6.56	9.26	5.71	5.91	10.2	4.23	6.87	7.61	4.08	7.51	6.33	8.62	7.67	7.64	6.54	8.45	10.27	6.45	6.3	9.34	3.97	4.69	7.1	6.47	8.62	6.6	2.67	5.93	142	167	211	136	149	202	151	184	154	206	136	134	232
OS06G0287700	26.17	44.01	34.88	23.03	26.86	34.43	5.64	4.91	11.44	18.51	11.1	18.71	6.82	11.59	9.14	20.14	29.78	29.57	16.94	23.93	22.05	10.72	11.64	19.2	4.45	3.84	10	8.89	6.27	10.52	13.02	16.7	7.32	28.48	25.76	14.44	995	1433	1373	755	1084	1359	200	203	431	661	425	681	249
OS06G0567900	0	0	0	0.24	6.55	0.29	0	0.13	0	0	0.3	0	0	0.79	0.15	0.05	2.34	0.05	0	0	0	0	0.35	0	0	0	0	0	0	0	0	14.34	0	0	5.34	0	0	0	0	5	148.82	6.55	0	3	0	0	6.56	0	0
OS06G0580100	704.19	1068.61	730.95	970.83	1286.53	939.99	917.12	1492.19	720.2	891.08	1230.02	703.72	1544.16	2088.52	1207.8	1434.41	1609.41	1228.76	0.35	0.15	0.29	0.31	0.32	0.16	0.56	0.6	0.82	0.47	1.19	0.58	0.63	0	0	0.76	2.17	0.57	5507	7255	5935	7619	10587	7695	6727	12515	5764	6599	9550	5358	11467
OS06G0605600	3.85	2.97	4.32	5.06	2.9	5.12	6.11	6.44	7.07	6.31	5.89	8.05	7.37	5.83	7.61	6.63	3.23	5.19	6.45	5.56	4.34	7.68	6.44	4.09	9.33	8.54	8.32	6.94	4.9	7.03	6.74	7.5	7.85	5.72	4.04	6.31	50	33	58	65	40	69	74	91	91	77	77	100	92
OS06G0651600	43.79	40.32	38.51	45.59	33.22	49.39	53.83	45.98	57.38	46.26	38.98	46.46	54.58	44.94	59.35	39.33	27.24	38.47	36.22	34.9	33.65	42.24	27.14	35.05	58.86	42.74	43.15	42.62	39.49	41.97	73.97	50.27	53.5	34.97	30.25	40.52	729	577	667	756	590	855	838	836	951	726	657	740	877
OS06G0663500	4.89	3.41	4.42	6.69	4.16	6.53	4.65	6.01	6.6	6.8	5.87	3.46	6.15	5.62	7.12	5.72	5.19	4.49	5.64	5.44	6.22	6.96	7.12	6.77	6.71	7.33	5.28	7.17	5.92	5.64	9.05	6.11	8.8	7.32	5.2	9.04	62	37	58	84	56	86	55	83	83	81	75	42	75
OS06G0680900	5.96	4.34	7.34	7.01	3.13	7.24	5.79	8.24	7.03	7.32	4.46	12.72	8.91	14.36	12.66	9.14	6.56	5.5	3.74	6.01	4.77	8.42	6.21	3.63	8.96	13.17	7.99	10.48	9.84	6.88	11.32	12.63	12.62	10.34	5.3	6.79	46	33	55	56	26	58	41	66	49	53	32	79	67
OS06G0703500	0.17	1.86	0.92	1.48	3.03	1.88	0.99	1.5	1.7	1.31	1.26	3.32	0.99	2.74	1.97	1.7	1.85	2.6	2.62	4.23	5.39	2	3.56	4.42	3.33	4.3	5.39	5	2.36	4.49	4.45	3.11	8.91	3.22	3.46	9.62	4.13	32	18	25	61	40	15	30	29	27	22	57	18
OS06G0713800	0.48	0.7	0.52	0.6	0.22	0.23	0.7	0.27	1.5	3.11	4.61	5.1	1.73	0.26	2.78	7.49	0.81	7.82	0.4	1.26	1.71	0.11	0.87	2.02	0.36	0.9	0.77	2.09	2.38	3.15	0.14	0.28	2.93	2.08	0.64	5.99	8	10	9	10	4	4	11	5	25	49	78	82	28
OS07G0106000	1.2	2.47	2.37	0.77	1.11	2.58	0.88	1.45	1.79	0.42	1.55	0.65	0.22	1.36	1.15	0.3	3.49	0.86	1.21	2.68	2.46	0.5	1.15	1.27	0.81	1.46	1.36	0.17	1.26	0.7	0.67	4.23	1.05	0.23	5.26	0.38	31	44	61	24	28	59	24	39	41	14	33	11	7
OS07G0167100	83.04	64.64	65.7	47.86	37.81	48.5	25.57	24.95	27.18	49.61	25.82	28.64	30.23	22.75	29.85	40.45	35.71	32.64	80.46	42.73	47.13	69.06	29.71	45.29	42	23.15	30.09	49.13	20.93	29.8	36.83	19.58	31.56	55.15	28.32	33.69	1575	1050	1290	899	761	955	452	515	511	884	493	520	551
OS07G0225100	0.45	0.24	0.23	1.68	0.94	0.45	2.18	2.26	0.81	1.66	1.13	1.35	2.49	2.29	2.69	1.84	1.96	1.62	0.58	0.37	0.68	0.37	0.53	0.82	1.86	1.89	1.08	1.37	2.45	0.91	3.36	3.03	1.77	1.4	1.31	1.83	5.85	2.68	3	21.45	12.9	6	26.21	31.62	10.4	20.11	14.6	16.63	30.86
OS07G0246300	15.78	16.23	15.87	23.61	23.12	23.64	20.35	25.14	23.52	18.96	24.16	18	20.34	32.74	28.99	18.46	20.74	22.28	14.57	14.45	17.07	27.65	33.76	24.05	20.65	29.24	25.33	19.81	29.09	24.1	24.09	32.15	29.35	23.63	25.14	29.56	218	192	227	323	339	339	262	378	322	246	336	238	270
OS07G0296000	5	5.81	5.73	4.45	3.06	6.79	7.12	5.11	6.52	12.48	6.75	8.12	6.86	1.66	5.56	10.31	2.82	9.44	5.71	8.54	6.38	5.82	3.82	8.74	9.18	3.99	5.68	14.36	3.28	7.85	3.87	1.74	6.79	6.13	2.77	4.91	188.25	187.34	223.35	165.91	122.38	265.4	249.81	209.54	243.47	441.35	255.76	292.75	248.38
OS07G0409400	0.1	0	0.1	0.3	0.38	0.19	0.05	1.15	1.06	0.05	0.2	0.37	0.89	1.26	1.75	0.34	0.51	0.76	0.2	0.43	0.51	0	0.23	0.4	0.05	1.19	1.18	0.42	1.09	0.93	1.19	1.09	2.1	0.38	0.07	0.82	2	0	2	6	8	4	1	25	21	1	4	7	17
OS07G0466200	11.14	10.76	12.15	11.43	7.59	11.24	7.79	10.06	9.15	9.89	8.46	9.63	9.01	8.56	13.29	12.89	7.49	12.25	14.53	12.52	12.45	14.5	11.41	10.16	12.77	8.16	9.08	11.18	6.43	6.87	8.96	6.15	15.97	12.77	6.72	10.34	233	192	260.07	238	168	244	151	226.35	191	192.23	178.34	192	180.49
OS07G0495250	0.45	0.62	0.6	1	0.27	0.69	0.48	0.59	0.58	0.57	0.45	0.86	1.11	1.02	0.77	0.93	0.83	0.99	0.79	1.36	1.14	0.84	0.93	1.13	1.18	0.72	0.96	1.02	0.47	0.74	0.91	0.69	1.03	1.43	0.51	1.04	17.02	20	23.15	37.03	10.92	27.03	16.77	24.08	21.45	20.02	16.96	31.03	39.98
OS07G0522600	2.17	1.71	2.76	2.57	0.85	2.37	2.65	3.97	4.31	3.22	2.01	3.44	6.09	5.04	5.46	3.89	3.01	4.3	2.73	2.95	3.52	3.05	1.66	2.41	4.77	3.54	3.4	3.36	2.46	3.32	7.34	5.73	7.32	3.79	1.72	3.8	76	53	100	84	34	88	87	158	154	106	76	116	201
OS07G0562800	69.9	126.37	89.9	95.34	87.46	109.26	58.73	57.26	66.59	112.11	64.62	129.58	43.48	24.92	49.66	131.51	76.9	115.37	77.95	153.27	84.95	84.78	93.17	95.63	60.85	49.7	62.03	114.18	53.86	84.22	36.59	27.47	61.65	123.1	71.7	104.44	1753	2524	2163	2354	2364	2490	1344	1527	1355	2931	1702	2536	1177
OS07G0563000	12.07	14.3	6.16	9.93	9.91	8.31	10.18	6.66	14.44	6.98	2.91	9.73	3.41	6	4.21	5.08	4.43	3.41	10.95	15.39	9.55	10.8	9.35	7.6	8.29	11.45	6.28	5.18	7.37	6.8	8.82	6.19	6.41	7.53	12.77	7.87	70	71	37	57	61	50	55	42	83	38	17	54	19
OS07G0599100	0.09	0.16	0.37	0.1	0.1	0.33	0.74	0.99	0.45	0.11	0.09	0.18	1.26	1.81	1.84	0.22	0.18	0.32	0	0.07	0.36	0.18	0	0.51	0.52	0.76	0.73	0.09	0.33	1.04	1.81	1.73	1.58	0.26	0.14	0.73	2.64	4	11	3	3	10	20	31	13	3	2.71	5	35
OS07G0608200	6.45	11.43	9.66	5.42	8.67	10.82	1.94	6.39	5.63	4.17	4.1	3.94	5.51	6.56	7.55	5.91	8.74	8.59	6.95	18.94	11.37	6.27	11.87	7.78	5.01	7.97	4.26	5.2	5.51	2.93	7.74	7.05	6.96	6.57	7.03	7.63	89	135	138	74	127	155	25	96	77	54	57	52	73
OS07G0619500	4.18	4.88	3.84	8.8	11.63	6.38	10.85	11.02	10.2	6.31	9.63	7.36	10.81	16.43	12.52	7.11	9.96	5.75	6.59	8.96	2.64	7.32	21.18	4.89	12	13.88	7.45	11.34	23.25	10.99	10.37	16.73	9.74	7.08	21.87	7.67	60	60	57	125	177	95	145	172	145	85	139	101	149
OS07G0623600	0.31	0.37	0.39	0.08	0.89	0.19	0.21	0.14	0.2	1.67	0.62	0.87	0.57	0.2	0.42	3.76	2.35	1.6	0.32	0.67	0.24	0.69	0.62	0.53	0.31	0.5	0.18	0.43	0.37	0	0.89	2.07	1.03	1.87	2.74	0.37	4	4	5.15	1	12	2.48	2.5	2	2.58	20	8	10.59	7
OS07G0628600	0.1	0.11	1.38	0	0.09	0.18	0.61	0.53	0.86	0.1	0	0.2	0.79	0.75	1.32	0.76	0	0.44	0.64	1.52	0.68	0.17	0.22	0.43	0.48	0.72	0.78	0	0.09	0	0.76	0.81	0.57	0.31	0	0.33	1	1	15	0	1	2	6	6	9	1	0	2	8
OS07G0661400	13.7	25.3	23.7	25.63	80.26	45.42	27.92	53.48	41.04	22.73	41.56	24.75	55.27	51.36	59.13	28.04	20.62	29.74	28.54	44.56	49.87	35.79	82.16	58.23	65.9	70.19	52.26	52.1	81.12	48.68	110.63	107.08	79.37	37	60.2	62.52	129	204	231	239	802	444	245	548	383	201	394	223	500
OS07G0665200	90.74	119.26	149.9	167.33	154.62	174.53	299.26	340.22	300.72	380.78	378.93	337.08	377.56	344.42	330.65	384.33	298.68	341.01	55.45	97	167.32	90.09	124.08	153.76	218.61	267.26	230.62	247.58	312.44	365.64	240.82	239.26	269.74	265.35	197.11	347.12	621	699	1062	1134	1123	1240	1909	2534	2040	2448	2611	2208	2483
OS07G0687900	22.39	54.41	39.04	42.06	51.85	23.88	41.34	61.92	13.64	62.84	94.15	25.44	32.08	38.38	26.88	45.8	41.72	34.62	33.58	36.52	14.61	32.12	44.66	23.09	36.74	36.81	17.76	45.43	57.11	41.54	39.14	34.55	20.14	35.48	14.78	25.01	308	641	556	573	757	341	530	927	186	812	1304	335	424
OS07G0693400	2.12	2.03	1.91	1.9	1.91	1.86	1.45	1.24	1.95	2.47	1.44	1.67	3.77	1.81	2.31	3.39	1.9	3.98	2.15	1.64	2.13	2.3	1.96	1.91	2.37	1.33	1.64	1.97	0.87	2.7	1.76	1.55	1.85	3.11	1.5	3.05	44	36	41	39	42	40	28	28	40	48	30	33	75
OS08G0104700	15.32	16.92	15.05	31.53	25.26	32.39	39.96	30.3	34.75	36.18	32.29	33.19	35.82	27.72	33.92	27.66	14.35	25.44	12.74	15.92	16.87	17.99	29.78	26.61	29.92	25.03	30.97	23.5	22.4	28.58	23.02	28.22	32.74	16.52	17.98	22.5	601	561	626	1269	1114	1326	1500	1342	1314	1492	1290	1184	1544
OS08G0109100	36.28	42.22	45.65	36.12	27.62	45.2	23.55	20.88	39.45	28.24	24.5	41.3	24.08	16.49	33.25	28.86	20.17	35.24	38.74	50.17	45.48	34.18	27.98	42.08	26.55	19.53	25.77	25.97	19.08	25.9	24.07	17.14	31.33	23.57	16.59	28.47	846	829.84	1144	852.85	669	1010.68	528.85	545.82	828.87	657.93	591.83	784	605
OS08G0137400	13.52	30.44	58.75	13.05	45.32	40.27	34.42	70.91	25.58	7.51	24.24	14.87	6.64	13.22	26.79	3.1	14.3	10.45	6.16	41.6	22.9	9.96	24.8	15.01	47.78	36.88	15.43	17.75	25.16	27.86	26.24	31.69	8.45	3.57	13.01	7.69	100	189	443	101	360	312	239	594	182	51	183	101	57
OS08G0157100	25.8	22.64	20.66	25.44	18.67	20.31	18.8	19.6	19.02	24.25	17.88	19.57	24.33	19.6	27.66	21.29	15.19	29.2	25.78	26.05	25.64	26.8	21.01	28.75	20.37	15.64	21.21	20.16	16.18	22.43	19.83	15.81	26.16	20.25	17.24	26.44	427	321	354	417	328	349	290	353	312	377	298	310	387
OS08G0174800	36.21	70.66	45.6	42.57	64.47	62.92	17.69	18.79	37.56	41.81	35.86	52.26	15.95	17.38	20.25	50.16	63.44	59.89	43.87	67.61	60.55	44.94	71.35	67.27	22.66	21.81	33.95	44.15	35.4	51.62	27.76	34.28	22.41	57.03	55.17	56.03	1105	1758	1353	1267	2005	1864	477	578	1001	1257	1108	1271	511
OS08G0198700	115.03	163.22	141.34	117.31	88.88	184.05	203.37	151.88	289.81	171.01	107.14	309.17	137.52	56.49	146.08	155.03	32.94	136.44	150.91	260.43	153.35	118.87	102.17	163.89	225.73	132.19	209.98	225.42	52.15	177.04	120.7	41.69	211.52	95.26	42.1	106.31	1476	1770	1850	1498	1212	2439	2406	2110	3659	2012	1373	3752	1656
OS08G0202400	0.43	1.23	0.41	1.43	2.18	2.07	0.6	0.88	0.77	1.16	1.54	1.1	1.3	2.21	1.54	2.92	8.69	6.13	0.36	0.42	0.54	0.81	1.86	0.86	1.32	0.69	0.85	0.91	2.16	1.27	1.24	4.58	0.63	4.11	12.48	5.4	13	32	13	43	70	65	17	29	23	33	47	32	38
OS08G0205100	1.89	2.62	1.79	3.02	2.27	4.26	3.47	4.09	4.6	4.02	3.04	2.82	5.42	4.27	6.16	3.17	3.98	5.17	3.73	3.17	3.6	3.25	4.58	4.2	4.65	3.77	4.92	4.47	4.21	4.65	7.26	6.16	6.53	4.79	3.65	6.92	58	69	57	92	73.87	136	99.44	136.87	140	116	94.16	83	160
OS08G0224200	42.14	47.62	38.65	55.29	53.86	47.86	45.53	49.71	46.97	57.14	57.23	55.89	59.21	54.34	54.97	62.48	52.08	63.05	51.84	69.5	57.8	65.6	83.78	60.86	54.96	75.93	64.65	64.38	77.23	62.07	57.89	60.53	67.01	72.26	73.48	90.4	939	931	858	1273	1313	1004	942	1260	902	1250	1342	936	1325
OS08G0247600	0.47	3.54	0.45	1.64	3.18	1.08	0.44	2.27	0.5	0.53	1.36	0.29	1.98	1.93	2.82	1.98	5.18	3.59	0.3	3.58	1.95	1.35	4.9	1.87	1.53	2.78	1.17	2.58	3.68	1.39	4.18	4.13	4.01	5.69	6.85	6.68	15	97	15	52	108	36	13	79	16	16	44	9	61
OS08G0278100	1.35	1.92	2.32	2.12	1.34	2.67	1.29	2.62	2.42	3.19	2.53	2.9	4.83	4.95	6.77	4.84	2.76	4	1.62	2.23	1.38	3.44	2.54	3.22	3	3.41	3.17	2.31	3.13	2.18	5.62	4.96	7.01	4.25	2.02	3.24	18	22	32	28	19	37	16	38	32	40	34	37	62
OS08G0387700	3.7	2.46	2.04	10.49	5.43	5.31	13.52	10.08	7.94	10.78	8.14	8.05	10.07	7.41	12.25	6.88	7.43	8.17	4.98	5.16	2.56	10.53	7.81	3.55	13.25	8.22	8.06	14.4	13.57	12.18	9.94	7.94	10.81	9.2	2.91	10.55	92	45	61	272	145	117	286	241	184	275	198	200	237
OS08G0398350	0.24	0.8	0.23	0.41	0.46	1.56	0.56	0.3	0.78	10.52	9.65	11.08	0.63	0.11	3.05	23.82	4.36	33.11	0.11	1.16	0.46	0.14	0.69	1.19	0	0.12	0.19	4.76	1.88	2.6	0.23	0.99	1.75	15.87	8.61	11.94	6	17	6	10	12	40	13	8	19	244	240	262	15
OS08G0411850	0	0	0	0	0	0	0	0	0	0	0	0	0	0	0	0	0	0	2.63	10.64	6.06	3.4	4.44	5.78	6.41	4.25	3.71	4.82	6.72	5.02	5.43	5.69	3.87	5.73	2.5	7.03	0	0	0	0	0	0	0	0	0	0	0	0	0
OS08G0411900	0	0	0.05	0	0	0	0	0	0	0	0	0	0	0	0	0	0	0	1.82	2.06	3.26	1.95	2.01	4.21	2.75	2.2	2.66	4.37	2	4.09	2.39	2.35	5.05	3.83	3.27	5.56	0	0	1	0	0	0	0	0	0	0	0	0	0
OS08G0412100	1.44	1.02	1.26	1.8	1.41	1.47	2.03	1.17	2.03	2.53	1.63	2.16	5.12	3.13	3.82	4.46	2.76	4.04	0.99	1.08	1.77	1.7	1.85	1.92	2.04	1.72	2.23	1.77	1.34	2.2	3.76	2.09	2.68	3	2.32	3.34	51	31	46	63	53	54	67	45	71	84	58	73	174
OS08G0434100	3.56	12.28	10.74	3.07	29.89	4.77	0.37	0.64	0.88	0.37	0.6	1.45	0	0.53	1.02	0.59	5.87	1.11	1.88	11.35	3.65	1.92	9.52	4.32	0.09	1.07	0.51	0.29	2.55	0.27	0.1	2.79	0.31	0.76	20.59	0.71	41	121	128	35	365	57	4	8	10	4	7	16	0
OS08G0450100	0	0	0.15	0.05	0.37	0	0	0.1	0	0.11	2.43	0.06	0.39	0.56	0	0	3.91	0.06	0.07	1.24	0	0	1.98	0.24	0.05	0.05	0.06	0.84	2.32	0	0.18	0.4	0.06	0.58	2.72	0.06	0	0	3	1	7.31	0	0	2	0	2	46	1	7
OS08G0460600	18.54	18.64	11.25	22.89	14.04	12.34	29.88	25.84	17.32	41.32	50.28	41.2	29.3	21.93	21.67	44.36	23.97	39.24	21.59	25.02	17.56	22.64	22.78	11.63	29.73	43.38	17.31	52.12	42.77	36.08	15.7	13.51	25.4	32.29	16.65	32.29	309.44	266.48	194.33	378.24	248.74	213.79	464.74	469.29	286.46	647.83	844.92	658.09	469.92
OS08G0478800	8.86	10.63	11.9	9.04	5.64	8.87	4.09	6	7.79	6.74	4.52	6.67	7.88	3.4	7.73	8.64	6.94	11.04	7.69	10.2	10.7	7.51	4.02	8.17	6.19	2.25	4.94	6.11	1.93	5.49	6.35	2.99	5.82	7.89	2.8	6.43	179	184	249	181	121	186	77	132	156	128	92	129	153
OS08G0498600	0.11	0.13	0	0.05	0	0	0.06	0	0.05	0.17	0.11	0.11	0.28	0.22	0.23	0.17	0.05	0.13	2.48	2.06	3.54	0.77	1.16	2.99	0.43	0.31	0.76	0.51	0.26	0.45	0.99	0.87	0.45	1.18	1.38	0.66	2	2	0	1	0	0	1	0	1	3	2	2	5
OS08G0509600	2.14	2.57	2.68	1.72	1.66	2.24	0.81	0.98	1.14	0.94	1.31	0.79	0.79	0.77	0.8	0.64	0.59	0.8	1.45	2.21	2.45	1.83	1.71	1.78	1.39	1.73	1.63	1.31	1.14	1.7	0.79	0.6	0.6	1.51	0.42	0.81	34	35	44	27	28	37	12	17	18	14	21	12	12
OS08G0513300	3.84	4.57	6.37	6.25	6.09	8.69	6.34	13.34	10.61	4.9	9.13	6.97	16.97	26.13	21.23	12.78	12.9	15.87	5.03	5.4	6.69	8.67	5.9	7.8	6.15	11.81	7.1	6.05	10.6	6.85	21.1	29.75	21.19	15.04	7.4	18.02	57	57	96	90	94	132	86	212	153	67	136	97	238
OS08G0539300	13.04	8.82	12.12	12.3	8.9	9.04	8.95	8.4	7.99	9.73	6.72	7.06	15.47	11.44	10.61	9.94	9.01	8.35	13.66	8.09	8.62	14.72	9.91	8.81	9.63	9.76	9.16	7.88	7.87	7.45	15.5	11.4	9.57	10.84	5.41	7.2	214	124	206	200	155	154	137	150	130	150	111	111	244
OS08G0539700	84.09	175.13	22.64	122.72	101.59	90.05	197.03	174.3	141.05	258.33	270.19	243.61	266.04	109.47	161.7	395.24	162.45	325.81	31.17	108.66	8.92	62.97	68.17	19.26	52.33	77.12	25.77	78.04	88.28	32.5	98.81	45.05	36.99	177.03	63.7	45.32	2286	3872	559	3358	2963	2387	4893	4808	3472	6836	7436	5873	6922
OS08G0542700	2.79	2.45	2.73	7.37	9.33	5.67	13.5	18.67	8.25	6.56	11.3	7.74	12.32	23.23	14	5.68	3.46	6	2.97	2.68	1.5	5.81	8.45	4.18	12.78	15.06	7.73	5.86	16	8.27	12.59	19.2	11.29	3.02	4.21	5.9	74.64	56	75.53	194.97	264.47	157.39	336.18	542.92	218.47	164.55	304	197.93	316.34
OS08G0561700	16.46	16.22	20.18	15.62	33.98	24.68	18.08	24.81	20.38	18.99	26.33	22.03	36.71	86.82	32.45	30.82	84.36	29.3	21.96	25.33	17.27	18.43	32.82	12.81	16.27	25.6	11.57	21.62	43.15	11.55	58.2	176.06	22.69	24.1	81.19	20.3	167	141	212	157	366	260	171	274	205	181	269	214	358
OS09G0124800	1.03	0.77	0.93	0.55	0.74	1.05	0.78	1.05	1.4	0.83	0.78	1.39	1.44	0.84	0.83	0.82	0.41	1.75	2.44	2.69	1.92	1.76	1.57	1.98	3.02	2.34	2.41	1.96	1.83	2.63	2.53	1.6	3.62	1.65	2.03	3.11	17	11	16	9	13	18	12	19	23	13	13	22	23
OS09G0237600	9.22	11.95	7.51	21.18	24.64	16.43	15.39	24.79	13.26	16.88	16.31	12.81	22.42	31.1	25.57	20.91	21.78	22.24	12.8	13.22	13.21	22.23	31.25	19.21	18.46	23.54	21.66	15.5	26.41	16.05	22.96	31.4	27.21	21.8	23.05	35.19	146	162	123	332	414	270	227	427	208	251	260	194	341
OS09G0246300	0.57	1.53	0.55	0.71	0.41	0.88	2.21	0.8	1.16	12.21	3.66	4.46	0.6	0.13	0.6	2.11	3.15	0.16	0.96	1.05	0.15	0.68	0	0.5	3.76	2.72	2.08	5.59	1.57	2.08	0.8	2.76	0.56	1.39	3.74	0.72	4	9	4	5	3	6	14	6	8	80	25	30	4
OS09G0274900	33.46	52.02	44.04	45.52	66.65	62.95	30.69	147.51	30.08	31	61.99	17.21	48.35	101.93	67.59	25.15	78.88	43.5	41.67	68.32	7.46	83.33	118.24	18.81	96.81	123.12	30.74	43.82	126.14	36.85	101.6	169.21	54.9	77.81	80.75	46.46	193	257	263	260	408	377	165	926	172	168	360	95	268
OS09G0281900	12.65	14.5	15.69	14.3	11.71	14.65	11.24	12.72	13.98	15.54	14.56	14.51	14.82	11.45	16.23	12.76	10.77	14.07	13.1	14.84	18.03	14.68	14.95	21.54	14.06	13.68	17.21	13.85	12.62	17.74	14.05	13.82	14.53	14.11	10.91	14.35	528	507	671	601	521	594	424	577	544	678	654	545	655
OS09G0392666	105.05	118.87	121.42	226.66	217.07	286.64	416.89	307.07	561.56	322.98	309.71	715.4	209.5	206.45	291.46	226.3	204.39	246.96	114.51	210.58	90.84	110.96	90.02	64.07	325.63	294.39	126.06	487.75	233.55	251.2	223.56	145.33	228.52	139.67	110.03	169.59	1099	1065	1315	2348	2410	3113	4065	3496	5823	3174	3262	7163	2106
OS09G0420900	2.9	2.72	3.51	1.16	0.96	1.85	1.45	2.33	2.06	1.74	1.79	1.71	3.27	2.31	2.08	1.25	1.68	1.19	4.96	4.64	3.94	5.44	2.44	2.54	4.25	3.52	2.64	3.78	2.95	1.82	2	2.01	2.3	3.88	2.47	1.1	71	57	89	28	25	47	33	62	50	40	44	40	77
OS09G0491740	88.19	13.29	38.93	215.65	18.95	89.7	593.03	158.63	416.63	366.39	233.24	446.56	134.13	107.1	158.99	147.69	36.6	127.53	66.44	5.79	17.13	62.52	7.19	30.52	192.1	53.85	154.64	133.66	60.41	234.17	52.27	32.15	71.78	52.73	30.65	63.55	2022	261	924	4896	461	2135	12673	3958	9468	7891	5384	9799	2955
OS09G0497400	114.94	103.81	115.72	148.09	102.13	128.28	172.16	178.56	195.14	166.33	152.34	148.99	149.61	144.97	175.64	125.99	117.28	153.87	116.06	107.4	119.49	149.22	129.9	129.41	177.31	158.2	194.99	161.07	150.9	174.61	156.87	132.96	198.63	136.99	104.21	136.41	1280	990	1334	1633	1207	1483	1787	2164	2154	1740	1708	1588	1601
OS09G0507100	1.23	0.25	0.63	0.36	0	0.56	0.15	0.33	0.07	0	0	0.3	0.23	0.13	0.15	0.49	0.31	0.17	2.92	1.3	1.11	1.34	1.22	0.57	1.37	0.21	0.51	0.54	0.68	0.67	0.74	0.48	1.12	1.26	0.87	0.25	17	3	9	5	0	8	2	5	1	0	0	4	3
OS09G0517100	6.86	21.95	16.52	8.32	24.61	14.62	6.43	8.66	8.94	4.4	7.55	6.04	7.17	17.39	8.42	3.55	10.66	4.99	9.31	19.9	15.77	5.69	15.12	15.14	3.39	4.28	4.69	2.43	5.15	3.04	6.83	12.76	5	4.24	14.53	7.31	265	734	672	308	984	580	221	350	330	151	281	218	253
OS09G0517200	0.07	0.04	0.03	0.11	0.03	0.61	0.45	0.13	1.24	0.52	0.17	0.66	1.17	0.24	0.37	2.58	0.66	0.41	0.09	0.19	0.32	0.06	0	0.24	0.18	0.2	0.16	0.12	0.07	0.15	0.52	2.19	0.46	0.99	9.15	2.58	2	1	1	3	1	18	12	4	35	14	5	18	32
OS09G0521700	3.16	3.4	3.28	2.7	2.83	1.69	2.86	2.99	3.89	2.49	2.24	2.71	3.3	2.45	4.67	3.11	1.92	3.77	3.48	3.71	4.1	3.38	5.36	4.41	3.9	3.3	5.58	4.63	2.86	4.32	3.32	2.13	4.31	2.83	1.46	4.37	37	34	38	32	36	20	31	39	42	28	27	31	38
OS09G0539200	0.82	0.88	1.75	1.89	1.41	2.69	1.9	1.85	1.48	1.56	1.9	1.14	1.17	0.89	2.39	1	0.73	2.14	0.6	1.2	0.49	1.2	1.12	1.27	1.71	0.45	1.52	1.59	0.91	1.84	1.74	0.58	1.51	0.82	0.46	2	24	22	53	55	44	82	52	59	43	43	56	32	33
OS09G0570900	2.74	4.17	3.66	5.3	6.48	6.71	6.95	8.73	9.64	4.2	9.44	4.68	8.67	13.72	8.76	6.57	10.09	4.49	4.43	8.48	4.19	6.03	11.74	7.57	10.47	12.05	7.26	5.86	9.31	5.46	17.54	18.45	10.45	9.11	13.94	6.21	56	66	75	101	131	143	128	188	186	75	183	85	160
OS09G0572400	13.83	17.32	16.43	16.9	18.15	18.96	20.02	17.74	18.48	24.76	26.05	23.3	23.77	17.6	20.03	29.03	21.91	29.31	12.93	14.64	13.48	13.41	12.66	17.21	14.47	12.93	15.79	21.23	14.05	19.39	10.91	12.87	17.92	22.83	26.89	22.21	328.14	352	403.69	397	457	467	442.77	458	434.55	551.87	622.4	529.25	541.95
OS10G0113000	0.65	0	0.08	0.67	0.08	0	0.54	1.94	0.08	0.51	1.76	0	11.57	34.59	8.23	1.72	13.26	5.58	2.23	1.34	3.28	5.72	5.61	1.66	18.13	13.1	4.65	22.21	31.61	12.93	24.12	37.42	18.8	16.56	23.93	21.69	7.77	0	1	7.92	1	0	6	25	1	5.74	21	0	132
OS10G0113100	40.68	24.49	34.38	39.54	56.61	39.77	16.69	20.93	19.83	19.76	21.21	28.29	18.78	84.98	31.06	41.58	191.99	79.1	1.58	2.5	6.52	9.54	8.44	5.85	23.32	21.13	15.56	16.22	16.62	21.36	37.67	63.99	28.56	15.17	48.71	32.21	480	247	420	462	709	487.24	183.61	268.78	232	219	252	319.49	213
OS10G0118900	15.95	31.78	17.43	28.14	38.15	34.02	20.83	16.15	22.72	23.5	19.52	24.69	24.33	19.94	24.05	29.46	32.3	30.47	18.51	34.67	25.68	22.38	46.09	25.56	18.11	24.77	18.82	25.2	30.99	21.44	20.63	22.35	27.4	33.21	36.32	39.64	177	299	198	306	447	389	213	194	249	244	217	259	260
OS10G0132700	13.29	12.45	12.93	18.33	12.89	16.3	25.8	21.88	24.16	26.22	22.4	25.69	17.02	12.64	28.87	18.84	9.06	23.29	18.43	21.1	18.57	22.47	18.26	25.65	28.65	23.64	36.03	32.95	17.94	32.58	17.71	12.71	35.68	15.9	11.73	22.84	340.19	273.08	342.76	464.74	350.24	433.42	615.88	609.81	613.07	630.59	577.49	629.52	418.85
OS10G0142100	21.17	22.76	29.63	19.35	17.11	31.52	42.64	37.05	61.73	61.5	48.78	83.51	52.34	25.54	56.84	46.99	14.44	36.47	12.33	25.47	24.33	14.24	15.89	24.13	56.89	34.1	46.58	53.64	45.35	51.63	51.76	35.15	61.75	30.53	12.7	29.23	200	231	341	227	200	350	471	410	602	629	582	702	596
OS10G0370100	7.53	10	8.34	12.35	8.19	10.27	11.78	11.22	11.31	11.53	11.42	12.47	11.81	9.52	11.51	10.99	7.37	12.36	11.98	11.89	10.03	12.15	12.29	14.4	12.8	11.02	13.04	11.78	7.48	13.27	10.71	10.5	12.21	9.36	6.41	10.66	281	300	307	446	334	385	396	463	390	416	433	408	455
OS10G0370400	2.67	2.95	2.31	4.28	4.69	4.3	3.71	5.9	4.44	3.85	4.67	2.9	6.48	5.49	4.91	4.07	4.74	6.03	2.9	3.61	2.62	4.68	7.77	4.09	5.09	6.16	4.73	4.72	5.66	4.88	8.25	7.66	4.63	5.7	4.43	5.35	98	93	88	156	183	164	127	236	162	133	173	102	229
OS10G0469100	0.27	0.22	0.54	0.54	0.17	0	0.26	0.95	0	0.2	0	0	0	0.35	0	0.21	0	0.64	0	0.2	0.84	0.14	0.37	0.91	0.15	0.18	1.13	0.86	0.66	0	0.79	0.53	0.22	0.61	0.32	1.41	9	1	9	8	6	0	8	15	0	1	0	0	0
OS10G0480200	8.91	10.93	12.61	7.85	10.28	8.79	5.32	8.65	6.97	9.01	9.07	10.82	6.09	8.35	8	10.3	16.9	17.83	11.78	20.29	9.55	12.28	16.79	8.58	8.71	8.53	6.3	9.8	8.33	7.14	8.62	10.25	7.25	16.91	19.93	14.76	249.98	258	341	201	303	231	135	263	166.96	238	254.98	254	174
OS10G0502600	7.93	6.06	8.24	7.38	10.14	9.56	10.82	9.18	9.99	6.58	6.76	6.4	9.04	10.55	8.95	4.23	3.91	6.83	6.66	5.98	12.86	6.8	6.8	10.98	9.31	9.64	8.69	18.16	10.3	7.52	14.87	11.24	10.44	6.44	6.07	7.81	93	73	113	86	126	129	115	119	106	73	76	76	100
OS10G0558900	1.52	0.89	0.81	1.02	0.87	0.81	1.63	3.17	0.93	0.9	1.51	1.5	2.45	2.35	2.06	1.62	1.37	1.37	1.25	1.88	0.35	0.97	1.81	0.86	3.63	2.96	0.59	2.25	3.12	1.57	4.5	4.62	1.01	2.12	2.5	2.37	18	9	10	12	11	10	18	41	11	10	18	17	28
OS10G0575200	28.53	28.76	29.32	35.14	26.14	31.94	30.08	31.68	27.79	37.48	28.81	30.68	47.73	30.34	38.6	46.5	25.9	38.97	32.77	36.57	33.39	35.74	27.46	34.13	33.72	27.42	32.72	33.86	21.91	29.44	48.35	27.93	45.28	34.52	26.67	39.09	918	758	922	1170	866	941	885	1063	819	1203	976	843	1863
OS11G0116000	181.87	332.88	277.48	75.87	381.8	139.5	3.78	54.08	10.34	20.42	113.19	23.09	12.1	62.98	23.61	31.57	293.77	71.57	107.92	831.61	302.51	85.06	482.92	147.25	20.78	94.48	22.32	95.77	416.87	71.44	26.97	128.01	37.02	152.97	384.26	135.18	1650.11	2586.51	2606.3	681.63	3676.29	1314	32	534	93	174	1034	200.52	105.51
OS11G0170400	5.31	5.91	8.55	9.04	6.42	10.75	10.91	8.49	11.35	10.23	6.2	11.2	13.36	6.64	10.19	10.7	4.99	10.29	5.46	9.01	9.38	8.15	7.72	9.91	13.69	8.5	10.5	10.54	5.38	10.23	11.25	7.02	14.43	7.68	4.35	8.53	153.2	147.25	251.54	259.78	197.76	322.27	294.77	271.37	327.44	279.56	184.16	303.8	386.48
OS11G0222900	19.79	11.98	15.28	16.33	9.58	16.5	15.69	14.69	18.54	15.36	9.46	14.44	22.26	11.02	25.85	17.91	6	18.45	35.17	18.73	48.51	36.55	20.97	59.29	27.1	19.46	36.63	29.52	15.88	39.6	38.99	19.43	36.59	24.21	8.94	24.56	688.16	358.56	551.9	560.81	352.76	597.46	511.66	558.84	640.09	502.53	333.77	483.46	737.93
OS11G0223201	3.15	2.21	2.45	3.9	2.15	2.32	3.21	3.18	2.7	4.45	2.93	2.08	6.12	2.87	4.11	4.14	3.04	6.14	4.65	1.59	5.27	4.64	2.35	7.68	4.55	1.42	6.82	4.09	1.5	6.88	2.67	2.47	4.68	3.5	2.8	3.83	132.84	80	107	163	96.08	101.67	126.08	145.97	113	176.43	124.42	84	248
OS11G0223400	14.39	11.84	10.87	19.2	10.54	23.34	21.51	12.12	27.68	15.63	13.4	28.9	14.35	12.64	13.54	19.52	13.64	15.85	18.12	14.97	15.44	19.13	15.15	18.37	18.2	15.69	19.96	15.49	10.62	17.39	13.89	13.52	15.65	12.94	9.33	13.17	193	136	151	255	150	325	269	177	368	197	181	371	185
OS11G0225100	12.99	12.46	13.66	14.98	11.25	13.07	12.75	10.82	11.38	15	11.97	8.99	12.71	9.45	12.95	9.5	8.35	13.9	11.06	7.76	9.5	12.6	9.93	12.84	14.54	12.52	15.15	13.25	12.18	15.92	14.69	10.39	11.74	10.3	6.68	8.36	471	387	513	538	433	492	431	427	409	511	437	312	443
OS11G0225300	0	0	0	0	0	0	0	0	0	0	0	0	0	0	0	0.13	0	0	3.59	4.59	3.27	4.3	5.37	4.64	5.44	5.17	4.68	5.12	4.63	4.86	5.29	5.43	5.91	4.61	4.91	5.91	0	0	0	0	0	0	0	0	0	0	0	0	0
OS11G0226400	0	0	0	0	0	0	0	0	0	0	0	0	0	0	0	0	0	0	5.41	7.22	5.4	6.98	7.66	6.08	5.32	5.9	6.09	5.48	4.6	4.51	5.74	4.97	6.05	5.44	4.59	6.48	0	0	0	0	0	0	0	0	0	0	0	0	0
OS11G0226700	0	0	0	0	0	0	0	0	0	0.02	0	0	0	0	0	0	0	0	0.85	1.48	1.1	1.25	1.65	0.95	2.05	2.07	1.07	1.65	1.77	2	2.3	1.52	1.53	1.98	1.28	1.17	0	0	0	0	0	0	0	0	0	1	0	0	0
OS11G0237600	1.93	2.59	2.68	3.59	3.09	4.42	2.68	5.1	3.78	4.02	3.47	4.07	4.45	5.29	4.77	3.39	3.44	5.44	2.78	4.11	4.06	3.3	4.44	4.16	4.09	4.79	4.43	4.03	4.33	4.85	4.18	5.01	5.76	3.78	3.53	5.8	62	71	89	114	105	147	80	178	120	121	112	125	137
OS11G0237900	0.37	0.34	0.57	0.48	0.59	0.39	0.47	0.54	0.85	0.04	0.18	0.34	0.69	0.86	0.9	0.33	0.19	0.21	0.45	1.09	0.83	0.74	0.7	0.7	0.48	0.52	0.26	0.34	0.35	0.53	0.71	0.55	0.79	0.2	0.2	0.13	10	8	16	13	17	11	12	16	23	1	5	9	18
OS11G0258500	0.4	0.31	0.34	0.41	0.09	0.17	0.38	0.18	0.67	0.22	0.22	0.31	0.32	0.32	0.62	0.39	0.08	0.37	0.3	0.32	0.28	0.2	0.05	0.45	0.73	0.18	0.11	0.29	0.19	0.26	0.05	0.19	0.75	0.14	0.06	0.25	11.4	7.67	10.14	11.6	2.72	4.93	10	5.59	18.97	5.79	6.29	8.53	8.85
OS11G0265900	2.23	1.62	1.53	3.61	2.41	4.02	2.51	4.14	3.64	1.97	2.96	1.79	4.72	5.49	4.82	3.13	2.61	3.39	2.18	2.13	2.27	4.2	3.11	3.35	4.22	4.27	2.58	2.16	3.35	2.88	5.57	7.57	3.75	2.84	3.79	3.45	69	43	49	114	79	130	73	140	114	58	93	53	142
OS11G0266500	3.72	2.78	2.86	3.53	2.2	8.19	5.14	4.42	10.29	6.14	3.51	9.22	15.94	7.97	14.59	10.28	4.89	11.49	4.08	3.43	9.65	4.58	1.98	7.28	5.69	4.87	8.6	7.25	3.22	6.51	14.2	9.28	10.06	7.91	4.77	9.74	118	73	93	110	74	269	152	151	322	179	107	276	475
OS11G0303500	16.3	19.72	16.55	20.03	15.91	16.59	21.87	18.73	16.27	22.41	20.7	18.26	21.03	14.06	22.23	21.24	11.02	23.92	21.1	20.53	22.96	23.92	20.87	26.84	24.31	21.52	26.9	26.21	19.2	28.82	22	18.62	27.33	19.96	16.16	23.51	387	401	407	471	401	409	484	484	383	500	495	415	480
OS11G0441900	0.27	0.16	0	0.41	0.63	0.65	0	1.05	0	0.43	1.07	0	0.14	1.46	0.21	0.46	0.29	0.55	0.09	0.29	0.14	0.3	0.83	0.38	0.2	0.06	0.47	0.39	0.89	0.28	0.3	0.51	0.56	0.29	0.54	0.63	4	2	0	6	10	10	0	17	0	6	16	0	2
OS11G0462900	0.29	0.15	0.38	0.59	0.48	0.34	0.3	0.79	1.01	0.46	0.48	0.79	1.39	0.78	1.71	0.84	0.63	1.52	0.53	0.44	0.76	0.97	0.79	0.84	0.85	1.32	1.03	1.15	0.99	1.11	1.42	1.91	2.09	1.69	1.01	1.73	13.49	6.07	18.3	27	23.87	16.28	13	40	46.39	20.3	22.58	35	62
OS11G0480000	0.37	0.39	0.5	0.11	0.62	0.57	0.67	0.24	0.67	0.51	0.58	0.34	0.23	0.41	0.94	0.5	0.38	0.13	0.35	1.13	0.64	0.19	1.16	0.75	1.03	0.56	0.56	0.67	0.84	0.72	0.58	0.83	0.35	0.56	0.39	0.39	10	9	14	3	18	16	17	7	18	13	16	9	6
OS11G0496600	2.34	3.17	1.99	2.55	1.5	2.34	0.7	1.63	1.79	1.69	2.04	1.27	1.36	1.95	2.09	1.91	2	1.41	5.68	3.67	3.74	5.11	2.74	2.54	2.81	3.63	2.42	2.34	3.2	2.52	3.29	2.21	2.36	1.63	2.64	1.64	25	29	22	27	17	26	7	19	19	17	22	13	14
OS11G0543500	1.37	0.51	2.76	0.38	0.18	1.14	0.07	0	0.06	0	0	0	0	0.7	0.07	0	0.32	0	3.86	5.15	12.31	1.7	1.26	6.33	0.37	0.29	0.22	0.05	0	0.06	1.06	2.76	0.07	0.41	3.43	0	22	7	46	6	3	19	1	0	1	0	0	0	0
OS11G0550100	0.23	0.33	0.11	0.23	0.48	0.27	0.6	0.26	0.34	0.48	0.45	0.24	1.17	0.59	0.78	0.26	0.72	0.65	0.99	0.54	1.73	0.55	0.51	0.89	0.84	0.59	0.59	1.08	1.18	0.76	1.66	1.49	1.22	1.17	2.43	1.19	4	5	2	4	9	5	10	5	6	8	8	4	20
OS11G0550500	2.78	3.58	1.93	6.6	2.83	6.3	8.92	5.29	6.03	8.06	5.96	5.65	13.44	6.31	10.66	14.88	6.9	11.59	3.21	2.39	2.53	3.56	2.33	2.01	6.38	2.34	2.53	4.7	2.05	2.46	8.6	4.08	3.04	7.65	3.37	4.5	89	98	64	209	96	209	266	184	191	242	192	173	413
OS11G0588600	28.68	30.15	36.57	28.75	24.43	33.39	24.36	25.92	24.7	25.05	21.33	22.38	22.56	22.17	26.83	13.35	13.04	17.45	24.76	27.81	35.65	27.92	24.02	40	29.96	20.24	28.45	29.65	17.37	27.15	32.13	25.15	29.15	17.13	13.85	18.18	1114.98	1004	1471.96	1107	1007.98	1348	883	1097	951.99	914.97	835	833	843
OS11G0604900	0	0	0	0	0	0	0	0	0	0	0	0	0	0.03	0	0	0	0.04	23.67	33.89	22.88	23.97	23.77	26.58	16.48	26.78	15.2	25.7	25.82	21.94	37.64	23.19	31.82	33.98	10.69	24.56	0	0	0	0	0	0	0	0	0	0	0	0	0
OS11G0606500	0	0	0	0	0	0	0	0	0	0	0	0	0	0	0	0	0	0	12.49	7.83	7.91	8.82	5.96	7.73	6.03	3.58	3.49	3.81	2.97	1.88	8.73	6.14	3.86	7.47	4.16	2.67	0	0	0	0	0	0	0	0	0	0	0	0	0
OS11G0611100	4.23	2.7	3.22	2.98	1.69	2.97	2.07	1.65	2.33	1.37	2.68	2.55	2.14	3.01	2.05	3.34	2.2	3.43	1.91	1.91	1.58	1.25	0.72	1.45	2.18	0.97	0.75	0.64	1.95	0.8	2.04	1.94	0.92	2.66	0.86	1.65	33	18	26	23	14	24	15	14	18	10	21	19	16
OS11G0629400	2.25	8.72	8.71	1.14	7.17	4.34	0.45	0.39	1.28	1.5	1.26	0.59	0.29	0.37	0.3	0.16	5.3	0	4.95	11.52	7.8	3.11	10.5	5.73	0	1.34	2.48	0.35	1.74	0.73	0.64	4.26	1.01	4.92	6.45	1.15	16	53	64	8	54	32	3	3	9	10	9	4	2
OS11G0629550	1.17	1.38	0.92	0.8	0.48	0.98	1.38	0.87	1.12	0.91	0.76	0.44	1.43	1.01	2.81	1.14	0.95	1.66	1.75	0.68	2.24	3.01	2.02	3.15	3.35	1.59	2.7	3.51	1.14	3.13	2.85	1.81	2.03	1.64	1.14	1.25	27.62	27.8	22.39	18.59	11.91	24.02	30.33	22.31	26.09	20.11	17.93	9.94	32.43
OS11G0654800	0.99	0.85	0.85	0.52	1.41	0.85	0.67	0.61	0.89	1.29	0.65	0.73	0.99	0.38	0.93	0.75	0.88	0.89	0.74	1.44	1.01	0.42	0.87	0.83	0.99	1.39	1.76	0.85	1.15	1.06	0.83	0.69	0.31	1.4	0.34	0.73	27	20	24	14	41	24	17	18	24	33	18	19	26
OS11G0668100	5.21	5.07	4.89	9.68	7.41	7.96	9.98	8.65	8.73	7	5.14	6.23	7.33	7.28	7.82	4.76	4.15	5.76	3.83	3.97	3.68	4.05	6.08	4.55	8.16	5.41	5.44	5.57	5.15	5.88	7.79	6.82	5.04	5.06	4.3	5.38	145	121	141	267	219	230	259	262	241	183	144	166	196
OS11G0684100	8.37	14.24	8.96	10.26	11.62	11.55	5.5	6.4	8.83	9.47	8.68	8.16	9.71	7.45	8.51	11.53	10.79	12.66	3.25	4.67	6.41	4.47	4.44	5.98	3.47	3.15	4.59	4.95	2.88	5.88	5.57	4.62	5.81	5.83	4.16	6.4	360	519.8	398.66	436.58	522.68	510.41	217.38	303.84	378.47	376.79	369.24	336.88	402.47
OS11G0684700	6.03	6.34	3.99	11.92	9.66	9.61	13.24	11.98	11.43	14.41	12.38	11.54	15.8	13.37	13.95	14.23	10.34	13.31	7.29	6.6	6.7	11.22	12.58	8.7	13.33	9.52	12.6	13.56	13.22	13.84	20.11	16.37	12.15	15.58	12.62	14.74	191	172	131	374	325	316	391	413	359	429	395	350	481
OS11G0686400	1.63	3.37	1.92	7.41	5.63	4.63	8.95	8.74	10.03	8.54	10.67	10.55	10.45	9.33	11.3	10.28	9.16	11.48	1.87	2.8	2.17	2.27	3.83	2.31	3.4	3.26	2.38	3.7	3.36	2.54	5.51	5.26	3.59	4.96	6.29	6.95	47	83.2	57.34	211.42	172.32	138.59	240.62	274.16	286.53	231.36	309.76	291.12	289.53
OS11G0686500	1.24	2.74	1.22	3.18	4.21	1.95	3.24	4.43	4.19	2.78	4.82	2.98	4.46	4.85	4.24	3.08	5.23	4.07	0.98	2.29	0.88	1.35	3.1	1.1	1.97	1.81	2.15	1.73	1.89	1.37	3.34	3.54	1.58	2.41	2.57	1.92	46	87	47	117	166	75	112	179	154	97	180	106	159
OS12G0115300	76.01	226.19	148.22	43.76	281.87	68.84	5.79	70.3	9.92	6	28.7	5.07	11.42	41.72	16.23	11.72	49.8	26.33	60.24	381.39	151.65	58.6	327.52	103.68	26.95	86.29	32.19	27.05	96.86	28.6	33.03	94.59	35.38	31.69	86.59	44.48	633.89	1615.49	1279.7	361.37	2494.71	596	45	638	82	47	241	40.48	91.49
OS12G0131100	12.87	11.47	8.67	43.61	37.42	41.92	51.51	52.05	49.8	27.49	30.19	30.25	47.32	64.22	56.31	30.32	15.64	22.03	13.26	15.47	11.54	27.78	52.3	30.34	34.4	40.06	41.46	17.02	38.45	21.16	45.49	49.6	47.84	16.46	24.62	32.4	152	116	106	510	469	514	567	669	583	305	359	342	537
OS12G0131150	0.41	0	0	2.92	0.78	0	0.44	0.38	0	0	0	0	0	1.43	0	0	0	0	0	0.88	0.85	0	3.73	0.47	0.83	0	0.48	0.69	0	0	0.47	1.17	0.49	0	0	0.48	1	0	0	7	2	0	1	1	0	0	0	0	0
OS12G0237900	1.93	0.59	0.34	3.29	2.62	0.58	2.14	2.58	0.67	2.25	2.98	0.46	4.6	3.63	1.48	2.54	3.68	1.76	0.6	1.28	0.39	2.48	4.75	0.18	3.35	2.19	1.08	3.45	3.51	1.18	4.95	2.54	1.63	7.07	4.51	1.77	61	16	11	103	88	19	63	89	21	67	95	14	140
OS12G0270300	2.46	3.08	3.98	2.43	4.68	4.96	0.78	1.47	1.61	2.12	1.82	1.91	2.03	4.08	3.69	2.19	3.01	2.35	2.88	6.76	5.56	3.56	7.03	5.62	1.9	1.53	2.12	3.14	2.64	1.53	2.62	4.47	3.17	3.17	4.06	3.12	82	89	139	74	165	174	22	50	54	63	62	55	66
OS12G0273300	0.16	0.12	0.13	0.2	0.09	0.19	0.6	0.55	0.3	0.77	0.46	0.21	0.96	0.83	0.91	1.23	0.59	0.65	0.09	0.14	0.14	0.35	0.41	0.52	0.53	0.31	0.15	0.63	0.63	0.24	0.86	0.44	0.91	0.61	0.93	0.81	5	3	4	6	3	6	17	18	9	22	14	6	28
OS12G0281600	0.57	1.31	0.82	1.08	2.73	1.29	1.66	1.25	2.29	3.08	2.94	2.26	2.63	1.63	1.73	2.56	2.89	2.73	0.58	2.24	1.24	1.29	1.51	1.62	1.33	1.26	1.79	1.87	2.94	2.44	2.39	1.16	1.53	3.55	4.55	3.72	19	42	32	40	105	47	54	51	85	107	101	81	91
OS12G0467300	2.8	2.89	3.28	4.14	2.66	4.11	3.87	3.14	5.21	4.77	3.23	4.04	4.95	3.46	4.71	4.17	3.57	4.24	3.25	4.48	3.6	3.39	2.18	4.69	6.13	3.49	4.54	7.88	4.32	5.16	10.33	10.26	7.07	7.33	10.82	10.59	119	105	144	174	120	181	153	145	219	190	138	164	202
OS12G0468300	7.17	7.58	9.28	5.87	1.66	8.73	10.74	6.84	13.51	9.79	6.45	12.16	5.63	4.12	6.18	5.37	2.31	2.51	4.93	6.9	8.74	7.52	3.82	10.4	14.08	9.75	14.3	9.37	5.91	9.68	7.53	4.86	8.6	5.17	1.46	2.37	53	48	71	43	13	67	74	55	99	68	48	86	40
OS12G0516300	31.97	37.25	27.66	43.2	44.2	42.14	38.38	42.61	40.34	39.29	34.08	31.58	35.28	34.79	35.69	31.51	27.15	27.66	37.55	44.74	39.09	43.57	53.73	47.64	43.1	45.25	49.24	34.83	33.83	43.81	42.43	42.69	34.73	27.41	24.42	30.67	904.13	894.36	859.88	1224.66	1380.55	1207.9	1042.07	1287.45	1101.51	1064.95	999.37	821.15	1035.14
OS12G0553200	6.81	6.05	4.09	10.68	7.6	6.6	13.09	14.62	8.33	13.25	13.05	6.48	16.41	11.56	14.35	11.6	8.02	12.58	9.99	6.57	9.21	15.89	11.85	10.81	23.09	16.44	15.86	19.54	14.37	14.62	21.02	15.45	15.26	15.49	8.82	14.86	172.92	131.56	107.66	268.59	204.74	173.99	309.99	404.24	209.74	316.07	333.86	157.53	400.49
OS12G0553600	9.97	12.6	8.76	16.78	15.65	15.52	16.27	14.58	17.96	15.75	16.35	13.09	13.45	11.91	13.23	8.61	9.23	11.28	9.52	13.43	12.92	16.38	16.74	15.61	19.49	14.65	21.1	19.16	12.54	18.26	15.68	13.7	13.31	8.49	7.01	14.1	327.95	355.08	298.46	546.75	546.71	530.1	498.94	522.31	585.76	486.98	541.77	412.31	425.37
OS12G0565100	3.69	4.17	2.95	8.73	5.81	6.5	12.55	10.53	9.83	9.85	8.55	6.35	7.69	8.07	8.37	5.71	3.79	5.43	3.83	3.37	5.04	8.38	8.17	6.52	11.86	8.89	13.27	7.62	7.48	11.91	10.89	7.67	8.61	5.03	4.23	6.04	121	117	100	283	202	221	383	375.43	319	303	281.9	199	242
OS12G0580300	4.15	4.32	3.75	4.47	4	3.57	5.42	7.47	3.88	6.63	5.2	7.07	11.56	7.77	6.14	7.37	6.18	6.29	3.9	7.19	4.07	4.54	5	2.14	7.05	7.96	3.82	7.61	8.23	3.93	9.36	6.82	6.28	6.9	4.5	6.13	46	41	43	49	47	41	56	90	42.65	69	58	75	123
OS12G0612700	1.26	3.15	4.15	1.43	1.75	1.85	1.32	2.34	0.63	0.96	0.39	1.4	0.85	2.07	3.25	1.43	1.92	3.78	2.65	3.64	2.72	1.25	1.86	2.26	1.53	1.67	2.58	2.87	1.59	1.63	1.86	3.23	3.76	1.69	2.67	3.33	24	39	64	26	43	40	10	28	10	18	12	16	24
OS12G0616800	10.05	20.02	14.95	10.59	14.18	9.06	5.28	20.21	6.42	9.01	13.51	7.33	13.17	20.95	14.52	13.36	12.74	23.95	7.33	19.36	16.24	11.61	23.36	12.18	8.9	33.33	12.83	9.11	26.59	21.53	13.47	24.26	17.09	11.45	14.22	23.87	139	237	214	145	208	130	68	304	88	117	188	97	175
OS12G0618600	0.44	1.6	1.45	0.44	0.24	0.78	0	0.4	0.31	0.2	0.12	0	0.26	0.16	0.13	0.28	0.69	0.58	0.17	1.33	1.02	0.33	0.63	0.99	0	0.06	0.07	0.36	0.41	0.26	0.35	0.06	0.07	0.55	0	0.88	7	22	24	7	4	13	0	7	5	3	2	0	4
OS12G0637000	0.22	0.52	0.14	0.37	2.08	0.85	0.16	0.74	0.15	0.08	0.88	0.31	0.54	0.64	1.72	0.58	1.76	1.37	0.1	0.16	0.08	0.32	3.66	0.5	0.29	1.12	0.43	0.12	1.54	0.46	0.08	0.77	1.06	0.24	0.99	0.69	3	6	2	5	30	12	2	11	2	1	12	4	7
OS08G0202400	0.43	1.23	0.41	1.43	2.18	2.07	0.6	0.88	0.77	1.16	1.54	1.1	1.3	2.21	1.54	2.92	8.69	6.13	0.36	0.42	0.54	0.81	1.86	0.86	1.32	0.69	0.85	0.91	2.16	1.27	1.24	4.58	0.63	4.11	12.48	5.4	13	32	13	43	70	65	17	29	23	33	47	32	38
OS08G0205100	1.89	2.62	1.79	3.02	2.27	4.26	3.47	4.09	4.6	4.02	3.04	2.82	5.42	4.27	6.16	3.17	3.98	5.17	3.73	3.17	3.6	3.25	4.58	4.2	4.65	3.77	4.92	4.47	4.21	4.65	7.26	6.16	6.53	4.79	3.65	6.92	58	69	57	92	73.87	136	99.44	136.87	140	116	94.16	83	160
OS08G0205150	0.25	0	0	0	0	0	0	0	0	0.15	0	0	0.28	0.12	0	0.15	0.34	0.48	0	0	0	0	0	0	0	0	0	0	0	0.03	0	0.12	0	0	0.04	0.16	8	0	0	0	0	0	0	0	0	4.42	0	0	8.65
OS08G0224200	42.14	47.62	38.65	55.29	53.86	47.86	45.53	49.71	46.97	57.14	57.23	55.89	59.21	54.34	54.97	62.48	52.08	63.05	51.84	69.5	57.8	65.6	83.78	60.86	54.96	75.93	64.65	64.38	77.23	62.07	57.89	60.53	67.01	72.26	73.48	90.4	939	931	858	1273	1313	1004	942	1260	902	1250	1342	936	1325
OS08G0246100	0.13	0	0	0.23	0	0.03	0.14	0.15	0	0.38	0.03	0	0.1	0.11	0.03	0.19	0.45	0.04	0	0.07	0	0.14	0.07	0	0.33	0.03	0	0.08	0.03	0	0.34	0.31	0	0.47	0.62	0.04	4	0	0	7	0	1	4	5	0	11	1	0	3
OS08G0246300	0	0	0.02	0	0	0	0	0	0	0	0	0	0	0	0	0	0	0	0	0	0	0	0	0	0.1	0	0.03	0	0	0	0.03	0	0	0	0	0.03	0	0	1	0	0	0	0	0	0	0	0	0	0
OS08G0247600	0.47	3.54	0.45	1.64	3.18	1.08	0.44	2.27	0.5	0.53	1.36	0.29	1.98	1.93	2.82	1.98	5.18	3.59	0.3	3.58	1.95	1.35	4.9	1.87	1.53	2.78	1.17	2.58	3.68	1.39	4.18	4.13	4.01	5.69	6.85	6.68	15	97	15	52	108	36	13	79	16	16	44	9	61
OS08G0278100	1.35	1.92	2.32	2.12	1.34	2.67	1.29	2.62	2.42	3.19	2.53	2.9	4.83	4.95	6.77	4.84	2.76	4	1.62	2.23	1.38	3.44	2.54	3.22	3	3.41	3.17	2.31	3.13	2.18	5.62	4.96	7.01	4.25	2.02	3.24	18	22	32	28	19	37	16	38	32	40	34	37	62
OS08G0337601	0	0	0	0	0	0	0	0	0	0	0	0	0	0	0	0	0	0	0	0	0	0	0	0	0	0	0	0	0	0	0	0	0	0	0	0	0	0	0	0	0	0	0	0	0	0	0	0	0
OS08G0371608	0	0	0	0	0	0	0	0	0	0	0	0	0	0	0	0	0	0	0	0	0	0	0	0	0	0	0	0	0	0	0	0	0	0	0	0	0	0	0	0	0	0	0	0	0	0	0	0	0
OS08G0373400	0	0	0	0	0	0	0	0	0	0	0	0	0	0	0	0	0	0	0	0	0	0	0	0	0	0	0	0	0	0	0	0	0	0	0	0	0	0	0	0	0	0	0	0	0	0	0	0	0
OS08G0387700	3.7	2.46	2.04	10.49	5.43	5.31	13.52	10.08	7.94	10.78	8.14	8.05	10.07	7.41	12.25	6.88	7.43	8.17	4.98	5.16	2.56	10.53	7.81	3.55	13.25	8.22	8.06	14.4	13.57	12.18	9.94	7.94	10.81	9.2	2.91	10.55	92	45	61	272	145	117	286	241	184	275	198	200	237
OS08G0398350	0.24	0.8	0.23	0.41	0.46	1.56	0.56	0.3	0.78	10.52	9.65	11.08	0.63	0.11	3.05	23.82	4.36	33.11	0.11	1.16	0.46	0.14	0.69	1.19	0	0.12	0.19	4.76	1.88	2.6	0.23	0.99	1.75	15.87	8.61	11.94	6	17	6	10	12	40	13	8	19	244	240	262	15
OS08G0411850	0	0	0	0	0	0	0	0	0	0	0	0	0	0	0	0	0	0	2.63	10.64	6.06	3.4	4.44	5.78	6.41	4.25	3.71	4.82	6.72	5.02	5.43	5.69	3.87	5.73	2.5	7.03	0	0	0	0	0	0	0	0	0	0	0	0	0
OS08G0411900	0	0	0.05	0	0	0	0	0	0	0	0	0	0	0	0	0	0	0	1.82	2.06	3.26	1.95	2.01	4.21	2.75	2.2	2.66	4.37	2	4.09	2.39	2.35	5.05	3.83	3.27	5.56	0	0	1	0	0	0	0	0	0	0	0	0	0
OS08G0412100	1.44	1.02	1.26	1.8	1.41	1.47	2.03	1.17	2.03	2.53	1.63	2.16	5.12	3.13	3.82	4.46	2.76	4.04	0.99	1.08	1.77	1.7	1.85	1.92	2.04	1.72	2.23	1.77	1.34	2.2	3.76	2.09	2.68	3	2.32	3.34	51	31	46	63	53	54	67	45	71	84	58	73	174
OS08G0434100	3.56	12.28	10.74	3.07	29.89	4.77	0.37	0.64	0.88	0.37	0.6	1.45	0	0.53	1.02	0.59	5.87	1.11	1.88	11.35	3.65	1.92	9.52	4.32	0.09	1.07	0.51	0.29	2.55	0.27	0.1	2.79	0.31	0.76	20.59	0.71	41	121	128	35	365	57	4	8	10	4	7	16	0
OS08G0450100	0	0	0.15	0.05	0.37	0	0	0.1	0	0.11	2.43	0.06	0.39	0.56	0	0	3.91	0.06	0.07	1.24	0	0	1.98	0.24	0.05	0.05	0.06	0.84	2.32	0	0.18	0.4	0.06	0.58	2.72	0.06	0	0	3	1	7.31	0	0	2	0	2	46	1	7
OS08G0460600	18.54	18.64	11.25	22.89	14.04	12.34	29.88	25.84	17.32	41.32	50.28	41.2	29.3	21.93	21.67	44.36	23.97	39.24	21.59	25.02	17.56	22.64	22.78	11.63	29.73	43.38	17.31	52.12	42.77	36.08	15.7	13.51	25.4	32.29	16.65	32.29	309.44	266.48	194.33	378.24	248.74	213.79	464.74	469.29	286.46	647.83	844.92	658.09	469.92
OS08G0478800	8.86	10.63	11.9	9.04	5.64	8.87	4.09	6	7.79	6.74	4.52	6.67	7.88	3.4	7.73	8.64	6.94	11.04	7.69	10.2	10.7	7.51	4.02	8.17	6.19	2.25	4.94	6.11	1.93	5.49	6.35	2.99	5.82	7.89	2.8	6.43	179	184	249	181	121	186	77	132	156	128	92	129	153
OS08G0498600	0.11	0.13	0	0.05	0	0	0.06	0	0.05	0.17	0.11	0.11	0.28	0.22	0.23	0.17	0.05	0.13	2.48	2.06	3.54	0.77	1.16	2.99	0.43	0.31	0.76	0.51	0.26	0.45	0.99	0.87	0.45	1.18	1.38	0.66	2	2	0	1	0	0	1	0	1	3	2	2	5
OS08G0509600	2.14	2.57	2.68	1.72	1.66	2.24	0.81	0.98	1.14	0.94	1.31	0.79	0.79	0.77	0.8	0.64	0.59	0.8	1.45	2.21	2.45	1.83	1.71	1.78	1.39	1.73	1.63	1.31	1.14	1.7	0.79	0.6	0.6	1.51	0.42	0.81	34	35	44	27	28	37	12	17	18	14	21	12	12
OS08G0513300	3.84	4.57	6.37	6.25	6.09	8.69	6.34	13.34	10.61	4.9	9.13	6.97	16.97	26.13	21.23	12.78	12.9	15.87	5.03	5.4	6.69	8.67	5.9	7.8	6.15	11.81	7.1	6.05	10.6	6.85	21.1	29.75	21.19	15.04	7.4	18.02	57	57	96	90	94	132	86	212	153	67	136	97	238
OS08G0531600	0	0	0.06	0	0	0	0.2	0	0	0	0.06	0	0.13	0	0.26	0	0	0.07	0	0	0	0	0.14	0.07	0.06	0	0	0	0.12	0	0.07	0	0.22	0	0.08	0	0	0	1	0	0	0	3	0	0	0	1	0	2
OS08G0539300	13.04	8.82	12.12	12.3	8.9	9.04	8.95	8.4	7.99	9.73	6.72	7.06	15.47	11.44	10.61	9.94	9.01	8.35	13.66	8.09	8.62	14.72	9.91	8.81	9.63	9.76	9.16	7.88	7.87	7.45	15.5	11.4	9.57	10.84	5.41	7.2	214	124	206	200	155	154	137	150	130	150	111	111	244
OS08G0539400	0	0	0	0	0	0	0	0	0	0	0	0	0	0	0	0	0	0	0	0	0	0	0	0	0	0	0	0	0	0	0	0	0	0	0	0	0	0	0	0	0	0	0	0	0	0	0	0	0
OS08G0539700	84.09	175.13	22.64	122.72	101.59	90.05	197.03	174.3	141.05	258.33	270.19	243.61	266.04	109.47	161.7	395.24	162.45	325.81	31.17	108.66	8.92	62.97	68.17	19.26	52.33	77.12	25.77	78.04	88.28	32.5	98.81	45.05	36.99	177.03	63.7	45.32	2286	3872	559	3358	2963	2387	4893	4808	3472	6836	7436	5873	6922
OS08G0539900	0	0	0	0	0	0	0	0	0	0	0	0.04	0	0	0	0	0	0	0	0	0	0	0	0	0	0	0	0	0	0	0	0	0	0	0	0.04	0	0	0	0	0	0	0	0	0	0	0	1	0
OS08G0542700	2.79	2.45	2.73	7.37	9.33	5.67	13.5	18.67	8.25	6.56	11.3	7.74	12.32	23.23	14	5.68	3.46	6	2.97	2.68	1.5	5.81	8.45	4.18	12.78	15.06	7.73	5.86	16	8.27	12.59	19.2	11.29	3.02	4.21	5.9	74.64	56	75.53	194.97	264.47	157.39	336.18	542.92	218.47	164.55	304	197.93	316.34
OS08G0561700	16.46	16.22	20.18	15.62	33.98	24.68	18.08	24.81	20.38	18.99	26.33	22.03	36.71	86.82	32.45	30.82	84.36	29.3	21.96	25.33	17.27	18.43	32.82	12.81	16.27	25.6	11.57	21.62	43.15	11.55	58.2	176.06	22.69	24.1	81.19	20.3	167	141	212	157	366	260	171	274	205	181	269	214	358
OS08G0564000	0	0	0	0	0	0	0	0	0	0	0	0	0	0	0	0	0	0	0	0	0	0	0	0	0	0	0	0	0	0	0	0	0	0	0.08	0	0	0	0	0	0	0	0	0	0	0	0	0	0
OS09G0116100	0	0	0	0	0	0	0	0	0	0	0	0	0	0	0	0	0	0	0	0	0	0	0	0	0	0	0	0	0	0	0	0	0	0	0	0	0	0	0	0	0	0	0	0	0	0	0	0	0
OS09G0124800	1.03	0.77	0.93	0.55	0.74	1.05	0.78	1.05	1.4	0.83	0.78	1.39	1.44	0.84	0.83	0.82	0.41	1.75	2.44	2.69	1.92	1.76	1.57	1.98	3.02	2.34	2.41	1.96	1.83	2.63	2.53	1.6	3.62	1.65	2.03	3.11	17	11	16	9	13	18	12	19	23	13	13	22	23
OS09G0237600	9.22	11.95	7.51	21.18	24.64	16.43	15.39	24.79	13.26	16.88	16.31	12.81	22.42	31.1	25.57	20.91	21.78	22.24	12.8	13.22	13.21	22.23	31.25	19.21	18.46	23.54	21.66	15.5	26.41	16.05	22.96	31.4	27.21	21.8	23.05	35.19	146	162	123	332	414	270	227	427	208	251	260	194	341
OS09G0246300	0.57	1.53	0.55	0.71	0.41	0.88	2.21	0.8	1.16	12.21	3.66	4.46	0.6	0.13	0.6	2.11	3.15	0.16	0.96	1.05	0.15	0.68	0	0.5	3.76	2.72	2.08	5.59	1.57	2.08	0.8	2.76	0.56	1.39	3.74	0.72	4	9	4	5	3	6	14	6	8	80	25	30	4
OS09G0258700	0	0	0	0	0	0	0	0	0	0	0	0	0	0	0	0	0	0	0	0	0	0	0	0	0	0	0	0	0	0	0	0	0	0	0	0	0	0	0	0	0	0	0	0	0	0	0	0	0
OS09G0274900	33.46	52.02	44.04	45.52	66.65	62.95	30.69	147.51	30.08	31	61.99	17.21	48.35	101.93	67.59	25.15	78.88	43.5	41.67	68.32	7.46	83.33	118.24	18.81	96.81	123.12	30.74	43.82	126.14	36.85	101.6	169.21	54.9	77.81	80.75	46.46	193	257	263	260	408	377	165	926	172	168	360	95	268
OS09G0281900	12.65	14.5	15.69	14.3	11.71	14.65	11.24	12.72	13.98	15.54	14.56	14.51	14.82	11.45	16.23	12.76	10.77	14.07	13.1	14.84	18.03	14.68	14.95	21.54	14.06	13.68	17.21	13.85	12.62	17.74	14.05	13.82	14.53	14.11	10.91	14.35	528	507	671	601	521	594	424	577	544	678	654	545	655
OS09G0296450	0	0	0	0	0	0	0	0	0	0	0	0	0	0	0	0	0	0	0	0	0	0	0	0	0	0	0	0	0	0	0	0	0	0	0	0	0	0	0	0	0	0	0	0	0	0	0	0	0
OS09G0392666	105.05	118.87	121.42	226.66	217.07	286.64	416.89	307.07	561.56	322.98	309.71	715.4	209.5	206.45	291.46	226.3	204.39	246.96	114.51	210.58	90.84	110.96	90.02	64.07	325.63	294.39	126.06	487.75	233.55	251.2	223.56	145.33	228.52	139.67	110.03	169.59	1099	1065	1315	2348	2410	3113	4065	3496	5823	3174	3262	7163	2106
OS09G0402001	0.06	0	0	0	0	0	0	0	0	0.06	0	0	0.06	0	0	0	0.05	0	0.08	0.12	0.06	0	0.07	0.13	0	0.05	0	0.1	0	0	0	0	0	0	0	0.07	1	0	0	0	0	0	0	0	0	1	0	0	1
OS09G0420900	2.9	2.72	3.51	1.16	0.96	1.85	1.45	2.33	2.06	1.74	1.79	1.71	3.27	2.31	2.08	1.25	1.68	1.19	4.96	4.64	3.94	5.44	2.44	2.54	4.25	3.52	2.64	3.78	2.95	1.82	2	2.01	2.3	3.88	2.47	1.1	71	57	89	28	25	47	33	62	50	40	44	40	77
OS09G0491532	0	0	0.07	0.15	0	0.07	0	0	0	0	0.08	0	0.08	0	0	0	0.39	0	0	0.08	0	0	0.17	0	0	0	0	0	0.07	0	0.09	0	0	0.08	0	0	0	0	1	2	0	1	0	0	0	0	1	0	1
OS09G0491740	88.19	13.29	38.93	215.65	18.95	89.7	593.03	158.63	416.63	366.39	233.24	446.56	134.13	107.1	158.99	147.69	36.6	127.53	66.44	5.79	17.13	62.52	7.19	30.52	192.1	53.85	154.64	133.66	60.41	234.17	52.27	32.15	71.78	52.73	30.65	63.55	2022	261	924	4896	461	2135	12673	3958	9468	7891	5384	9799	2955
OS09G0497400	114.94	103.81	115.72	148.09	102.13	128.28	172.16	178.56	195.14	166.33	152.34	148.99	149.61	144.97	175.64	125.99	117.28	153.87	116.06	107.4	119.49	149.22	129.9	129.41	177.31	158.2	194.99	161.07	150.9	174.61	156.87	132.96	198.63	136.99	104.21	136.41	1280	990	1334	1633	1207	1483	1787	2164	2154	1740	1708	1588	1601
OS09G0507100	1.23	0.25	0.63	0.36	0	0.56	0.15	0.33	0.07	0	0	0.3	0.23	0.13	0.15	0.49	0.31	0.17	2.92	1.3	1.11	1.34	1.22	0.57	1.37	0.21	0.51	0.54	0.68	0.67	0.74	0.48	1.12	1.26	0.87	0.25	17	3	9	5	0	8	2	5	1	0	0	4	3
OS09G0517100	6.86	21.95	16.52	8.32	24.61	14.62	6.43	8.66	8.94	4.4	7.55	6.04	7.17	17.39	8.42	3.55	10.66	4.99	9.31	19.9	15.77	5.69	15.12	15.14	3.39	4.28	4.69	2.43	5.15	3.04	6.83	12.76	5	4.24	14.53	7.31	265	734	672	308	984	580	221	350	330	151	281	218	253
OS09G0517200	0.07	0.04	0.03	0.11	0.03	0.61	0.45	0.13	1.24	0.52	0.17	0.66	1.17	0.24	0.37	2.58	0.66	0.41	0.09	0.19	0.32	0.06	0	0.24	0.18	0.2	0.16	0.12	0.07	0.15	0.52	2.19	0.46	0.99	9.15	2.58	2	1	1	3	1	18	12	4	35	14	5	18	32
OS09G0521700	3.16	3.4	3.28	2.7	2.83	1.69	2.86	2.99	3.89	2.49	2.24	2.71	3.3	2.45	4.67	3.11	1.92	3.77	3.48	3.71	4.1	3.38	5.36	4.41	3.9	3.3	5.58	4.63	2.86	4.32	3.32	2.13	4.31	2.83	1.46	4.37	37	34	38	32	36	20	31	39	42	28	27	31	38
OS09G0539200	0.82	0.88	1.75	1.89	1.41	2.69	1.9	1.85	1.48	1.56	1.9	1.14	1.17	0.89	2.39	1	0.73	2.14	0.6	1.2	0.49	1.2	1.12	1.27	1.71	0.45	1.52	1.59	0.91	1.84	1.74	0.58	1.51	0.82	0.46	2	24	22	53	55	44	82	52	59	43	43	56	32	33
OS09G0545051	0	0	0	0	0	0	0	0	0	0	0	0	0	0	0	0	0	0	0	0	0	0	0	0	0	0	0	0	0	0	0	0	0	0	0	0	0	0	0	0	0	0	0	0	0	0	0	0	0
OS09G0570900	2.74	4.17	3.66	5.3	6.48	6.71	6.95	8.73	9.64	4.2	9.44	4.68	8.67	13.72	8.76	6.57	10.09	4.49	4.43	8.48	4.19	6.03	11.74	7.57	10.47	12.05	7.26	5.86	9.31	5.46	17.54	18.45	10.45	9.11	13.94	6.21	56	66	75	101	131	143	128	188	186	75	183	85	160
OS09G0571100	0	0	0	0.07	0	0	0	0.13	0	0.23	0.07	0	0.08	0.32	0.08	0	0.63	0	0	0	0	0	0	0	0	0.21	0.09	0	0.07	0.08	0	0.21	0.18	0.08	0.49	0.17	0	0	0	1	0	0	0	2	0	3	1	0	1
OS09G0572400	13.83	17.32	16.43	16.9	18.15	18.96	20.02	17.74	18.48	24.76	26.05	23.3	23.77	17.6	20.03	29.03	21.91	29.31	12.93	14.64	13.48	13.41	12.66	17.21	14.47	12.93	15.79	21.23	14.05	19.39	10.91	12.87	17.92	22.83	26.89	22.21	328.14	352	403.69	397	457	467	442.77	458	434.55	551.87	622.4	529.25	541.95
OS10G0113000	0.65	0	0.08	0.67	0.08	0	0.54	1.94	0.08	0.51	1.76	0	11.57	34.59	8.23	1.72	13.26	5.58	2.23	1.34	3.28	5.72	5.61	1.66	18.13	13.1	4.65	22.21	31.61	12.93	24.12	37.42	18.8	16.56	23.93	21.69	7.77	0	1	7.92	1	0	6	25	1	5.74	21	0	132
OS10G0113100	40.68	24.49	34.38	39.54	56.61	39.77	16.69	20.93	19.83	19.76	21.21	28.29	18.78	84.98	31.06	41.58	191.99	79.1	1.58	2.5	6.52	9.54	8.44	5.85	23.32	21.13	15.56	16.22	16.62	21.36	37.67	63.99	28.56	15.17	48.71	32.21	480	247	420	462	709	487.24	183.61	268.78	232	219	252	319.49	213
OS10G0118900	15.95	31.78	17.43	28.14	38.15	34.02	20.83	16.15	22.72	23.5	19.52	24.69	24.33	19.94	24.05	29.46	32.3	30.47	18.51	34.67	25.68	22.38	46.09	25.56	18.11	24.77	18.82	25.2	30.99	21.44	20.63	22.35	27.4	33.21	36.32	39.64	177	299	198	306	447	389	213	194	249	244	217	259	260
OS10G0130701	0	0	0	0.03	0	0.13	0	0	0	0	0	0	0	0	0	0	0	0	0	0	0	0	0	0	0.03	0	0.04	0	0	0	0	0.09	0.08	0	0	0	0	0	0	1	0	4	0	0	0	0	0	0	0
OS10G0131000	0	0	0	0	0	0	0	0	0	0	0	0	0	0	0	0	0	0	0	0	0	0	0	0.04	0	0	0.04	0	0	0	0	0	0	0	0	0	0	0	0	0	0	0	0	0	0	0	0	0	0
OS10G0132700	13.29	12.45	12.93	18.33	12.89	16.3	25.8	21.88	24.16	26.22	22.4	25.69	17.02	12.64	28.87	18.84	9.06	23.29	18.43	21.1	18.57	22.47	18.26	25.65	28.65	23.64	36.03	32.95	17.94	32.58	17.71	12.71	35.68	15.9	11.73	22.84	340.19	273.08	342.76	464.74	350.24	433.42	615.88	609.81	613.07	630.59	577.49	629.52	418.85
OS10G0142100	21.17	22.76	29.63	19.35	17.11	31.52	42.64	37.05	61.73	61.5	48.78	83.51	52.34	25.54	56.84	46.99	14.44	36.47	12.33	25.47	24.33	14.24	15.89	24.13	56.89	34.1	46.58	53.64	45.35	51.63	51.76	35.15	61.75	30.53	12.7	29.23	200	231	341	227	200	350	471	410	602	629	582	702	596
OS10G0328700	0	0.05	0	0	0.09	0	0	0	0	0	0	0	0	0	0	0	0	0.05	0	0	0	0	0	0	0	0.04	0	0	0	0.1	0	0	0.06	0	0.31	0.05	0	1	0	0	2	0	0	0	0	0	0	0	0
OS10G0350200	0	0	0	0	0	0	0	0	0	0	0	0	0	0	0	0	0	0	0	0	0	0	0	0	0	0	0	0	0	0	0	0	0	0	0	0	0	0	0	0	0	0	0	0	0	0	0	0	0
OS10G0350450	0	0	0	0	0	0	0	0	0	0	0	0	0	0	0	0	0	0	0	0	0	0	0	0	0	0	0	0	0	0	0	0	0	0	0	0	0	0	0	0	0	0	0	0	0	0	0	0	0
OS10G0370100	7.53	10	8.34	12.35	8.19	10.27	11.78	11.22	11.31	11.53	11.42	12.47	11.81	9.52	11.51	10.99	7.37	12.36	11.98	11.89	10.03	12.15	12.29	14.4	12.8	11.02	13.04	11.78	7.48	13.27	10.71	10.5	12.21	9.36	6.41	10.66	281	300	307	446	334	385	396	463	390	416	433	408	455
OS10G0370400	2.67	2.95	2.31	4.28	4.69	4.3	3.71	5.9	4.44	3.85	4.67	2.9	6.48	5.49	4.91	4.07	4.74	6.03	2.9	3.61	2.62	4.68	7.77	4.09	5.09	6.16	4.73	4.72	5.66	4.88	8.25	7.66	4.63	5.7	4.43	5.35	98	93	88	156	183	164	127	236	162	133	173	102	229
OS10G0456950	0	0.1	0.17	0.09	0.16	0.17	0.09	0.24	0.26	0.64	0	0.18	1.16	0.45	0.82	0.39	0	1	0	0.36	0	0	0	0	0	0.16	0.2	0.57	0.08	0.53	0.29	0.16	0.93	0.28	0	0.4	0	1	2	1	2	2	1	3	3	7	0	2	13
OS10G0469100	0.27	0.22	0.54	0.54	0.17	0	0.26	0.95	0	0.2	0	0	0	0.35	0	0.21	0	0.64	0	0.2	0.84	0.14	0.37	0.91	0.15	0.18	1.13	0.86	0.66	0	0.79	0.53	0.22	0.61	0.32	1.41	9	1	9	8	6	0	8	15	0	1	0	0	0
OS10G0480200	8.91	10.93	12.61	7.85	10.28	8.79	5.32	8.65	6.97	9.01	9.07	10.82	6.09	8.35	8	10.3	16.9	17.83	11.78	20.29	9.55	12.28	16.79	8.58	8.71	8.53	6.3	9.8	8.33	7.14	8.62	10.25	7.25	16.91	19.93	14.76	249.98	258	341	201	303	231	135	263	166.96	238	254.98	254	174
OS10G0498100	0	0	0.05	0	0	0	0.21	0.18	0.05	0.11	0.05	0.31	0.21	0.39	0.32	0.06	0	0	0	0	0	0.09	0.06	0	0.05	0.09	0.06	0	0.05	0	0.11	0.19	0.18	0	0	0.06	0	0	1	0	0	0	4	4	1	2	1	6	4
OS10G0502600	7.93	6.06	8.24	7.38	10.14	9.56	10.82	9.18	9.99	6.58	6.76	6.4	9.04	10.55	8.95	4.23	3.91	6.83	6.66	5.98	12.86	6.8	6.8	10.98	9.31	9.64	8.69	18.16	10.3	7.52	14.87	11.24	10.44	6.44	6.07	7.81	93	73	113	86	126	129	115	119	106	73	76	76	100
OS10G0514300	0	0	0	0	0	0	0	0	0	0	0	0	0	0	0	0	0	0	0	0	0	0	0	0	0	0	0	0	0	0	0	0	0	0	0	0	0	0	0	0	0	0	0	0	0	0	0	0	0
OS10G0558900	1.52	0.89	0.81	1.02	0.87	0.81	1.63	3.17	0.93	0.9	1.51	1.5	2.45	2.35	2.06	1.62	1.37	1.37	1.25	1.88	0.35	0.97	1.81	0.86	3.63	2.96	0.59	2.25	3.12	1.57	4.5	4.62	1.01	2.12	2.5	2.37	18	9	10	12	11	10	18	41	11	10	18	17	28
OS10G0575200	28.53	28.76	29.32	35.14	26.14	31.94	30.08	31.68	27.79	37.48	28.81	30.68	47.73	30.34	38.6	46.5	25.9	38.97	32.77	36.57	33.39	35.74	27.46	34.13	33.72	27.42	32.72	33.86	21.91	29.44	48.35	27.93	45.28	34.52	26.67	39.09	918	758	922	1170	866	941	885	1063	819	1203	976	843	1863
OS11G0116000	181.87	332.88	277.48	75.87	381.8	139.5	3.78	54.08	10.34	20.42	113.19	23.09	12.1	62.98	23.61	31.57	293.77	71.57	107.92	831.61	302.51	85.06	482.92	147.25	20.78	94.48	22.32	95.77	416.87	71.44	26.97	128.01	37.02	152.97	384.26	135.18	1650.11	2586.51	2606.3	681.63	3676.29	1314	32	534	93	174	1034	200.52	105.51
OS11G0124900	0.11	0.04	0.11	0	0.1	0.21	0.12	0	0	0.19	0.36	0.11	0.34	0.06	0.27	0.37	0.28	0.21	0.15	0.08	0.07	0.06	0	0.08	0.15	0.14	0.09	0.03	0.14	0.11	0.33	0.31	0.35	0.04	0.15	0.17	3	1	3	0	3	6	3	0	0	5	10	3	9
OS11G0170400	5.31	5.91	8.55	9.04	6.42	10.75	10.91	8.49	11.35	10.23	6.2	11.2	13.36	6.64	10.19	10.7	4.99	10.29	5.46	9.01	9.38	8.15	7.72	9.91	13.69	8.5	10.5	10.54	5.38	10.23	11.25	7.02	14.43	7.68	4.35	8.53	153.2	147.25	251.54	259.78	197.76	322.27	294.77	271.37	327.44	279.56	184.16	303.8	386.48
OS11G0173432	0.03	0	0	0.03	0	0	0	0.02	0	0	0.03	0.03	0	0	0	0.09	0.02	0.03	0	0.03	0	0	0	0	0	0	0	0	0	0	0	0	0.03	0	0	0	1	0	0	1	0	0	0	1	0	0	1	1	0
OS11G0199000	0	0	0	0	0	0	0	0.05	0	0	0	0	0.06	0.05	0	0	0	0	0	0	0	0	0	0	0	0	0	0	0	0	0	0	0	0	0	0	0	0	0	0	0	0	0	1	0	0	0	0	1
OS11G0209300	0	0	0	0	0	0	0	0	0	0	0	0	0	0	0	0	0	0	0	0	0	0	0	0	0	0	0	0	0	0	0	0	0	0	0	0	0	0	0	0	0	0	0	0	0	0	0	0	0
OS11G0222900	19.79	11.98	15.28	16.33	9.58	16.5	15.69	14.69	18.54	15.36	9.46	14.44	22.26	11.02	25.85	17.91	6	18.45	35.17	18.73	48.51	36.55	20.97	59.29	27.1	19.46	36.63	29.52	15.88	39.6	38.99	19.43	36.59	24.21	8.94	24.56	688.16	358.56	551.9	560.81	352.76	597.46	511.66	558.84	640.09	502.53	333.77	483.46	737.93
OS11G0223201	3.15	2.21	2.45	3.9	2.15	2.32	3.21	3.18	2.7	4.45	2.93	2.08	6.12	2.87	4.11	4.14	3.04	6.14	4.65	1.59	5.27	4.64	2.35	7.68	4.55	1.42	6.82	4.09	1.5	6.88	2.67	2.47	4.68	3.5	2.8	3.83	132.84	80	107	163	96.08	101.67	126.08	145.97	113	176.43	124.42	84	248
OS11G0223400	14.39	11.84	10.87	19.2	10.54	23.34	21.51	12.12	27.68	15.63	13.4	28.9	14.35	12.64	13.54	19.52	13.64	15.85	18.12	14.97	15.44	19.13	15.15	18.37	18.2	15.69	19.96	15.49	10.62	17.39	13.89	13.52	15.65	12.94	9.33	13.17	193	136	151	255	150	325	269	177	368	197	181	371	185
OS11G0225100	12.99	12.46	13.66	14.98	11.25	13.07	12.75	10.82	11.38	15	11.97	8.99	12.71	9.45	12.95	9.5	8.35	13.9	11.06	7.76	9.5	12.6	9.93	12.84	14.54	12.52	15.15	13.25	12.18	15.92	14.69	10.39	11.74	10.3	6.68	8.36	471	387	513	538	433	492	431	427	409	511	437	312	443
OS11G0225300	0	0	0	0	0	0	0	0	0	0	0	0	0	0	0	0.13	0	0	3.59	4.59	3.27	4.3	5.37	4.64	5.44	5.17	4.68	5.12	4.63	4.86	5.29	5.43	5.91	4.61	4.91	5.91	0	0	0	0	0	0	0	0	0	0	0	0	0
OS11G0226400	0	0	0	0	0	0	0	0	0	0	0	0	0	0	0	0	0	0	5.41	7.22	5.4	6.98	7.66	6.08	5.32	5.9	6.09	5.48	4.6	4.51	5.74	4.97	6.05	5.44	4.59	6.48	0	0	0	0	0	0	0	0	0	0	0	0	0
OS11G0226700	0	0	0	0	0	0	0	0	0	0.02	0	0	0	0	0	0	0	0	0.85	1.48	1.1	1.25	1.65	0.95	2.05	2.07	1.07	1.65	1.77	2	2.3	1.52	1.53	1.98	1.28	1.17	0	0	0	0	0	0	0	0	0	1	0	0	0
OS11G0237600	1.93	2.59	2.68	3.59	3.09	4.42	2.68	5.1	3.78	4.02	3.47	4.07	4.45	5.29	4.77	3.39	3.44	5.44	2.78	4.11	4.06	3.3	4.44	4.16	4.09	4.79	4.43	4.03	4.33	4.85	4.18	5.01	5.76	3.78	3.53	5.8	62	71	89	114	105	147	80	178	120	121	112	125	137
OS11G0237900	0.37	0.34	0.57	0.48	0.59	0.39	0.47	0.54	0.85	0.04	0.18	0.34	0.69	0.86	0.9	0.33	0.19	0.21	0.45	1.09	0.83	0.74	0.7	0.7	0.48	0.52	0.26	0.34	0.35	0.53	0.71	0.55	0.79	0.2	0.2	0.13	10	8	16	13	17	11	12	16	23	1	5	9	18
OS11G0238700	0	0	0	0	0	0	0	0	0	0	0	0	0	0	0	0	0	0	0	0	0	0	0	0	0	0	0	0	0	0.12	0	0	0	0	0	0	0	0	0	0	0	0	0	0	0	0	0	0	0
OS11G0249000	0	0	0.03	0	0	0	0.07	0	0	0.07	0	0	0.04	0.03	0.04	0	0.06	0	0	0	0	0.06	0	0	0	0	0	0	0	0	0.04	0	0	0	0.09	0	0	0	1	0	0	0	2	0	0	2	0	0	1
OS11G0258500	0.4	0.31	0.34	0.41	0.09	0.17	0.38	0.18	0.67	0.22	0.22	0.31	0.32	0.32	0.62	0.39	0.08	0.37	0.3	0.32	0.28	0.2	0.05	0.45	0.73	0.18	0.11	0.29	0.19	0.26	0.05	0.19	0.75	0.14	0.06	0.25	11.4	7.67	10.14	11.6	2.72	4.93	10	5.59	18.97	5.79	6.29	8.53	8.85
OS11G0265900	2.23	1.62	1.53	3.61	2.41	4.02	2.51	4.14	3.64	1.97	2.96	1.79	4.72	5.49	4.82	3.13	2.61	3.39	2.18	2.13	2.27	4.2	3.11	3.35	4.22	4.27	2.58	2.16	3.35	2.88	5.57	7.57	3.75	2.84	3.79	3.45	69	43	49	114	79	130	73	140	114	58	93	53	142
OS11G0266500	3.72	2.78	2.86	3.53	2.2	8.19	5.14	4.42	10.29	6.14	3.51	9.22	15.94	7.97	14.59	10.28	4.89	11.49	4.08	3.43	9.65	4.58	1.98	7.28	5.69	4.87	8.6	7.25	3.22	6.51	14.2	9.28	10.06	7.91	4.77	9.74	118	73	93	110	74	269	152	151	322	179	107	276	475
OS11G0297300	0	0	0	0	0	0	0	0	0	0	0	0	0	0	0	0	0	0	0	0	0	0	0	0	0	0	0	0	0	0	0	0	0	0	0	0	0	0	0	0	0	0	0	0	0	0	0	0	0
OS11G0303500	16.3	19.72	16.55	20.03	15.91	16.59	21.87	18.73	16.27	22.41	20.7	18.26	21.03	14.06	22.23	21.24	11.02	23.92	21.1	20.53	22.96	23.92	20.87	26.84	24.31	21.52	26.9	26.21	19.2	28.82	22	18.62	27.33	19.96	16.16	23.51	387	401	407	471	401	409	484	484	383	500	495	415	480
OS11G0441900	0.27	0.16	0	0.41	0.63	0.65	0	1.05	0	0.43	1.07	0	0.14	1.46	0.21	0.46	0.29	0.55	0.09	0.29	0.14	0.3	0.83	0.38	0.2	0.06	0.47	0.39	0.89	0.28	0.3	0.51	0.56	0.29	0.54	0.63	4	2	0	6	10	10	0	17	0	6	16	0	2
OS11G0462500	0.27	0.2	0.2	0.07	0.13	0.13	0	0.28	0.03	0.26	0.07	0.04	0.18	0.15	0.18	0.27	0.18	0.12	0.19	0.15	0.21	0.3	0.16	0.23	0.17	0.2	0.28	0.2	0.03	0.18	0.31	0.1	0.08	0.3	0.19	0.24	8	5	6	2	4	4	0	9	1	7	2	1	5
OS11G0462900	0.29	0.15	0.38	0.59	0.48	0.34	0.3	0.79	1.01	0.46	0.48	0.79	1.39	0.78	1.71	0.84	0.63	1.52	0.53	0.44	0.76	0.97	0.79	0.84	0.85	1.32	1.03	1.15	0.99	1.11	1.42	1.91	2.09	1.69	1.01	1.73	13.49	6.07	18.3	27	23.87	16.28	13	40	46.39	20.3	22.58	35	62
OS11G0480000	0.37	0.39	0.5	0.11	0.62	0.57	0.67	0.24	0.67	0.51	0.58	0.34	0.23	0.41	0.94	0.5	0.38	0.13	0.35	1.13	0.64	0.19	1.16	0.75	1.03	0.56	0.56	0.67	0.84	0.72	0.58	0.83	0.35	0.56	0.39	0.39	10	9	14	3	18	16	17	7	18	13	16	9	6
OS11G0481150	0.24	0.09	0.1	0.22	0.03	0	0.06	0.02	0.03	0.06	0.11	0.03	0.08	0.02	0.14	0.06	0.05	0.06	0.29	0.14	0.16	0.07	0.18	0.03	0.13	0.1	0.19	0.2	0.15	0.06	0.06	0.03	0.06	0.2	0	0.06	9	3	4	8	1	0	2	1	1	2	4	1	3
OS11G0496600	2.34	3.17	1.99	2.55	1.5	2.34	0.7	1.63	1.79	1.69	2.04	1.27	1.36	1.95	2.09	1.91	2	1.41	5.68	3.67	3.74	5.11	2.74	2.54	2.81	3.63	2.42	2.34	3.2	2.52	3.29	2.21	2.36	1.63	2.64	1.64	25	29	22	27	17	26	7	19	19	17	22	13	14
OS11G0524601	0.38	0.18	0.29	0.38	0.07	0.29	0.57	0.69	0.76	1.45	0.98	0.87	0.55	0.26	0.16	0.34	0.13	0.44	0	0	0	0	0	0	0	0	0	0	0	0	0	0	0	0	0	0	5	2	4	5	1	4	7	10	10	18	13	11	7
OS11G0543500	1.37	0.51	2.76	0.38	0.18	1.14	0.07	0	0.06	0	0	0	0	0.7	0.07	0	0.32	0	3.86	5.15	12.31	1.7	1.26	6.33	0.37	0.29	0.22	0.05	0	0.06	1.06	2.76	0.07	0.41	3.43	0	22	7	46	6	3	19	1	0	1	0	0	0	0
OS11G0550100	0.23	0.33	0.11	0.23	0.48	0.27	0.6	0.26	0.34	0.48	0.45	0.24	1.17	0.59	0.78	0.26	0.72	0.65	0.99	0.54	1.73	0.55	0.51	0.89	0.84	0.59	0.59	1.08	1.18	0.76	1.66	1.49	1.22	1.17	2.43	1.19	4	5	2	4	9	5	10	5	6	8	8	4	20
OS11G0550500	2.78	3.58	1.93	6.6	2.83	6.3	8.92	5.29	6.03	8.06	5.96	5.65	13.44	6.31	10.66	14.88	6.9	11.59	3.21	2.39	2.53	3.56	2.33	2.01	6.38	2.34	2.53	4.7	2.05	2.46	8.6	4.08	3.04	7.65	3.37	4.5	89	98	64	209	96	209	266	184	191	242	192	173	413
OS11G0551900	0.24	0.22	0.64	0.38	0.36	0.41	0.2	0.35	0.1	0	0	0.2	0	0.08	0	0.05	0.04	0.17	0.06	0.45	0.19	0.04	0	0.27	0.05	0.04	0	0	0.09	0.2	0	0.09	0.06	0	0	0.11	5	4	14	8	8	9	4	8	2	0	0	4	0
OS11G0588600	28.68	30.15	36.57	28.75	24.43	33.39	24.36	25.92	24.7	25.05	21.33	22.38	22.56	22.17	26.83	13.35	13.04	17.45	24.76	27.81	35.65	27.92	24.02	40	29.96	20.24	28.45	29.65	17.37	27.15	32.13	25.15	29.15	17.13	13.85	18.18	1114.98	1004	1471.96	1107	1007.98	1348	883	1097	951.99	914.97	835	833	843
OS11G0590400	0	0	0	0	0	0	0	0	0	0	0	0	0	0	0	0	0	0	0.32	0.26	0.18	0.21	0.27	0.14	0.36	0.23	0.14	0.55	0.17	0	0.27	0.28	0.36	0.39	0.48	0.07	0	0	0	0	0	0	0	0	0	0	0	0	0
OS11G0592550	0	0	0	0	0	0	0	0	0	0	0	0	0	0	0	0	0	0	0	0	0	0	0	0	0	0	0.08	0	0	0	0	0	0	0	0	0	0	0	0	0	0	0	0	0	0	0	0	0	0
OS11G0604900	0	0	0	0	0	0	0	0	0	0	0	0	0	0.03	0	0	0	0.04	23.67	33.89	22.88	23.97	23.77	26.58	16.48	26.78	15.2	25.7	25.82	21.94	37.64	23.19	31.82	33.98	10.69	24.56	0	0	0	0	0	0	0	0	0	0	0	0	0
OS11G0605900	0	0	0	0.03	0	0.03	0	0.06	0	0.03	0	0	0.17	0.2	0.03	0	0.08	0.04	0	0	0.07	0.03	0.18	0.04	0.33	0.16	0.04	0.08	0.06	0.03	0.33	0.12	0.2	0.14	0.09	0.08	0	0	0	1	0	1	0	2	0	1	0	0	5
OS11G0606500	0	0	0	0	0	0	0	0	0	0	0	0	0	0	0	0	0	0	12.49	7.83	7.91	8.82	5.96	7.73	6.03	3.58	3.49	3.81	2.97	1.88	8.73	6.14	3.86	7.47	4.16	2.67	0	0	0	0	0	0	0	0	0	0	0	0	0
OS11G0611100	4.23	2.7	3.22	2.98	1.69	2.97	2.07	1.65	2.33	1.37	2.68	2.55	2.14	3.01	2.05	3.34	2.2	3.43	1.91	1.91	1.58	1.25	0.72	1.45	2.18	0.97	0.75	0.64	1.95	0.8	2.04	1.94	0.92	2.66	0.86	1.65	33	18	26	23	14	24	15	14	18	10	21	19	16
OS11G0629400	2.25	8.72	8.71	1.14	7.17	4.34	0.45	0.39	1.28	1.5	1.26	0.59	0.29	0.37	0.3	0.16	5.3	0	4.95	11.52	7.8	3.11	10.5	5.73	0	1.34	2.48	0.35	1.74	0.73	0.64	4.26	1.01	4.92	6.45	1.15	16	53	64	8	54	32	3	3	9	10	9	4	2
OS11G0629550	1.17	1.38	0.92	0.8	0.48	0.98	1.38	0.87	1.12	0.91	0.76	0.44	1.43	1.01	2.81	1.14	0.95	1.66	1.75	0.68	2.24	3.01	2.02	3.15	3.35	1.59	2.7	3.51	1.14	3.13	2.85	1.81	2.03	1.64	1.14	1.25	27.62	27.8	22.39	18.59	11.91	24.02	30.33	22.31	26.09	20.11	17.93	9.94	32.43
OS11G0652100	0	0.05	0.15	0.04	0.04	0.04	0.12	0.22	0.11	0.26	0.26	0.07	0.5	0.27	0.4	0.17	0.04	0.05	0.03	0.16	0.18	0.04	0	0	0.13	0.13	0.03	0.17	0.02	0.05	0.08	0.02	0.13	0.07	0	0	0	2	7	2	2	2	5	11	5	11	12	3	22
OS11G0653300	0	0.04	0.03	0	0.06	0	0.07	0.09	0	0.1	0.28	0.03	0.23	0.03	0.07	0.18	0.03	0.04	0	0.14	0	0.03	0.04	0	0.25	0.06	0.04	0.16	0.27	0.1	0.04	0.03	0	0.03	0.13	0	0	1	1	0	2	0	2	3	0	3	9	1	7
OS11G0654800	0.99	0.85	0.85	0.52	1.41	0.85	0.67	0.61	0.89	1.29	0.65	0.73	0.99	0.38	0.93	0.75	0.88	0.89	0.74	1.44	1.01	0.42	0.87	0.83	0.99	1.39	1.76	0.85	1.15	1.06	0.83	0.69	0.31	1.4	0.34	0.73	27	20	24	14	41	24	17	18	24	33	18	19	26
OS11G0668100	5.21	5.07	4.89	9.68	7.41	7.96	9.98	8.65	8.73	7	5.14	6.23	7.33	7.28	7.82	4.76	4.15	5.76	3.83	3.97	3.68	4.05	6.08	4.55	8.16	5.41	5.44	5.57	5.15	5.88	7.79	6.82	5.04	5.06	4.3	5.38	145	121	141	267	219	230	259	262	241	183	144	166	196
OS11G0684100	8.37	14.24	8.96	10.26	11.62	11.55	5.5	6.4	8.83	9.47	8.68	8.16	9.71	7.45	8.51	11.53	10.79	12.66	3.25	4.67	6.41	4.47	4.44	5.98	3.47	3.15	4.59	4.95	2.88	5.88	5.57	4.62	5.81	5.83	4.16	6.4	360	519.8	398.66	436.58	522.68	510.41	217.38	303.84	378.47	376.79	369.24	336.88	402.47
OS11G0684700	6.03	6.34	3.99	11.92	9.66	9.61	13.24	11.98	11.43	14.41	12.38	11.54	15.8	13.37	13.95	14.23	10.34	13.31	7.29	6.6	6.7	11.22	12.58	8.7	13.33	9.52	12.6	13.56	13.22	13.84	20.11	16.37	12.15	15.58	12.62	14.74	191	172	131	374	325	316	391	413	359	429	395	350	481
OS11G0686400	1.63	3.37	1.92	7.41	5.63	4.63	8.95	8.74	10.03	8.54	10.67	10.55	10.45	9.33	11.3	10.28	9.16	11.48	1.87	2.8	2.17	2.27	3.83	2.31	3.4	3.26	2.38	3.7	3.36	2.54	5.51	5.26	3.59	4.96	6.29	6.95	47	83.2	57.34	211.42	172.32	138.59	240.62	274.16	286.53	231.36	309.76	291.12	289.53
OS11G0686500	1.24	2.74	1.22	3.18	4.21	1.95	3.24	4.43	4.19	2.78	4.82	2.98	4.46	4.85	4.24	3.08	5.23	4.07	0.98	2.29	0.88	1.35	3.1	1.1	1.97	1.81	2.15	1.73	1.89	1.37	3.34	3.54	1.58	2.41	2.57	1.92	46	87	47	117	166	75	112	179	154	97	180	106	159
OS11G0686900	0	0	0	0	0	0	0	0	0	0	0	0.04	0.04	0	0	0.09	0	0	0	0	0	0	0	0	0	0	0	0.03	0	0	0	0	0	0	0.11	0	0	0	0	0	0	0	0	0	0	0	0	1	1
OS11G0687900	0	0	0	0	0	0	0	0	0	0	0	0	0	0	0	0	0	0	0	0	0	0	0	0	0	0	0	0	0	0	0	0	0	0	0	0	0	0	0	0	0	0	0	0	0	0	0	0	0
OS11G0689100	0.08	0.11	0.19	0.18	0.1	0.23	0.09	0.09	0.24	0.1	0	0.29	0.15	0.07	0.26	0.09	0.02	0.13	0.29	0.15	0.29	0.24	0.37	0.18	0.03	0.15	0.13	0.23	0	0.15	0.11	0.18	0.39	0.2	0.04	0.16	3	3	7	4	4	8	3	3	8	3	0	8	5
OS12G0115300	76.01	226.19	148.22	43.76	281.87	68.84	5.79	70.3	9.92	6	28.7	5.07	11.42	41.72	16.23	11.72	49.8	26.33	60.24	381.39	151.65	58.6	327.52	103.68	26.95	86.29	32.19	27.05	96.86	28.6	33.03	94.59	35.38	31.69	86.59	44.48	633.89	1615.49	1279.7	361.37	2494.71	596	45	638	82	47	241	40.48	91.49
OS12G0131100	12.87	11.47	8.67	43.61	37.42	41.92	51.51	52.05	49.8	27.49	30.19	30.25	47.32	64.22	56.31	30.32	15.64	22.03	13.26	15.47	11.54	27.78	52.3	30.34	34.4	40.06	41.46	17.02	38.45	21.16	45.49	49.6	47.84	16.46	24.62	32.4	152	116	106	510	469	514	567	669	583	305	359	342	537
OS12G0131150	0.41	0	0	2.92	0.78	0	0.44	0.38	0	0	0	0	0	1.43	0	0	0	0	0	0.88	0.85	0	3.73	0.47	0.83	0	0.48	0.69	0	0	0.47	1.17	0.49	0	0	0.48	1	0	0	7	2	0	1	1	0	0	0	0	0
OS12G0166600	0	0	0	0	0	0	0	0	0	0	0	0	0	0	0	0	0	0	0	0	0	0	0	0	0	0	0	0	0	0	0	0	0	0	0	0	0	0	0	0	0	0	0	0	0	0	0	0	0
OS12G0198900	0	0	0	0	0	0	0	0	0	0	0	0	0	0	0	0	0	0	0	0	0	0	0	0	0	0	0	0	0	0	0	0	0	0.04	0.09	0	0	0	0	0	0	0	0	0	0	0	0	0	0
OS12G0237900	1.93	0.59	0.34	3.29	2.62	0.58	2.14	2.58	0.67	2.25	2.98	0.46	4.6	3.63	1.48	2.54	3.68	1.76	0.6	1.28	0.39	2.48	4.75	0.18	3.35	2.19	1.08	3.45	3.51	1.18	4.95	2.54	1.63	7.07	4.51	1.77	61	16	11	103	88	19	63	89	21	67	95	14	140
OS12G0270300	2.46	3.08	3.98	2.43	4.68	4.96	0.78	1.47	1.61	2.12	1.82	1.91	2.03	4.08	3.69	2.19	3.01	2.35	2.88	6.76	5.56	3.56	7.03	5.62	1.9	1.53	2.12	3.14	2.64	1.53	2.62	4.47	3.17	3.17	4.06	3.12	82	89	139	74	165	174	22	50	54	63	62	55	66
OS12G0272800	0.03	0	0.09	0.03	0.03	0.13	0.11	0.12	0.03	0.07	0.03	0.1	0.14	0	0.03	0.04	0.03	0.11	0.04	0.21	0.13	0.09	0.22	0.3	0.07	0.12	0.12	0.16	0.06	0.03	0.07	0.12	0.24	0.18	0.13	0	1	0	3	1	1	4	3	4	1	2	1	3	4
OS12G0273300	0.16	0.12	0.13	0.2	0.09	0.19	0.6	0.55	0.3	0.77	0.46	0.21	0.96	0.83	0.91	1.23	0.59	0.65	0.09	0.14	0.14	0.35	0.41	0.52	0.53	0.31	0.15	0.63	0.63	0.24	0.86	0.44	0.91	0.61	0.93	0.81	5	3	4	6	3	6	17	18	9	22	14	6	28
OS12G0281600	0.57	1.31	0.82	1.08	2.73	1.29	1.66	1.25	2.29	3.08	2.94	2.26	2.63	1.63	1.73	2.56	2.89	2.73	0.58	2.24	1.24	1.29	1.51	1.62	1.33	1.26	1.79	1.87	2.94	2.44	2.39	1.16	1.53	3.55	4.55	3.72	19	42	32	40	105	47	54	51	85	107	101	81	91
OS12G0467300	2.8	2.89	3.28	4.14	2.66	4.11	3.87	3.14	5.21	4.77	3.23	4.04	4.95	3.46	4.71	4.17	3.57	4.24	3.25	4.48	3.6	3.39	2.18	4.69	6.13	3.49	4.54	7.88	4.32	5.16	10.33	10.26	7.07	7.33	10.82	10.59	119	105	144	174	120	181	153	145	219	190	138	164	202
OS12G0468300	7.17	7.58	9.28	5.87	1.66	8.73	10.74	6.84	13.51	9.79	6.45	12.16	5.63	4.12	6.18	5.37	2.31	2.51	4.93	6.9	8.74	7.52	3.82	10.4	14.08	9.75	14.3	9.37	5.91	9.68	7.53	4.86	8.6	5.17	1.46	2.37	53	48	71	43	13	67	74	55	99	68	48	86	40
OS12G0484900	0.18	0.07	0	0	0	0	0	0	0	0	0	0.06	0	0	0.06	0.07	0.15	0	0	0	0	0.05	0	0.07	0	0	0.07	0.05	0.06	0.73	0	0	0.63	0.06	0	0.61	3	1	0	0	0	0	0	0	0	0	0	1	0
OS12G0486800	0	0	0	0.12	0	0	0	0	0	0.04	0.08	0.04	0.29	0.07	0.08	0.18	0.03	0.05	0	0.04	0	0.07	0	0	0.08	0	0	0	0.08	0.12	0.09	0.19	0.05	0.04	0.16	0.05	0	0	0	3	0	0	0	0	0	1	2	1	7
OS12G0516300	31.97	37.25	27.66	43.2	44.2	42.14	38.38	42.61	40.34	39.29	34.08	31.58	35.28	34.79	35.69	31.51	27.15	27.66	37.55	44.74	39.09	43.57	53.73	47.64	43.1	45.25	49.24	34.83	33.83	43.81	42.43	42.69	34.73	27.41	24.42	30.67	904.13	894.36	859.88	1224.66	1380.55	1207.9	1042.07	1287.45	1101.51	1064.95	999.37	821.15	1035.14
OS12G0553200	6.81	6.05	4.09	10.68	7.6	6.6	13.09	14.62	8.33	13.25	13.05	6.48	16.41	11.56	14.35	11.6	8.02	12.58	9.99	6.57	9.21	15.89	11.85	10.81	23.09	16.44	15.86	19.54	14.37	14.62	21.02	15.45	15.26	15.49	8.82	14.86	172.92	131.56	107.66	268.59	204.74	173.99	309.99	404.24	209.74	316.07	333.86	157.53	400.49
OS12G0553600	9.97	12.6	8.76	16.78	15.65	15.52	16.27	14.58	17.96	15.75	16.35	13.09	13.45	11.91	13.23	8.61	9.23	11.28	9.52	13.43	12.92	16.38	16.74	15.61	19.49	14.65	21.1	19.16	12.54	18.26	15.68	13.7	13.31	8.49	7.01	14.1	327.95	355.08	298.46	546.75	546.71	530.1	498.94	522.31	585.76	486.98	541.77	412.31	425.37
OS12G0559400	0	0	0	0	0	0	0	0	0	0	0	0	0	0	0	0	0	0	0	0	0	0	0	0	0	0	0	0	0	0.05	0	0	0	0	0	0	0	0	0	0	0	0	0	0	0	0	0	0	0
OS12G0565100	3.69	4.17	2.95	8.73	5.81	6.5	12.55	10.53	9.83	9.85	8.55	6.35	7.69	8.07	8.37	5.71	3.79	5.43	3.83	3.37	5.04	8.38	8.17	6.52	11.86	8.89	13.27	7.62	7.48	11.91	10.89	7.67	8.61	5.03	4.23	6.04	121	117	100	283	202	221	383	375.43	319	303	281.9	199	242
OS12G0565200	0	0	0	0	0.12	0.12	0.26	0.22	0.37	0	0.12	0.26	0.38	0.11	0	0.14	0	0.14	0.17	0	0	0	0	0	0	0	0	0	0	0	0	0	0	0.13	0	0	0	0	0	0	1	1	2	2	3	0	1	2	3
OS12G0566050	0	0	0	0	0	0	0	0	0	0	0	0	0	0	0	0	0	0	0	0	0	0	0	0	0	0	0	0	0	0	0	0	0	0	0	0	0	0	0	0	0	0	0	0	0	0	0	0	0
OS12G0580300	4.15	4.32	3.75	4.47	4	3.57	5.42	7.47	3.88	6.63	5.2	7.07	11.56	7.77	6.14	7.37	6.18	6.29	3.9	7.19	4.07	4.54	5	2.14	7.05	7.96	3.82	7.61	8.23	3.93	9.36	6.82	6.28	6.9	4.5	6.13	46	41	43	49	47	41	56	90	42.65	69	58	75	123
OS12G0612700	1.26	3.15	4.15	1.43	1.75	1.85	1.32	2.34	0.63	0.96	0.39	1.4	0.85	2.07	3.25	1.43	1.92	3.78	2.65	3.64	2.72	1.25	1.86	2.26	1.53	1.67	2.58	2.87	1.59	1.63	1.86	3.23	3.76	1.69	2.67	3.33	24	39	64	26	43	40	10	28	10	18	12	16	24
OS12G0616800	10.05	20.02	14.95	10.59	14.18	9.06	5.28	20.21	6.42	9.01	13.51	7.33	13.17	20.95	14.52	13.36	12.74	23.95	7.33	19.36	16.24	11.61	23.36	12.18	8.9	33.33	12.83	9.11	26.59	21.53	13.47	24.26	17.09	11.45	14.22	23.87	139	237	214	145	208	130	68	304	88	117	188	97	175
OS12G0618600	0.44	1.6	1.45	0.44	0.24	0.78	0	0.4	0.31	0.2	0.12	0	0.26	0.16	0.13	0.28	0.69	0.58	0.17	1.33	1.02	0.33	0.63	0.99	0	0.06	0.07	0.36	0.41	0.26	0.35	0.06	0.07	0.55	0	0.88	7	22	24	7	4	13	0	7	5	3	2	0	4
OS12G0637000	0.22	0.52	0.14	0.37	2.08	0.85	0.16	0.74	0.15	0.08	0.88	0.31	0.54	0.64	1.72	0.58	1.76	1.37	0.1	0.16	0.08	0.32	3.66	0.5	0.29	1.12	0.43	0.12	1.54	0.46	0.08	0.77	1.06	0.24	0.99	0.69	3	6	2	5	30	12	2	11	2	1	12	4	7
We have 468 predicted target genes in total, but we found 421 genes in mRNA-Seq data at last.
[truncated: 33 more columns]
