# Supplementary material for: Identification of miRNAs Contributing to the Broad-Spectrum and Durable Blast Resistance in the Yunnan Local Rice Germplasm
Source: Front Plant Sci. 2021 Oct 14;12:749919. doi: 10.3389/fpls.2021.749919 (PMC8551726; doi:10.3389/fpls.2021.749919)
Supplement: Supplementary file 5 [file Table_5.XLSX]

## Sheet: Sheet1
Table S5 Primers used in this study
Primer name	Sequence (5' to 3')	Purpose
Osa-miR393a stemloop	GTCGTATCCAGTGCAGGGTCCGAGGTATTCGCACTGGATACGACGATCAA	Used for reverse transcription of osa-miR393a
Osa-miR3980a-5p stemloop	GTCGTATCCAGTGCAGGGTCCGAGGTATTCGCACTGGATACGACCCCTGA	Used for reverse transcription of osa-miR3980a-5p
Osa-miR7695 stemloop	GTCGTATCCAGTGCAGGGTCCGAGGTATTCGCACTGGATACGACTGCCTA	Used for reverse transcription of osa-miR7695
miR7767-3p stem loop	GTCGTATCCAGTGCAGGGTCCGAGGTATTCGCACTGGATACGACGGGAGA	Used for reverse transcription of miR7767
miR9664-3p stemloop	GTCGTATCCAGTGCAGGGTCCGAGGTATTCGCACTGGATACGACCCTACG	Used for reverse transcription of miR9664-3p
U6 RT-F	CGATAAAATTGGAACGATACAGA	miRNA reference gene for real-time PCR
U6 RT-R	ATTTGGACCATTTCTCGATTTGT	miRNA reference gene for real-time PCR
Osa-miR393a RT-F	AGCCCGTCCAAAGGGATCGCA	For real-time PCR
Osa-miR3980a-5p RT-F	AGCCCGAATCGACGGCCTCA	For real-time PCR
Osa-miR7695 RT-F	AGCCCGACGTGATGTGCCAC	For real-time PCR
miR7767-3p RT-F	AGCCCGCCCAAGATGAGTGC	For real-time PCR
miR9664-3p RT-F	AGCCCGATGCAGTCCTCGATG	For real-time PCR
miRNA RT-R (universal)	CAGTGCAGGGTCCGAGGTAT	For real-time PCR
ubi-F for RT	GCCCAAGAAGAAGATCAAGAAC	Reference gene for real-time PCR
ubi-R for RT	AGATAACAACGGAAGCATAAAAGTC	Reference gene for real-time PCR
LOC_Os01g09450.1 RT-F	CGTTCCCTGGCAGATGTT	For real-time PCR
LOC_Os01g09450.1 RT-R	CAGCTGCTGCCCTCTTC	For real-time PCR
LOC_Os01g72020.1 RT-F	CAACAGGATGGTGTACCTGAA	For real-time PCR
LOC_Os01g72020.1 RT-R	GGGAGAACAACGACGATGG	For real-time PCR
LOC_Os02g08364.1 RT-F	GACGACGACGACTTTCTTGT	For real-time PCR
LOC_Os02g08364.1 RT-R	CTGCTCTCCTTCTGTATATGCTC	For real-time PCR
LOC_Os02g17304.1 RT-F	AGCTGAGCAAACTGAGAGATG	For real-time PCR
LOC_Os02g17304.1 RT-R	CTTGACAAGCTTGGAGAGAGAG	For real-time PCR
LOC_Os02g18510.1 RT-F	GAGGTCAATGTCTCGTTGGATT	For real-time PCR
LOC_Os02g18510.1 RT-R	GGATGATTCGGGTGGATCTTG	For real-time PCR
LOC_Os04g43740.1 RT-F	CACACGGTGGTGTACGTC	For real-time PCR
LOC_Os04g43740.1 RT-R	GCGGCGAACTGGTACTC	For real-time PCR
LOC_Os06g17970.1 RT-F	TGTGCCTGCCCATGATATT	For real-time PCR
LOC_Os06g17970.1 RT-R	GTACCTTGACGCCATTTGATTT	For real-time PCR
LOC_Os07g46990.1 RT-F	GGGCACCACAAGATGAGAA	For real-time PCR
LOC_Os07g46990.1 RT-R	ATCTGGCTGTCAGAGACATTG	For real-time PCR
LOC_Os08g07774 RT-F	ATTGGGTGAGACAAGTCAAGAG	For real-time PCR
LOC_Os08g07774 RT-R	GCATCTTCTAGTTCCCGTAGTG	For real-time PCR
LOC_Os08g29809.1 RT-F	CAAGCATTGGAGGAGCTATCA	For real-time PCR
LOC_Os08g29809.1 RT-R	TCCCGTTAAGCCATGAATACC	For real-time PCR
LOC_Os08g31780.1 RT-F	GACGCTAGACCTGACAAACTC	For real-time PCR
LOC_Os08g31780.1 RT-R	GCTAATACCATCCGGCAATCT	For real-time PCR
LOC_Os08g42700.1 RT-F	GTAACCTGTTGAACCTGGAGAC	For real-time PCR
LOC_Os08g42700.1 RT-R	GATCCGGCATGGACGTATTT	For real-time PCR
LOC_Os08g44770.1 RT-F	GGTGCACCAGAAGATGAAGT	For real-time PCR
LOC_Os08g44770.1 RT-R	CCACTCAGAGGAATCTGCTTATC	For real-time PCR
LOC_Os10g02380.1 RT-F	TGGGAGCTCACTGAGGAA	For real-time PCR
LOC_Os10g02380.1 RT-R	TAAGCACCATCCCACAAATCT	For real-time PCR
LOC_Os10g04342.1 RT-F	CAGCACCGCACCAGTAATA	For real-time PCR
LOC_Os10g04342.1 RT-R	TGCCTTCAGTTCCTCAATCTC	For real-time PCR
LOC_Os11g13410 RT-F	CTCCTCGACAGCATCAGTAAG	For real-time PCR
LOC_Os11g13410 RT-R	AGCCATCGGCCTTGTATTT	For real-time PCR
LOC_Os11g34920.1 RT-F	TCAAGCAGTTGGCTACGATAAG	For real-time PCR
LOC_Os11g34920.1 RT-R	GCTTGGTAGAGTTGGCAGTAG	For real-time PCR
LOC_Os11g45750.1 RT-F	CAACGTCTGTTCTGTCGGTATAG	For real-time PCR
LOC_Os11g45750.1 RT-R	GAGAGAAGCAGTCGGGATACTA	For real-time PCR
LOC_Os11g45924.1 RT-F	CTGAAGAGCATGACAAGGAAGA	For real-time PCR
LOC_Os11g45924.1 RT-R	ATGGTGAACTACACAGGACAAA	For real-time PCR
LOC_Os12g13550 RT-F	TCTACAAGGCTTCCCAATTTCT	For real-time PCR
LOC_Os12g13550 RT-R	TCTTACGCCGCTCGTTTATC	For real-time PCR
LOC_Os12g17090.1 RT-F	GTTCGTTCGCTGTTCTTTGAC	For real-time PCR
LOC_Os12g17090.1 RT-R	GCACCCATCCAGAACCAATA	For real-time PCR
LOC_Os12g28100 RT-F	GCAGTATGCAGCCTCCTATT	For real-time PCR
LOC_Os12g28100 RT-R	GTTGCTCACAGCAGACAAATC	For real-time PCR
LOC_Os12g36720.1 RT-F	TTCGCCGATTATCTCTCCATAAC	For real-time PCR
LOC_Os12g36720.1 RT-R	CGACCTTGCCGAAGATAGTAAT	For real-time PCR
LOC_Os12g37760.1 RT-F	GGGTCGCCATTGGCTATTAT	For real-time PCR
LOC_Os12g37760.1 RT-R	TTGCAGTGTTGAACCGATAGA	For real-time PCR
MIR319A-F	AGGTCGACTCTAGAGTCGGACGCATATTACACATG	Construction of miR9664 overexpression vector
MIR319A-R	AGCTCGGTACCCGGGTAGTTTACTCGCTAGGGTTC	Construction of miR9664 overexpression vector
Ⅰ- miR9664-3p	GAATGCAGTCCTCGATGTCGTAGGTCTCTCTTTTGTATTCC	Construction of miR9664 overexpression vector
Ⅱ- miR9664-3p	GACCTACGACATCGAGGACTGCATTCAAAGAGAATCAATGA	Construction of miR9664 overexpression vector
Ⅲ- miR9664-3p	GACCTTCGACATCGAGCACTGCAATCACAGGTCGTGATATG	Construction of miR9664 overexpression vector
Ⅳ- miR9664-3p	GATTGCAGTGCTCGATGTCGAAGGTCTACATATATATTCCT	Construction of miR9664 overexpression vector
IPS1-F	AGGTCGACTCTAGAGTGGCCATCCCCTAGCTAGGT	Construction of miR9664 knockdown vector
IPS1-R	AGCTCGGTACCCGGGCGGAAGCAAATTTACATGCA	Construction of miR9664 knockdown vector
miR9664mimic-F	TTCCTACGACATCGATCAGGACTGCATAGCTTCGGTTCCCCTCGGAATCA	Construction of miR9664 knockdown vector
miR9664mimic-R	CTATGCAGTCCTGATCGATGTCGTAGGTAATTTCTAGAGGGAGATAAACA	Construction of miR9664 knockdown vector
Hyg-F	AATTGCCGTCAACCAAGCTC	Identification of positive transgenic plants
Hyg-R	GCCGATCTTAGCCAGACGAG	Identification of positive transgenic plants
LOC_Os02g17304 outer	TCTTGTTGTCATTGGCAGGCAAGG	RLM-RACE
LOC_Os02g17304 inner	TTGGCTTGCTCATACAAGGCTGG	RLM-RACE
LOC_Os08g07774 outer	AGCTTCCCATGCTTCAACATCCC	RLM-RACE
LOC_Os08g07774 inner	ACCTCTCCCCTTGGCAAACCAC	RLM-RACE
LOC_Os08g29809 outer	AACGTGAGCTCGCAACATTGGAC	RLM-RACE
LOC_Os08g29809 inner	TCTTCCATGGTCAGCAGCTCGAC	RLM-RACE
LOC_Os08g31780 outer	TACTCCAGACATCATCAATCAAGACG	RLM-RACE
LOC_Os08g31780 inner	CTCCTCAAAGAATGCCGACAACC	RLM-RACE
LOC_Os08g42700 outer	AGGTGTTCCTTGTGGTGTCTTGCC	RLM-RACE
LOC_Os08g42700 inner	TTGTCCGTCGTTGGTGATGAGC	RLM-RACE
LOC_Os10g04342 outer	AACCGTGATAGCTTTCCATGCCG	RLM-RACE
LOC_Os10g04342 inner	TTCCGCGAAGAGAGTAGCCAACC	RLM-RACE
LOC_Os11g13410 outer	TCCTGCTTGCATGGATAGTTGTGG	RLM-RACE
LOC_Os11g13410 inner	ACTTGTTCGTCGGTGTGCTCTCC	RLM-RACE
LOC_Os11g34920 outer	AGCATGTTCTTGAATACCCCCACC	RLM-RACE
LOC_Os11g34920 inner	TGCCAACAAGCTCCGAAACATTC	RLM-RACE
LOC_Os11g45750 outer	AGTTTTCAAGCTTGTTCACCGCG	RLM-RACE
LOC_Os11g45750 inner	TCTCTGAACTGCGTGGGATGCC	RLM-RACE
LOC_Os11g45790 outer	TCGTCACTATTATCCTGCTGCCTG	RLM-RACE
LOC_Os11g45790 inner	TCATCGTAGACCGCCTTGGCG	RLM-RACE
LOC_Os12g17090 outer	ACCTTCCACGCACCTATGTCCC	RLM-RACE
LOC_Os12g17090 inner	ATCAATCCCCACGAGCCTCTCC	RLM-RACE
LOC_Os12g28100 outer	ACCATACCATGGAAATCAACGCAAC	RLM-RACE
LOC_Os12g28100 inner	TTGCCAATGCCTCCAAAGCC	RLM-RACE
LOC_Os12g37760 outer	AGACACGATCATGGTCAGGAGTGC	RLM-RACE
LOC_Os12g37760 inner	TCCAACAAGCCCGTCTGACTCAG	RLM-RACE
